# Supplementary material for: Developing a fully applicable machine learning (ML) based sex classification model using linear cranial dimensions
Source: Research Square preprint supplement (doi:10.21203/rs.3.rs-3939483/v1), 2024-02-15
Supplement: Supplementary file 1 [file 0bb382873d24d5ea1d888dfb.xlsx]

## Sheet: Content
Standard measurements	Train vs. test set
	Sex differences
	Regional differences
	PCA loadings
All interlandmark distances	Train vs. test set
	Sex differences
	Regional differences
	PCA loadings

## Sheet: Standard train vs. test set
	Train (males)					Tests (males)					t-test (males)		Train (females)					Tests (females)					t-test (females)
	mean	median	min	max	std	mean	median	min	max	std	t	P	mean	median	min	max	std	mean	median	min	max	std	t	P
GOL	184.861	184.762	168.114	204.918	8.38417	185.147	183.505	173.369	205.414	7.56868	-0.209984	0.834347	174.802	173.842	156.582	205.688	7.4181	175.023	173.889	160.585	194.773	8.58247	-0.149996	0.881328
NOL	181.928	181.603	165.71	202.296	8.25504	182.582	180.764	171.104	202.743	7.07471	-0.508053	0.613087	173.207	172.694	156.316	201.484	7.1481	173.291	171.845	159.085	192.185	8.42293	-0.0580154	0.953954
XCB	148.236	148.201	134.177	164.146	6.45404	149.523	150.653	133.086	161.003	7.71285	-0.976986	0.333029	143.882	144.173	128.495	158.142	5.88976	144.571	144.7	126.993	153.389	5.29943	-0.721823	0.473025
ZYB	136.564	136.88	117.362	150.337	5.27907	137.732	136.583	127.182	151.36	4.93879	-1.32548	0.189863	128.075	128.262	116.656	140.47	4.31035	128.316	128.526	119.34	136.89	3.79427	-0.352287	0.725756
BBH	141.219	141.262	126.13	155.621	5.62636	141.915	142.34	132.058	149.491	4.93095	-0.779621	0.438417	134.374	134.547	116.785	154.738	5.59249	134.585	134.537	122.661	146.902	5.45297	-0.21936	0.827111
BNL	107.493	107.449	95.8467	120.676	4.98623	108.649	108.22	97.1792	122.529	5.06528	-1.30063	0.198489	100.841	101.467	89.3957	120.462	4.58233	101.646	101.453	93.0323	116.156	5.28838	-0.886411	0.379336
AUB	130.814	130.875	114.209	144.335	5.10776	131.434	129.961	123.129	142.853	5.27519	-0.67257	0.503901	123.938	124.094	112.872	135.249	4.50936	123.936	123.606	117.376	132.303	4.03118	0.00269667	0.997857
WFB	101.074	101.037	88.691	109.301	4.30522	102.14	102.6	90.838	114.789	4.67193	-1.31536	0.193755	98.0519	98.0585	86.4806	112.744	4.32186	98.0725	98.1745	88.8563	107.558	3.43357	-0.0324354	0.974215
UFBR	107.846	107.845	93.8993	116.888	4.28273	109.163	109.59	99.9469	120.851	4.40104	-1.709	0.0927975	103.197	103.384	93.4713	117.266	3.9773	103.253	102.874	96.5775	113.916	3.50888	-0.0896368	0.92885
NLH_L	54.5469	54.4479	45.0182	67.9669	2.88089	54.7802	54.9753	49.9685	62.7061	2.91466	-0.455674	0.650307	51.3639	51.2229	45.3702	58.6871	2.637	51.8328	51.2322	46.7019	57.1118	2.60282	-1.02086	0.311441
NLH_R	54.2058	54.2413	43.8359	66.116	2.85131	54.7232	54.5334	49.3273	61.9856	2.75617	-1.05924	0.293693	51.3507	51.2321	45.9662	58.0234	2.67409	51.9255	52.0046	45.8963	57.4574	2.71843	-1.20491	0.233095
NLB	24.4231	24.3995	20.2299	31.729	2.18658	24.5393	24.3497	20.7517	27.9053	1.90316	-0.336548	0.737525	23.768	23.9015	17.8285	30.6457	1.98122	23.8565	24.178	19.1025	26.7988	1.96457	-0.25547	0.799241
OBB_L	40.24	40.172	35.3565	44.3771	1.77639	40.8139	40.6338	35.9811	45.4118	1.91316	-1.72732	0.0896023	38.767	38.5985	32.6126	44.2829	1.94113	39.0925	38.7091	35.7288	42.5719	1.83361	-0.997084	0.322618
OBB_R	40.1153	40.0222	34.8554	44.4144	1.88902	40.8052	40.8601	37.0835	45.0358	1.8284	-2.12977	0.0372629	39.0018	38.9739	34.3936	43.2281	1.69772	39.0544	39.1457	35.619	43.2816	1.88962	-0.160885	0.872773
OBH_L	34.0818	33.9779	28.9191	39.4586	2.2754	34.6335	34.5946	29.5652	39.1992	2.41395	-1.31252	0.194627	33.666	33.7504	27.0875	39.7053	2.22896	33.6576	33.3941	29.1225	37.2037	1.78027	0.0255078	0.979721
OBH_R	33.9048	33.9666	27.7519	39.8598	2.1955	34.6144	34.6116	29.022	39.723	2.51698	-1.63977	0.106857	33.5985	33.6917	25.7668	39.5153	2.28775	33.7623	33.5734	30.578	38.2533	1.86401	-0.476536	0.635175
EKB	101.322	101.767	86.206	109.878	3.78334	102.921	103.115	94.8158	114.751	3.93559	-2.3254	0.0236005	97.4973	97.8009	88.045	109.103	3.6777	97.7075	98.0182	91.4037	105.32	3.30581	-0.353091	0.725177
DKB	25.2207	24.9938	18.8229	36.1471	2.89392	25.8838	25.4785	19.6508	36.108	3.37424	-1.14618	0.256817	23.518	23.6668	17.6963	29.8332	2.39667	23.6831	23.7346	18.306	30.1777	2.5991	-0.366211	0.715589
FRC	113.067	113.167	97.65	128.184	5.51739	113.063	111.766	106.328	127.467	4.85682	0.00461786	0.99633	107.927	107.952	96.2922	127.453	5.38883	107.016	107.571	97.8176	117.205	4.26326	1.14929	0.254237
PAC	118.467	118.773	99.0173	138.767	7.17998	118.128	118.72	103.577	131.143	6.71805	0.282192	0.778734	113.042	113.294	96.5192	135.525	6.68222	112.797	112.011	97.8025	131.302	7.17857	0.19662	0.844833
OCC	97.5991	97.7957	82.5194	114.708	6.35107	98.0025	96.9804	85.5251	114.903	6.69396	-0.345634	0.73089	95.1512	94.9673	78.5246	115.469	6.49721	95.7584	96.0552	81.0204	114.391	5.97684	-0.567224	0.572577
FOL	37.0298	36.9703	30.7452	43.8845	2.66619	37.3479	37.386	31.7838	42.8268	2.93932	-0.625598	0.534148	35.7764	35.8584	28.0722	42.6522	2.3552	35.4874	35.449	31.7615	40.8852	2.11514	0.758886	0.450695
FOB	32.4266	32.0585	26.6036	39.9222	2.42763	32.4264	32.1012	27.9724	37.5355	2.55802	0.000465407	0.99963	31.2387	31.1421	25.1026	36.9829	2.36025	31.2987	31.1173	24.3267	38.4919	2.6766	-0.130078	0.896984
MDH_L	32.2347	32.4224	22.6906	45.2857	3.67914	33.2336	34.0362	21.5139	38.8972	3.49073	-1.60833	0.112886	28.7223	28.3942	20.4405	36.7937	3.07154	29.422	29.6483	22.3314	35.313	2.9459	-1.33795	0.185881
MDH_R	32.214	32.7556	22.0273	41.5745	3.72147	33.2634	34.1643	24.0595	38.5525	3.45226	-1.70037	0.094025	28.5584	28.6503	21.2126	38.7422	3.21875	29.4889	29.3732	22.0857	34.4926	2.81651	-1.82361	0.0727598
ASB	118.517	118.482	105.413	134.543	4.91609	119.013	118.934	108.101	127.802	5.12453	-0.553649	0.581968	114.67	114.721	101.278	128.77	4.74431	115.415	114.543	107.217	127.744	4.50555	-0.929092	0.356477
ZMB	93.8005	93.8548	74.8681	112.33	5.46429	94.7004	93.9302	86.6184	108.17	4.88609	-1.02176	0.310712	89.7352	89.6181	74.9507	103.527	4.70355	89.3955	88.3965	80.4253	101.23	4.6258	0.415808	0.679038
ZOB	55.2757	55.7348	41.4257	67.6498	4.9329	57.0849	55.893	47.3629	70.5489	5.72967	-1.84034	0.0712496	54.6543	54.6568	37.9824	70.3694	5.46132	55.7075	56.2475	41.0599	68.1564	5.3383	-1.11573	0.268978

## Sheet: Standard sex dimorphism
	Train (males)					Train (females)					t-test (train)		Test (males)					Test (females)					t-test (test)
	mean	median	min	max	std	mean	median	min	max	std	t	P	mean	median	min	max	std	mean	median	min	max	std	t	P
GOL	184.861	184.762	168.114	204.918	8.38417	174.802	173.842	156.582	205.688	7.4181	11.6119	2.46341e-26	185.147	183.505	173.369	205.414	7.56868	175.023	173.889	160.585	194.773	8.58247	5.59549	3.24955e-07
NOL	181.928	181.603	165.71	202.296	8.25504	173.207	172.694	156.316	201.484	7.1481	10.3204	8.66498e-22	182.582	180.764	171.104	202.743	7.07471	173.291	171.845	159.085	192.185	8.42293	5.34227	9.31638e-07
XCB	148.236	148.201	134.177	164.146	6.45404	143.882	144.173	128.495	158.142	5.88976	6.43891	4.25782e-10	149.523	150.653	133.086	161.003	7.71285	144.571	144.7	126.993	153.389	5.29943	3.34712	0.00132392
ZYB	136.564	136.88	117.362	150.337	5.27907	128.075	128.262	116.656	140.47	4.31035	16.0979	4.21692e-43	137.732	136.583	127.182	151.36	4.93879	128.316	128.526	119.34	136.89	3.79427	9.56198	1.62697e-14
BBH	141.219	141.262	126.13	155.621	5.62636	134.374	134.547	116.785	154.738	5.59249	11.1505	9.73269e-25	141.915	142.34	132.058	149.491	4.93095	134.585	134.537	122.661	146.902	5.45297	6.30538	1.64684e-08
BNL	107.493	107.449	95.8467	120.676	4.98623	100.841	101.467	89.3957	120.462	4.58233	12.6932	2.48975e-30	108.649	108.22	97.1792	122.529	5.06528	101.646	101.453	93.0323	116.156	5.28838	6.04819	4.78703e-08
AUB	130.814	130.875	114.209	144.335	5.10776	123.938	124.094	112.872	135.249	4.50936	13.0411	1.37846e-31	131.434	129.961	123.129	142.853	5.27519	123.936	123.606	117.376	132.303	4.03118	7.14327	5.65793e-10
WFB	101.074	101.037	88.691	109.301	4.30522	98.0519	98.0585	86.4806	112.744	4.32186	6.4031	5.19844e-10	102.14	102.6	90.838	114.789	4.67193	98.0725	98.1745	88.8563	107.558	3.43357	4.43728	3.2318e-05
UFBR	107.846	107.845	93.8993	116.888	4.28273	103.197	103.384	93.4713	117.266	3.9773	10.2792	1.09501e-21	109.163	109.59	99.9469	120.851	4.40104	103.253	102.874	96.5775	113.916	3.50888	6.64005	4.50412e-09
NLH_L	54.5469	54.4479	45.0182	67.9669	2.88089	51.3639	51.2229	45.3702	58.6871	2.637	10.532	1.50629e-22	54.7802	54.9753	49.9685	62.7061	2.91466	51.8328	51.2322	46.7019	57.1118	2.60282	4.77023	8.54996e-06
NLH_R	54.2058	54.2413	43.8359	66.116	2.85131	51.3507	51.2321	45.9662	58.0234	2.67409	9.43867	6.98993e-19	54.7232	54.5334	49.3273	61.9856	2.75617	51.9255	52.0046	45.8963	57.4574	2.71843	4.57075	1.79584e-05
NLB	24.4231	24.3995	20.2299	31.729	2.18658	23.768	23.9015	17.8285	30.6457	1.98122	2.86889	0.00438551	24.5393	24.3497	20.7517	27.9053	1.90316	23.8565	24.178	19.1025	26.7988	1.96457	1.57866	0.118465
OBB_L	40.24	40.172	35.3565	44.3771	1.77639	38.767	38.5985	32.6126	44.2829	1.94113	7.23446	3.30137e-12	40.8139	40.6338	35.9811	45.4118	1.91316	39.0925	38.7091	35.7288	42.5719	1.83361	4.10837	9.7696e-05
OBB_R	40.1153	40.0222	34.8554	44.4144	1.88902	39.0018	38.9739	34.3936	43.2281	1.69772	5.6653	3.21085e-08	40.8052	40.8601	37.0835	45.0358	1.8284	39.0544	39.1457	35.619	43.2816	1.88962	4.21141	6.75268e-05
OBH_L	34.0818	33.9779	28.9191	39.4586	2.2754	33.666	33.7504	27.0875	39.7053	2.22896	1.68691	0.0925604	34.6335	34.5946	29.5652	39.1992	2.41395	33.6576	33.3941	29.1225	37.2037	1.78027	2.0578	0.0432443
OBH_R	33.9048	33.9666	27.7519	39.8598	2.1955	33.5985	33.6917	25.7668	39.5153	2.28775	1.24838	0.212772	34.6144	34.6116	29.022	39.723	2.51698	33.7623	33.5734	30.578	38.2533	1.86401	1.7205	0.0896432
EKB	101.322	101.767	86.206	109.878	3.78334	97.4973	97.8009	88.045	109.103	3.6777	9.36734	1.17655e-18	102.921	103.115	94.8158	114.751	3.93559	97.7075	98.0182	91.4037	105.32	3.30581	6.41545	1.09628e-08
DKB	25.2207	24.9938	18.8229	36.1471	2.89392	23.518	23.6668	17.6963	29.8332	2.39667	5.85585	1.17416e-08	25.8838	25.4785	19.6508	36.108	3.37424	23.6831	23.7346	18.306	30.1777	2.5991	3.26792	0.00165115
FRC	113.067	113.167	97.65	128.184	5.51739	107.927	107.952	96.2922	127.453	5.38883	8.6125	2.93709e-16	113.063	111.766	106.328	127.467	4.85682	107.016	107.571	97.8176	117.205	4.26326	5.91779	8.60103e-08
PAC	118.467	118.773	99.0173	138.767	7.17998	113.042	113.294	96.5192	135.525	6.68222	7.14672	5.72758e-12	118.128	118.72	103.577	131.143	6.71805	112.797	112.011	97.8025	131.302	7.17857	3.42949	0.000970978
OCC	97.5991	97.7957	82.5194	114.708	6.35107	95.1512	94.9673	78.5246	115.469	6.49721	3.48171	0.00056489	98.0025	96.9804	85.5251	114.903	6.69396	95.7584	96.0552	81.0204	114.391	5.97684	1.58154	0.117854
FOL	37.0298	36.9703	30.7452	43.8845	2.66619	35.7764	35.8584	28.0722	42.6522	2.3552	4.55307	7.46832e-06	37.3479	37.386	31.7838	42.8268	2.93932	35.4874	35.449	31.7615	40.8852	2.11514	3.24944	0.00176993
FOB	32.4266	32.0585	26.6036	39.9222	2.42763	31.2387	31.1421	25.1026	36.9829	2.36025	4.5338	8.1014e-06	32.4264	32.1012	27.9724	37.5355	2.55802	31.2987	31.1173	24.3267	38.4919	2.6766	1.92642	0.0577022
MDH_L	32.2347	32.4224	22.6906	45.2857	3.67914	28.7223	28.3942	20.4405	36.7937	3.07154	9.47059	6.22482e-19	33.2336	34.0362	21.5139	38.8972	3.49073	29.422	29.6483	22.3314	35.313	2.9459	5.27765	1.20275e-06
MDH_R	32.214	32.7556	22.0273	41.5745	3.72147	28.5584	28.6503	21.2126	38.7422	3.21875	9.60115	2.2156e-19	33.2634	34.1643	24.0595	38.5525	3.45226	29.4889	29.3732	22.0857	34.4926	2.81651	5.35799	8.91795e-07
ASB	118.517	118.482	105.413	134.543	4.91609	114.67	114.721	101.278	128.77	4.74431	7.27617	2.50157e-12	119.013	118.934	108.101	127.802	5.12453	115.415	114.543	107.217	127.744	4.50555	3.33463	0.00131759
ZMB	93.8005	93.8548	74.8681	112.33	5.46429	89.7352	89.6181	74.9507	103.527	4.70355	7.28655	2.43075e-12	94.7004	93.9302	86.6184	108.17	4.88609	89.3955	88.3965	80.4253	101.23	4.6258	4.98641	3.65169e-06
ZOB	55.2757	55.7348	41.4257	67.6498	4.9329	54.6543	54.6568	37.9824	70.3694	5.46132	1.09122	0.275974	57.0849	55.893	47.3629	70.5489	5.72967	55.7075	56.2475	41.0599	68.1564	5.3383	1.11244	0.269384

## Sheet: Standard reg differences
	Split males					Zagreb males					t-test (males)		Split females					Zagreb females					t-test (females)
	mean	median	min	max	std	mean	median	min	max	std	t	P	mean	median	min	max	std	mean	median	min	max	std	t	P
GOL	187.555	189.712	8.43727	171.44	204.918	181.787	182.736	7.22708	168.114	198.399	4.75754	4.25501e-06	176.907	176.85	8.20532	156.582	205.688	172.341	171.761	5.47407	159.225	188.798	4.28172	3.22616e-05
NOL	184.63	185.901	8.32281	167.722	202.296	178.845	178.658	7.04826	165.71	195.785	4.86314	2.67895e-06	175.035	174.688	7.92745	156.316	201.484	171.071	170.362	5.42494	157.809	188.037	3.81334	0.000196297
XCB	146.21	145.746	6.2422	134.748	161.299	150.547	150.113	5.92573	134.177	164.146	-4.60253	8.32342e-06	142.289	142.129	5.79121	128.495	154.495	145.744	145.293	5.47517	132.834	158.142	-3.95756	0.000112717
ZYB	136.331	136.997	5.48831	117.362	150.337	136.83	136.446	5.05186	124.879	149.478	-0.611278	0.541859	127.604	127.963	4.20007	116.656	136.552	128.625	128.568	4.39918	117.72	140.47	-1.52746	0.128639
BBH	141.854	141.469	5.47251	126.31	155.621	140.494	141.09	5.7464	126.13	153.867	1.55941	0.120879	135.288	135.293	5.89237	121.24	154.738	133.305	133.611	5.05048	116.785	145.619	2.34172	0.0203895
BNL	108.658	108.675	4.8911	96.9981	120.676	106.164	104.762	4.78566	95.8467	118.811	3.325	0.00109228	101.708	102.023	4.85656	91.0498	120.462	99.8286	99.7324	4.03913	89.3957	110.519	2.72975	0.00702699
AUB	130.748	131.124	5.01605	114.209	142.298	130.888	130.848	5.24199	117.758	144.335	-0.176065	0.860466	123.713	124.088	4.36712	112.872	135.249	124.201	124.094	4.68515	113.445	134.881	-0.691387	0.490344
WFB	100.783	100.715	4.2775	88.691	109.301	101.407	101.553	4.34022	91.5698	109.062	-0.932862	0.352284	97.8164	97.5876	4.47124	86.4806	112.744	98.3271	98.2639	4.15254	86.7094	107.785	-0.764576	0.445624
UFBR	108.305	108.739	4.6519	93.8993	116.888	107.322	107.449	3.78	98.8452	115.516	1.50582	0.134035	103.198	103.565	4.02397	93.4713	117.266	103.195	103.061	3.94837	93.7729	115.376	0.00536985	0.995722
NLH_L	54.4486	54.0973	3.15506	45.0182	67.9669	54.659	54.5452	2.54796	47.0074	60.2761	-0.476202	0.634564	51.6351	51.4429	2.74201	46.4367	58.6871	51.0469	50.9819	2.48894	45.3702	56.0693	1.45252	0.148263
NLH_R	54.1195	54.0039	3.10057	43.8359	66.116	54.3043	54.4404	2.55374	47.4682	59.61	-0.422077	0.67352	51.5747	51.1838	2.72542	46.4544	58.0234	51.0888	51.4175	2.60603	45.9662	56.6593	1.17595	0.241329
NLB	24.2811	24.3307	2.14589	20.2299	31.1698	24.5851	24.6548	2.23491	20.3825	31.729	-0.893467	0.372947	23.7777	24.0205	1.97441	17.8285	28.2529	23.7568	23.8535	2.00205	18.5311	30.6457	0.0676131	0.946178
OBB_L	40.0633	40.0133	1.82179	35.3565	44.3771	40.4416	40.2109	1.71247	37.0453	44.1568	-1.38251	0.168694	38.8317	38.6345	2.06852	34.8101	44.2829	38.6913	38.5817	1.79127	32.6126	42.1768	0.47013	0.638883
OBB_R	39.7158	39.6086	1.93487	34.8554	43.64	40.5711	40.5888	1.73763	37.0569	44.4144	-3.00971	0.00302602	38.9262	38.6871	1.84593	34.3936	42.9197	39.0903	39.17	1.51342	34.8139	43.2281	-0.631061	0.528875
OBH_L	34.034	33.6252	2.29067	29.1425	39.0663	34.1362	34.1505	2.27142	28.9191	39.4586	-0.288898	0.773028	33.5842	33.4075	2.12916	27.7244	38.6388	33.7615	33.8537	2.3507	27.0875	39.7053	-0.507418	0.612583
OBH_R	33.8063	34.0031	2.31538	27.7519	38.6608	34.0172	33.8877	2.05931	28.7933	39.8598	-0.622916	0.5342	33.5768	33.5662	2.3109	27.8702	38.3694	33.6239	33.8608	2.27524	25.7668	39.5153	-0.132238	0.89496
EKB	101.45	101.836	4.09996	86.206	109.878	101.176	101.464	3.40679	94.8724	108.299	0.472778	0.636998	97.4161	97.9333	3.65412	89.4854	109.103	97.5923	97.617	3.72679	88.045	107.328	-0.307367	0.758964
DKB	26.4974	26.1073	2.86677	18.8229	36.1471	23.7638	23.5767	2.15135	19.013	28.7153	7.01884	5.87841e-11	24.1125	24.1598	2.19328	18.3705	29.8332	22.8231	22.8891	2.45054	17.6963	28.6787	3.55638	0.00049982
FRC	114.603	114.329	4.79857	97.65	124.776	111.314	111.719	5.78553	98.6513	128.184	3.96539	0.000113083	109.06	109.171	5.44157	97.3955	127.453	106.602	106.459	5.04502	96.2922	117.663	3.02733	0.00286639
PAC	118.436	118.954	7.61763	99.0173	138.767	118.502	118.587	6.69463	101.286	134.664	-0.0598164	0.952374	114.268	113.868	7.35208	96.5192	135.525	111.61	112.314	5.51122	98.5242	122.437	2.66447	0.00848936
OCC	99.1223	99.3828	6.04145	83.7228	114.708	95.8611	94.8059	6.28516	82.5194	110.023	3.40646	0.000832039	94.9726	94.8496	6.71632	78.5246	111.935	95.36	94.9738	6.26872	85.7033	115.469	-0.385175	0.700608
FOL	36.9817	36.9025	2.79365	30.8841	43.8845	37.0848	36.9894	2.52978	30.7452	41.4645	-0.250095	0.802825	35.8512	35.6626	2.31727	31.1262	42.6522	35.689	35.9869	2.41104	28.0722	39.876	0.441161	0.659696
FOB	31.626	31.4897	2.25977	26.6036	39.6416	33.3401	33.1591	2.29846	29.4463	39.9222	-4.84623	2.9336e-06	30.5964	30.5601	2.23398	25.1026	36.3876	31.9896	31.8758	2.29426	27.326	36.9829	-3.95944	0.000112892
MDH_L	33.7256	33.6727	3.30181	26.5056	45.2857	30.5337	30.8034	3.34995	22.6906	40.0167	6.18453	4.91409e-09	28.8834	28.6362	2.65611	22.7492	34.9959	28.5341	28.0556	3.50404	20.4405	36.7937	0.7162	0.475059
MDH_R	33.5001	33.6891	3.44145	24.2715	41.5745	30.7465	30.7676	3.49687	22.0273	37.8417	5.11475	8.81412e-07	28.8371	29.0677	2.91607	21.6463	37.7608	28.2326	27.841	3.53153	21.2126	38.7422	1.19363	0.234539
ASB	118.354	118.368	4.26562	105.413	126.543	118.703	118.609	5.58941	106.55	134.543	-0.449349	0.65386	114.057	114.17	4.32652	101.278	125.733	115.387	115.454	5.12609	103.855	128.77	-1.79455	0.0747467
ZMB	94.3843	94.1182	5.46033	81.3862	112.33	93.1344	93.6541	5.42702	74.8681	106.352	1.48055	0.140663	89.4741	89.5903	4.74007	74.9507	103.527	90.0405	89.8492	4.67284	81.03	101.874	-0.775746	0.439032
ZOB	54.1809	54.6224	5.30494	41.4257	67.6498	56.5249	56.7619	4.16297	46.0175	65.8427	-3.19449	0.00168168	53.347	53.132	5.20925	37.9824	70.3694	56.1823	56.399	5.3832	44.7489	70.292	-3.44377	0.000733202

## Sheet: Standard PCA loadings
	PC1	PC2
GOL	0.219801	-0.33765
NOL	0.220018	-0.334204
XCB	0.140295	0.210918
ZYB	0.267542	0.1472
BBH	0.181156	-0.309689
BNL	0.212014	-0.247379
AUB	0.247387	0.111703
WFB	0.218728	0.191914
UFBR	0.271206	0.126537
NLH_L	0.222306	0.021295
NLH_R	0.219607	0.0214248
NLB	0.113115	0.174326
OBB_L	0.209478	0.0951039
OBB_R	0.191395	0.175993
OBH_L	0.0992131	0.19351
OBH_R	0.101541	0.237811
EKB	0.267771	0.182774
DKB	0.170735	0.0435398
FRC	0.184976	-0.228032
PAC	0.134849	-0.27637
OCC	0.101993	-0.260663
FOL	0.129986	-0.0356887
FOB	0.0992616	0.0522329
MDH_L	0.191563	-0.095929
MDH_R	0.191866	-0.101435
ASB	0.174931	-0.035045
ZMB	0.186302	0.156929
ZOB	0.106419	0.198562

## Sheet: All train vs. test set
	Train (males)					Tests (males)					t-test (males)		Train (females)					Tests (females)					t-test (females)
	mean	median	min	max	std	mean	median	min	max	std	t	P	mean	median	min	max	std	mean	median	min	max	std	t	P
al_l_al_r	24.4231	24.3995	20.2299	31.729	2.18658	24.5393	24.3497	20.7517	27.9053	1.90316	23.768	23.9015	17.8285	30.6457	1.98122	23.8565	24.178	19.1025	26.7988	1.96457	-0.336548	0.737525	-0.25547	0.799241
al_l_b	148.697	148.725	133.406	164.576	5.36357	149.063	148.728	139.904	162.288	4.75357	141.555	141.772	129.191	164.354	5.68561	141.217	141.364	132.438	153.249	5.00216	-0.425716	0.671721	0.373502	0.709983
al_l_d_l	38.629	38.4628	30.9582	46.4533	2.80152	38.9773	38.7979	33.7217	46.3213	3.19763	34.9642	35.4218	23.4054	44.776	4.05449	35.8239	35.4397	28.0735	43.1506	3.47609	-0.63322	0.529252	-1.35833	0.178922
al_l_d_r	46.1012	45.8839	36.9058	53.6288	3.00446	46.3953	46.2124	39.0929	53.3121	3.60831	42.1301	42.28	34.7092	51.1835	3.76507	42.6043	42.2967	37.0556	50.6627	3.80488	-0.477459	0.63501	-0.709435	0.480864
al_l_ec_l	53.2274	53.3677	46.4239	58.7277	2.51238	53.8658	53.8554	49.2129	58.7601	2.48818	50.3256	50.3072	43.2766	57.9066	2.74589	50.7126	50.7879	43.7972	55.5151	2.52096	-1.45488	0.150955	-0.856823	0.394784
al_l_ec_r	72.6909	73.1244	64.8073	80.3859	2.86709	73.7329	73.4924	68.9929	80.4411	2.58966	69.7768	69.6339	63.3713	77.0192	2.72953	69.5934	69.4116	64.1295	75.6283	2.57474	-2.23731	0.0287578	0.399949	0.690574
al_l_ft_l	69.2924	69.6188	57.7476	79.9311	3.81801	70.4248	70.1715	63.0135	77.2856	3.43585	64.7904	64.7169	55.5697	76.1626	3.98059	65.6719	64.7957	56.5566	77.8626	4.64313	-1.83114	0.0717237	-1.10728	0.273122
al_l_ft_r	85.3583	85.1895	74.1529	95.3832	3.60735	86.1403	85.4982	80.6129	93.8326	3.01191	80.7453	80.7061	72.8415	92.6376	3.56857	81.1426	80.8032	72.8796	92.6295	4.12047	-1.41661	0.161129	-0.561595	0.576722
al_l_ftm_l	60.5498	60.7803	52.8956	69.0991	2.99244	61.0018	60.6339	54.8012	67.5079	2.72998	57.3381	57.3631	49.4466	66.6424	2.93848	57.3848	57.1605	51.0844	62.4778	2.76801	-0.922773	0.359622	-0.094794	0.924785
al_l_ftm_r	79.4949	79.6013	68.6864	89.0865	3.23144	80.1583	80.0231	75.2472	88.1884	2.73297	76.0021	76.0472	69.6932	85.3192	2.91666	75.8518	75.7837	69.1555	84.3464	2.93557	-1.32865	0.188423	0.291155	0.771957
al_l_l	186.594	186.149	167.506	208.054	8.00417	187.052	186.306	176.909	206	6.70407	178.548	177.851	157.941	201.59	7.25477	178.609	177.518	164.16	193.605	7.85	-0.372945	0.710344	-0.0452138	0.964098
al_l_ms_l	110.438	110.062	93.254	124.694	5.1938	111.052	110.667	105.181	121.061	3.83023	104.194	104.393	89.4165	122.121	4.55583	103.013	103.845	92.7794	111.801	5.11598	-0.845275	0.400563	1.33859	0.186235
al_l_ms_r	122.83	123.426	108.105	132.805	4.55914	124.141	124.868	108.074	133.432	4.84326	116.046	115.995	104.491	131.27	4.11746	115.109	114.984	105.986	127.5	4.794	-1.555	0.125509	1.13946	0.259578
al_l_orb_d_l	25.5016	25.3524	20.0673	30.8269	2.08993	25.6791	25.4206	21.4208	29.8816	1.99384	23.6098	23.6815	18.1896	29.1705	2.15631	23.916	23.8488	19.4683	29.7095	2.18199	-0.500837	0.618282	-0.798814	0.427623
al_l_orb_d_r	46.1696	46.5561	39.7079	53.9633	2.42668	46.5398	46.4951	41.7803	52.0125	2.24129	44.2119	44.3109	37.3996	51.3649	2.17351	43.9753	44.0352	39.6652	50.7978	2.16514	-0.923036	0.359521	0.620417	0.537361
al_l_orb_u_l	52.2114	52.0818	44.2443	61.1943	3.06775	52.8533	52.9009	47.5318	57.4854	2.83297	49.7205	49.5135	39.7	57.3766	2.97423	50.098	49.6728	43.2335	55.7393	3.00327	-1.26609	0.210156	-0.715395	0.477201
al_l_orb_u_r	65.1099	65.2782	56.5072	74.4886	2.94961	65.6945	66.0485	60.8454	70.5517	2.65241	62.3642	62.7695	55.5543	68.7875	2.86395	62.5798	62.7177	55.5931	70.4649	2.73377	-1.22437	0.225285	-0.443846	0.658719
al_l_po_l	101.662	101.224	90.7573	114.127	4.51287	102.254	102.469	95.144	109.158	3.27091	96.6488	96.7365	86.0323	106.189	3.81791	96.2418	96.5166	82.7476	103.976	4.09773	-0.949059	0.345492	0.571587	0.569875
al_l_po_r	116.457	116.579	104.345	126.752	4.22564	116.965	116.927	103.122	125.92	4.08447	111.387	111.42	101.441	121.109	3.79579	110.333	110.133	100.282	117.585	3.60706	-0.701186	0.48587	1.64278	0.105538
al_l_zma_l	41.0081	41.1358	31.2152	50.7684	3.30278	41.5136	41.9333	35.1134	47.2107	2.75244	38.3577	38.4305	30.58	46.0031	2.93965	38.2386	38.364	31.2865	44.6736	3.132	-1.00173	0.319994	0.218573	0.827769
al_l_zma_r	63.0106	62.7861	49.3907	72.702	3.82105	63.3462	63.5623	57.5685	72.0971	3.88358	60.34	60.3542	52.7881	70.8159	3.14201	60.0867	59.7953	52.7677	68.1375	3.41958	-0.492379	0.624296	0.427357	0.670763
al_l_zo_l	23.4238	23.3047	16.5655	29.3049	2.35708	24.2115	23.9876	18.5127	29.9924	2.63949	21.5852	21.4781	14.4867	30.7534	2.74944	21.6869	21.7886	13.2795	26.0495	2.65641	-1.72954	0.0893372	-0.215877	0.829808
al_l_zo_r	42.7123	42.3364	34.5044	52.2704	3.10018	42.9739	42.8011	36.3512	49.8568	2.80986	41.1051	40.9923	34.3167	50.6791	3.09649	41.7796	42.0899	33.7588	50.0739	3.66669	-0.517998	0.606252	-1.0753	0.287102
al_r_b	148.592	148.3	131.31	163.479	5.49585	149.088	149.3	140.05	162.311	4.81008	141.645	141.942	128.641	162.652	5.78229	141.269	141.525	131.926	154.045	5.08374	-0.569065	0.571252	0.408527	0.684221
al_r_d_l	45.7383	45.5956	38.0026	53.1581	2.94388	46.3137	46.4777	40.3653	52.7746	3.21715	42.2367	42.526	30.4883	50.4422	3.75784	43.0241	42.3269	35.9778	51.0547	3.37314	-1.03248	0.306309	-1.29623	0.19953
al_r_d_r	38.684	38.4902	29.9058	46.4097	3.04163	38.8921	39.1591	31.4093	45.7944	3.68051	34.8516	35.252	25.6939	43.1735	4.20239	35.437	34.8545	27.389	43.0538	4.0015	-0.331489	0.741596	-0.822946	0.413728
al_r_ec_l	72.7826	72.8267	64.6099	81.1378	2.94215	73.604	73.8338	67.8718	79.4289	2.84917	69.63	69.543	63.267	78.698	2.84409	70.0753	69.7257	64.011	74.954	2.49029	-1.62738	0.10885	-0.987139	0.327198
al_r_ec_r	52.9966	53.0542	45.3154	59.5001	2.55696	53.9562	53.7243	48.4653	58.1293	2.41554	50.5544	50.5166	43.9221	57.8381	2.61427	50.2612	50.3415	45.8494	56.996	2.50014	-2.23085	0.0293359	0.660152	0.511637
al_r_ft_l	85.078	85.216	72.6886	95.0291	3.81485	86.315	85.5807	81.0352	93.7669	3.35393	80.7524	80.7752	72.7795	91.2802	3.60575	81.6012	81.4584	73.9383	91.7221	3.95616	-2.03822	0.0455731	-1.23929	0.220448
al_r_ft_r	69.2265	69.2191	59.319	78.7242	3.60988	70.0339	69.7223	61.9178	78.3135	3.32554	64.669	64.8852	55.8481	75.6468	4.05801	65.0896	64.4163	55.1486	77.9152	4.50658	-1.356	0.179944	-0.540195	0.591238
al_r_ftm_l	79.2327	79.4343	69.756	88.6642	3.27653	79.9026	79.7545	74.5412	87.1378	2.90135	75.6906	75.7818	68.5755	85.7384	3.0328	75.8347	75.5624	69.7998	80.6041	2.8554	-1.27802	0.205784	-0.283176	0.777987
al_r_ftm_r	60.604	60.6714	52.0992	67.7586	2.93551	61.1537	60.9029	56.2697	67.7384	2.79376	57.6163	57.6719	49.0704	66.0114	2.90191	57.3772	57.3241	51.1737	62.6417	2.80835	-1.10672	0.272738	0.480369	0.632695
al_r_l	186.558	185.989	165.529	207.492	8.19214	187.077	186.587	175.561	206.707	7.17423	178.791	177.952	157.45	200.786	7.3159	178.901	178.607	163.859	193.066	7.53678	-0.399491	0.690828	-0.0831764	0.933998
al_r_ms_l	122.172	121.741	103.052	135.098	5.15232	122.733	122.231	115.781	132.306	4.02683	115.678	116.238	100.745	131.265	4.29763	114.832	114.592	106.974	124.615	4.76951	-0.747552	0.457134	1.02591	0.309415
al_r_ms_r	111.104	111.736	96.1209	122.509	4.82086	112.325	112.798	95.8325	120.675	4.89212	104.861	105.134	93.132	119.946	4.34966	103.848	103.231	93.3451	115.468	4.76611	-1.42152	0.160474	1.22666	0.225119
al_r_orb_d_l	46.5934	46.5323	41.3033	52.4818	2.43332	46.9904	46.7059	41.9283	53.2323	2.41552	44.6518	44.572	39.2708	51.6488	2.28532	45.0459	45.0113	39.5063	49.3377	2.32731	-0.932306	0.35495	-0.965241	0.338407
al_r_orb_d_r	25.1032	25.1295	19.027	32.1268	2.08804	25.2719	24.9704	22.4436	29.3035	1.82671	23.308	23.2348	18.1908	28.5758	2.02355	22.9959	23.0133	18.9257	28.9826	2.15402	-0.509582	0.612051	0.832511	0.408617
al_r_orb_u_l	65.0145	64.9651	56.0766	72.0608	3.05074	65.8421	65.6797	60.4329	71.2229	2.77023	62.4402	62.1179	55.6413	69.3333	2.75977	62.8293	62.6573	56.1868	68.2909	2.9511	-1.66321	0.101184	-0.758249	0.451455
al_r_orb_u_r	52.1055	52.1175	43.5879	60.0081	2.97745	52.7106	53.0438	46.2958	57.8919	2.70657	49.6253	49.2377	40.4033	57.3514	3.08865	49.8764	49.6535	42.7797	56.1555	2.82019	-1.24485	0.217753	-0.496248	0.621436
al_r_po_l	115.054	115.262	102.499	126.578	4.60316	115.682	115.779	108.125	124.407	3.67344	109.998	110.151	99.4395	120.452	3.7103	109.793	110.114	97.7487	117.536	3.74989	-0.920771	0.360267	0.311339	0.756647
al_r_po_r	103.007	103.158	91.2962	113.945	4.18551	103.363	103.023	89.7115	111.281	4.06193	98.3561	98.2443	88.6724	108.945	3.78995	97.1896	97.8133	87.6838	102.871	3.44013	-0.495491	0.62205	1.88773	0.0636186
al_r_zma_l	63.0599	63.2488	53.4819	76.018	3.66513	63.642	63.453	58.2309	70.3177	2.63102	60.0402	60.0178	53.5642	69.3205	3.18827	60.0302	60.2684	52.6478	66.5227	3.15387	-1.15599	0.251143	0.0179087	0.985772
al_r_zma_r	41.1172	41.5463	30.3483	49.6788	3.38044	41.2254	40.9004	35.4552	48.0736	3.34426	38.8974	38.9236	30.2791	46.639	2.9161	38.6194	38.2389	32.5297	46.9749	3.10273	-0.183395	0.855111	0.51482	0.608682
al_r_zo_l	43.9345	43.8748	34.6553	52.1973	3.05879	45.1805	45.1774	39.0603	52.9711	3.61085	42.458	42.5405	35.7036	53.0337	3.15605	42.6933	42.5923	35.5102	48.5983	2.94393	-2.01607	0.0488552	-0.447619	0.65598
al_r_zo_r	22.6533	22.7899	14.627	29.0725	2.39854	22.547	22.4445	17.4888	28.1858	2.20903	20.8151	20.4427	15.1921	27.4166	2.41293	21.1156	20.9879	14.9688	29.1778	2.92276	0.268752	0.788999	-0.602896	0.549176
alv_al_l	49.1277	48.9281	42.4188	56.366	2.8046	49.4232	49.6254	43.2258	54.0146	2.44734	46.2629	46.3386	40.6884	54.8312	2.58418	45.91	46.5736	36.402	51.1721	3.2792	-0.66611	0.507667	0.634967	0.528277
alv_al_r	49.1282	49.1024	42.756	55.9795	2.88894	49.5016	49.4873	44.2498	54.9602	2.44156	46.4864	46.4214	39.8012	55.4044	2.66433	46.441	47.242	37.0196	50.8628	3.03122	-0.837045	0.40551	0.0870651	0.93094
alv_b	144.373	144.54	129.348	159.734	5.0817	144.409	144.56	132.398	157.002	5.54651	137.961	137.819	126.199	151.212	5.01069	137.436	137.358	125.105	148.389	5.04644	-0.0365549	0.970971	0.592185	0.555996
alv_d_l	64.122	64.002	55.1153	76.4216	3.44336	64.2566	63.8325	56.5434	74.0976	4.05802	59.5033	59.7374	49.3843	68.3994	3.77001	60.1972	60.0471	48.996	68.5197	4.19852	-0.193837	0.847041	-0.956936	0.342784
alv_d_r	64.0469	64.1161	53.178	76.1473	3.68297	64.1372	64.3442	57.4917	75.286	4.54785	59.4197	59.3708	51.052	68.3202	3.8928	59.9612	59.4387	48.2564	72.2609	4.68398	-0.116678	0.907565	-0.677375	0.501135
alv_ec_l	72.6328	72.6963	64.7037	80.6989	2.88061	72.5564	72.5434	66.6821	79.2842	2.95619	68.8145	68.9278	62.1995	77.3121	2.75937	68.8387	68.6826	64.779	76.0429	2.25809	0.147545	0.883213	-0.0581636	0.953785
alv_ec_r	72.0244	72.0776	63.5991	79.0931	2.96942	72.6398	72.1272	65.041	81.0884	3.3564	68.7856	68.561	61.304	77.1101	2.87868	68.9369	68.3419	64.2855	75.7861	2.56483	-1.06418	0.291935	-0.327194	0.744578
alv_ft_l	86.4886	87.0923	69.8755	94.7498	4.35395	86.9287	87.3698	74.4771	96.2796	4.27217	81.7025	81.6654	74.4491	91.9091	3.41922	82.2452	81.6314	74.1027	98.1702	4.13387	-0.583001	0.56208	-0.769613	0.444978
alv_ft_r	86.2256	86.5757	71.7023	96.0623	4.21348	86.7434	86.4579	79.2055	97.9539	4.09981	81.4015	81.212	72.8789	91.6575	3.58857	82.1916	81.8219	75.5766	98.5531	4.39377	-0.713545	0.47826	-1.05603	0.295823
alv_ftm_l	80.3795	80.436	69.5665	89.4855	3.29035	80.198	80.6102	72.7838	89.705	3.53866	76.4927	76.4181	69.6842	85.4684	2.86327	76.1085	75.9634	70.0309	83.5758	2.59054	0.295264	0.768879	0.825099	0.412386
alv_ftm_r	80.1914	80.5252	70.1979	88.2498	3.24505	80.3615	80.0857	73.1884	90.8075	3.74753	76.521	76.4119	67.936	83.8846	2.98751	76.7467	76.9258	72.2344	84.0682	2.69589	-0.264198	0.792635	-0.465492	0.643159
alv_l	150.868	150.664	133.772	172.311	7.24933	150.98	148.991	138.132	167.684	6.78954	145.438	145.103	126.063	161.97	6.62948	145.667	146.694	131.047	157.464	6.75484	-0.0928174	0.926347	-0.192994	0.847634
alv_ms_l	77.9177	77.9761	62.7136	89.9494	3.76826	77.9345	77.9952	72.428	85.4465	3.39305	73.5888	73.5387	63.5807	86.9576	3.63442	72.755	72.9418	66.3044	80.3584	3.63192	-0.0275147	0.978135	1.30391	0.197316
alv_ms_r	78.5278	78.9665	65.8473	87.2494	3.58934	79.6623	79.4104	70.5504	86.171	3.58597	74.2763	74.4006	66.2325	85.1057	3.27301	73.8555	73.2333	68.543	82.2049	3.15547	-1.7969	0.0774558	0.751929	0.454998
alv_ns_l	48.2904	48.1219	41.247	57.1348	2.97952	48.6741	49.0071	40.0618	53.5846	2.74709	45.371	45.088	39.0264	53.7248	2.90067	45.0613	45.2299	37.9429	51.6305	3.4539	-0.7803	0.438141	0.52446	0.602148
alv_ns_r	48.5479	48.3536	41.5571	58.3327	3.08098	48.8562	49.1569	41.0676	54.455	2.63945	45.4982	45.3415	37.4551	53.273	2.93916	45.5829	45.8034	38.3741	52.36	3.36526	-0.641538	0.523364	-0.14636	0.884181
alv_orb_d_l	56.176	56.4428	48.0548	64.6345	2.90875	56.2651	56.6398	50.6824	63.4757	2.66363	52.8458	52.6325	45.8996	59.5573	2.55512	52.9976	52.5271	46.0797	60.3912	2.87052	-0.186565	0.852599	-0.306638	0.760282
alv_orb_d_r	55.9846	56.1633	49.2327	62.1748	2.98954	56.2567	56.2264	47.7167	63.4857	2.75971	52.7766	52.6011	44.8908	58.8929	2.67407	53.0528	52.7581	46.7643	61.093	2.89016	-0.550902	0.583654	-0.550719	0.584013
alv_orb_u_l	80.0815	80.4737	70.9775	87.4796	3.31065	80.3713	80.5945	73.086	88.6729	3.6106	76.1455	76.1861	69.0705	83.9637	2.90599	76.0078	75.5226	69.0366	84.0392	2.98108	-0.463143	0.645065	0.263708	0.792939
alv_orb_u_r	79.9992	80.2614	71.0263	87.5924	3.31645	80.5324	80.427	71.2251	89.6797	3.784	76.1933	76.2759	67.9626	82.8218	3.1211	76.433	76.0158	70.9954	83.5629	3.01566	-0.819099	0.416315	-0.448481	0.655404
alv_po_l	77.1284	77.2026	66.4856	86.2368	3.76061	77.3013	77.5865	71.5824	84.6195	3.3222	73.9012	73.8553	65.9462	81.2262	3.08546	73.6218	73.555	68.1853	79.3684	2.92659	-0.287869	0.77436	0.53657	0.5935
alv_po_r	78.3556	78.2654	68.2508	87.9657	3.62282	78.8763	78.7735	69.7861	86.5178	3.21959	75.3707	75.5628	66.6737	83.9636	3.05964	75.0095	74.4679	70.4158	80.0568	2.49552	-0.896039	0.373547	0.784882	0.435171
alv_zma_l	54.026	54.0524	47.7686	63.8783	2.89986	54.3546	54.4233	49.5905	59.6367	2.65649	51.4711	51.3003	43.4523	58.9717	2.85968	50.9609	51.0626	45.9677	56.2272	2.10936	-0.690117	0.492646	1.27487	0.20617
alv_zma_r	53.4916	53.3512	44.541	60.8786	3.15659	54.3212	53.8757	47.3953	60.9582	2.96616	51.5559	51.5371	45.5585	60.7294	2.73338	51.5669	51.3367	47.2344	57.4712	2.12393	-1.56882	0.121783	-0.0278926	0.977824
alv_zo_l	55.348	55.5283	46.5975	63.6061	3.04216	55.6734	55.9131	49.4368	63.0283	3.03878	52.2248	52.3375	44.7484	60.3865	2.67299	52.1586	51.8149	45.8084	60.8965	3.02433	-0.608157	0.545411	0.127077	0.899347
alv_zo_r	54.9308	55.1302	47.7022	61.4405	2.98507	55.3488	55.5363	47.524	61.6159	2.64373	51.8358	51.576	44.1981	58.7842	2.74124	52.3621	52.3254	45.9485	59.7192	3.01853	-0.875234	0.384668	-1.00761	0.318019
ast_l_al_l	148.187	148.295	134.437	162.687	5.76454	148.086	147.586	140.056	156.376	4.22095	139.641	138.859	126.884	154.684	4.97315	139.207	140.228	125.081	149.831	5.20632	0.125652	0.900331	0.477561	0.63478
ast_l_al_r	157.553	157.669	142.012	170.901	5.7119	157.394	157.32	149.297	166.213	4.56567	149.181	148.818	135.23	162.977	4.82022	148.972	148.212	136.058	158.811	4.87359	0.188277	0.851194	0.243627	0.80837
ast_l_alv	114.411	114.858	100.936	124.886	4.63704	113.687	113.177	106.419	123.937	3.85196	108.432	108.548	96.2417	119.986	3.98181	108.119	107.42	100.737	117.996	3.94726	1.02325	0.309774	0.44958	0.654647
ast_l_ast_r	118.517	118.482	105.413	134.543	4.91609	119.013	118.934	108.101	127.802	5.12453	114.67	114.721	101.278	128.77	4.74431	115.415	114.543	107.217	127.744	4.50555	-0.553649	0.581968	-0.929092	0.356477
ast_l_b	145.228	145.204	132.224	159.745	5.13623	145.019	145.127	132.337	160.637	5.64902	138.591	138.51	125.575	149.76	4.93216	138.652	138.488	130.46	149.07	4.37245	0.213019	0.832093	-0.0771918	0.938708
ast_l_ba	82.8396	82.698	73.5308	94.1759	3.64056	82.1134	81.7811	76.5664	89.3847	3.2991	78.2749	78.5096	70.1143	87.903	3.35372	78.3229	78.5264	68.6036	86.069	3.4662	1.22495	0.225099	-0.0791872	0.937157
ast_l_d_l	141.546	141.727	128.108	153.682	5.07924	141.077	141.252	131.453	151.451	4.44491	133.488	133.512	121.555	147.181	4.62084	133.658	133.981	121.977	145.958	4.97686	0.582195	0.562428	-0.197023	0.84452
ast_l_d_r	151.393	151.267	137.253	164.846	5.28113	151.146	150.302	141.076	164.167	4.63485	143.196	142.982	132.064	155.991	4.48413	143.296	143.724	132.008	156.459	5.38032	0.293756	0.769872	-0.108056	0.914362
ast_l_ec_l	122.756	122.823	111.065	133.635	5.02536	121.949	120.952	114.994	129.814	3.89751	115.141	114.86	105.148	129.153	4.22837	114.81	114.451	105.011	123.915	4.20519	1.10771	0.271599	0.445594	0.657511
ast_l_ec_r	163.775	163.775	146.85	174.614	4.96335	163.64	163.351	153.53	178.552	4.86387	155.844	155.67	145.725	166.558	4.1548	156.072	155.738	145.841	166.23	4.43458	0.156681	0.876022	-0.295913	0.76838
ast_l_en_ba	81.6793	81.527	72.7555	92.6827	3.59564	81.0534	80.9165	75.2759	87.9905	3.31056	77.1901	77.2783	68.8968	86.9246	3.3106	77.3112	77.2627	67.8569	85.1608	3.35653	1.05576	0.295111	-0.205358	0.838005
ast_l_foram_l	61.7712	61.5334	53.2847	72.4023	3.52737	61.2708	61.1152	54.9512	67.1905	2.94334	58.6974	58.9804	50.3334	67.2063	3.25516	58.9461	59.0436	51.4134	65.8435	3.67817	0.927415	0.356965	-0.392442	0.69626
ast_l_foram_r	87.1808	86.8027	79.2199	97.7327	3.55262	86.6286	86.4471	81.2835	93.0067	3.14392	83.4957	83.6714	75.2431	92.0619	3.48292	84.0189	84.2707	76.6571	92.018	3.68252	0.972052	0.334624	-0.815393	0.418248
ast_l_ft_l	124.557	124.458	108.966	138.96	5.6155	123.889	124.193	114.244	134.896	4.66611	117.113	116.833	107.783	128.316	4.30704	117.093	117.559	108.51	128.079	4.37927	0.779658	0.438266	0.0257274	0.979562
ast_l_ft_r	165.215	165.153	147.212	176.975	5.3158	164.968	164.691	155.212	179.059	5.20268	157.492	157.424	148.712	168.01	4.0861	158.018	157.7	145.322	170.583	4.99914	0.268253	0.789424	-0.61878	0.538754
ast_l_ftm_l	124.726	124.602	112.702	135.512	4.88323	123.935	123.465	116.03	133.162	4.3652	117.452	117.593	107.313	130.885	4.50018	116.918	116.688	107.41	125.504	4.10391	1.00561	0.318358	0.724456	0.471448
ast_l_ftm_r	167.754	168.187	150.609	179.594	4.9422	167.351	166.184	156.151	182.399	5.31236	159.646	159.468	150.434	170.134	4.16087	159.928	159.846	150.478	170.218	4.49489	0.437088	0.66372	-0.361858	0.718818
ast_l_l	86.0427	86.207	67.6667	102.41	5.87361	86.0255	84.3933	72.5877	103.3	6.78986	84.2254	83.9707	67.5652	96.7361	5.60603	85.5066	84.7583	70.1193	101.015	6.31308	0.0146888	0.988335	-1.17717	0.244226
ast_l_ms_l	54.6207	54.403	43.9714	65.7139	4.31664	54.4522	54.6602	45.6871	63.7065	4.33526	49.7882	49.705	39.0862	64.428	4.43403	50.7599	50.8355	36.3007	61.2203	5.3417	0.221072	0.8258	-1.06589	0.291343
ast_l_ms_r	127.193	127.618	114.863	138.421	4.2408	127.32	127.221	117.006	136.379	4.49478	120.444	120.308	109.62	131.537	4.34362	121.394	120.744	112.693	132.377	3.98897	-0.161135	0.872559	-1.3288	0.188698
ast_l_ns_l	153.364	153.431	139.961	168.81	5.94495	153.249	152.414	141.62	165.64	4.97157	144.754	144.527	129.905	158.472	5.27278	144.284	144.914	132.62	155.566	5.26361	0.126845	0.899435	0.507458	0.613719
ast_l_ns_r	157.503	157.419	143.123	172.48	5.95164	157.179	156.377	146.181	168.448	4.81826	148.918	148.816	134.635	163.285	5.12587	148.689	148.732	137.125	160.358	5.17174	0.363754	0.71713	0.252481	0.801551
ast_l_o	68.7076	68.9173	60.6543	76.8481	3.39463	68.042	68.3219	60.9264	75.4435	3.59433	65.9641	65.6109	57.9593	76.4006	3.34109	66.3622	66.1017	60.8445	75.2959	3.25314	1.06317	0.2922	-0.69165	0.491812
ast_l_orb_d_l	134.745	134.684	118.58	148.111	5.64814	134.466	134.277	127.047	142.683	3.93806	126.848	126.603	114.542	142.918	4.55576	126.696	126.424	114.258	138.319	5.1568	0.36619	0.715164	0.170987	0.864868
ast_l_orb_d_r	159.466	159.751	141.623	169.942	5.44961	159.325	159.157	150.837	172.071	4.84565	151.46	151.305	140.246	161.674	4.35491	151.547	151.879	139.675	162.571	4.90094	0.161474	0.872222	-0.102997	0.918342
ast_l_orb_u_l	142.369	142.479	126.991	154.077	5.28384	141.953	141.521	133.857	152.41	4.05591	133.936	133.393	123.995	146.738	4.40131	133.475	133.497	124.891	144.002	4.54219	0.546262	0.586523	0.580332	0.563946
ast_l_orb_u_r	165.9	165.955	149.518	178.268	5.35814	165.862	165.677	154.549	180.44	4.94127	157.508	157.207	147.085	167.865	4.35783	157.528	157.245	146.997	169.712	4.82967	0.0426255	0.966135	-0.0248913	0.980231
ast_l_po_l	51.0353	50.8072	38.4623	61.1703	3.58619	50.4806	50.1995	44.2965	57.4427	2.94476	47.1655	46.975	38.7572	63.0597	3.19429	47.0573	46.6071	39.2131	54.622	3.78836	1.02347	0.309632	0.167093	0.867932
ast_l_po_r	129.31	129.788	115.62	140.984	4.56651	129.44	130.378	118.193	140.686	5.20043	124.017	123.854	114.232	135.897	4.37876	124.77	124.697	115.898	132.682	4.12111	-0.145881	0.884556	-1.02517	0.309275
ast_l_zma_l	122.111	122.138	110.897	137.278	5.53752	121.986	121.028	113.529	133.552	4.8945	115.19	115.203	102.996	129.648	4.66338	114.692	114.478	106.058	124.059	4.47092	0.142205	0.887357	0.627558	0.532635
ast_l_zma_r	160.635	160.904	143.902	172.559	5.1888	160.893	160.372	152.166	174.476	4.70521	153.052	153.193	138.296	163.987	4.36986	152.993	152.453	142.382	163.275	4.40831	-0.304611	0.761655	0.0757995	0.939836
ast_l_zo_l	136.093	135.857	123.351	148.175	5.6572	135.419	134.619	126.821	143.309	3.94742	128.285	127.948	117.257	142.892	4.66635	128.035	128.328	117.308	138.628	5.03612	0.884168	0.379186	0.286033	0.775906
ast_l_zo_r	158.036	158.157	141.232	169.797	5.35572	158.202	157.699	149.907	169.157	4.78888	150.515	150.659	139.404	162.118	4.68783	151.032	150.657	136.313	162.494	5.38334	-0.191974	0.848366	-0.559294	0.578272
ast_r_al_l	157.987	158.005	144.617	171.427	5.33618	158.355	158.074	145.135	169.321	5.15814	149.822	149.711	138.927	169.654	4.99174	148.883	149.334	135.415	164.05	5.33748	-0.403419	0.68806	1.01129	0.31619
ast_r_al_r	148.485	148.397	132.688	161.98	5.52299	148.655	148.68	135.259	158.185	5.17623	140.558	140.396	127.301	160.511	5.21109	139.587	140.259	126.427	153.071	5.18188	-0.183867	0.854717	1.06336	0.291927
ast_r_alv	114.814	114.809	102.179	126.508	4.48735	114.868	114.545	104.808	124.037	4.14344	109.376	109.133	98.0463	121.422	4.19311	108.759	108.446	102.138	121.079	3.99714	-0.0736649	0.941511	0.868387	0.388572
ast_r_b	145.761	145.332	133.206	160.65	5.11358	146.788	147.558	131.88	160.431	6.18478	139.04	139.027	126.815	160.372	5.16548	138.867	139.053	127.576	146.67	4.25317	-0.973299	0.334869	0.221145	0.825629
ast_r_ba	83.4723	82.966	75.6953	97.3965	3.50248	83.7508	83.9976	76.3889	94.4468	3.77219	79.4897	79.5798	72.1296	89.7961	3.48489	79.0136	78.9042	71.2415	85.1743	3.14923	-0.425192	0.67232	0.840777	0.403606
ast_r_d_l	152.029	152.607	136.14	163.113	4.94302	152.46	152.105	143.162	166.193	5.36193	143.984	143.756	132.618	170.52	4.96444	143.736	143.613	132.986	161.348	5.1796	-0.463372	0.644895	0.274194	0.78492
ast_r_d_r	141.589	142.007	125.878	152.447	4.90257	141.583	141.344	132.789	151.91	4.95433	134.275	133.974	124.486	160.854	4.86887	133.717	133.504	123.734	148.636	5.24315	0.00657349	0.994777	0.612823	0.542465
ast_r_ec_l	164.949	165.177	150.578	176.343	4.9998	165.498	165.618	156.044	178.641	5.12395	156.929	156.763	147.184	182.13	4.75644	156.618	156.156	149.491	169.857	4.12431	-0.61147	0.543273	0.414606	0.67977
ast_r_ec_r	122.301	122.728	104.816	131.99	4.68541	121.709	122.04	114.446	133.078	4.87287	115.373	115.309	103.546	137.765	4.65395	114.739	113.77	107.131	126.072	4.10314	0.694587	0.49011	0.854859	0.395756
ast_r_en_ba	82.3241	81.9518	73.3262	95.9245	3.52079	82.7244	82.6892	75.6657	93.2233	3.74698	78.4278	78.5333	71.1916	88.5565	3.43581	78.0072	77.8428	70.5983	84.7412	3.08539	-0.6139	0.541739	0.757031	0.451798
ast_r_foram_l	87.7684	87.2488	80.1064	98.4231	3.65252	88.038	88.025	80.5842	97.5383	3.89343	84.4111	84.5808	75.4381	93.0522	3.38396	84.3472	84.9152	74.492	91.3786	3.90503	-0.398023	0.692111	0.0952632	0.924459
ast_r_foram_r	61.7856	61.5648	49.8868	71.1521	3.46765	61.7082	61.3175	54.5192	71.52	3.27707	59.163	59.1968	51.5282	67.911	3.20053	59.0358	59.3201	49.8492	64.4619	3.47461	0.132514	0.895009	0.211084	0.833589
ast_r_ft_l	165.981	165.595	149.101	181.527	5.51568	166.656	166.852	157.658	179.811	5.3684	158.429	158.022	146.354	182.337	4.71885	158.262	158.362	149.941	173.494	4.47655	-0.710116	0.480369	0.208816	0.835282
ast_r_ft_r	124.055	123.629	103.297	138.089	5.31887	123.85	124.084	114.618	138.876	5.23098	117.1	116.662	104.294	138.761	4.70786	116.919	116.64	106.063	132.101	4.97968	0.22254	0.824651	0.209186	0.83505
ast_r_ftm_l	168.592	168.737	153.409	181.185	5.04243	169.143	169.368	159.074	183.451	5.5783	160.571	160.556	149.828	186.254	4.88225	160.029	159.986	151.624	172.923	4.11411	-0.571976	0.569658	0.719682	0.474189
ast_r_ftm_r	124.351	124.682	106.021	133.678	4.56304	123.624	123.362	114.769	135.657	5.41435	117.544	117.516	105.778	137.931	4.74438	117.046	116.793	109.932	129.086	4.00039	0.784953	0.435973	0.681334	0.497977
ast_r_l	86.8365	86.416	70.6204	104.622	5.91253	88.6831	89.3976	76.1454	103.515	6.10984	85.1262	85.355	69.7436	100.401	5.58182	86.1482	86.0817	73.4257	100.546	5.25609	-1.72746	0.0894284	-1.09124	0.279401
ast_r_ms_l	127.7	127.821	114.575	139.51	4.44084	128.405	128.293	119.952	139.524	4.68231	120.943	120.485	110.84	130.89	4.19529	121.724	121.964	112.479	132.332	4.3441	-0.86385	0.391291	-1.02833	0.308088
ast_r_ms_r	54.2849	54.4853	41.0708	64.3494	4.20823	53.4542	53.6581	43.6429	63.8091	4.85217	50.2054	49.9864	35.2242	64.104	4.58861	50.5357	51.0696	39.8937	63.3812	5.06424	0.996713	0.323357	-0.377123	0.707524
ast_r_ns_l	157.807	157.578	144.368	172.175	5.52698	157.913	157.405	141.503	167.143	5.14426	149.662	149.21	137.184	166.227	5.09673	148.627	149.67	137.277	160.623	5.15952	-0.115057	0.908769	1.14236	0.257951
ast_r_ns_r	154.036	153.949	139.718	169.309	5.79471	154.126	154.097	137.826	164.618	5.35508	145.721	145.641	131.462	162.792	5.44579	145.102	145.833	132.744	158.602	5.48311	-0.0943963	0.925095	0.642137	0.523278
ast_r_o	69.4912	69.3584	60.6448	79.1638	3.55179	70.0552	69.7228	64.2479	78.9459	3.08617	67.2823	67.3664	58.723	77.6169	3.41425	67.038	67.1254	58.0922	74.057	3.33074	-1.00715	0.317537	0.414647	0.679874
ast_r_orb_d_l	160.233	160.614	144.662	172.871	5.39895	160.809	160.718	149.881	174.08	5.29968	152.452	152.296	141.081	175.041	4.83938	152.125	151.994	141.29	167.826	5.04425	-0.615954	0.540257	0.371367	0.71173
ast_r_orb_d_r	135.159	135.676	119.18	147.058	5.40959	135.055	134.062	125.48	146.02	4.92626	127.839	127.929	114.755	149.069	4.9056	127.301	127.495	117.751	139.277	4.8425	0.118034	0.906413	0.629475	0.53144
ast_r_orb_u_l	166.567	166.921	149.06	177.987	5.26009	167.186	167.237	158.347	182.728	5.30816	158.264	157.916	144.989	184.044	5.00725	157.616	157.326	148.813	173.295	4.57016	-0.663491	0.509612	0.790741	0.432042
ast_r_orb_u_r	142.55	142.917	121.502	155.256	5.23395	142.763	143.149	134.938	155.93	4.83849	134.768	134.135	123.549	159.484	4.83903	134.087	133.292	125.727	148.401	4.48979	-0.246436	0.806149	0.848356	0.399473
ast_r_po_l	129.691	130.082	114.122	144.042	5.06572	130.58	130.351	121.154	143.267	5.80389	124.565	124.17	114.951	135.948	4.57884	124.735	124.345	118.227	131.132	3.50707	-0.890304	0.377244	-0.257523	0.797485
ast_r_po_r	50.0103	50.1056	37.3207	59.6727	3.22197	49.6888	49.6551	40.663	57.584	3.21448	46.511	46.3545	33.8925	57.3723	3.71466	46.6711	46.1565	41.6068	53.0452	3.04156	0.567963	0.572207	-0.285804	0.775875
ast_r_zma_l	161.727	161.799	147.887	173.996	5.32575	162.545	161.984	152.592	172.734	5.12966	154.091	153.611	140.784	173.094	4.95434	153.321	153.312	142.457	166.833	4.80135	-0.898308	0.372566	0.904954	0.369079
ast_r_zma_r	121.798	121.894	109.555	132.672	5.13522	122.047	122.333	109.393	133.879	5.11362	115.444	115.454	100.82	131.701	5.15886	114.598	114.306	104.888	124.693	4.33765	-0.27681	0.782889	1.06702	0.289733
ast_r_zo_l	159.29	159.484	144.018	171.533	5.31783	160.229	159.803	150.419	173.854	5.58542	152.099	152.022	140.901	176.193	5.08402	151.589	151.482	138.424	168.478	5.33365	-0.964268	0.338975	0.549011	0.585135
ast_r_zo_r	136.87	137.708	120.059	148.135	5.27919	137.102	136.777	127.757	147.899	5.13881	129.617	129.338	116.63	149.847	5.01421	128.605	128.372	117.681	140.168	4.83164	-0.255277	0.799378	1.18174	0.241913
b_d_l	112.745	112.685	97.6106	127.353	4.70237	112.753	111.524	104.575	124.724	4.66175	108.936	108.639	97.5249	129.777	5.08349	107.884	107.944	99.942	115.68	3.94743	-0.0106619	0.991529	1.42702	0.157815
b_d_r	112.516	112.332	97.849	126.846	4.60348	112.793	111.314	104.745	124.518	4.77197	109.075	108.659	97.7446	128.157	5.08537	108.087	108.198	97.5041	115.556	3.9718	-0.331641	0.741363	1.33321	0.186608
b_ec_l	122.69	122.781	107.237	135.926	4.76676	123.03	122.325	114.858	136.596	4.29024	117.565	117.289	106.584	138.867	4.57409	117.01	117.322	107.71	126.243	4.31428	-0.439871	0.661509	0.721817	0.47313
b_ec_r	122.724	122.243	107.741	135.857	4.46041	123.291	122.883	114.75	138.293	4.79136	117.609	117.061	107.789	133.073	4.47605	117.19	117.009	109.914	124.365	3.69061	-0.680658	0.498878	0.617829	0.538713
b_l	118.467	118.773	99.0173	138.767	7.17998	118.128	118.72	103.577	131.143	6.71805	113.042	113.294	96.5192	135.525	6.68222	112.797	112.011	97.8025	131.302	7.17857	0.282192	0.778734	0.19662	0.844833
b_ms_l	162.584	162.92	148.974	183.141	5.73767	163.21	163.496	148.538	174.13	6.31458	153.385	153.147	138.406	167.952	5.31072	153.72	152.818	144.217	164.334	5.02883	-0.572969	0.568982	-0.374178	0.709557
b_ms_r	162.912	163.361	150.669	181.661	5.32666	164.152	164.849	146.406	177.165	6.8827	153.84	154.015	138.967	171.202	5.38231	154.117	153.429	146.209	162.992	4.60369	-1.06537	0.291753	-0.330588	0.741987
b_orb_d_l	135.277	135.341	116.456	151.397	5.05887	135.659	135.243	127.399	147.668	4.40453	130.133	129.608	118.439	153.166	4.87158	129.589	129.78	121.361	139.836	4.70858	-0.478374	0.633965	0.651609	0.517116
b_orb_d_r	135.023	134.915	113.272	150.406	5	135.737	135.876	127.566	148.542	4.84373	130.128	129.824	119.602	149.493	4.7698	129.514	129.442	120.811	138.368	4.33699	-0.832462	0.408421	0.789172	0.432943
b_orb_u_l	110.27	110.658	86.2821	124.203	5.22545	110.087	109.646	102.527	126.47	4.63945	105.079	105.297	91.8026	126.084	5.29341	104.314	104.714	94.364	112.517	4.2877	0.21761	0.828416	0.965932	0.337382
b_orb_u_r	110.162	109.979	87.2405	124.358	5.13401	110.368	109.081	101.815	126.437	4.89374	105.218	104.857	93.9109	123.926	5.08369	104.414	104.949	92.9543	113.424	4.15672	-0.23737	0.813162	1.04952	0.297555
b_po_l	135.19	135.197	124.664	149.171	4.40625	134.92	134.668	123.031	143.239	5.23723	129.882	129.956	117.568	142.732	4.18425	129.37	128.239	121.654	138.865	4.11106	0.302056	0.763792	0.704382	0.483925
b_po_r	135.791	135.825	126.377	146.348	4.00865	136.1	136.218	125.26	146.842	5.49595	130.569	130.437	119.473	143.803	4.16715	129.797	129.524	120.914	138.776	3.92225	-0.335532	0.738645	1.10375	0.273974
ba_al_l	89.5217	89.1642	79.8848	101.116	4.61521	90.1663	90.055	74.0359	103.609	4.98115	85.0079	84.9937	74.1615	99.0378	4.21056	85.0467	84.4467	76.8794	95.2026	4.86353	-0.745378	0.459153	-0.0465497	0.963044
ba_al_r	89.5437	89.347	78.9313	100.516	4.74389	90.1867	89.1705	74.3231	106.026	5.30257	85.2542	85.0956	74.6044	99.7985	4.21254	85.4578	84.9725	77.4341	95.1272	4.33687	-0.70248	0.485347	-0.268234	0.789472
ba_alv	42.3056	42.5395	34.8634	51.0332	3.3564	42.4796	41.5464	31.5942	56.1038	4.514	40.7328	40.3842	32.2761	50.0289	3.3387	40.9602	40.7306	35.6089	52.2385	3.51554	-0.229187	0.819662	-0.370919	0.712072
ba_b	141.219	141.262	126.13	155.621	5.62636	141.915	142.34	132.058	149.491	4.93095	134.374	134.547	116.785	154.738	5.59249	134.585	134.537	122.661	146.902	5.45297	-0.779621	0.438417	-0.21936	0.827111
ba_d_l	94.4013	94.6826	81.3848	105.736	4.679	95.0278	94.5308	83.0271	110.089	4.95321	88.7323	88.4265	77.0879	106.504	4.72373	89.8546	90.0883	79.4365	99.9951	5.43758	-0.726053	0.470786	-1.20134	0.234866
ba_d_r	94.2321	94.1589	81.8185	104.859	4.75607	94.8185	94.7815	82.7076	108.281	5.11718	88.7338	88.7097	77.3773	107.24	4.7369	89.6213	89.5192	78.7601	100.738	5.88174	-0.659759	0.512101	-0.887875	0.378715
ba_ec_l	95.9807	96.1348	84.7127	103.354	3.68787	96.2272	96.0498	88.7055	104.345	3.46458	90.8548	90.8867	82.9949	103.447	3.4922	91.4603	90.815	84.6359	100.22	3.83292	-0.39915	0.691155	-0.912587	0.365405
ba_ec_r	95.3469	95.3807	85.2053	103.431	3.78298	96.104	95.8643	86.8517	107.362	4.05196	90.8167	90.8713	81.1195	99.5665	3.53094	91.3853	91.2769	83.5639	100.588	3.74208	-1.07482	0.287031	-0.872584	0.386564
ba_en_ba	1.73504	1.70184	0.799971	3.64338	0.447548	1.56391	1.45831	0.78258	2.38231	0.401545	1.63524	1.59978	0.662954	7.0258	0.608361	1.59995	1.58146	0.624639	3.28534	0.50225	2.36627	0.0209912	0.382305	0.703406
ba_foram_l	26.932	27.0968	21.6789	32.7658	2.05003	26.9736	26.8722	21.9903	31.436	2.27858	25.6002	25.4238	20.478	32.4671	2.07468	25.6004	25.6465	20.563	29.9591	2.00989	-0.105787	0.916136	-0.000312318	0.999752
ba_foram_r	27.2401	27.4657	23.2762	33.0978	1.96445	27.5085	27.8727	22.6581	31.7792	2.07453	26.0064	25.9072	20.8307	32.8246	1.90526	25.7975	25.9107	22.2992	30.2084	1.79177	-0.742386	0.460906	0.654116	0.51546
ba_ft_l	105.214	105.256	88.468	114.45	4.89643	105.906	105.532	92.4385	116.758	4.27685	99.561	99.1835	91.2496	117.923	4.23054	100.674	100.063	92.8645	117.303	5.1536	-0.892243	0.375514	-1.2673	0.210665
ba_ft_r	104.869	104.887	90.2074	115.011	4.74379	105.713	105.212	98.063	119.089	4.04066	99.3243	98.8474	87.8606	117.751	4.32771	100.517	100.296	90.7228	117.619	5.43775	-1.14625	0.255753	-1.29289	0.201824
ba_ftm_l	102.118	102.184	92.3007	110.332	3.89034	102.306	102.043	94.3863	111.497	4.10387	97.0237	97.1213	87.7373	113.972	3.75648	97.3028	96.3655	90.3037	108.2	4.16181	-0.262405	0.793956	-0.388006	0.699504
ba_ftm_r	101.848	102.037	92.4829	109.886	3.88663	102.25	102.188	93.756	115.026	4.34399	97.0263	96.9337	86.502	112.189	3.82092	97.717	97.0879	89.5138	109.168	4.12638	-0.535831	0.594239	-0.964261	0.339053
ba_l	116.409	116.921	99.9474	135.103	6.71174	116.834	115.85	102.477	132.423	6.10636	112.004	112.197	94.8324	132.885	6.46824	112.598	113.208	96.5373	128.088	6.36986	-0.387479	0.699695	-0.528152	0.599349
ba_ms_l	58.105	58.2782	48.7352	67.4695	2.82251	57.9654	58.0745	51.1203	63.8665	3.11066	54.233	54.1095	48.21	62.119	2.62265	54.262	54.5687	49.4657	59.4387	2.62065	0.259291	0.796372	-0.062854	0.950095
ba_ms_r	58.6341	58.6595	50.616	65.541	2.8346	59.6024	59.4895	53.0423	66.7846	2.99964	55.1109	54.9835	49.0591	63.1559	2.74375	55.0826	54.6021	52.0089	60.4573	1.98558	-1.85308	0.0690628	0.0745955	0.940725
ba_ns_l	90.135	90.01	77.3724	103.476	4.7757	90.7652	90.3204	71.6087	105.753	5.95605	85.6622	85.4365	73.4783	99.7107	4.55806	85.6157	84.0088	77.5766	95.9465	4.93432	-0.622935	0.536068	0.0543591	0.956842
ba_ns_r	90.4145	90.2025	77.597	104.188	4.91926	90.931	90.115	72.3328	106.764	5.93955	85.8125	85.7119	73.4913	99.451	4.62343	86.1281	85.8824	78.2445	95.8056	4.77449	-0.509715	0.612386	-0.377761	0.706992
ba_o	38.4455	38.3408	31.9634	44.9657	2.69697	38.6548	38.783	32.766	43.9629	3.01435	37.0549	37.036	28.7335	43.7404	2.47145	36.7277	36.3059	33.0697	42.272	2.04298	-0.402243	0.689066	0.871541	0.386475
ba_orb_d_l	89.6337	89.7924	76.6421	99.3367	4.48744	90.1886	89.512	77.2921	102.181	4.3658	84.9395	85.0755	72.4905	100.823	4.00781	85.6001	84.3992	76.4829	97.3055	4.90676	-0.718099	0.475468	-0.790642	0.432734
ba_orb_d_r	89.5913	89.696	78.9279	99.2042	4.57051	90.2106	89.4063	77.6332	104.995	4.73074	85.0801	85.0451	74.0661	96.924	4.01075	85.6972	84.9378	76.7506	98.0836	4.47782	-0.748509	0.457193	-0.798306	0.42813
ba_orb_u_l	107.216	107.605	96.0842	115.766	4.39268	107.951	108.258	98.183	120.78	4.42116	101.68	101.73	90.4318	119.092	3.93067	102.087	101.099	95.0768	116.019	4.80366	-0.946255	0.347888	-0.49768	0.6208
ba_orb_u_r	107.146	107.489	95.8484	116.234	4.40475	108.154	108.509	97.9989	122.8	4.71765	101.864	101.752	90.194	116.749	3.96292	102.506	101.715	94.8654	116.569	4.79143	-1.22882	0.22424	-0.785849	0.435489
ba_po_l	63.076	63.2126	53.2339	73.1966	3.53914	63.4823	63.8577	57.0307	70.1036	3.51121	60.1823	60.0887	53.6495	68.9361	2.92026	60.5774	60.9254	53.8939	67.1062	2.93719	-0.656372	0.514117	-0.764896	0.447389
ba_po_r	63.9874	64.17	55.1918	74.3199	3.38156	64.9719	64.6726	58.2556	71.4137	3.31337	61.383	61.5648	52.3399	68.8305	2.93571	61.6922	61.6368	56.3079	66.4267	2.38281	-1.68111	0.097939	-0.70297	0.484395
ba_zma_l	82.6417	82.8105	71.5522	92.3697	3.9348	83.2466	83.2431	72.9213	90.9073	3.89006	78.9979	79.1488	70.8794	90.4603	3.80579	78.9917	78.0894	73.2108	89.1035	3.84452	-0.881292	0.381699	0.00917539	0.99271
ba_zma_r	82.1113	82.1327	72.8321	91.9655	4.00029	83.1817	82.5471	73.7096	96.0463	4.30755	78.9967	79.1491	70.3969	88.7302	3.72985	79.1353	79.3999	73.0993	87.7087	3.11883	-1.43084	0.158013	-0.242504	0.809115
ba_zo_l	89.4806	89.8384	77.2464	99.354	4.46892	90.094	90.0872	77.6127	101.509	4.253	85.0333	85.1345	73.0192	100.912	4.14272	85.5108	84.1493	76.2185	96.8173	4.95421	-0.811275	0.420344	-0.564068	0.575095
ba_zo_r	89.3161	89.4279	79.1872	98.9677	4.51271	90.1928	89.5878	78.4423	104.802	4.58847	84.9771	84.9461	74.6607	97.2146	4.03749	85.6666	84.7817	76.7135	97.2859	4.43165	-1.08874	0.28074	-0.898683	0.372702
d_l_d_r	25.2207	24.9938	18.8229	36.1471	2.89392	25.8838	25.4785	19.6508	36.108	3.37424	23.518	23.6668	17.6963	29.8332	2.39667	23.6831	23.7346	18.306	30.1777	2.5991	-1.14618	0.256817	-0.366211	0.715589
d_l_ec_l	40.24	40.172	35.3565	44.3771	1.77639	40.8139	40.6338	35.9811	45.4118	1.91316	38.767	38.5985	32.6126	44.2829	1.94113	39.0925	38.7091	35.7288	42.5719	1.83361	-1.72732	0.0896023	-0.997084	0.322618
d_l_ec_r	64.4239	64.3235	56.6543	72.7122	2.99465	65.7352	65.7193	60.2383	77.3485	3.32736	61.758	61.8563	55.368	71.4141	2.75158	61.9242	61.826	56.7091	69.9054	2.68633	-2.28103	0.0264346	-0.349862	0.727664
d_l_orb_d_l	29.9083	29.7937	25.7119	35.1048	2.05902	30.1881	29.9844	25.4511	35.712	2.49755	28.4921	28.6267	22.6597	33.9378	2.14169	29.1272	29.3386	24.8029	35.059	2.30559	-0.656953	0.514086	-1.58605	0.118338
d_l_orb_d_r	48.9726	48.9311	42.51	57.9834	2.66634	49.8967	50.0051	44.0726	58.7886	3.12168	46.83	46.7159	38.9816	54.6143	2.73875	47.1137	46.9872	40.8591	55.0772	2.86195	-1.72745	0.0898627	-0.56762	0.572509
d_l_orb_u_l	21.9169	21.7822	17.7603	27.7344	1.83562	22.1682	22.4468	16.8692	26.491	1.79708	22.3179	22.1447	18.1864	28.6161	2.24935	21.871	21.7947	17.7166	27.6477	2.02386	-0.791078	0.432012	1.22685	0.22436
d_l_orb_u_r	44.9802	44.9095	39.1262	54.7303	2.54839	45.6928	45.3365	40.7614	54.4491	2.75792	43.6363	43.7003	38.1684	49.6337	2.4509	43.4793	43.4047	39.4187	50.2271	2.39396	-1.48907	0.142077	0.370836	0.712062
d_r_ec_r	40.1153	40.0222	34.8554	44.4144	1.88902	40.8052	40.8601	37.0835	45.0358	1.8284	39.0018	38.9739	34.3936	43.2281	1.69772	39.0544	39.1457	35.619	43.2816	1.88962	-2.12977	0.0372629	-0.160885	0.872773
d_r_orb_d_r	29.4183	29.4147	24.7081	34.7526	2.00385	29.7126	29.5929	23.6618	34.7244	2.64013	28.104	27.9101	22.7893	33.8685	2.20245	28.3689	28.0396	24.034	33.2779	2.30576	-0.660908	0.511688	-0.658439	0.512894
d_r_orb_u_r	21.7464	21.9999	16.4168	25.8068	2.00592	21.9476	21.8577	16.573	26.0914	2.30322	22.2872	22.0747	17.4394	28.6529	2.39931	22.0159	21.8219	18.1372	28.0799	2.32026	-0.508166	0.613405	0.659928	0.5118
ec_l_d_r	64.5863	64.602	56.4671	73.8845	3.1211	65.713	65.74	59.524	76.3649	3.45782	61.5301	61.43	54.29	71.032	2.9387	61.8907	62.0809	56.3193	70.0119	2.70308	-1.88505	0.0646905	-0.744814	0.459152
ec_l_ec_r	101.322	101.767	86.206	109.878	3.78334	102.921	103.115	94.8158	114.751	3.93559	97.4973	97.8009	88.045	109.103	3.6777	97.7075	98.0182	91.4037	105.32	3.30581	-2.3254	0.0236005	-0.353091	0.725177
ec_l_orb_d_l	27.9892	28.0613	21.8991	31.3219	1.40372	28.382	28.4802	26.1585	30.6738	1.22238	27.0183	27.0525	23.2832	31.472	1.43504	27.1706	26.991	24.1962	29.812	1.22186	-1.7715	0.0810947	-0.683208	0.49682
ec_l_orb_d_r	83.8419	84.2298	71.4208	91.2538	3.309	85.0254	85.3711	77.8213	94.0131	3.54042	80.8907	81.1171	73.3822	90.2989	3.30886	81.0098	81.4122	75.006	89.0407	2.99538	-1.92263	0.0595782	-0.221193	0.825648
ec_l_orb_u_l	29.69	29.6515	24.5799	34.1358	1.57627	30.4153	30.1897	26.4587	34.1659	1.6843	28.5038	28.4523	24.2444	32.2608	1.5956	28.4535	28.3802	25.4187	32.3853	1.56248	-2.47604	0.0163063	0.18202	0.85618
ec_l_orb_u_r	84.626	84.936	72.8971	92.6596	3.30376	85.8632	86.3153	79.1976	95.6199	3.49717	81.5628	81.7419	73.7633	91.4352	3.27241	81.7585	82.2455	75.3241	90.4671	3.05407	-2.03088	0.046954	-0.359005	0.720806
ec_r_orb_d_r	28.1551	28.1736	20.3266	31.6138	1.50737	28.8904	28.8534	26.3904	31.8564	1.23808	27.5613	27.4753	24.604	31.2088	1.34218	27.5371	27.5628	25.5175	29.3075	0.972434	-3.22669	0.00191055	0.130642	0.896391
ec_r_orb_u_r	30.1304	30.2316	24.2193	36.2401	1.80711	30.952	30.5755	27.6361	34.8004	1.62641	28.931	28.7939	24.5341	32.5704	1.46815	29.0695	28.9275	26.0763	32.8868	1.55328	-2.80692	0.00661676	-0.511932	0.610681
en_ba_al_l	90.976	90.5677	81.5459	102.355	4.56262	91.4912	90.9751	75.1892	104.603	4.88303	86.358	86.2565	75.2034	100.094	4.15627	86.3485	85.9046	78.7225	96.4262	4.77712	-0.606788	0.546425	0.0115726	0.990809
en_ba_al_r	90.9975	90.6335	80.7479	101.748	4.7045	91.5133	90.4904	75.4607	107.001	5.2038	86.6056	86.3633	75.8997	100.853	4.17017	86.7562	86.2096	79.2814	96.3646	4.23472	-0.573254	0.568798	-0.202711	0.840064
en_ba_alv	43.8884	44.1237	36.6416	52.7299	3.31216	43.9104	42.9808	32.7799	57.2063	4.39954	42.2057	42.0039	33.4326	51.1716	3.27132	42.3764	42.1266	37.1902	54.4097	3.45823	-0.0296354	0.976476	-0.283185	0.778063
en_ba_b	140.781	140.744	125.518	155.267	5.6525	141.541	142.167	131.709	149.801	4.98618	133.921	133.923	116.368	154.198	5.52946	134.122	134.224	121.742	147.074	5.5197	-0.842225	0.402738	-0.207494	0.836336
en_ba_d_l	95.4024	95.6982	82.3109	106.122	4.60579	95.95	95.6625	83.883	110.74	4.89544	89.6687	89.4007	77.8426	107.092	4.63505	90.7345	91.2486	80.2735	101.214	5.35978	-0.64264	0.523049	-1.15818	0.251905
en_ba_d_r	95.2311	95.2537	82.7394	105.449	4.69382	95.7402	95.7354	83.5623	108.908	5.03639	89.675	89.8305	78.1432	107.836	4.6506	90.5045	90.6863	79.5586	102.034	5.78259	-0.581672	0.563108	-0.844156	0.40247
en_ba_ec_l	96.8353	96.973	85.423	104.614	3.65546	97.013	96.8422	89.43	104.982	3.45656	91.6351	91.7657	83.7268	103.942	3.44576	92.2048	92.0359	85.3083	101.619	3.88792	-0.288723	0.773762	-0.850286	0.39888
en_ba_ec_r	96.2043	96.2515	86.386	104.689	3.75058	96.8874	96.8891	87.5348	107.96	4.02683	91.6022	91.5108	81.8962	100.092	3.52383	92.1284	92.1934	84.1932	101.711	3.75807	-0.976307	0.333087	-0.804747	0.424335
en_ba_foram_l	25.8858	25.9931	20.5605	31.5386	1.99725	25.9994	25.7079	21.0358	30.5644	2.25914	24.6666	24.6276	19.4245	31.6029	1.99767	24.7203	24.7759	19.9934	28.8382	2.00394	-0.291804	0.771544	-0.152375	0.879411
en_ba_foram_r	26.1891	26.2685	22.1616	32.1954	1.94754	26.5407	26.9379	21.6562	31.0302	2.08419	25.0788	24.8856	20.2111	31.9359	1.82968	24.9107	24.9466	20.5723	30.2025	1.91333	-0.970352	0.336011	0.503276	0.616699
en_ba_ft_l	105.816	105.666	89.3254	115.884	4.89463	106.459	105.942	92.9212	117.115	4.30096	100.114	99.8495	91.2047	118.191	4.19291	101.191	100.652	93.8116	118.223	5.18642	-0.825986	0.411812	-1.22144	0.227444
en_ba_ft_r	105.471	105.376	90.7894	115.994	4.75404	106.274	105.873	98.3419	119.425	4.09895	99.8883	99.412	88.5615	118.021	4.32148	101.037	100.85	91.1595	118.537	5.46858	-1.07686	0.28543	-1.23918	0.220922
en_ba_ftm_l	102.881	103.035	92.903	111.14	3.86801	103.012	103.065	95.1076	112.013	4.0827	97.714	98.0323	88.3096	114.361	3.73439	97.9627	96.9758	90.8548	108.924	4.1955	-0.184615	0.854187	-0.343768	0.732337
en_ba_ftm_r	102.609	102.754	93.1747	110.235	3.86525	102.953	102.675	94.46	115.504	4.313	97.7219	97.7213	87.1378	112.587	3.8022	98.3736	97.918	90.1193	109.918	4.13522	-0.46158	0.646204	-0.908945	0.367285
en_ba_l	114.846	115.397	98.2987	134.048	6.76024	115.427	114.653	101.152	131.416	6.22287	110.513	110.589	93.452	131.057	6.51851	111.18	111.79	94.6666	124.808	6.26566	-0.521241	0.604027	-0.599774	0.550882
en_ba_ms_l	57.9384	58.1418	48.8003	67.474	2.80911	57.799	57.9178	51.2639	63.6005	3.06173	54.0558	53.9312	47.9944	62.3043	2.60525	54.1521	54.3627	49.4727	59.4901	2.60285	0.262581	0.793841	-0.21023	0.83421
en_ba_ms_r	58.4622	58.4864	50.635	65.1602	2.82317	59.4207	59.1323	52.9052	66.7534	2.97228	54.9488	54.7413	48.8528	63.0504	2.72728	54.96	54.5557	51.9823	60.0268	1.93566	-1.84949	0.0695695	-0.029973	0.976163
en_ba_ns_l	91.6726	91.4037	79.331	104.799	4.71841	92.1609	91.2435	72.7904	106.804	5.87203	87.0981	87.0787	75.2608	100.831	4.49971	86.9995	85.363	79.4146	97.2511	4.8254	-0.489486	0.626568	0.117546	0.906845
en_ba_ns_r	91.9506	91.8633	79.5291	105.499	4.86603	92.3272	91.0448	73.5089	107.809	5.84952	87.2497	87.1934	75.1536	100.572	4.56586	87.5093	87.1611	79.8475	97.1153	4.6673	-0.377153	0.707576	-0.317309	0.752145
en_ba_o	37.0298	36.9703	30.7452	43.8845	2.66619	37.3479	37.386	31.7838	42.8268	2.93932	35.7764	35.8584	28.0722	42.6522	2.3552	35.4874	35.449	31.7615	40.8852	2.11514	-0.625598	0.534148	0.758886	0.450695
en_ba_orb_d_l	90.8481	90.9267	77.8208	100.196	4.43408	91.3001	90.8306	78.2782	103.043	4.31497	86.0707	86.2958	73.3477	101.611	3.9507	86.6839	85.41	78.0944	98.3725	4.86711	-0.591851	0.556162	-0.740564	0.46229
en_ba_orb_d_r	90.808	90.9202	80.3075	100.32	4.51861	91.3251	90.6479	78.6051	105.831	4.68421	86.2182	86.3399	74.938	97.7393	3.967	86.7829	86.1105	78.2254	99.179	4.41433	-0.631273	0.530357	-0.740647	0.462054
en_ba_orb_u_l	108.09	108.357	97.4378	116.538	4.326	108.756	108.985	98.9745	121.355	4.33878	102.467	102.582	91.1635	119.58	3.87495	102.833	101.724	95.6844	116.838	4.81101	-0.873492	0.385937	-0.448402	0.655735
en_ba_orb_u_r	108.019	108.517	97.1337	117.377	4.35721	108.961	109.224	98.7674	123.358	4.65686	102.658	102.581	90.9579	117.261	3.91993	103.253	102.501	95.6427	117.423	4.77981	-1.1629	0.24976	-0.730696	0.468228
en_ba_po_l	62.8599	63.0747	52.8068	73.1464	3.54351	63.2825	63.7016	56.8465	69.6165	3.5351	59.9679	59.8467	53.5272	68.6016	2.90461	60.3857	60.6794	53.7172	67.0814	2.93622	-0.678788	0.499916	-0.80998	0.421225
en_ba_po_r	63.7542	63.8968	54.9664	74.2259	3.40424	64.7678	64.4517	58.0779	71.1453	3.32555	61.1629	61.3874	52.2941	68.8254	2.93527	61.4927	61.5379	56.1855	66.1829	2.36988	-1.72358	0.0899219	-0.752826	0.454054
en_ba_zma_l	83.8868	84.0047	73.2338	93.8748	3.92918	84.3764	84.7875	73.8492	91.8359	3.90481	80.1506	80.27	71.6856	91.3405	3.77407	80.1077	79.1289	74.5112	91.131	3.82234	-0.711488	0.479568	0.0639735	0.949209
en_ba_zma_r	83.3596	83.2014	73.9457	93.842	4.00283	84.3176	83.8376	74.557	96.9123	4.28193	80.1529	80.4004	71.5223	90.094	3.736	80.2448	80.3455	74.6116	89.6996	3.12117	-1.28662	0.203477	-0.160611	0.872873
en_ba_zo_l	90.7085	91.107	78.4665	100.346	4.41795	91.215	91.0093	78.6048	102.366	4.2289	86.1856	86.3817	73.8942	101.708	4.06564	86.6143	85.1149	77.8336	97.8984	4.90318	-0.674476	0.502554	-0.512367	0.610541
en_ba_zo_r	90.5468	90.6516	80.5892	100.101	4.46424	91.3225	90.8111	79.4302	105.637	4.54189	86.135	86.1965	75.5697	98.0319	3.98332	86.767	85.9658	77.8571	98.4012	4.36014	-0.973298	0.334419	-0.836811	0.406279
eu_l_al_l	135.181	135.094	119.047	153.043	7.585	134.26	133.891	124.028	145.616	5.09315	127.941	127.81	112.447	151.904	6.81387	128.425	128.538	113.204	143.973	6.14535	0.924551	0.357794	-0.438541	0.66247
eu_l_al_r	147.864	147.195	133.136	163.145	7.0753	147.063	146.497	136.67	156.062	4.86386	140.701	140.539	125.58	162.982	6.49769	141.271	140.73	128.161	153.018	5.48185	0.848483	0.398595	-0.56966	0.57079
eu_l_alv	119.479	118.727	103.857	137.418	6.80534	118.429	119.195	106.228	132.746	5.89482	113.622	113.199	101.856	132.695	6.02565	113.495	113.504	101.325	127.733	6.16634	0.980763	0.330276	0.117419	0.906933
eu_l_ast_l	61.1544	61.1042	33.3068	79.7776	8.24734	62.1379	62.4311	41.2397	83.2395	9.45772	56.6699	56.5947	35.6396	91.3881	7.35278	55.4863	55.1409	42.1731	70.6553	6.71731	-0.604917	0.547764	0.982316	0.32968
eu_l_ast_r	146.225	146.496	131.55	159.817	5.70034	147.412	147.662	132.734	162.568	6.66092	140.399	140.425	125.762	168.794	5.61008	140.4	140.682	129.127	150.026	3.92039	-1.03882	0.303562	-0.00201835	0.998394
eu_l_b	105.534	105.148	86.3433	122.313	7.14056	104.673	104.434	88.2864	121.185	7.66237	102.38	102.354	85.173	120.36	5.93525	102.938	102.668	92.2548	115.591	5.97879	0.646508	0.520576	-0.530806	0.597552
eu_l_ba	104.707	104.424	89.2438	120.939	6.47703	104.568	103.606	93.1018	115.575	6.58708	99.0497	98.5484	84.7098	121.418	5.70108	99.117	98.2377	87.2652	114.691	6.18285	0.119855	0.905009	-0.062726	0.950208
eu_l_d_l	116.005	115.964	101.139	133.484	6.5649	114.397	113.143	105.655	128.598	5.387	110.946	110.811	92.9773	129.684	6.44028	111.671	111.486	99.9343	126.642	5.26851	1.62197	0.10933	-0.746813	0.457684
eu_l_d_r	130.798	130.737	116.964	144.592	6.08372	129.788	128.738	121.514	141.019	4.95854	125.218	125.897	110.886	142.57	5.88887	125.917	126.128	114.301	136.704	5.03727	1.10493	0.272971	-0.762106	0.44867
eu_l_ec_l	93.1116	92.9102	79.2392	110.419	7.53992	91.2353	89.9267	83.6767	104.389	5.3511	88.112	88.2326	71.3753	107.666	6.88303	88.6629	87.5429	74.2516	101.766	5.38831	1.82565	0.0716057	-0.548294	0.585167
eu_l_ec_r	153.483	153.519	140.755	164.432	5.3362	153.01	152.875	144.422	164.56	4.6138	147.163	147.364	133.729	159.889	5.28932	147.857	147.986	134.305	157.647	4.4933	0.563776	0.574806	-0.846569	0.400229
eu_l_en_ba	104.056	103.876	88.1683	120.08	6.41767	104.007	103.318	92.5401	115.32	6.557	98.4161	97.7603	84.4215	120.172	5.6341	98.5023	97.8529	86.7133	114.33	6.16231	0.0426763	0.966106	-0.0807953	0.935895
eu_l_eu_r	148.236	148.201	134.177	164.146	6.45404	149.523	150.653	133.086	161.003	7.71285	143.882	144.173	128.495	158.142	5.88976	144.571	144.7	126.993	153.389	5.29943	-0.976986	0.333029	-0.721823	0.473025
eu_l_foram_l	97.1034	97.4676	78.67	114.81	7.23532	97.4218	97.0524	79.5528	115.732	8.16487	92.0654	91.317	77.7283	121.64	6.2766	91.9771	90.9686	81.0119	107.475	6.17169	-0.226217	0.821878	0.0809911	0.935719
eu_l_foram_r	119.066	119.172	102.49	134.458	6.01184	119.268	119.121	107.043	135.292	6.56225	113.542	113.237	97.895	140.487	5.78479	113.601	113.324	102.609	128.966	5.49934	-0.178257	0.859168	-0.0608285	0.951693
eu_l_ft_l	85.7464	85.4013	67.9018	101.09	7.13692	83.3674	82.3378	74.1181	100.148	5.86081	81.7526	81.9906	62.0475	101.251	6.71435	82.4417	82.1663	70.7429	94.7253	4.93179	2.20535	0.0307372	-0.73543	0.464292
eu_l_ft_r	149.229	149.75	132.447	160.709	5.2075	148.393	148.616	139.099	163.229	5.31745	143.869	143.82	130.198	156.252	4.95678	144.685	144.565	128.973	155.556	4.83636	0.896748	0.373544	-0.953093	0.344354
eu_l_ftm_l	90.7287	89.9664	76.7495	107.863	7.15147	88.8061	87.3441	80.2467	102.796	5.66924	86.1431	86.164	69.3562	106.423	7.0115	86.7626	86.3327	74.4367	99.809	5.3905	1.82502	0.0721488	-0.613153	0.541651
eu_l_ftm_r	155.301	155.245	142.599	166.927	5.19024	154.626	154.424	144.961	168.327	4.94255	148.843	149.23	135.635	162.559	5.12825	149.56	150.23	134.545	159.32	4.64198	0.768746	0.444995	-0.859598	0.393226
eu_l_l	102.493	102.258	87.3169	116.88	5.24731	103.02	103.409	91.0155	111.936	4.88165	98.9778	98.9348	87.1782	138.101	5.44805	98.9201	98.9065	90.7009	107.643	4.59644	-0.604516	0.547691	0.0685843	0.945522
eu_l_ms_l	84.4538	84.0138	62.2582	108.762	9.32827	84.8877	85.2758	57.7257	104.718	9.96212	77.8956	77.4626	59.5083	100.875	7.5665	77.8488	77.54	63.7771	95.5564	7.85565	-0.250435	0.803159	0.0340598	0.972947
eu_l_ms_r	154.135	154.717	139.061	169.119	5.99643	154.951	155.73	140.78	172.664	6.9724	145.509	144.605	130.656	167.311	5.7548	145.975	146.263	136.154	157.429	4.94886	-0.681962	0.498197	-0.517426	0.606571
eu_l_ns_l	143.847	143.928	126.299	161.766	7.73244	142.868	142.929	129.364	154.974	5.84133	136.464	135.845	120.31	159.922	7.07131	136.809	135.647	119.956	153.717	6.66884	0.889727	0.376439	-0.290263	0.772587
eu_l_ns_r	149.152	148.382	134.077	165.527	7.52572	148.098	147.976	135.149	158.977	5.18576	141.917	141.279	126.468	165.527	6.69179	142.375	142.023	127.892	156.017	5.96376	1.04863	0.297383	-0.426337	0.671278
eu_l_o	110.2	110.456	90.8199	125.762	6.61681	110.545	111.304	97.3643	127.005	7.54646	105.201	104.623	90.76	138.958	6.00409	104.725	104.532	93.7856	119.196	5.29885	-0.265674	0.791497	0.496394	0.621285
eu_l_orb_d_l	114.61	114.282	99.0498	132.514	7.4452	113.413	111.989	103.843	124.89	5.11135	108.991	108.244	92.5175	129.26	6.75144	109.578	108.645	94.609	124.415	6.08329	1.2065	0.231027	-0.535545	0.594126
eu_l_orb_d_r	149.178	149.121	136.771	160.427	6.05613	148.574	147.943	139.079	159.723	4.73462	143.018	142.841	130.194	159.692	5.654	143.574	143.746	130.297	152.794	5.01478	0.683966	0.496164	-0.613511	0.541681
eu_l_orb_u_l	108.974	108.247	92.1061	128.369	7.21896	107.137	105.8	99.3201	120.169	5.56498	103.23	103.605	85.7744	125.291	6.73938	103.809	103.015	91.1382	116.347	5.32769	1.76248	0.0821194	-0.584404	0.560772
eu_l_orb_u_r	144.929	144.72	129.486	158.379	5.83466	144.035	143.524	134.992	157.393	4.91043	138.778	139.045	123.9	154.566	5.63289	139.458	140.187	127.512	148.385	4.77933	0.994609	0.323452	-0.779521	0.438397
eu_l_po_l	56.1308	56.0252	39.0447	75.0961	7.54343	55.3115	53.3046	38.3347	72.5964	7.38191	52.7514	52.4571	36.2729	77.6183	6.8816	51.9136	50.5739	41.1381	66.831	6.74832	0.627797	0.532516	0.702527	0.485068
eu_l_po_r	144.852	144.65	127.198	158.564	5.83408	145.014	145.841	133.044	159.532	6.35936	139.274	139.327	126.329	153.357	5.33195	139.346	138.229	126.303	151.473	4.57368	-0.147594	0.883196	-0.0867259	0.931149
eu_l_ra_l	54.1029	53.2267	36.33	73.1211	7.42982	53.3155	52.6914	39.6696	70.6767	7.00614	52.2544	51.4273	33.2094	82.0889	7.26495	51.7155	52.1741	38.386	68.9377	6.63714	0.630879	0.530446	0.452666	0.652335
eu_l_ra_r	149.483	149.549	133.53	162.771	5.41956	149.67	149.942	138.995	162.928	5.87951	143.19	143.126	130.457	158.76	5.23082	143.4	142.444	129.198	153.244	4.62182	-0.183991	0.854686	-0.251619	0.802127
eu_l_zma_l	110.756	110.47	95.2157	132.13	8.00783	109.887	109.435	99.8837	123.8	5.79253	104.535	103.84	88.0007	127.809	6.81267	104.897	104.002	90.2354	120.866	6.6086	0.78546	0.434534	-0.309852	0.757739
eu_l_zma_r	161.389	161.056	147.719	175.503	6.43078	161.235	160.783	151.79	176.23	5.5019	154.059	154.229	142.353	171.086	5.70898	154.478	153.481	144.034	167.363	5.30709	0.153826	0.878209	-0.442272	0.659819
eu_l_zo_l	116.211	115.98	100.997	133.92	7.48868	114.614	113.745	104.957	126.862	5.1737	110.804	109.998	94.0505	129.152	6.82431	111.379	109.831	97.4475	127.578	5.84334	1.59304	0.11495	-0.540953	0.590335
eu_l_zo_r	146.839	146.554	134.299	160.309	5.93692	146.494	145.642	137.999	159.777	4.83276	141.425	141.452	125.59	161.983	6.15493	142.729	142.212	130.299	155.766	5.61773	0.387417	0.699621	-1.29395	0.200375
eu_l_zy_l	70.1303	69.6373	55.7229	91.1874	7.57967	69.0175	69.6144	56.2211	84.2891	6.20471	66.2982	65.9333	52.0119	91.0528	6.9111	65.7407	63.2507	52.0168	83.9457	7.31109	0.973567	0.333635	0.437649	0.663299
eu_l_zy_r	158.38	158.4	143.727	171.145	5.33617	158.433	158.194	148.664	172.544	5.12483	150.673	150.764	139.58	164.523	4.88588	151.123	151.387	138.005	163.05	4.79358	-0.0582708	0.953724	-0.5318	0.59683
eu_r_al_l	148.614	148.032	134.813	168.399	6.64952	149.073	149.243	136.515	161.313	5.35495	141.729	141.379	128.234	161.823	5.91796	141.424	140.511	128.948	152.248	5.25528	-0.463463	0.644453	0.321565	0.748816
eu_r_al_r	135.746	135.142	117.624	157.056	7.46598	135.983	136.069	122.504	146.212	5.60331	129.12	128.279	113.641	148.246	6.33638	128.726	127.675	117.728	141.525	5.66231	-0.224396	0.823051	0.385469	0.701158
eu_r_alv	120.144	119.392	105.179	141.899	6.65565	120.812	121.199	107.405	133.575	6.28587	114.823	114.664	103.477	136.637	5.57378	114.482	114.341	103.575	124.619	5.3988	-0.597571	0.552313	0.356764	0.722509
eu_r_ast_l	146.071	146.21	131.068	157.12	5.26706	147.549	148.071	132.761	161.698	6.44426	140.696	139.932	126.799	157.074	4.9246	141.095	141.223	130.95	146.472	3.52111	-1.34682	0.183861	-0.591197	0.556055
eu_r_ast_r	61.419	61.8264	35.6037	81.5114	8.92034	63.029	63.1619	43.0454	84.7486	9.80162	56.9896	56.8571	31.4862	104.61	7.92555	55.8829	55.8801	40.5552	74.1048	6.58823	-0.948996	0.346737	0.915462	0.363148
eu_r_b	106.129	105.265	81.9853	123.952	6.81601	106.696	107.027	92.2523	126.244	7.55712	103.278	103.418	90.4516	116.358	5.64948	103.527	103.751	89.274	115.174	6.17219	-0.433854	0.666086	-0.233231	0.816437
eu_r_ba	105.435	104.849	88.1784	126.143	6.6041	107.138	106.321	92.7421	121.172	7.32486	100.415	99.7761	90.232	118.005	5.35089	100.253	99.7186	91.6778	111.56	5.29698	-1.345	0.184127	0.173611	0.86276
eu_r_d_l	131.643	131.083	121.171	149.669	5.76545	131.927	131.536	122.212	146.835	5.08702	126.351	126.951	112.409	141.864	5.2795	126.512	126.31	118.971	134.774	4.26854	-0.308259	0.758867	-0.203797	0.839098
eu_r_d_r	116.273	116.466	102.716	134.014	6.27172	115.906	115.211	105.293	130.865	5.57402	112.107	112.228	93.6242	130.63	5.92219	112.057	111.78	103.188	124.742	4.65607	0.365081	0.716239	0.0582269	0.953728
eu_r_ec_l	154.615	154.443	144.043	165.933	4.88916	155.538	155.237	144.653	168.486	5.01098	148.501	148.693	137.261	162.354	4.79225	148.746	149.321	138.097	155.209	3.65892	-1.05131	0.297471	-0.356835	0.722222
eu_r_ec_r	93.2198	92.241	75.1394	116.479	7.6887	92.0745	90.791	81.5132	107.442	5.82281	88.5885	88.2091	71.5885	110.615	6.70243	88.6636	88.5581	75.5577	99.1122	5.0056	1.04485	0.299437	-0.0793807	0.936937
eu_r_en_ba	104.785	104.064	87.4544	125.344	6.55648	106.587	105.812	92.4067	120.58	7.27774	99.7973	99.2133	89.8445	116.717	5.30051	99.6472	99.0839	90.9068	111.051	5.27785	-1.43229	0.157704	0.161384	0.87234
eu_r_foram_l	119.732	119.496	103.84	139.856	5.8608	121.497	120.645	108.009	134.27	7.12091	114.678	114.183	101.966	138.464	5.43199	114.599	113.969	104.803	125.887	5.12472	-1.45398	0.151921	0.0862491	0.931547
eu_r_foram_r	97.2065	96.9255	78.3366	115.772	7.03353	98.8195	98.4472	83.0576	117.042	8.46498	92.5844	91.9231	79.7618	118.582	6.05647	92.3192	91.7707	80.3444	104.447	5.66833	-1.11636	0.26934	0.262236	0.794006
eu_r_ft_l	149.792	149.69	135.886	160.201	4.61496	150.432	151.374	137.95	164.04	5.2256	144.886	144.738	129.957	156.781	4.56993	145.048	145.498	133.082	149.437	3.48188	-0.710616	0.480353	-0.247278	0.80537
eu_r_ft_r	85.6433	85.9552	64.4687	103.26	7.23412	84.4207	83.8034	73.3143	106.715	6.3824	82.1704	82.5191	58.5647	105.65	6.48177	82.4576	82.4276	73.804	90.9504	4.5085	1.05942	0.293314	-0.329492	0.74262
eu_r_ftm_l	156.095	156.169	145.874	167.203	4.70842	156.994	157.315	144.236	171.284	5.17353	149.932	149.688	138.059	162.397	4.63193	150.104	150.504	139.508	156.337	3.60445	-1.00419	0.319647	-0.255506	0.799048
eu_r_ftm_r	90.6963	90.228	70.5301	111.46	7.46645	89.4411	87.9518	81.4966	108.506	6.10056	86.4835	86.4293	69.0182	109.386	6.73833	86.6488	86.5523	76.6726	96.4845	4.84024	1.11632	0.268108	-0.178483	0.858798
eu_r_l	103.089	103.005	90.601	116.795	5.30462	105.257	105.805	92.7609	113.237	5.24811	100.267	100.467	87.2316	135.919	5.33114	100.318	100.771	89.8157	108.519	4.59012	-2.3426	0.0225085	-0.0606307	0.951835
eu_r_ms_l	154.562	154.038	138.141	172.712	6.05349	156.452	157.083	144.089	170.572	7.31781	146.227	146.232	132.335	165.97	5.54341	146.641	147.403	138.331	156.29	4.13202	-1.51447	0.135904	-0.529918	0.597703
eu_r_ms_r	84.866	84.5123	61.3119	110.08	9.53149	86.069	84.8984	60.2237	107.826	10.2803	78.5127	78.4105	63.9186	103.988	7.46388	78.1299	78.5913	62.8448	93.0762	7.56241	-0.674006	0.503073	0.288306	0.77413
eu_r_ns_l	149.926	149.423	133.409	169.726	7.11509	150.05	149.821	134.549	161.9	5.39734	143.033	142.532	129.668	163.273	6.08789	142.569	142.948	128.367	156.149	5.75481	-0.122312	0.902978	0.452837	0.652255
eu_r_ns_r	144.726	144.097	128.811	164.637	7.59555	144.888	145.495	129.078	155.007	5.73814	137.74	137.162	122.354	158.447	6.71124	137.682	137.199	124.861	150.225	6.39536	-0.150271	0.880951	0.0511985	0.959334
eu_r_o	110.908	111.21	92.1875	131.56	6.7858	112.988	113.056	98.4783	127.869	8.00513	106.513	106.201	92.9898	137.193	6.00046	105.833	105.935	94.5998	115.45	4.67832	-1.51804	0.134923	0.7786	0.438728
eu_r_orb_d_l	150.318	150.029	140.046	167.254	5.78311	151.086	150.432	141.344	164.384	5.0891	144.44	144.41	133.558	161.523	5.18489	144.627	144.512	135.823	152.221	4.33138	-0.833534	0.407578	-0.235792	0.814298
eu_r_orb_d_r	115.342	114.731	97.2985	137.826	7.52282	115.15	113.375	104.022	129.833	5.66223	110.246	109.961	94.8888	132.241	6.49325	110.238	109.217	97.3107	122.407	5.28067	0.180385	0.857332	0.00805952	0.993592
eu_r_orb_u_l	145.793	145.705	133.823	161.561	5.51649	146.188	145.853	136.126	160.264	4.91739	139.928	140.514	126.543	152.222	5.14787	140.044	140.526	130.887	145.594	3.92861	-0.445981	0.6571	-0.158071	0.874827
eu_r_orb_u_r	109.42	108.54	92.6729	130.074	7.33403	108.828	107.936	100.713	125.527	5.89665	104.338	104.558	84.9441	123.724	6.42538	104.409	104.371	93.1211	114.755	4.92698	0.542745	0.589006	-0.077537	0.938405
eu_r_po_l	144.849	144.443	126.791	160.919	6.16122	146.426	145.383	131.962	161.5	7.0441	139.754	139.832	128.365	154.892	5.20851	139.731	139.314	126.751	147.067	3.64708	-1.30225	0.198339	0.0336362	0.973249
eu_r_po_r	56.1734	55.4007	39.2204	78.5833	7.85174	56.4034	55.4456	38.1644	73.7556	8.11192	53.0468	52.2335	38.6566	74.456	6.63224	51.8875	51.2101	41.5412	64.3621	6.35665	-0.162021	0.871855	1.02725	0.308357
eu_r_ra_l	149.769	149.517	135.055	164.464	5.51314	151.222	150.768	139.12	165.094	6.50139	144.125	143.963	131.629	159.153	5.12965	143.956	143.583	131.369	149.864	3.51218	-1.30569	0.197274	0.248718	0.804187
eu_r_ra_r	54.8029	53.9343	37.5988	75.5741	7.5568	55.4255	54.1691	39.6391	72.5875	7.3826	53.1358	52.3218	38.7846	85.676	7.04726	52.3293	52.6298	39.18	64.2947	6.13743	-0.476936	0.635136	0.72458	0.471272
eu_r_zma_l	162.525	161.684	149.671	178.528	6.11887	163.755	162.742	153.75	174.425	5.91838	155.229	154.945	140.803	176.366	5.41852	154.961	154.934	146.193	165.212	4.75972	-1.17282	0.245457	0.310991	0.756795
eu_r_zma_r	111.053	110.184	94.768	136.883	8.11729	111.382	111.271	94.7475	126.837	6.5405	105.113	104.235	86.4862	126.723	6.83584	104.912	104.14	92.9269	118.484	5.88692	-0.271489	0.786804	0.187566	0.851787
eu_r_zo_l	148.777	148.503	136.226	167.258	5.87904	150.159	150.879	140.084	166.047	5.81627	143.746	143.443	131.1	162.773	5.50319	143.767	144.315	135.021	153.395	4.77932	-1.34709	0.183052	-0.0239412	0.980972
eu_r_zo_r	117.305	116.584	101.156	138.873	7.4474	117.468	116.171	106.525	132.099	5.62276	112.429	112.288	96.5175	130.304	6.47936	111.927	111.643	99.852	127.494	5.60576	-0.153536	0.878385	0.492667	0.623874
eu_r_zy_l	159.07	158.937	146.054	172.672	5.39819	160.536	159.362	151.711	171.307	5.8619	151.881	151.528	142.076	170.606	4.81949	151.707	151.706	141.079	160.315	3.93957	-1.44153	0.155014	0.240223	0.810861
eu_r_zy_r	70.0429	69.5433	55.3239	96.3903	8.01284	69.8627	70.0168	54.2797	84.6007	6.76517	66.8165	66.2731	55.4577	96.5282	6.57973	66.1495	65.1949	54.0041	78.5932	6.39592	0.145764	0.88454	0.589172	0.557944
foram_l_al_l	110.045	109.815	97.8722	123.107	5.26001	110.948	110.485	97.999	121.286	5.28558	104.284	104.185	89.8794	119.156	4.73432	104.4	103.919	94.2642	116.453	5.34668	-0.970563	0.335734	-0.126253	0.899996
foram_l_al_r	113.564	113.42	101.206	125.834	5.24947	114.385	113.416	101.488	125.301	5.21461	107.947	107.578	92.4727	123.575	4.59243	108.216	107.934	99.3443	120.604	4.90848	-0.892848	0.375541	-0.314718	0.754136
foram_l_alv	65.1601	65.1741	56.2573	76.008	3.89222	65.5826	65.1567	57.3729	75.3331	4.58894	62.1391	61.6019	52.4888	73.1693	3.77485	62.421	62.5681	54.8001	72.1017	3.83049	-0.537781	0.59297	-0.41926	0.676561
foram_l_b	150.968	151.192	135.948	164.311	5.22366	151.557	151.15	140.462	159.27	4.7127	144.375	144.543	130.523	165.847	5.1759	144.653	144.216	135.512	157.18	5.49129	-0.693971	0.490211	-0.290063	0.772825
foram_l_d_l	114.303	114.395	101.21	129.426	4.86841	115.005	114.567	105.003	125.45	5.25178	107.821	107.798	95.6183	127.919	4.92901	108.955	110.033	95.3002	120.258	5.99843	-0.769844	0.44462	-1.10948	0.272299
foram_l_d_r	117.579	117.556	104.975	131.599	4.84068	118.252	118.47	109.554	129.929	5.55145	111.111	111.033	97.9432	130.702	4.89623	111.998	112.185	98.4462	124.661	6.36845	-0.705247	0.483683	-0.824589	0.413477
foram_l_ec_l	107.897	107.979	95.8049	117.421	4.14535	108.226	107.641	100.552	117.923	4.2195	102.106	101.982	89.9367	120.964	4.05348	102.751	102.637	95.4014	111.056	3.96029	-0.444753	0.658143	-0.921103	0.360677
foram_l_ec_r	121.392	121.61	108.678	130.554	3.99589	122.115	122.147	113.455	133.061	4.13414	115.719	115.524	105.518	130.905	3.91557	116.288	116.22	107.235	128.143	4.31141	-0.999284	0.321828	-0.761991	0.449296
foram_l_foram_r	32.4266	32.0585	26.6036	39.9222	2.42763	32.4264	32.1012	27.9724	37.5355	2.55802	31.2387	31.1421	25.1026	36.9829	2.36025	31.2987	31.1173	24.3267	38.4919	2.6766	0.000465407	0.99963	-0.130078	0.896984
foram_l_ft_l	116.679	116.373	99.3635	128.239	5.32364	117.374	117.347	104.553	128.181	4.7373	110.513	110.372	100.728	128.577	4.50273	111.635	111.651	100.439	127.942	5.4892	-0.812774	0.419325	-1.19967	0.235676
foram_l_ft_r	129.421	129.285	112.813	141.841	4.99301	130.149	129.386	118.008	138.75	4.22202	123.082	123.039	112.144	140.145	4.51711	124.232	123.587	111.599	140.353	6.0031	-0.94456	0.348242	-1.13658	0.261122
foram_l_ftm_l	113.492	113.74	102.305	122.265	4.28785	113.757	112.688	104.99	125.505	5.01615	107.898	107.993	96.5243	126.488	4.25748	108.208	107.346	99.4362	119.656	4.49108	-0.308843	0.758641	-0.39647	0.693239
foram_l_ftm_r	127.497	127.413	116.213	137.066	4.10997	127.855	127.634	118.698	139.729	4.56021	121.594	121.496	110.774	136.184	4.0443	122.282	121.736	111.792	136.336	4.88673	-0.454157	0.651498	-0.825444	0.412854
foram_l_l	107.469	107.608	90.7852	121.16	6.41117	107.758	107.617	97.1137	119.987	5.56894	104.265	104.014	88.7368	120.574	6.16578	105.059	105.398	87.5722	121.811	6.283	-0.285577	0.776095	-0.719826	0.474506
foram_l_ms_l	41.6443	41.7338	32.31	49.4889	2.70461	41.8298	41.7316	36.8751	51.5584	2.97888	38.377	38.365	32.1189	43.6931	2.50547	39.154	38.715	34.1204	46.2927	2.59922	-0.359931	0.720267	-1.70983	0.0926785
foram_l_ms_r	73.1935	73.1174	64.6523	81.0481	3.02346	73.8292	74.4782	67.8888	77.8561	2.60764	69.1344	69.2326	61.5066	77.6815	3.09546	69.5873	69.1747	64.9078	75.0578	2.64641	-1.34085	0.184529	-0.939288	0.350954
foram_l_ns_l	111.481	111.454	99.0536	126.296	5.31497	112.402	111.732	96.0627	123.674	6.08601	105.636	105.771	89.4551	121.154	5.22478	105.702	105.874	95.8999	118.393	5.50254	-0.880731	0.382358	-0.0683929	0.945712
foram_l_ns_r	113.252	113.058	100.495	128.807	5.39318	113.991	112.889	98.2053	125.549	5.97239	107.293	107.475	91.4206	122.396	5.05549	107.647	107.138	99.2919	120.198	5.24591	-0.715312	0.47743	-0.385982	0.700932
foram_l_orb_d_l	106.51	106.696	93.392	118.054	4.94794	107.281	106.508	97.7546	117.656	4.85096	100.756	100.596	86.0198	116.821	4.6022	101.483	101.43	90.0467	114.837	5.42392	-0.900149	0.371641	-0.782526	0.437373
foram_l_orb_d_r	115.44	115.486	102.567	127.718	4.77772	116.151	114.706	106.333	126.936	4.81946	109.645	109.451	95.9139	123.259	4.4342	110.281	111.057	100.47	125.226	5.08508	-0.839523	0.404579	-0.727686	0.469945
foram_l_orb_u_l	123.803	124.231	110.88	133.89	4.52157	124.627	124.573	115.051	136.119	5.02817	117.456	117.381	105.512	136.489	4.27419	117.88	117.829	108.393	132.687	5.23474	-0.949601	0.346463	-0.474911	0.636833
foram_l_orb_u_r	131.498	131.855	117.904	141.636	4.45984	132.513	132.392	121.39	144.201	4.92307	125.218	125.244	113.567	142.242	4.21739	125.835	125.296	116.206	141.838	5.39883	-1.19204	0.238331	-0.674992	0.502731
foram_l_po_l	54.276	54.3802	42.0799	66.2581	3.5903	55.0939	55.0574	47.962	62.0569	4.01043	51.6827	51.5855	45.2844	61.5159	2.99215	52.5118	52.9692	45.665	59.0288	2.75947	-1.18145	0.242512	-1.67843	0.0982254
foram_l_po_r	82.797	82.8508	74.7274	92.1713	3.4364	83.6645	83.8493	76.0506	88.8208	2.99723	79.4225	79.3064	71.7737	88.7426	3.59329	80.1152	80.4489	73.2012	88.1164	3.26549	-1.59648	0.115167	-1.18122	0.241912
foram_l_zma_l	94.3439	94.2545	81.0322	106.51	4.63276	95.2419	94.862	87.3203	104.684	4.30229	89.9505	90.0112	77.8621	102.581	4.39459	90.0851	89.4684	81.2139	98.5163	4.27046	-1.16792	0.247274	-0.177993	0.859325
foram_l_zma_r	108.579	108.024	97.5632	119.035	4.51224	109.681	109.349	101.392	119.754	4.25335	104.02	104.108	91.5847	115.424	4.09592	104.214	104.097	96.1614	113.283	3.98708	-1.45418	0.150955	-0.275921	0.783552
foram_l_zo_l	106.959	106.846	93.9786	120.037	5.00672	107.557	106.886	98.5645	117.773	4.77997	101.321	101.616	86.8711	117.364	4.66581	101.866	101.463	89.3287	114.783	5.45961	-0.704197	0.483981	-0.582727	0.562527
foram_l_zo_r	114.871	115.014	101.058	127.64	4.71026	115.868	114.547	107.03	126.16	4.73505	109.296	108.962	95.3091	122.978	4.4948	110.075	111.239	101.38	124.126	4.9434	-1.19812	0.235669	-0.910274	0.366617
foram_r_al_l	113.739	113.005	100.958	125.96	5.01808	114.593	114.038	100.459	123.898	5.27703	107.955	107.572	95.6083	122.068	4.51712	107.746	107.259	99.5297	120.552	5.27456	-0.928509	0.357053	0.230688	0.818437
foram_r_al_r	110.184	109.944	97.0872	122.699	5.28566	110.99	110.568	97.2532	121.999	5.56599	104.642	104.381	90.5016	119.906	4.59544	104.54	104.021	95.8966	116.748	4.90634	-0.830002	0.409998	0.120068	0.904855
foram_r_alv	65.3707	65.7924	55.813	75.5127	3.82191	65.8775	65.299	57.2198	75.5202	4.65368	62.405	62.1378	53.7589	72.3419	3.60988	62.4991	62.3096	55.6841	71.993	3.81148	-0.639096	0.52555	-0.141668	0.887842
foram_r_b	150.685	150.956	135.634	164.295	5.23659	151.274	151.468	139.384	159.563	4.7927	144.089	143.992	130.467	164.6	5.32849	144.277	143.648	135.288	156.089	5.37874	-0.685708	0.495402	-0.198275	0.843515
foram_r_d_l	117.801	117.83	105.088	133.234	4.77923	118.518	118.429	108.86	129.731	5.30138	111.211	111.534	99.0419	131.357	4.84674	112.077	112.821	99.5669	124.889	6.04192	-0.783281	0.436812	-0.843618	0.402772
foram_r_d_r	114.059	114.241	101.137	128.671	4.96356	114.628	114.769	105.396	125.127	5.59881	107.819	107.749	95.975	127.4	4.91287	108.425	108.201	94.6598	121.585	6.31424	-0.589044	0.558261	-0.567803	0.572666
foram_r_ec_l	122.201	122.274	108.97	131.593	3.98469	122.637	121.901	114.504	132.92	4.06051	116.077	116.313	105.386	135.805	3.96031	116.497	115.954	109.121	126.11	4.17436	-0.61234	0.542693	-0.576813	0.566336
foram_r_ec_r	107.061	107.138	94.1751	116.927	4.17927	107.563	106.941	98.2391	118.407	4.51896	101.748	101.608	91.8675	116.203	3.92049	102.122	101.895	95.2143	113.675	4.0805	-0.640939	0.524174	-0.524421	0.602002
foram_r_ft_l	129.837	129.943	113.699	141.254	5.10961	130.555	130.758	117.17	141.376	4.73786	123.5	123.474	114.601	142.73	4.34861	124.394	123.205	116.236	139.626	5.48312	-0.847204	0.400108	-0.962157	0.340479
foram_r_ft_r	115.95	116.283	99.7495	128.306	5.04495	116.605	116.584	106.301	125.235	4.05991	109.853	110.052	99.3269	128.115	4.57209	110.885	109.84	100.728	127.083	5.66814	-0.872512	0.385874	-1.07102	0.289124
foram_r_ftm_l	127.92	127.879	116.086	137.137	4.15641	128.283	127.03	119.482	140.44	4.80678	121.868	121.937	111.753	141.303	4.13338	121.978	120.818	113.723	134.262	4.62657	-0.439569	0.66201	-0.137696	0.890985
foram_r_ftm_r	112.923	112.936	102.048	122.669	4.24418	113.089	112.679	102.644	125.11	4.91668	107.487	107.603	97.5658	122.801	4.08762	108.01	107.252	99.9667	121.467	4.59816	-0.197042	0.844538	-0.660454	0.511735
foram_r_l	107.144	107.331	89.8389	120.94	6.41474	107.528	107.34	96.7554	120.866	5.64852	104.009	104.246	88.4713	121.224	6.36212	104.981	105.507	89.8489	119.7	5.89159	-0.375972	0.708155	-0.922115	0.360004
foram_r_ms_l	73.267	73.45	64.3424	79.7487	2.96914	73.4501	73.7556	68.8634	79.5884	2.99013	68.9628	68.6998	61.7557	75.5389	2.75796	69.5414	69.7161	62.0053	76.1175	3.0279	-0.348365	0.72881	-1.1037	0.274482
foram_r_ms_r	41.6273	41.9481	32.7239	48.3211	2.59854	42.2054	42.3092	37.4632	47.6793	2.35605	38.6484	38.5601	31.3085	47.8986	2.63648	39.1105	39.3113	34.6069	44.272	1.96475	-1.36559	0.176866	-1.24349	0.217482
foram_r_ns_l	113.222	113.362	100.639	127.727	5.11397	114.054	113.34	96.824	124.293	6.01832	107.415	107.712	93.6653	122.033	4.94482	107.125	106.695	99.133	120.311	5.35293	-0.807546	0.422943	0.31149	0.756584
foram_r_ns_r	111.992	112.022	98.2835	126.69	5.34151	112.726	111.651	96.0231	124.079	6.259	106.006	106.15	91.5141	120.578	5.14263	106.11	105.784	98.4974	118.399	5.39275	-0.684323	0.49673	-0.109952	0.912832
foram_r_orb_d_l	115.725	115.682	102.819	127.318	4.64305	116.489	115.851	105.528	127.778	4.84555	109.844	109.911	96.9827	125.885	4.34679	110.3	109.428	100.783	123.956	5.28379	-0.903014	0.370293	-0.506474	0.61465
foram_r_orb_d_r	106.559	107.024	92.7591	119.535	5.01616	107.177	106.043	97.4069	117.992	5.12746	100.942	100.861	88.0667	114.154	4.53825	101.365	102.024	91.7629	116.438	5.04598	-0.687551	0.494466	-0.484675	0.629829
foram_r_orb_u_l	131.657	131.746	117.529	142.176	4.434	132.49	132.919	122.304	144.887	4.98715	125.196	125.216	115.186	144.606	4.22101	125.396	125.243	116.933	140.64	5.26471	-0.968304	0.337154	-0.22379	0.823803
foram_r_orb_u_r	123.619	123.668	109.758	133.832	4.62006	124.558	124.638	112.846	136.316	5.23952	117.519	117.545	107.491	134.268	4.24991	117.929	117.656	109.113	134.027	5.30477	-1.04031	0.302796	-0.454212	0.65158
foram_r_po_l	82.4678	82.5699	70.3018	92.3668	3.7662	83.113	83.2825	76.1002	90.0461	3.535	79.048	78.8083	71.8619	89.043	3.52815	79.6188	79.705	73.2037	88.4931	3.21514	-1.02347	0.31006	-0.989167	0.326336
foram_r_po_r	54.1873	54.4817	45.186	62.8698	3.35068	55.1171	55.2366	47.9397	61.94	3.38433	51.6696	51.4014	44.786	62.7398	2.99428	52.5275	52.9727	47.2961	58.2264	2.4714	-1.56375	0.123252	-1.88849	0.0631505
foram_r_zma_l	109.458	109.065	98.4293	119.998	4.31017	110.355	109.742	100.59	119.061	4.14572	104.504	104.611	93.7174	117.644	4.17724	104.318	103.356	98.3265	113.76	4.31147	-1.21861	0.227695	0.247408	0.805469
foram_r_zma_r	93.7565	93.865	81.8975	105.545	4.67304	94.9177	94.4315	86.0346	104.637	4.49118	89.7012	89.3045	79.0082	100.23	4.27826	89.6333	89.7126	80.5084	97.9701	3.74699	-1.4572	0.150201	0.0999651	0.920677
foram_r_zo_l	115.351	115.376	101.632	127.3	4.63103	116.252	115.233	105.766	127.646	4.74729	109.764	109.636	96.615	126.572	4.51545	110.039	109.588	100.661	123.359	5.36766	-1.08334	0.283132	-0.2998	0.765503
foram_r_zo_r	107.12	106.998	92.8803	121.746	4.97439	108.016	106.986	98.5244	118.228	5.18479	101.571	101.467	88.6307	114.839	4.54339	101.796	102.04	91.0601	116.352	5.16593	-0.989405	0.326615	-0.253235	0.801042
ft_l_b	104.335	104.646	89.8614	121.515	4.82363	103.907	103.938	94.5362	114.666	4.37732	101.244	100.796	84.9344	117.887	4.96235	100.008	100.687	88.1915	108.468	5.15968	0.544277	0.58815	1.37008	0.175986
ft_l_d_l	43.4611	43.2296	37.7924	51.1834	2.37431	44.0314	43.9617	38.4479	49.1105	2.70255	42.1515	41.9595	36.8048	50.2971	2.17626	42.3768	42.2149	38.407	48.4541	2.09869	-1.22598	0.225496	-0.605586	0.547046
ft_l_d_r	66.4217	66.2449	57.3511	74.9371	3.18363	67.6161	67.2645	61.5269	77.6508	3.46098	63.8019	63.6104	56.1368	74.7835	3.00492	64.1174	64.0407	59.241	73.5961	2.73017	-1.99014	0.0514769	-0.643572	0.522165
ft_l_ec_l	22.4297	22.3565	13.9807	29.6964	3.14226	23.2309	23.2304	18.0584	31.4381	2.86384	20.1846	19.9938	14.0086	28.4013	2.92114	21.1016	21.0742	12.4263	32.2014	3.85682	-1.55881	0.124012	-1.40996	0.164713
ft_l_ec_r	103.409	104.03	90.9096	110.971	3.81206	105.021	104.919	97.4027	117.411	4.0114	99.706	99.8297	89.8519	113.86	3.63754	100.01	100.038	93.3726	110.411	3.26186	-2.30448	0.0248557	-0.51737	0.606671
ft_l_ft_r	101.074	101.037	88.691	109.301	4.30522	102.14	102.6	90.838	114.789	4.67193	98.0519	98.0585	86.4806	112.744	4.32186	98.0725	98.1745	88.8563	107.558	3.43357	-1.31536	0.193755	-0.0324354	0.974215
ft_l_l	160.562	160.505	145.784	178.899	6.87779	159.987	160.018	150.437	172.072	5.26305	154.387	154.51	136.349	179.813	6.22341	154.39	153.632	142.332	170.691	6.5204	0.582037	0.562299	-0.00255375	0.997971
ft_l_ms_l	107.62	107.882	88.1576	125.285	5.67218	108.124	108.279	98.8809	118.185	4.58298	100.393	100.488	89.6451	111.189	4.58212	100.584	99.1891	90.6891	113.228	5.12457	-0.594457	0.554106	-0.216111	0.829702
ft_l_ms_r	151.594	151.522	131.773	161.43	5.19279	153.199	153.401	141.85	166.624	5.3546	143.06	143.261	133.213	163.36	4.246	143.549	142.835	136.879	156.261	4.20413	-1.71223	0.0922091	-0.6587	0.512627
ft_l_orb_d_l	45.61	45.51	36.9931	52.8992	3.09045	46.5632	46.6493	42.0662	54.4815	2.74213	43.0716	42.6483	34.9636	53.064	2.86147	43.9253	43.5826	37.8689	54.2568	3.48113	-1.92498	0.0586153	-1.4389	0.156133
ft_l_orb_d_r	90.8991	91.3606	79.4419	98.7722	3.62451	92.3579	92.5554	84.5108	101.949	3.81065	87.6779	87.9353	78.7952	99.2566	3.39547	88.0385	88.1925	82.4486	99.8966	3.35011	-2.195	0.0322442	-0.609818	0.544296
ft_l_orb_u_l	26.8278	27.1115	18.133	33.4035	2.655	27.2335	26.8143	22.4662	33.7915	2.54976	25.0025	24.9984	18.957	31.4159	2.03958	25.0527	25.1381	20.0691	29.6828	2.05347	-0.896574	0.373475	-0.138969	0.889949
ft_l_orb_u_r	83.3091	83.8634	73.3561	91.7184	3.38372	84.4149	84.5633	77.3402	94.3801	3.71039	80.4991	80.5255	71.5745	92.8552	3.54254	80.5683	80.898	73.8701	89.8291	3.00794	-1.72121	0.0907768	-0.126009	0.9001
ft_l_po_l	81.4524	81.9104	65.3297	91.9736	4.81929	81.0974	81.2784	72.5734	88.3111	3.70193	77.2563	76.7734	69.9036	86.1758	3.64073	77.2591	77.4324	70.3094	88.0154	3.93857	0.511579	0.610465	-0.00419906	0.996665
ft_l_po_r	137.729	137.742	121.091	150.952	4.85995	138.39	138.611	129.645	151.368	4.73588	132.409	132.48	122.255	145.798	4.19711	132.104	131.925	126.746	140.904	3.09539	-0.788936	0.433243	0.518288	0.605736
ft_r_b	104.758	104.841	92.0937	114.618	4.47502	104.917	105.177	93.1948	118.08	5.1196	101.914	101.405	88.6818	117.723	4.62764	100.876	101.227	86.6546	113.693	4.85757	-0.180789	0.857208	1.22464	0.225734
ft_r_d_l	66.7973	66.8822	59.0136	76.7663	3.13591	67.6296	67.4625	60.9837	76.9479	3.22666	64.1345	64.081	55.9202	73.8797	3.01079	64.276	64.238	59.0694	73.4888	2.85318	-1.47318	0.146113	-0.278678	0.781426
ft_r_d_r	43.6142	43.7625	35.9271	51.7539	2.45701	43.949	44.0163	38.9037	50.4083	2.69577	42.4781	42.4862	38.1678	49.6516	2.0873	42.5596	42.7048	37.9036	48.5997	2.21274	-0.717338	0.476172	-0.211548	0.833217
ft_r_ec_l	103.9	104.338	90.3647	111.916	3.85878	105.107	104.763	96.5003	114.792	3.94224	99.8873	99.822	91.5864	111.592	3.66226	100.27	100.208	93.0731	110.53	3.44545	-1.74666	0.0859685	-0.623366	0.535335
ft_r_ec_r	22.3036	22.3582	15.4884	31.041	3.12511	22.6316	22.2407	17.5757	30.8022	3.11714	19.561	19.4023	11.0528	29.5138	3.43725	20.4715	20.2959	13.9723	32.0733	3.94063	-0.597389	0.552524	-1.34398	0.184565
ft_r_l	160.352	160.223	143.615	178.39	6.78776	160.337	160.265	147.175	171.83	5.9227	154.633	154.887	137.658	174.87	6.0065	154.715	153.826	145.058	171.041	6.01031	0.0140556	0.988828	-0.0777501	0.938289
ft_r_ms_l	150.899	151.097	128.768	162.249	5.14144	151.7	151.211	139.802	163.213	5.04812	142.297	142.336	131.779	156.296	4.14575	142.74	142.271	131.831	153.708	4.76494	-0.898106	0.372724	-0.540519	0.591062
ft_r_ms_r	107.311	107.121	89.8204	120.494	5.46503	108.345	107.855	96.5483	118.436	4.93393	100.013	100.29	88.2441	115.812	4.63198	100.449	100.711	90.0501	114.01	4.89271	-1.16494	0.248369	-0.511164	0.611213
ft_r_orb_d_l	91.7934	92.2902	81.6685	99.9242	3.5932	92.7625	93.003	84.9188	101.486	3.5624	88.229	88.0997	79.8536	98.9084	3.33582	88.7222	88.6217	81.5077	100.487	3.52306	-1.54272	0.1282	-0.803255	0.425169
ft_r_orb_d_r	45.6312	45.7155	37.0031	54.5297	2.86615	46.3082	46.2058	40.7333	54.15	2.92753	43.0098	42.795	35.2982	52.5473	2.9335	43.6849	43.2421	38.6815	55.7309	3.38478	-1.31903	0.192323	-1.16119	0.250681
ft_r_orb_u_l	84.0036	84.5173	73.1382	93.3328	3.46755	84.8955	85.1387	76.3251	94.9204	3.6346	81.0584	80.76	72.3833	92.6617	3.5479	81.144	81.2011	74.3641	90.3064	3.30289	-1.40613	0.165093	-0.145045	0.885142
ft_r_orb_u_r	27.4068	27.482	17.9271	33.1823	2.55365	27.7187	27.6851	22.2395	33.929	2.43403	25.6902	25.5852	18.7238	31.468	2.12383	25.6376	25.8814	21.5724	29.5263	2.08235	-0.72112	0.473579	0.142846	0.886891
ft_r_po_l	136.471	136.82	118.735	146.697	4.69417	136.95	137.125	128.221	148.869	4.72478	131.012	130.943	122.284	143.718	3.74947	131.244	131.732	119.933	139.449	4.20671	-0.576463	0.566501	-0.319044	0.750906
ft_r_po_r	81.7188	81.6055	64.4425	92.7565	4.80334	81.3767	81.4743	72.2433	89.3326	4.07679	77.7934	77.5315	66.6848	89.7338	3.80217	77.2769	76.6096	70.1611	87.9145	4.06673	0.459845	0.647105	0.730358	0.468191
ftm_l_b	117.725	117.732	103.612	132.151	4.57683	118.163	116.975	110.1	129.867	4.38489	112.504	112.31	99.9913	136.142	4.77649	112.114	113.118	102.751	122.621	4.42063	-0.562183	0.57605	0.493334	0.6235
ftm_l_d_l	42.6525	42.4818	37.1608	48.0949	2.07017	43.031	43.1246	37.4628	48.3212	2.30789	41.0526	40.8884	36.7434	47.5997	2.03434	41.033	40.9993	37.4684	44.9544	1.87216	-0.949567	0.346486	0.058246	0.953737
ftm_l_d_r	67.2603	67.3591	59.7158	77.415	3.2941	68.2683	68.3316	60.8008	78.8291	3.59248	64.0062	63.8196	56.75	74.876	3.03057	64.1432	64.3982	59.1352	73.5595	2.80886	-1.61915	0.111058	-0.272692	0.785987
ftm_l_ec_l	9.23649	9.35704	3.95916	14.0885	1.82768	9.14537	8.90072	5.29034	14.1373	2.2391	9.29201	9.1803	3.98097	14.4785	2.01107	8.78769	8.73623	4.79464	12.8722	1.91763	0.239033	0.812017	1.47976	0.144061
ftm_l_ec_r	104.789	105.082	92.7929	113.053	3.90052	106.324	106.155	98.5533	118.719	4.07599	100.598	100.59	91.3627	113.779	3.65548	100.657	101.046	94.5254	109.683	3.38559	-2.15769	0.0351543	-0.0980581	0.922199
ftm_l_ft_l	14.8487	14.6277	7.27187	21.9082	2.86308	15.7432	15.8379	8.55581	21.1698	2.72316	12.3095	11.8754	6.49487	20.3218	2.83988	13.4672	12.5725	8.07929	24.5423	3.68654	-1.84721	0.0695384	-1.85848	0.0689181
ftm_l_ft_r	105.547	105.712	93.7401	114.982	4.04261	106.705	106.074	97.3613	116.406	4.31156	101.302	101.506	91.4433	115.168	3.90397	101.536	101.417	94.526	113.001	3.52591	-1.5435	0.128287	-0.368947	0.713386
ftm_l_ftm_r	107.846	107.845	93.8993	116.888	4.28273	109.163	109.59	99.9469	120.851	4.40104	103.197	103.384	93.4713	117.266	3.9773	103.253	102.874	96.5775	113.916	3.50888	-1.709	0.0927975	-0.0896368	0.92885
ftm_l_l	167.038	166.971	152.126	183.492	6.85123	166.791	166.723	155.707	183.157	5.7755	160.019	160.174	144.162	190.238	6.57806	159.99	159.903	145.786	175.091	6.79607	0.233747	0.815885	0.0243639	0.980646
ftm_l_ms_l	101.816	101.424	86.7557	117.045	4.75224	101.729	102.176	93.5783	113.211	4.66153	95.913	95.7132	83.1633	108.437	4.32862	95.0004	95.0662	88.1479	104.767	4.18877	0.105693	0.916179	1.22952	0.22363
ftm_l_ms_r	150.223	150.686	132.159	161.089	4.61332	151.433	151.768	141.488	165.611	5.45277	141.874	141.846	131.509	162.196	4.29129	141.593	140.945	136.063	151.248	3.62161	-1.29711	0.200197	0.424515	0.672533
ftm_l_orb_d_l	35.5463	35.5074	31.2906	39.8623	1.70265	35.724	35.7594	32.5437	40.5201	1.72054	34.3976	34.3731	29.2722	38.4318	1.62215	34.1627	34.0798	31.2858	37.8541	1.5284	-0.587796	0.558924	0.862713	0.391629
ftm_l_orb_d_r	88.8022	88.9039	79.0695	97.2178	3.42864	89.8903	90.314	83.9262	99.7279	3.60228	85.5523	85.6016	77.6221	96.0122	3.33872	85.4407	85.8389	79.3482	94.534	3.17971	-1.73182	0.088703	0.19753	0.844066
ftm_l_orb_u_l	27.9141	27.9867	22.6253	32.9481	2.18221	28.4544	28.8395	23.8838	31.9861	1.90932	26.0715	26.0195	20.1765	30.9945	2.09591	26.1024	26.1109	22.8164	30.2831	1.50052	-1.56196	0.1231	-0.107564	0.914611
ftm_l_orb_u_r	86.2505	86.6244	76.4167	96.059	3.53071	87.3845	87.7774	79.471	97.008	3.75036	82.7288	82.6199	73.8508	94.6447	3.4724	82.8354	83.1211	77.1028	93.2571	3.18578	-1.73688	0.0878372	-0.18663	0.852549
ftm_l_po_l	78.2221	78.2911	69.8798	87.6851	3.59364	77.5968	77.7444	68.9065	85.3774	3.61167	74.775	74.5873	67.1954	86.768	3.719	74.0133	73.9973	66.3296	79.1041	3.15449	0.984522	0.328885	1.32284	0.190351
ftm_l_po_r	138.94	139.598	125.726	149.998	4.53163	139.48	139.242	129.443	153.311	4.94196	133.263	132.94	123.65	147.168	4.34614	132.56	132.212	125.958	138.385	2.82576	-0.630832	0.530728	1.25721	0.211965
ftm_r_b	117.825	117.259	103.289	130.113	4.46337	118.542	118.342	110.114	131.066	5.02308	112.8	112.79	101.434	130.201	4.42325	112.23	112.225	101.287	119.738	4.09661	-0.828055	0.411238	0.77747	0.439807
ftm_r_d_l	67.4141	67.3267	58.5362	76.9593	3.28632	68.4587	68.8378	61.6473	79.4188	3.37202	64.4884	64.4754	57.0108	74.3037	2.94517	64.4821	64.5413	58.8667	73.3082	2.70528	-1.76849	0.0822316	0.0129976	0.989671
ftm_r_d_r	42.7457	42.5637	35.2239	48.2315	2.20112	43.1628	43.4915	39.1994	48.3677	2.02407	41.5463	41.5455	37.4482	46.7934	1.86578	41.3967	41.4093	37.5014	45.034	1.975	-1.15068	0.254209	0.434879	0.665297
ftm_r_ec_l	105.124	105.368	92.1909	113.689	3.97968	106.493	106.836	97.7312	118.13	4.08162	100.866	100.666	92.1018	113.124	3.72147	101.038	100.951	94.4261	110.269	3.34592	-1.9134	0.0606307	-0.285823	0.775934
ftm_r_ec_r	9.55181	9.59128	4.86634	14.959	1.84858	9.19443	8.71741	4.53595	15.0172	2.43045	9.17438	9.10393	4.51604	16.2423	2.05146	9.26436	8.89853	6.43795	14.7411	2.01709	0.871562	0.387586	-0.252562	0.801472
ftm_r_ft_l	105.327	105.467	92.6791	113.373	4.04166	106.739	106.404	97.6661	117.981	4.29708	101.364	101.399	90.8636	116.211	3.91915	101.489	101.333	93.8953	112.143	3.34602	-1.88727	0.0642489	-0.204851	0.838309
ftm_r_ft_r	14.5196	14.4791	7.40857	20.8294	2.77322	15.1798	14.5541	8.69084	21.3326	3.08664	11.9348	12.0561	5.57365	20.7229	2.92848	12.556	12.094	7.47989	26.1483	3.43184	-1.23833	0.220848	-1.05641	0.295534
ftm_r_l	166.785	166.704	151.585	184.193	6.81504	166.786	166.585	155.712	183.741	6.28359	160.162	160.256	145.473	181.977	6.34467	160.327	159.978	148.404	174.42	5.97162	-0.000436304	0.999653	-0.154525	0.877698
ftm_r_ms_l	149.445	149.553	128.293	161.54	4.83745	149.945	149.764	138.95	164.803	5.26644	141.274	141.483	129.438	152.626	4.09279	141.23	140.106	131.87	151.663	4.39452	-0.548023	0.585861	0.0574054	0.954425
ftm_r_ms_r	101.775	101.909	89.8697	114.903	4.46822	102.101	102.729	90.6638	113.773	5.23937	95.8101	95.848	83.5567	107.765	4.06391	95.5733	95.0123	87.7198	107.223	4.10949	-0.362873	0.718133	0.328051	0.744041
ftm_r_orb_d_l	89.598	89.7633	78.9903	97.1452	3.49374	90.6075	90.8825	83.063	101.716	3.58565	86.3451	86.2623	79.337	96.6807	3.23362	86.467	86.7553	79.2239	96.3085	3.26522	-1.6072	0.113437	-0.212634	0.832349
ftm_r_orb_d_r	35.9052	35.9025	30.1631	40.1593	1.80576	36.2281	36.3215	32.5806	40.428	1.74564	34.8912	34.9141	30.5155	40.8022	1.55441	34.8864	35.1137	32.3584	38.2843	1.56886	-1.04372	0.300758	0.0174884	0.986106
ftm_r_orb_u_l	86.6778	86.8757	76.27	95.1689	3.60136	87.9339	88.2966	79.927	99.0898	3.63931	83.3206	83.3652	74.0213	94.425	3.45682	83.3158	83.4401	76.0455	92.8111	3.33565	-1.96457	0.0542045	0.0081088	0.993557
ftm_r_orb_u_r	28.4376	28.3426	22.4118	35.8257	2.15906	29.2194	29.1505	26.0274	32.9823	1.82283	26.8558	26.7891	21.0303	31.883	2.06277	26.7591	26.7183	23.3727	29.7455	1.50544	-2.34698	0.0218538	0.337304	0.736791
ftm_r_po_l	137.539	138.24	122.385	147.221	4.60773	138	137.435	129.546	152.617	5.12712	131.935	131.953	122.358	144.097	3.84888	131.884	132.049	122.995	138.301	3.87354	-0.520121	0.605064	0.0745947	0.94079
ftm_r_po_r	78.7705	78.8609	69.9384	86.7566	3.52332	77.8664	77.8421	67.9591	88.9745	4.02251	75.5552	75.3605	67.114	85.0947	3.68084	74.629	74.7315	68.2073	80.0773	3.0141	1.30647	0.196907	1.66831	0.0997375
g_al_l	56.2799	56.427	47.6597	67.6599	3.25012	56.1714	56.1459	50.1174	62.8024	3.22642	53.7039	53.5217	46.0039	65.0849	3.47658	54.2854	53.8939	47.3232	62.2775	3.53445	0.190651	0.849449	-0.93767	0.352274
g_al_r	56.1119	56.2498	46.7418	65.2467	3.23918	56.2587	55.875	50.3002	63.4455	3.29841	53.6382	53.2356	45.1999	63.3401	3.43248	54.3316	54.2528	47.6588	62.9449	3.75146	-0.253702	0.800617	-1.06695	0.290597
g_alv	84.7321	84.6523	74.6993	95.2691	3.85222	84.6749	84.853	76.4316	96.3961	4.51486	79.6637	79.5695	70.7801	90.6926	3.73341	79.9249	79.6199	70.3417	89.4086	4.39796	0.0738834	0.941379	-0.346874	0.730053
g_ast_l	162.106	161.922	148.611	176.98	5.82455	161.661	161.183	148.068	176.79	5.50335	151.769	151.304	139.509	165.828	4.79853	151.546	152.001	140.161	162.89	5.2302	0.454567	0.651017	0.246489	0.806208
g_ast_r	162.451	163.086	143.785	174.412	5.48227	162.821	162.441	152.457	179.194	5.70376	152.493	152.158	138.915	179.538	5.22349	151.971	151.673	140.821	167.205	5.08537	-0.371476	0.711648	0.579543	0.564382
g_b	108.336	108.85	92.8095	124.6	5.59012	108.616	107.002	100.32	124.186	5.41977	101.671	101.613	88.3465	120.584	5.48403	100.682	101.024	90.5059	109.277	4.24772	-0.292533	0.770881	1.24454	0.217248
g_ba	114.475	114.874	101.993	126.48	5.14315	115.026	114.703	102.548	128.201	5.36291	107.377	107.311	94.8519	128.276	4.86901	108.091	107.082	98.3357	124.046	5.81927	-0.588848	0.558273	-0.718025	0.475905
g_d_l	25.4091	25.418	20.4853	31.6516	2.34308	25.2945	24.4979	21.4784	32.0191	2.58494	24.6506	24.5546	17.6501	37.5963	3.1091	24.0498	23.4703	20.0979	29.7995	2.30862	0.256218	0.798733	1.37436	0.173324
g_d_r	25.5358	25.3737	18.5474	31.7032	2.41439	25.9231	25.2819	22.079	31.9395	2.15421	24.6909	24.5863	16.2878	37.3951	3.12873	24.6485	24.654	20.0294	30.6227	2.67452	-0.997034	0.322466	0.0868946	0.931014
g_ec_l	60.9734	60.6818	53.5865	70.6782	2.64909	61.5817	61.6332	54.5861	70.1752	3.03655	58.0904	58.2784	48.7657	68.068	2.78098	58.1066	57.8856	53.1235	63.3017	2.52313	-1.16526	0.249026	-0.0357264	0.971612
g_ec_r	61.0994	61.2645	54.6118	68.1127	2.48256	62.2777	62.3441	57.5512	71.0345	2.91019	58.3101	58.3546	52.2235	65.2826	2.48587	58.6713	59.1775	53.5101	64.8936	2.63591	-2.36302	0.0217993	-0.78687	0.43463
g_en_ba	115.399	115.967	103.358	127.68	5.0781	115.884	115.683	103.377	128.796	5.27083	108.199	108.307	95.6502	128.777	4.78937	108.864	107.763	98.9862	124.902	5.80975	-0.526129	0.600819	-0.671401	0.504914
g_eu_l	132.344	131.979	115.802	152.468	7.0697	130.818	129.373	119.65	146.258	5.99101	124.707	124.905	107.776	144.522	6.34686	125.326	125.213	115.792	135.016	5.20081	1.39557	0.167413	-0.64611	0.52033
g_eu_r	132.91	132.717	119.066	154.03	6.82193	132.879	131.567	122.17	149.329	5.89263	125.723	125.964	109.126	142.154	5.86737	126.043	125.94	117.843	135.176	4.6921	0.0284095	0.977421	-0.368015	0.713952
g_foram_l	135.728	136.208	121.188	147.988	5.1181	136.334	135.725	124.396	151.085	5.83719	127.664	127.757	115.041	149.109	4.95323	128.333	129.077	116.868	145.505	6.3206	-0.603712	0.548551	-0.625649	0.534332
g_foram_r	135.688	135.964	120.132	147.531	5.13815	136.329	135.542	124.601	151.35	5.9828	127.658	127.797	116.996	148.701	4.92424	128.147	128.916	117.74	145.587	6.22705	-0.624157	0.535172	-0.463373	0.645057
g_ft_l	57.7108	57.8424	48.6484	64.7689	3.13695	58.2579	57.9675	48.1027	65.813	3.60032	54.6916	54.6098	44.5295	66.718	3.13545	54.4574	54.5983	48.2369	59.396	2.5043	-0.884056	0.380582	0.504311	0.615595
g_ft_r	58.2693	58.454	52.4183	66.9765	2.97975	59.0709	58.5233	51.4052	67.255	3.00075	55.2545	55.157	47.0201	64.0501	2.90421	55.3832	55.3318	50.9279	60.3563	2.60187	-1.51944	0.134008	-0.274681	0.784441
g_ftm_l	60.7258	60.8349	53.6921	69.6512	3.01382	61.2749	61.0561	51.9401	68.5321	3.39247	57.2847	57.4843	48.4194	69.6323	3.09139	57.2551	57.0391	51.404	64.5216	2.47777	-0.938809	0.351957	0.0644761	0.948772
g_ftm_r	61.0264	61.1066	51.9846	69.0519	2.93818	62.1938	61.9384	57.119	69.255	2.86322	57.8317	57.6776	50.5344	66.0786	2.87777	58.0168	58.5861	52.3325	64.2624	2.67627	-2.30444	0.0246607	-0.38719	0.699932
g_l	179.864	180.022	163.666	198.693	8.13948	179.908	179.582	165.737	201.147	7.42588	170.182	169.691	150.158	199.347	7.32105	169.877	169.694	155.073	188.37	7.68038	-0.0328645	0.973886	0.227939	0.820507
g_ms_l	141.016	141.178	124.427	157.3	5.64149	141.386	141.281	124.615	157.603	5.75264	131.769	131.629	120.815	147.612	4.83945	131.33	131.811	123.068	143.936	5.70044	-0.367176	0.714817	0.449328	0.655019
g_ms_r	141.562	142.156	127.414	155.662	5.0611	142.811	143.252	127.901	158.56	6.0946	132.287	132.586	120.636	153.436	4.69055	132.184	131.457	121.333	146.863	5.33923	-1.20111	0.235088	0.112282	0.911014
g_n	9.37507	9.29756	5.13153	13.4196	1.75093	8.61739	8.44332	5.3993	12.6725	1.54791	9.96971	9.71674	6.29992	19.1142	2.02013	9.95211	9.83871	7.22829	15.0977	1.63729	2.70848	0.00862609	0.0582299	0.95373
g_ns_l	63.5832	63.7112	54.198	77.6572	3.35309	63.1285	63.0488	56.7263	71.4816	3.41091	61.1692	60.9052	52.8396	72.0817	3.33973	61.6693	61.1294	56.5562	71.4748	3.45247	0.759721	0.450477	-0.828044	0.411054
g_ns_r	63.2413	63.2282	52.6478	75.8192	3.22053	63.071	62.5145	57.3449	70.8354	3.29221	61.1602	61.1239	54.7759	71.0188	3.3512	61.7463	61.6442	55.7143	71.2322	3.40365	0.295008	0.769037	-0.981044	0.330613
g_o	149.916	150.293	135.457	163.422	5.62635	150.579	150.722	138.598	163.548	6.08741	141.832	141.917	129.904	163.527	5.30404	141.992	141.65	132.635	156.805	5.87515	-0.627463	0.532904	-0.157854	0.875148
g_op	184.861	184.762	168.114	204.918	8.38417	185.147	183.505	173.369	205.414	7.56868	174.802	173.842	156.582	205.688	7.4181	175.023	173.889	160.585	194.773	8.58247	-0.209984	0.834347	-0.149996	0.881328
g_op_n	184.987	185.028	167.871	204.524	8.34424	185.361	183.021	172.872	205.959	7.46953	175.117	174.268	157.294	204.917	7.31653	175.234	174.24	161.298	194.49	8.43389	-0.277478	0.782301	-0.0812128	0.935573
g_orb_d_l	52.7222	52.7273	46.982	63.2053	2.7381	52.78	52.6589	45.5904	59.7797	3.11497	51.2038	50.8674	44.137	60.7416	3.02579	51.3457	50.7995	46.2324	58.9656	2.75095	-0.10789	0.91448	-0.287273	0.774837
g_orb_d_r	52.1272	52.3117	45.3593	60.7943	2.46858	52.7538	52.703	45.4948	59.9906	3.032	50.8275	50.9974	42.8728	60.0338	3.00621	51.1476	50.8939	46.0792	58.4932	2.93946	-1.21416	0.230165	-0.615913	0.540278
g_orb_u_l	33.4153	33.2354	27.5619	39.2448	2.02579	33.488	33.2906	28.4754	40.087	2.19853	31.8707	31.8758	25.4612	39.8277	2.07968	31.7742	31.8504	28.0084	35.8008	2.0042	-0.190551	0.849568	0.271627	0.78683
g_orb_u_r	33.2042	33.4295	27.6941	38.1261	1.88743	33.7047	33.6231	29.8169	38.5246	1.85692	31.6921	31.6386	27.1978	36.7607	1.81084	31.9335	32.2539	27.8919	36.0916	1.99782	-1.52619	0.132233	-0.698328	0.487896
g_po_l	121.261	121.658	109.717	132.853	4.69613	121.216	121.877	110.696	135.048	4.74166	114.611	114.757	103.079	127.203	3.99767	114.14	113.551	104.681	123.196	4.46932	0.0535115	0.957506	0.61139	0.543464
g_po_r	122.493	123.01	111.962	132.388	4.37154	122.706	122.529	112.231	136.529	4.76487	116.056	115.921	105.264	131.501	4.00774	115.272	115.04	107.843	123.967	3.9774	-0.258513	0.796962	1.11769	0.268194
g_ra_l	118.567	118.745	104.682	130.657	4.835	118.509	117.962	107.66	134.086	4.91022	110.126	110.396	97.6671	125.71	4.47748	109.774	109.884	100.932	119.302	4.87286	0.0671968	0.946654	0.416843	0.678392
g_ra_r	118.129	118.447	106.465	130.144	4.9659	118.191	117.238	107.788	132.405	4.7967	110.315	110.298	98.9666	129.791	4.44398	109.936	109.715	102.064	122.557	4.61075	-0.072969	0.942071	0.470396	0.639848
g_zma_l	81.5212	81.7752	69.2711	92.8673	4.0693	81.7491	82.4011	71.8538	88.9611	4.31355	76.5539	77.0823	67.1495	88.8853	4.01224	76.8611	76.9765	69.2044	84.2919	4.29399	-0.303375	0.762712	-0.411403	0.682335
g_zma_r	81.6315	81.803	72.0679	92.1904	4.09587	82.0764	82.103	73.374	94.156	4.59014	76.9556	77.3942	67.2691	89.1284	4.02636	77.7834	76.5957	71.4666	87.9259	4.24625	-0.561782	0.576554	-1.11841	0.268084
g_zo_l	50.7032	50.9873	41.9313	61.1158	3.2562	51.6678	51.6688	44.6083	59.3038	3.92182	50.1904	49.9042	42.3358	62.5304	3.60428	50.3553	49.7731	46.3434	57.3292	2.87146	-1.44122	0.155449	-0.309515	0.757829
g_zo_r	49.195	49.33	40.5696	57.2211	3.20761	49.8652	49.0701	42.4148	57.309	3.50302	48.8052	48.7601	38.459	60.4993	4.02039	50.1308	49.9629	41.2783	58.0793	3.76013	-1.10432	0.274201	-1.97556	0.052647
g_zy_l	102.848	102.932	92.1998	111.692	3.81644	103.41	103.275	90.9985	116.013	4.64555	96.5176	96.1799	87.0422	106.487	3.83659	97.0865	96.4796	87.9967	106.066	3.94836	-0.709665	0.481064	-0.822943	0.413915
g_zy_r	103.66	103.612	91.5317	114.37	4.01176	104.587	104.558	95.4145	117.148	4.24892	96.78	96.2769	87.8855	106.869	3.57638	97.2751	96.9812	88.946	106.784	3.68486	-1.25156	0.215859	-0.767658	0.44581
l_d_l	168.588	169.001	153.092	185.456	7.33642	168.57	167.594	157.121	186.886	6.74788	161.806	161.597	143.437	191.127	7.05058	161.921	161.447	148.332	180.835	7.70354	0.0153924	0.987768	-0.0862183	0.931602
l_d_r	168.297	168.33	154.496	185	7.22113	168.408	167.993	158.607	186.817	6.66341	162.008	161.557	144.576	189.986	6.90903	161.931	161.747	147.667	179.209	7.66086	-0.093372	0.925905	0.0583489	0.953682
l_ec_l	167.039	167.594	151.791	184.049	7.08652	166.825	166.315	155.962	184.499	5.80227	159.955	159.952	144.032	188.284	6.48609	160.083	160.401	145.2	175.215	6.9319	0.200043	0.842029	-0.106818	0.915312
l_ec_r	166.609	167.014	149.821	183.776	7.05691	166.765	165.748	155.976	184.908	6.25668	159.992	160.105	143.093	182.321	6.47529	160.191	159.671	147.789	173.228	6.17047	-0.138078	0.890606	-0.181866	0.856288
l_ms_l	128.604	128.48	110.664	144.515	6.24713	129.151	129.915	114.427	141.367	6.6414	122.241	121.791	106.939	136.064	6.18278	124.184	124.456	108.747	141.016	6.82041	-0.473468	0.637698	-1.64676	0.105274
l_ms_r	128.8	128.982	110.607	146.508	6.48548	129.597	130.986	113.26	140.887	6.69063	122.77	122.123	108.701	138.835	6.38656	124.337	124.743	113.099	138.262	5.91158	-0.680678	0.498791	-1.48141	0.143506
l_orb_d_l	176.591	176.676	160.135	195.403	7.54559	176.895	176.446	164.752	196.477	6.52887	169.594	169.189	151.279	195.739	6.71618	169.925	169.477	153.432	186.009	7.74082	-0.2566	0.798281	-0.248852	0.804421
l_orb_d_r	176.526	176.671	157.994	196.061	7.60502	177.021	175.737	165.83	196.922	6.89826	169.858	169.686	150.568	192.483	6.76154	170.127	169.946	154.665	183.169	7.15925	-0.398986	0.691237	-0.215414	0.830216
l_orb_u_l	173.087	173.164	158.503	191.316	7.54593	172.929	172.333	161.756	189.165	6.25605	165.364	164.806	146.256	194.615	6.99024	165.083	164.732	151.604	183.233	7.44033	0.137321	0.891177	0.217198	0.828834
l_orb_u_r	172.985	172.845	157.921	190.963	7.63362	173.243	173.314	161.235	192.141	6.77321	165.705	165.421	148.789	191.51	6.90964	165.518	165.449	152.502	182.866	6.98166	-0.211573	0.833103	0.152991	0.87893
l_po_l	118.627	118.959	103.854	131.911	5.73577	118.517	118.766	107.686	132.754	5.89634	114.67	114.415	104.01	126.852	5.15191	115.256	115.801	102.263	127.689	5.76525	0.107224	0.914981	-0.588427	0.55866
l_po_r	118.46	118.983	101.568	135.219	5.80454	119.253	120.26	106.214	133.429	6.0986	114.804	114.852	100.479	129.396	5.10388	115.569	115.365	104.065	128.259	4.98973	-0.74605	0.458696	-0.866571	0.389623
ms_l_d_l	116.786	116.484	99.4397	130.167	5.21333	117.23	116.877	104.916	127.006	4.74637	109.221	109.032	96.3084	123.765	4.75787	109.193	108.221	100.299	119.453	5.31816	-0.521895	0.603558	0.0302271	0.975996
ms_l_d_r	128.091	128.086	110.795	141.42	5.50007	128.729	128.182	115.548	142.956	5.46868	119.912	119.632	107.457	133.982	4.74912	119.801	119.319	110.079	132.668	5.6885	-0.661876	0.510612	0.114607	0.909191
ms_l_ec_l	96.4645	96.2455	82.2377	113.523	4.7664	96.3874	96.3084	87.7538	105.558	3.81117	90.3242	90.2921	79.9313	103.414	4.07075	89.6531	89.8776	81.8622	98.8496	4.20082	0.109029	0.913485	0.912936	0.365067
ms_l_ec_r	143.095	143.269	122.811	154.86	4.80475	143.936	144.617	134.439	157.995	4.82221	135.346	135.398	123.135	146.347	3.97109	135.163	134.568	126.994	143.393	4.15572	-0.992009	0.325247	0.251189	0.802567
ms_l_ms_r	112.127	112.484	97.7071	121.472	4.3596	112.951	113.112	105.478	120.199	4.04039	105.267	105.175	93.3907	118.05	4.48558	105.76	105.856	98.8872	114.136	3.89194	-1.14175	0.257905	-0.697154	0.488148
ms_l_orb_d_l	101.009	100.866	83.6332	116.638	5.30445	101.425	101.23	94.5236	111.568	3.92747	94.7702	95.0187	82.8837	111.014	4.50807	94.0529	93.6464	83.5894	104.533	5.2744	-0.558885	0.57786	0.793505	0.430992
ms_l_orb_d_r	130.843	130.901	110.818	143.589	5.10509	131.453	131.721	121.174	144.899	4.756	123.576	123.601	110.969	135.171	4.19126	123.157	123.195	115.502	134.294	4.76734	-0.717944	0.475472	0.511347	0.611179
ms_l_orb_u_l	120.203	120.276	103.515	136.301	5.16557	120.776	120.451	108.295	132.019	4.52635	112.925	112.962	102.455	127.637	4.24837	112.193	111.32	105.492	122.943	4.78027	-0.699593	0.486654	0.888458	0.378185
ms_l_orb_u_r	146.116	145.852	126.22	158.409	5.15836	147.065	147.355	134.55	161.224	5.04107	138.048	137.915	125.691	149.685	4.14665	137.792	138.288	129.701	149.218	4.6729	-1.06441	0.291401	0.317771	0.75187
ms_l_po_r	120.574	120.736	106.166	131.233	4.59838	121.485	121	114.866	130.776	4.51923	114.075	113.47	101.402	127.295	4.37471	114.692	114.483	108.451	121.801	3.69612	-1.14186	0.258057	-0.91426	0.363821
ms_r_d_l	128.756	129.157	112.964	141.152	4.75012	130.189	130.546	117.057	143.694	5.57742	120.528	120.266	110.179	141.278	4.64247	120.719	120.001	110.224	132.589	5.09942	-1.4991	0.139741	-0.216469	0.829415
ms_r_d_r	117.097	117.441	101.878	127.887	4.82437	118.144	118.909	106.6	128.136	5.54773	109.717	109.505	99.2976	130.194	4.63112	109.597	109.201	100.615	120.995	5.35624	-1.09813	0.27702	0.129894	0.897135
ms_r_ec_l	144.3	144.925	127.801	153.986	4.46118	145.563	146.207	136.843	157.722	4.96958	136.064	136.074	125.473	156.936	4.25883	136.076	135.508	129.153	144.219	3.55837	-1.47183	0.146764	-0.0184948	0.985298
ms_r_ec_r	96.3034	96.4223	83.3379	107.791	4.50321	96.8673	96.7252	85.9889	106.403	4.89373	90.3491	90.3332	79.9318	105.949	3.93968	89.9034	89.7272	80.5916	100.472	4.09219	-0.664563	0.509063	0.62317	0.535634
ms_r_orb_d_l	131.782	132.585	115.567	141.295	4.78378	133.139	134.221	120.73	145.899	5.13712	124.325	124.426	113.683	142.191	4.23876	124.184	123.47	115.386	135.805	4.57522	-1.52099	0.133859	0.176729	0.860358
ms_r_orb_d_r	101.923	102.598	87.4548	114.316	5.03992	102.764	103.237	90.182	112.448	4.88342	95.5258	95.9812	85.0995	110.884	4.30385	95.1135	94.1439	83.9063	109.544	4.84513	-0.971679	0.335079	0.493656	0.623526
ms_r_orb_u_l	146.85	147.848	130.514	157.688	4.84384	148.384	148.781	136.34	162.692	5.549	138.582	138.557	127.003	158.704	4.35432	138.282	137.502	131.013	150.574	4.38841	-1.60688	0.113901	0.388729	0.698881
ms_r_orb_u_r	120.723	121.134	106.088	132.193	4.87092	122.032	122.95	108.674	133.612	5.21842	113.504	113.171	103.088	131.14	4.08158	113.207	112.609	104.955	127.198	4.5299	-1.44331	0.154466	0.378611	0.706431
n_al_l	47.3792	47.2936	39.6445	58.1473	2.79907	47.9447	47.9604	42.8038	54.1703	2.83085	44.1131	43.8658	36.2429	51.9552	2.87583	44.6557	44.3769	38.1404	51.4121	3.14455	-1.13732	0.260029	-0.996103	0.323511
n_al_r	47.2031	47.183	38.6095	55.7055	2.86942	48.0485	47.6426	43.4789	54.9745	2.8252	44.0451	43.7982	36.4906	50.9332	2.86748	44.7525	44.7947	38.739	51.5469	3.35523	-1.69474	0.0953269	-1.23011	0.22404
n_alv	76.2059	76.0674	66.6433	87.9129	3.7	76.8625	76.7572	68.4612	88.0522	4.02434	71.0781	71.1049	62.3299	80.225	3.3065	71.4396	71.5433	61.858	81.4802	3.92813	-0.94101	0.350752	-0.538286	0.592633
n_ast_l	157.927	157.705	143.23	171.845	5.67404	157.879	157.384	146.016	172.281	5.03412	148.388	147.938	136.506	161.158	4.6913	148.27	148.482	136.55	159.673	5.18237	0.0528506	0.958013	0.130981	0.896266
n_ast_r	158.269	158.874	140.731	170.764	5.34334	159.019	158.896	150.13	174.701	5.38312	149.129	148.575	136.479	174.659	5.08905	148.715	148.946	137.029	164.324	5.07539	-0.791972	0.43156	0.463629	0.644613
n_b	113.067	113.167	97.65	128.184	5.51739	113.063	111.766	106.328	127.467	4.85682	107.927	107.952	96.2922	127.453	5.38883	107.016	107.571	97.8176	117.205	4.26326	0.00461786	0.99633	1.14929	0.254237
n_ba	107.493	107.449	95.8467	120.676	4.98623	108.649	108.22	97.1792	122.529	5.06528	100.841	101.467	89.3957	120.462	4.58233	101.646	101.453	93.0323	116.156	5.28838	-1.30063	0.198489	-0.886411	0.379336
n_d_l	18.9621	18.9021	13.9756	26.4381	2.07638	19.3812	19.0969	15.0549	26.1357	2.16246	17.8512	17.5278	11.9177	23.7836	2.27953	17.3336	17.0522	13.9193	21.242	1.94164	-1.10941	0.271876	1.46199	0.148399
n_d_r	19.1383	19.0493	13.3515	24.4093	2.2046	20.1067	20.1264	17.2962	26.2145	1.79342	17.8275	17.5673	11.756	23.7442	2.23292	17.9814	17.7294	13.8765	22.8592	2.21269	-2.92633	0.00461848	-0.394434	0.694671
n_ec_l	57.1896	57.0589	50.3582	66.4742	2.61079	58.063	57.753	52.3939	65.9844	2.78178	54.4261	54.6091	45.3322	63.8364	2.58173	54.451	54.6304	49.2737	58.8495	2.19148	-1.80446	0.0764807	-0.0622885	0.950517
n_ec_r	57.2368	57.615	51.303	63.7471	2.49497	58.7435	58.6513	54.5637	66.9438	2.53533	54.6316	54.761	48.852	61.5473	2.26476	54.9926	55.4666	49.3802	60.963	2.48209	-3.38629	0.00127201	-0.839793	0.404622
n_en_ba	108.494	108.399	96.7868	121.744	4.92415	109.57	109.287	98.039	123.174	4.97675	101.758	102.078	90.3138	121.067	4.50665	102.512	102.113	94.3085	117.081	5.273	-1.2312	0.223161	-0.834544	0.407689
n_eu_l	131.108	130.876	115.413	149.904	6.95744	129.758	128.382	119.826	143.015	5.44873	124.368	124.506	108.025	143.799	6.307	125.004	124.217	115.134	135.807	5.24321	1.32813	0.188283	-0.661414	0.510557
n_eu_r	131.68	131.604	118.088	151.521	6.71648	131.842	130.888	122.004	146.988	5.44287	125.401	125.521	109.769	142.35	5.80846	125.744	125.43	117.228	134.221	4.63737	-0.161354	0.872276	-0.398329	0.691576
n_foram_l	129.13	129.259	116.268	143.658	5.04277	130.329	130.226	120.038	144.577	5.57653	121.539	121.364	109.764	140.726	4.78841	122.307	123.481	111.133	138.184	5.78348	-1.24311	0.219075	-0.777655	0.440261
n_foram_r	129.112	129.47	115.267	143.109	5.04798	130.342	129.873	120.146	144.871	5.69884	121.563	121.641	111.052	140.428	4.74569	122.143	122.698	111.657	138.264	5.71406	-1.25253	0.215715	-0.594572	0.554678
n_ft_l	57.1032	57.3513	48.1614	64.3931	2.95526	57.7503	57.6007	49.6983	64.7487	3.15336	54.4384	54.5697	46.1602	65.5214	2.91725	54.4108	54.1651	48.3229	60.615	2.26833	-1.17971	0.243055	0.0650659	0.948299
n_ft_r	57.5587	57.8417	51.7439	64.2013	2.79876	58.4322	58.0403	52.3032	66.5374	2.63859	54.8541	54.6688	46.7784	62.6482	2.61895	55.1675	55.2509	50.0023	61.8551	2.4607	-1.85817	0.0679096	-0.714355	0.47769
n_ftm_l	58.2938	58.3011	51.0285	66.3378	2.94879	58.9599	59.098	50.9955	65.8602	3.13254	55.1578	55.1887	47.0822	66.4738	2.87857	55.0673	55.0516	49.6651	61.4322	2.23601	-1.22133	0.227012	0.21666	0.829075
n_ftm_r	58.5479	58.5749	50.2871	66.293	2.86572	59.8377	59.6143	54.674	66.6462	2.5779	55.6657	55.449	49.1319	63.5113	2.64153	55.8777	56.3382	50.1853	62.524	2.54644	-2.77972	0.00712999	-0.46944	0.640436
n_l	178.311	177.931	161.275	197.803	7.98536	178.613	177.887	165.537	198.8	7.01628	169.929	169.3	151.123	198.118	7.18155	169.822	169.839	154.796	188.209	7.80418	-0.237902	0.8127	0.0789269	0.937373
n_ms_l	134.536	134.637	115.226	151.089	5.56305	135.459	134.634	120.829	151.191	5.3742	125.734	125.806	113.431	139.772	4.55902	125.336	125.231	117.766	136.904	5.37919	-0.968733	0.336526	0.432332	0.667247
n_ms_r	135.067	135.797	118.656	149.396	5.03027	136.905	137.262	123.809	152.041	5.72533	126.24	126.117	114.925	145.636	4.46839	126.223	125.123	116.345	139.879	5.08795	-1.86599	0.0674465	0.0199769	0.984135
n_ns_l	54.5469	54.4479	45.0182	67.9669	2.88089	54.7802	54.9753	49.9685	62.7061	2.91466	51.3639	51.2229	45.3702	58.6871	2.637	51.8328	51.2322	46.7019	57.1118	2.60282	-0.455674	0.650307	-1.02086	0.311441
n_ns_r	54.2058	54.2413	43.8359	66.116	2.85131	54.7232	54.5334	49.3273	61.9856	2.75617	51.3507	51.2321	45.9662	58.0234	2.67409	51.9255	52.0046	45.8963	57.4574	2.71843	-1.05924	0.293693	-1.20491	0.233095
n_o	143.624	143.314	130.755	159.311	5.58754	144.862	144.715	133.871	157.294	5.87013	136.075	136.25	124.815	155.406	5.14614	136.366	136.336	127.312	150.154	5.47122	-1.20914	0.231589	-0.305275	0.761275
n_op_n	181.928	181.603	165.71	202.296	8.25504	182.582	180.764	171.104	202.743	7.07471	173.207	172.694	156.316	201.484	7.1481	173.291	171.845	159.085	192.185	8.42293	-0.508053	0.613087	-0.0580154	0.953954
n_orb_d_l	45.61	45.6037	39.9779	55.5488	2.66574	46.1956	46.4314	39.7103	53.0509	2.64907	43.6882	43.5201	36.6263	51.5496	2.42377	43.8124	43.8991	38.9832	48.297	2.4665	-1.25425	0.214666	-0.287073	0.775073
n_orb_d_r	44.9608	45.1197	37.8505	52.9782	2.4572	46.1636	45.931	39.0587	52.0773	2.60271	43.2529	43.5937	35.917	49.1317	2.4383	43.6009	43.6366	38.6743	48.6157	2.62645	-2.65323	0.0103192	-0.762728	0.448815
n_orb_u_l	32.2928	32.1736	26.6808	37.7097	1.94406	32.4935	32.5112	28.7575	38.041	1.95799	31.1482	30.8981	26.0346	38.1545	1.99961	30.9694	31.07	27.4927	34.584	1.73802	-0.583182	0.562	0.567168	0.572521
n_orb_u_r	32.0798	32.2472	26.7531	36.6156	1.82872	32.6961	32.6885	29.5856	36.5819	1.60152	30.9527	30.9487	26.5391	35.8427	1.69748	31.202	31.3054	27.2664	36.2017	1.7973	-2.12448	0.0373994	-0.796365	0.429134
n_po_l	116.238	116.667	105.157	129.621	4.50902	116.679	116.573	107.841	129.863	4.34298	110.12	110.045	99.0593	121.086	3.80542	109.767	109.511	99.8356	117.802	4.2201	-0.57275	0.568927	0.484581	0.629891
n_po_r	117.49	118.04	107.968	126.596	4.21708	118.174	117.581	108.288	131.379	4.4623	111.595	111.466	101.313	125.454	3.84963	110.947	110.802	102.955	118.637	3.75126	-0.880728	0.382173	0.976666	0.33264
n_ra_l	113.778	113.691	98.0379	126.491	4.77176	114.174	113.682	105.017	129.053	4.58867	105.765	106.12	94.2144	119.891	4.33611	105.521	105.551	96.6185	113.857	4.79298	-0.486239	0.628544	0.294451	0.769516
n_ra_r	113.33	113.682	99.8728	126.42	4.97602	113.814	113.358	104.82	127.374	4.51946	105.935	106.018	95.5456	123.987	4.29236	105.675	105.829	97.4741	118.538	4.67956	-0.597224	0.552476	0.320467	0.749812
n_zma_l	74.2122	74.3987	63.1307	85.1664	3.78986	75.0159	75.3928	66.7739	82.756	4.00577	68.9988	69.0637	59.8993	81.1657	3.52516	69.2733	69.0449	61.6209	77.0934	4.06556	-1.15144	0.254366	-0.393132	0.695773
n_zma_r	74.2847	74.337	64.4047	85.3056	3.87737	75.3062	75.6079	67.5241	87.0561	4.38665	69.3987	69.7848	60.5648	78.7165	3.52135	70.2388	69.4552	63.972	78.9774	4.07923	-1.35165	0.18207	-1.19982	0.235471
n_zo_l	43.3469	43.3443	33.2559	52.4435	3.25244	44.9211	44.7811	38.45	52.4848	3.6329	42.4083	42.336	34.5523	51.9693	3.31144	42.5392	42.1995	37.8849	48.8638	2.7843	-2.51023	0.0150401	-0.256963	0.797982
n_zo_r	41.7048	41.7947	32.0171	50.1694	3.46248	42.9828	42.2193	37.108	50.1239	3.18667	40.8799	41.1361	31.2471	51.8152	3.72326	42.3064	42.5246	32.6818	49.8763	4.01194	-2.23946	0.0286647	-2.04757	0.0452876
n_zy_l	97.7374	97.8179	87.3739	106.417	3.78625	98.7328	98.7054	87.863	110.725	4.38738	91.652	91.4563	81.865	99.7518	3.62009	92.2808	92.1623	82.408	101.694	3.88978	-1.32185	0.191816	-0.9305	0.356086
n_zy_r	98.5346	98.5262	87.7592	109.687	4.03617	99.8972	99.5687	91.0113	111.935	4.00931	91.909	91.492	81.9339	101.725	3.37975	92.4912	92.7724	83.4282	100.881	3.66386	-1.92812	0.0586234	-0.915894	0.363652
ns_l_al_l	11.3317	11.1734	7.79104	16.4078	1.56005	11.1841	11.395	7.66903	15.6258	1.69156	11.3288	11.0996	6.82517	15.9549	1.78906	11.1281	11.2047	4.84675	14.1547	1.98802	0.503102	0.616867	0.584315	0.561393
ns_l_al_r	19.8406	19.8594	15.4483	23.6956	1.69203	19.5078	19.5002	15.9259	23.0087	1.7557	19.4819	19.2568	14.5234	28.1683	2.12492	19.5304	19.5837	13.7581	23.8704	2.03678	1.0841	0.282837	-0.134289	0.893616
ns_l_b	156.76	157.031	141.734	170.701	5.48331	156.768	157.502	148.435	170.142	4.90427	149.719	149.47	138.495	170.095	5.56447	149.212	150.082	139.488	160.7	5.10734	-0.00814116	0.993529	0.554638	0.581102
ns_l_d_l	48.0042	48.2405	39.8037	56.0135	2.95364	48.0546	48.2095	41.3747	55.6343	3.73432	44.2995	44.3464	35.2631	56.6164	3.80475	45.0421	45.3223	38.6996	52.224	3.38582	-0.0797303	0.936762	-1.21555	0.228568
ns_l_d_r	50.9425	50.7719	40.783	60.5164	2.99512	50.752	50.5006	44.3289	57.8285	3.98245	46.9201	47.1362	38.8427	56.6621	3.52242	47.3499	46.6597	42.0689	54.4274	3.50723	0.28395	0.77762	-0.695605	0.489393
ns_l_ec_l	64.0353	64.2781	56.5137	71.3498	2.95284	64.5797	64.6627	58.4951	71.3226	2.86231	60.949	60.9642	52.1821	71.5375	3.10732	61.2147	61.4989	54.9849	65.2612	2.27903	-1.07379	0.28718	-0.61325	0.541499
ns_l_ec_r	71.8538	72.0608	62.6372	77.2444	2.69886	72.4478	71.8772	67.0111	78.2853	2.39197	69.0503	68.9256	62.5959	76.8366	2.7051	68.7652	68.8263	63.0749	72.6892	2.34541	-1.37476	0.173928	0.669471	0.505522
ns_l_ft_l	80.314	80.6846	67.3029	92.0654	4.09134	81.3011	80.9343	74.2177	88.4933	3.72227	75.7169	75.4542	65.9712	88.3071	4.16008	76.6432	76.3501	67.7607	87.6168	4.26753	-1.47698	0.144617	-1.23903	0.22032
ns_l_ft_r	86.8771	87.0364	74.7918	96.8555	3.66673	87.267	86.7375	80.2908	94.829	3.04342	82.1857	81.8886	72.2225	93.4842	3.53376	82.5702	82.5357	75.6321	93.559	4.05071	-0.697941	0.487564	-0.552141	0.583126
ns_l_ftm_l	71.5539	71.7907	62.3864	79.8532	3.29504	71.8914	71.345	64.9821	78.828	3.28363	68.1936	67.9594	58.8237	77.2308	3.25549	68.1295	68.1161	63.0078	72.7396	2.75567	-0.583394	0.561842	0.12741	0.898994
ns_l_ftm_r	79.3577	79.573	68.277	86.8644	3.07624	79.5473	79.8286	74.7274	87.3884	2.66418	76.0167	75.9335	68.2381	84.7941	2.83112	75.7926	75.5972	70.1922	81.5332	2.76729	-0.391797	0.696465	0.45814	0.648504
ns_l_l	191.347	190.812	170.102	210.257	8.13102	191.644	191.369	181.581	209.625	7.12824	183.375	183.021	163.463	202.405	7.44707	183.357	182.781	166.774	197.726	7.95401	-0.23031	0.818568	0.0129204	0.989737
ns_l_ms_l	113.758	113.483	97.1651	126.76	5.12055	114.47	113.838	106.674	122.454	4.01496	107.455	107.441	90.2617	126.285	5.04748	106.258	105.829	95.5744	117.179	5.62357	-0.951528	0.344489	1.23336	0.222685
ns_l_ms_r	119.595	120.286	105.954	129.355	4.4546	120.789	121.023	102.149	129.258	4.98688	113.024	113.186	99.8245	125.668	4.27645	111.99	112.15	104.012	125.016	4.7241	-1.38758	0.170875	1.26611	0.21078
ns_l_ns_r	10.4936	10.3766	5.30504	14.7796	1.90269	10.2207	10.1605	5.54515	15.8131	2.05578	10.4515	10.4264	5.63591	18.101	2.47151	10.1721	10.3681	6.05363	14.6482	2.43296	0.76466	0.447679	0.650298	0.51799
ns_l_orb_d_l	36.3092	36.2065	30.1782	42.395	2.4945	36.4529	36.3028	30.8754	42.8647	2.55025	34.1505	34.2205	27.0547	41.5143	2.5847	34.3517	34.6382	30.3305	38.051	2.13346	-0.321503	0.748981	-0.513126	0.609497
ns_l_orb_d_r	44.2416	44.3601	36.6912	49.4706	2.27462	44.1305	44.203	39.5784	49.2782	2.0735	42.1364	42.1436	37.4383	48.0853	2.1285	41.8382	41.6841	37.6781	46.0939	1.9968	0.298649	0.766184	0.837453	0.405553
ns_l_orb_u_l	62.934	63.014	53.1357	71.9501	3.1959	63.3535	63.0644	57.4278	68.5295	3.14752	60.4181	60.1291	52.7412	70.3681	2.92728	60.6569	60.4696	56.2993	65.5742	2.62106	-0.754833	0.453313	-0.505424	0.614986
ns_l_orb_u_r	68.0272	68.3367	58.1326	77.1925	2.9235	68.1619	68.2918	63.8545	73.512	2.55235	65.3813	65.3408	57.4534	71.9601	2.90019	65.5374	65.5276	60.611	70.9686	2.37757	-0.291014	0.771955	-0.356484	0.722556
ns_l_po_l	107.761	107.741	96.4219	118.448	4.66988	108.443	108.191	98.3127	116.145	4.00441	102.57	102.821	90.326	112.656	4.1007	102.172	102.773	92.7276	109.928	4.22574	-0.934803	0.353253	0.538468	0.592319
ns_l_po_r	114.906	115.238	102.358	126.701	4.22733	115.207	115.096	99.1316	122.227	4.09626	109.876	109.75	98.6175	119.207	3.79176	108.772	109.05	100.357	115.024	3.381	-0.414737	0.679801	1.80973	0.0749857
ns_l_zma_l	47.4354	47.66	36.7244	57.5786	3.52167	48.1119	47.9304	40.9441	57.8398	3.25619	44.7279	44.7775	37.68	53.5999	3.3607	44.5451	45.0556	38.3345	51.6077	3.44224	-1.16144	0.24986	0.302973	0.762992
ns_l_zma_r	57.0683	57.1027	46.9291	64.9601	3.45572	57.1172	57.3834	51.004	64.5796	3.59243	54.6683	54.5283	46.5118	64.7543	2.94656	54.3267	54.0781	48.7379	62.1498	3.00345	-0.0779792	0.938115	0.64853	0.519187
ns_l_zo_l	34.3491	34.4438	26.7938	41.4156	2.783	35.0292	35.2632	29.0821	42.2583	2.82678	32.164	32.1025	23.1093	40.0845	3.01279	32.2221	32.529	25.6158	37.0985	2.54523	-1.3708	0.175677	-0.124835	0.901024
ns_l_zo_r	41.385	41.3143	31.5352	48.1287	2.7369	41.0908	40.655	36.2229	47.7468	2.46895	39.3684	39.1043	31.4509	46.9886	2.86418	39.817	39.8417	32.8272	45.3255	2.95162	0.662343	0.510128	-0.868317	0.388807
ns_r_al_l	19.3633	19.2671	15.1734	25.2781	1.84695	19.2784	19.0415	15.978	22.6955	1.45821	19.3409	19.1677	14.5644	26.1	2.00602	19.0157	18.8964	12.9892	23.6056	2.16164	0.313155	0.755065	0.866368	0.389973
ns_r_al_r	11.4962	11.469	7.38338	14.7443	1.54463	11.3305	11.2147	7.81717	14.5003	1.4611	11.5207	11.5091	7.00924	16.9901	1.85855	11.7177	11.6314	5.30069	15.6721	1.96786	0.637232	0.526333	-0.574593	0.567834
ns_r_b	156.647	156.581	141.435	171.214	5.55979	156.832	156.863	149.21	171.183	4.70491	149.784	149.879	139.177	169.46	5.6875	149.47	150.466	140.387	161.872	4.98157	-0.216023	0.82962	0.347537	0.7293
ns_r_d_l	50.3936	50.4707	41.722	57.0437	2.88213	50.6291	50.7566	43.9021	57.2585	3.31944	47.0029	47.0052	37.8752	58.2417	3.45906	47.7304	47.7431	41.6564	55.6146	3.01196	-0.413017	0.681232	-1.33169	0.187544
ns_r_d_r	48.057	48.1211	38.8018	57.0799	3.06252	48.0318	48.0386	40.1733	54.8223	4.00704	44.2507	44.4084	35.0461	55.4219	3.88264	44.9053	44.5778	38.0353	52.4261	3.66945	0.0373524	0.970351	-1.00188	0.320315
ns_r_ec_l	71.6885	72.1121	63.2838	79.3055	2.8447	72.1872	72.1261	67.5405	77.8918	2.73871	68.7807	68.7022	61.5999	76.9889	2.84149	68.9258	69.0121	64.6528	73.22	2.23694	-1.02655	0.308699	-0.348318	0.728612
ns_r_ec_r	64.0216	64.0786	54.6372	72.0272	2.97842	64.8532	64.3385	59.2897	69.8699	2.63897	61.3079	61.3162	53.8211	71.2201	3.02588	61.3657	61.4487	54.8202	66.3081	2.89134	-1.74473	0.0857575	-0.112401	0.910874
ns_r_ft_l	86.4342	86.848	72.6535	97.6603	3.92176	87.4104	87.2617	81.3137	95.5587	3.43031	82.2013	82.3628	73.9319	92.1655	3.54165	82.986	82.5987	76.3958	91.9231	3.63671	-1.57073	0.121047	-1.23194	0.222939
ns_r_ft_r	80.432	80.6536	67.8394	91.6821	3.83871	81.0855	80.7772	72.926	89.4594	3.29651	75.7191	75.7668	65.6281	88.3986	4.30406	76.4641	75.2016	67.502	89.1329	4.65051	-1.08928	0.279946	-0.922903	0.360011
ns_r_ftm_l	78.8514	79.1569	68.944	87.6775	3.20183	79.1769	78.9603	74.343	87.016	2.78356	75.6488	75.5779	67.6826	84.9415	3.0599	75.4759	75.3738	69.91	80.6921	2.66937	-0.644541	0.521456	0.357167	0.722109
ns_r_ftm_r	71.8127	71.9849	60.6684	81.0922	3.29352	72.226	71.4494	67.8505	79.4657	2.91672	68.6087	68.8629	58.5732	77.7933	3.25279	68.7158	68.7328	62.0505	74.5295	3.05566	-0.784341	0.435688	-0.196557	0.844817
ns_r_l	191.49	190.623	171.271	210.402	8.33814	191.802	190.974	181.198	210.094	7.147	183.535	183.155	162.554	203.849	7.53615	183.856	184.05	166.187	197.798	7.88874	-0.240193	0.810915	-0.233539	0.816176
ns_r_ms_l	119.006	118.832	101.691	132.129	5.1138	119.447	118.839	112.462	130.058	4.17028	112.526	112.647	94.3727	130.751	4.68117	111.559	112.086	103.327	121.961	4.83359	-0.574408	0.567533	1.14266	0.257891
ns_r_ms_r	114.86	115.224	100.419	128.282	4.77044	116.059	115.735	97.2933	126.844	5.30856	108.148	108.439	92.9116	122.91	4.72354	107.51	106.366	98.1724	119.28	5.15169	-1.30816	0.196253	0.71385	0.478297
ns_r_orb_d_l	44.242	44.1977	38.0836	50.4691	2.39547	44.3394	43.9527	39.6145	51.0702	2.31634	42.384	42.4558	37.1748	48.4727	2.2917	42.43	42.186	37.4445	47.5609	2.2147	-0.237193	0.813307	-0.117295	0.907014
ns_r_orb_d_r	36.1731	36.3132	28.394	41.217	2.50265	36.2363	36.1086	33.1014	40.6108	2.04208	34.0215	34.1084	27.2513	41.1126	2.47333	34.0825	33.7956	29.1568	38.8355	2.51581	-0.167899	0.867147	-0.138276	0.890498
ns_r_orb_u_l	67.625	67.8288	57.0048	74.9467	2.99411	68.154	68.2402	63.5538	73.5341	2.74391	65.3904	65.3016	58.0282	73.4994	2.80072	65.5376	65.1997	59.4582	71.0105	2.64119	-1.07565	0.286171	-0.312939	0.755381
ns_r_orb_u_r	62.8659	63.082	52.3365	71.3304	3.05425	63.2739	63.3672	56.5047	69.2549	2.79666	60.4381	60.4174	53.3068	69.092	3.08975	60.842	60.9088	56.9993	66.0615	2.48507	-0.813635	0.418906	-0.87803	0.382892
ns_r_po_l	113.525	113.537	102.14	125.236	4.73093	113.997	114.228	104.387	122.382	3.75285	108.358	108.759	95.8661	117.697	3.85356	108.091	108.527	96.8326	115.641	3.87295	-0.676304	0.501018	0.391859	0.696576
ns_r_po_r	109.488	109.787	97.4659	121.258	4.48492	109.844	109.867	93.8757	117.6	4.31997	104.318	104.441	91.7691	114.03	4.07024	103.622	104.854	94.7874	109.715	3.89262	-0.464809	0.643729	1.00768	0.317581
ns_r_zma_l	56.8791	56.8711	45.3615	68.1685	3.40182	57.2916	57.1165	51.9716	63.0073	2.53118	54.1897	54.3467	47.2475	62.3908	2.87106	53.8531	54.0079	47.1418	58.6288	2.70166	-0.861155	0.391838	0.698993	0.487175
ns_r_zma_r	47.8983	48.0138	37.2138	57.4639	3.50865	48.0624	47.5924	41.8623	56.4405	3.79521	45.3548	45.3628	36.732	55.5241	3.34434	45.4269	45.8465	37.9663	55.2506	3.80575	-0.249195	0.804121	-0.109999	0.912815
ns_r_zo_l	41.9429	41.9283	33.0948	49.7051	2.8876	42.7344	42.1082	37.0474	50.0586	3.29426	40.2769	40.1172	32.8892	48.6676	2.93249	40.169	40.3321	33.942	44.0396	2.45593	-1.39656	0.168236	0.240028	0.811027
ns_r_zo_r	33.813	33.8979	24.783	40.2061	2.67721	33.6147	33.4298	28.5063	37.6972	1.86029	31.574	31.5398	23.9923	39.3722	2.76173	32.2118	32.097	25.9518	37.5033	2.87126	0.550936	0.583166	-1.2711	0.208807
o_al_l	127.506	127.098	114.039	140.403	5.66792	128.418	127.473	111.329	140.955	5.62731	121.54	121.486	108.607	135.405	5.01177	121.304	121.536	112.501	133.273	5.50367	-0.919281	0.361665	0.246976	0.805838
o_al_r	127.539	127.162	113.937	140.869	5.74511	128.44	127.32	111.412	140.068	5.74438	121.791	121.992	106.873	136.155	5.01924	121.674	120.724	113.91	133.341	5.12707	-0.891024	0.376528	0.129248	0.897607
o_alv	80.1432	80.191	69.078	90.4012	4.43284	80.6657	80.4934	68.702	92.4769	5.11225	76.9834	77.0427	67.4913	86.8202	3.95226	77.0054	77.4498	69.6697	86.6634	4.11245	-0.594988	0.554341	-0.0306125	0.975685
o_b	155.942	156.047	144.515	167.807	5.21653	156.571	157.025	142.474	167.529	5.64969	149.774	149.95	134.417	172.75	5.4106	149.538	149.103	140.373	160.294	4.95456	-0.641141	0.524046	0.266615	0.790633
o_d_l	130.445	130.828	117.127	144.246	5.26064	131.159	130.779	119.553	144.31	5.75614	123.968	123.949	113.23	144.339	5.16101	124.597	125.157	116.356	137.096	5.60503	-0.71627	0.47682	-0.647426	0.520006
o_d_r	130.25	130.441	117.47	143.127	5.36471	130.939	131.362	119.199	142.404	5.98983	124.01	123.698	112.497	143.85	5.12032	124.376	125.028	115.39	136.593	5.96572	-0.666841	0.507664	-0.357761	0.721928
o_ec_l	128.238	128.455	115.768	138.909	4.69345	128.527	128.775	121.045	137.922	4.40268	122.211	122.1	112.839	141.765	4.31188	122.444	122.059	114.29	131.372	4.08746	-0.367844	0.714242	-0.320605	0.749596
o_ec_r	127.628	127.846	115.292	138.26	4.64807	128.344	128.696	117.826	138.184	4.74274	122.169	122.302	111.689	137.392	4.27381	122.285	121.654	112.483	132.032	4.07791	-0.86142	0.392537	-0.160314	0.873161
o_foram_l	23.509	23.3575	16.4998	29.7065	2.55959	23.3756	22.8565	19.2141	29.0935	2.75726	22.8488	22.8661	16.6241	29.6227	2.214	22.7454	22.5741	18.0555	26.7933	2.166	0.278619	0.78156	0.270046	0.788051
o_foram_r	23.7624	23.7201	17.4777	31.2259	2.42089	23.9733	23.9044	18.0827	29.8903	2.41554	23.2709	22.9619	17.5645	29.8512	2.26687	23.204	22.9479	18.526	28.0733	2.05788	-0.495634	0.621987	0.180928	0.856999
o_ft_l	135.401	135.162	116.793	149.259	5.90501	135.974	136.168	123.89	146.735	4.77297	129.237	128.814	120.039	148.388	4.71798	129.881	128.843	123.155	145.046	4.99893	-0.64876	0.518598	-0.739304	0.462767
o_ft_r	135.012	135.197	116.657	149.829	5.63092	135.802	136.366	124.445	146.378	4.42182	129.011	128.448	116.798	145.615	4.72811	129.648	128.655	116.928	145.299	5.49516	-0.95957	0.340456	-0.67613	0.501862
o_ftm_l	133.495	133.971	121.997	145.586	4.98221	133.724	133.291	125.627	145.554	5.22546	127.644	127.407	117.791	147.202	4.61921	127.541	126.953	120.325	137.73	4.31762	-0.251794	0.802103	0.134369	0.893544
o_ftm_r	133.197	133.415	122.13	145.373	4.8664	133.591	133.258	122.089	145.28	5.30705	127.612	127.759	116.801	140.286	4.43249	127.836	127.402	116.936	139.062	4.48649	-0.42808	0.670242	-0.28395	0.77745
o_l	97.5991	97.7957	82.5194	114.708	6.35107	98.0025	96.9804	85.5251	114.903	6.69396	95.1512	94.9673	78.5246	115.469	6.49721	95.7584	96.0552	81.0204	114.391	5.97684	-0.345634	0.73089	-0.567224	0.572577
o_ms_l	62.1727	62.2131	54.0917	72.1419	3.27786	62.2147	61.7983	55.9859	72.22	3.35716	58.2876	58.2162	51.7012	64.7157	2.76971	59.3016	59.281	54.2587	68.9303	3.21007	-0.071413	0.943314	-1.84036	0.0712397
o_ms_r	62.4198	62.7163	51.4252	73.15	3.28699	63.2205	62.9792	53.992	70.647	3.30717	59.1025	59.1814	52.2099	69.7004	3.05261	59.652	59.3362	54.8858	65.362	2.31273	-1.37698	0.173732	-1.26216	0.210789
o_ns_l	128.1	127.954	113.706	142.673	5.79452	129.023	128.546	108.427	142.259	6.33947	122.045	122.218	107.105	136.42	5.36075	121.785	122.287	112.949	134.807	5.70974	-0.8401	0.404447	0.261689	0.794511
o_ns_r	128.397	127.93	114.011	143.375	5.89149	129.199	127.768	109.083	142.098	6.44542	122.201	122.611	106.809	136.168	5.38961	122.281	122.66	112.881	134.693	5.56019	-0.718904	0.475208	-0.0815951	0.93525
o_orb_d_l	125.914	126.222	112.171	137.62	5.34251	126.675	125.893	113.426	136.861	5.28446	119.981	119.929	107.311	135.451	4.78561	120.32	119.093	113.297	133.019	5.40454	-0.81609	0.417699	-0.364446	0.716934
o_orb_d_r	125.943	126.152	112.967	137.751	5.39164	126.739	126.661	113.588	136.156	5.34454	120.195	119.933	106.662	133.949	4.78727	120.447	120.692	112.701	134.189	5.02361	-0.843897	0.402107	-0.287443	0.774813
o_orb_u_l	141.471	141.362	128.506	151.917	5.04003	142.249	141.223	132.864	153.091	5.15406	135.047	134.969	123.941	154.744	4.62902	134.982	134.577	128.353	147.893	4.88417	-0.860388	0.393106	0.0770076	0.938887
o_orb_u_r	141.417	141.28	128.372	152.334	5.05524	142.478	142.599	130.165	152.791	5.34417	135.284	135.411	123.842	152.703	4.59974	135.389	134.74	125.893	149.031	4.95354	-1.1403	0.258938	-0.121998	0.903336
o_po_l	74.7005	74.8182	63.4548	85.2605	4.05968	75.2477	76.2988	67.7758	83.0245	4.05917	71.6545	71.4256	64.2122	81.0975	3.44641	72.2263	72.6123	64.867	80.1308	2.96651	-0.765792	0.446846	-1.05976	0.293079
o_po_r	75.032	74.9536	65.4051	83.7363	3.68619	76.2317	75.7228	69.259	82.6936	3.9414	72.1944	72.1067	63.2843	82.7396	3.38366	72.805	72.9545	67.0999	77.5431	2.62173	-1.75045	0.0854724	-1.24536	0.21695
o_zma_l	115.998	116.141	102.624	127.954	5.30572	116.845	116.876	104.845	126.978	4.90339	111.131	111.163	100.816	123.429	4.68815	110.971	110.482	103.166	120.285	4.59484	-0.965363	0.338067	0.197295	0.844264
o_zma_r	115.494	115.267	102.037	129.916	5.29963	116.809	116.94	104.209	125.605	4.82492	111.06	110.954	98.4703	122.927	4.60238	110.919	110.008	101.587	119.005	3.98268	-1.51747	0.134108	0.194947	0.84603
o_zo_l	126.045	126.351	112.914	137.572	5.3779	126.768	126.056	114.007	136.93	5.22559	120.321	120.151	107.62	135.86	4.85755	120.483	119.513	112.914	132.788	5.44083	-0.780986	0.437862	-0.17196	0.864102
o_zo_r	126.033	126.521	112.123	138.847	5.32416	127.1	126.547	114.816	137.145	5.33057	120.425	120.518	106.787	134.082	4.7952	120.635	120.827	112.723	133.772	5.03788	-1.13764	0.259864	-0.239067	0.811909
op_al_l	184.059	183.901	161.629	206.14	8.68769	184.4	183.191	174.343	205.124	6.74465	176.164	175.509	156.03	199.18	7.39535	175.434	174.599	156.808	190.561	8.39493	-0.270141	0.787809	0.504978	0.615614
op_al_r	184.064	183.696	160.987	205.862	8.83685	184.428	183.301	173.532	205.929	7.16749	176.407	175.72	155.557	198.604	7.42947	175.714	174.413	157.455	189.898	8.08718	-0.274991	0.784129	0.49409	0.623181
op_alv	144.002	143.958	122.558	166.016	8.15827	143.761	143.178	130.766	164.148	6.75111	139.054	138.822	120.208	159.64	6.84061	137.991	138.665	119.797	153.64	7.55266	0.194174	0.846609	0.814249	0.418993
op_ast_l	76.0953	76.0654	62.2287	91.0829	5.85149	75.5102	75.5059	60.1694	96.24	6.82543	75.1073	74.6733	60.8256	92.0289	5.78751	75.2282	75.4241	61.8534	89.5575	6.01071	0.49995	0.619158	-0.115023	0.908827
op_ast_r	77.1836	77.5932	61.6541	96.4562	6.22976	78.4547	77.5007	67.6367	96.4894	5.77363	76.0899	76.226	60.5386	89.6577	5.31378	75.4576	75.5281	63.1213	87.0271	5.44211	-1.23132	0.222806	0.663029	0.509932
op_b	136.996	136.898	111.251	159.5	8.47901	137.614	137.644	118.814	153.45	8.95588	130.177	129.822	108.374	156.376	8.93917	132.239	132.911	106.492	153.675	10.3732	-0.395903	0.693657	-1.15881	0.25166
op_ba	105.648	105.901	84.9557	125.347	7.64318	105.383	104.578	95.8625	125.682	6.26843	102.074	102.872	82.4543	122.041	7.12556	100.897	101.087	80.7614	114.096	7.28926	0.230146	0.818653	0.921392	0.360651
op_d_l	171.057	171.257	153.119	189.568	7.75525	171.172	169.3	160.887	189.625	6.82315	163.83	163.469	147.4	194.341	7.18351	164.097	162.278	151.225	184.21	8.48949	-0.0936144	0.925702	-0.184263	0.854508
op_d_r	170.797	170.359	153.33	188.744	7.65909	170.991	170.004	161.028	189.836	6.80348	163.996	163.913	148.495	193.353	7.03824	164.004	163.245	147.999	182.88	8.58084	-0.157778	0.875121	-0.00598702	0.995246
op_ec_l	168.311	168.693	150.027	186.842	7.41989	168.062	167.656	158.488	186.138	5.90081	161.004	161.19	145.704	190.394	6.64069	161.126	160.935	148.046	176.608	7.32523	0.227773	0.820471	-0.0959858	0.923879
op_ec_r	167.891	168.023	152.779	187.058	7.49982	168.032	166.537	158.59	186.569	6.30848	160.98	161.156	145.047	184.749	6.43067	160.978	160.808	145.88	175.109	6.85297	-0.121795	0.903421	0.00138166	0.998902
op_en_ba	103.997	104.124	82.812	124.027	7.67378	103.895	103.371	94.5212	124.585	6.31382	100.512	101.255	81.1865	120.665	7.13239	99.414	99.5593	79.0242	112.964	7.25756	0.0873815	0.93062	0.861889	0.392274
op_eu_l	107.304	106.903	93.1022	119.802	5.20939	108.337	109.16	95.0053	117.836	5.84997	102.995	103.359	92.1035	147.833	5.8366	103.461	103.15	94.5816	117.826	5.01754	-1.02414	0.310273	-0.509971	0.611755
op_eu_r	108.08	108.006	93.9939	121.09	5.44317	110.774	112.21	96.7601	119.943	5.86397	104.182	104.098	92.2348	145.896	5.81392	104.475	105.113	92.3699	119.619	5.27023	-2.64569	0.0105533	-0.309719	0.757785
op_foram_l	93.17	93.5936	70.4773	111.769	7.59355	92.5539	92.327	80.5539	110.494	6.38584	91.0251	91.682	72.2658	110.412	7.29243	89.5867	89.8501	65.7996	107.401	8.02348	0.527392	0.599637	1.03597	0.304714
op_foram_r	92.9389	93.1331	70.4476	113.472	7.68605	92.4509	91.9917	80.0294	111.346	6.21178	90.7998	90.7736	71.8806	110.089	7.45259	89.5295	89.2657	65.3405	106.873	8.02945	0.42495	0.672165	0.910964	0.366206
op_ft_l	165.068	165.781	148.519	183.66	6.97001	164.778	165.093	156.61	175.907	5.03886	158.308	158.337	142.303	185.446	6.30265	159.001	158.041	146.772	177.387	7.18236	0.301075	0.764148	-0.560473	0.577463
op_ft_r	164.881	165.49	147.292	183.271	6.95007	165.069	164.777	154.439	175.973	5.62548	158.395	158.219	144.035	181.026	6.00476	158.951	157.536	148.12	178.131	7.00031	-0.181553	0.856455	-0.462717	0.645441
op_ftm_l	169.562	169.756	152.399	188.032	7.13993	169.357	169.601	159.592	185.94	5.90293	162.309	162.109	147.411	193.278	6.66157	162.403	161.687	150.768	177.647	7.18767	0.18842	0.851099	-0.0757014	0.939926
op_ftm_r	169.356	169.236	154.824	189.104	7.20185	169.362	167.961	161.526	186.556	6.30717	162.357	162.461	147.638	185.12	6.26944	162.596	161.64	151.268	178.39	6.66178	-0.00528903	0.995796	-0.206076	0.83747
op_l	25.4281	24.4534	5.16314	56.3216	9.49237	26.7382	26.1997	5.29287	52.6844	11.0365	23.6749	22.9619	2.95758	57.9364	9.64778	27.5732	27.897	3.39202	54.8332	11.398	-0.691968	0.491942	-1.99839	0.0507992
op_ms_l	116.395	116.672	99.1635	134.787	7.18129	116.115	116.067	99.425	133.238	6.66311	111.12	111.057	94.0035	129.655	6.85935	111.276	110.804	93.0166	128.829	7.65888	0.234942	0.815021	-0.117677	0.906753
op_ms_r	116.615	117.276	98.2792	140.689	7.40718	116.643	116.124	100.807	133.41	6.78298	111.546	111.15	95.0545	129.981	6.84929	111.157	111.728	91.0933	127.434	7.48469	-0.0223782	0.982217	0.300061	0.765248
op_n	182.074	181.579	165.376	202.912	8.2775	182.629	180.911	171.786	202.371	7.13988	173.206	172.685	155.951	202.669	7.24227	173.406	171.437	158.9	192.737	8.55863	-0.427537	0.670369	-0.136306	0.892095
op_ns_l	187.811	187.643	165.102	207.409	8.837	188.004	186.897	178.348	208.092	7.21438	179.994	179.482	159.51	201.356	7.62452	179.052	178.637	157.957	196.059	8.67224	-0.144934	0.88518	0.63121	0.530549
op_ns_r	188.006	187.675	164.162	207.527	9.06844	188.164	186.509	177.608	208.636	7.31091	180.16	180.137	158.832	201.196	7.71321	179.544	179.569	158.204	193.771	8.58857	-0.117117	0.907099	0.415224	0.679592
op_o	80.2573	80.657	56.9666	101.752	8.16549	79.6349	79.9419	65.326	103.233	7.59446	78.9622	79.0588	60.1668	99.7491	7.69605	76.8982	75.8396	52.4735	94.0738	8.44952	0.458697	0.648044	1.4111	0.163793
op_op_n	5.69021	5.56898	2.79165	9.65797	1.24956	5.90069	5.6581	3.65811	9.23106	1.22955	5.65713	5.32505	2.47543	14.5206	1.87447	5.85435	5.46951	2.7854	13.6854	2.30741	-0.969382	0.336258	-0.502334	0.617553
op_orb_d_l	175.736	175.232	156.701	196.122	8.15025	175.964	174.632	164.772	196.834	6.64471	168.607	168.063	151.217	195.116	6.94977	168.497	167.308	150.984	184.785	8.2326	-0.185869	0.853085	0.0786088	0.937639
op_orb_d_r	175.755	175.301	157.838	197.145	8.25602	176.121	174.415	165.561	197.488	6.98404	168.856	168.184	150.096	192.135	6.90209	168.625	168.741	150.117	183.696	7.89733	-0.286684	0.77523	0.170465	0.86528
op_orb_u_l	177.104	176.577	159.862	196.364	7.76165	177.21	176.319	167.838	192.778	6.47005	169.048	168.372	152.05	199.421	7.07007	169.124	168.009	156.456	188.229	8.09946	-0.0898781	0.928646	-0.0540985	0.957056
op_orb_u_r	177.058	176.837	160.737	195.994	7.89633	177.554	176.005	168.667	195.967	6.91761	169.358	168.97	154.38	196.561	6.9266	169.484	168.439	157.4	188.474	7.74576	-0.39559	0.69369	-0.093516	0.925834
op_po_l	112.569	112.86	97.2388	127.689	6.56275	112.178	112.879	99.104	129.171	6.16172	108.92	108.943	94.338	122.439	5.57973	108.775	107.925	93.0384	119.338	5.95935	0.355982	0.723063	0.139549	0.889513
op_po_r	112.462	113.161	95.7033	132.296	6.6531	113.027	112.457	103.983	129.963	6.08105	108.917	109.048	97.7053	120.115	5.23561	108.786	108.636	93.3499	117.841	5.66687	-0.518562	0.605873	0.133256	0.894468
op_ra_l	119.497	119.512	106.144	136.142	6.0953	119.066	118.578	107.637	135.669	5.57743	116.84	116.455	99.2756	133.684	6.4551	116.556	115.566	98.9501	134.063	6.63911	0.430572	0.668242	0.244669	0.807577
op_ra_r	120.595	120.786	102.724	138.89	6.19284	121.546	120.384	111.411	141.005	5.67197	117.531	117.561	102.147	133.941	6.12781	117.327	116.423	102.612	135.692	6.38291	-0.935249	0.353217	0.182915	0.855509
op_zma_l	172.378	172.408	153.03	190.737	8.11587	172.622	172.692	161.694	190.358	6.01988	165.594	165.391	148.049	188.892	6.85686	164.818	164.97	148.055	180.375	7.53007	-0.214524	0.830707	0.595235	0.554105
op_zma_r	172.029	172.285	151.33	192.445	8.12331	172.839	172.008	163.918	191.369	6.18243	165.588	165.824	147.081	183.322	6.89975	164.805	165.007	146.837	178.48	6.97007	-0.696933	0.488002	0.639292	0.52512
op_zo_l	175.959	175.861	158.341	195.203	8.108	176.206	174.975	165.308	195.264	6.39364	169.309	168.751	151.682	195.863	6.91211	169.06	167.703	152.902	185.559	8.38134	-0.207645	0.83609	0.173801	0.862691
op_zo_r	175.834	175.316	158.295	196.471	8.13636	176.554	174.283	166.538	196.7	6.84652	169.344	169.101	150.909	192.573	6.98029	169.125	169.029	150.426	184.101	7.97013	-0.57489	0.567262	0.159355	0.873981
op_zy_l	143.677	143.882	124.107	163.282	6.85676	143.187	143.069	133.383	158.569	5.72423	137.692	137.517	120.282	160.708	6.5031	136.77	136.878	121.115	154.711	8.04886	0.467357	0.641728	0.673631	0.503538
op_zy_r	143.281	143.303	125.302	163.169	7.13911	143.671	143.523	134.839	159.032	5.54935	137.953	138	122.366	159.642	6.30528	137.424	137.26	124.301	154.558	7.34565	-0.375222	0.708578	0.420051	0.676128
op_n_al_l	182.517	182.352	159.083	204.48	8.77101	182.89	181.866	173.232	204.37	6.79643	174.811	174.034	154.486	196.535	7.41203	173.9	173.113	155.187	189.636	8.3337	-0.293782	0.769751	0.634542	0.528372
op_n_al_r	182.523	181.896	158.52	204.24	8.91418	182.918	181.917	171.694	205.198	7.22258	175.059	174.273	154.02	197.084	7.44515	174.187	173.335	155.833	188.984	8.04773	-0.296094	0.768029	0.624248	0.534996
op_n_alv	141.629	141.562	119.45	163.854	8.25102	141.402	140.595	128.384	162.793	6.89094	136.88	136.985	118.097	157.939	6.91312	135.632	135.899	117.573	152.375	7.69324	0.179678	0.857936	0.938906	0.35188
op_n_ast_l	74.0811	74.1185	60.643	88.5603	5.67729	73.4938	73.8704	59.0902	94.4055	6.6727	73.1353	72.6628	58.7169	90.7288	5.66483	73.3159	73.42	60.4543	88.1975	5.89919	0.513885	0.609455	-0.175276	0.861479
op_n_ast_r	75.1762	75.3922	59.3332	93.4273	6.02665	76.4296	75.1274	66.8263	94.6736	5.70794	74.1578	74.2874	58.2161	86.6527	5.0804	73.559	73.3888	61.787	85.5683	5.33636	-1.23387	0.221941	0.6433	0.522603
op_n_b	140.376	140.432	115.519	162.566	8.40939	141.185	140.716	123.026	157.311	8.65686	133.656	133.869	111.796	159.5	8.87892	135.685	136.644	110.7	155.961	10.3084	-0.533721	0.595577	-1.14674	0.256572
op_n_ba	102.61	103.196	81.436	122.488	7.72412	102.302	102.485	92.771	123.615	6.40113	99.2428	99.8823	78.2693	119.381	7.26906	97.8594	98.6904	78.5331	112.07	7.46116	0.261257	0.794673	1.05852	0.294202
op_n_d_l	170.66	170.611	153.204	189.402	7.76513	170.855	169.358	159.636	189.806	6.79529	163.562	163.155	146.949	192.876	7.12536	163.714	162.278	150.99	183.517	8.38495	-0.15883	0.87429	-0.106231	0.915798
op_n_d_r	170.4	170.311	153.421	189.281	7.679	170.664	169.277	161.02	190.089	6.70106	163.719	163.339	148.035	191.924	6.98942	163.614	162.981	147.811	182.23	8.4983	-0.217563	0.828442	0.0723603	0.942591
op_n_ec_l	167.726	167.971	149.994	185.918	7.39393	167.537	167.296	159.3	186.077	5.83465	160.566	160.618	144.543	188.801	6.58694	160.564	160.074	147.753	175.722	7.21076	0.17469	0.861812	0.00177405	0.998591
op_n_ec_r	167.285	167.489	151.761	186.204	7.4846	167.492	165.768	158.518	186.513	6.26352	160.538	160.491	144.224	183.234	6.39055	160.404	160.293	145.579	174.286	6.74453	-0.179979	0.857702	0.11388	0.909734
op_n_en_ba	100.949	101.389	79.2999	121.369	7.75676	100.806	101.023	91.469	122.499	6.44257	97.6717	98.3905	77.0616	117.997	7.26328	96.3715	97.4073	76.8504	110.828	7.43829	0.120922	0.904105	0.997484	0.322663
op_n_eu_l	108.168	107.776	92.6072	122.196	5.35187	109.313	110.45	95.2637	118.385	6.01117	103.847	104.231	92.6345	148.499	5.84983	104.299	104.235	95.2482	118.225	5.0895	-1.10457	0.274175	-0.490365	0.625501
op_n_eu_r	108.936	108.923	94.9978	122.603	5.5918	111.737	113.183	97.0274	120.995	6.05533	105.034	105.082	93.2891	146.593	5.83165	105.326	105.79	93.0681	120.007	5.24973	-2.66612	0.0100099	-0.309094	0.758252
op_n_foram_l	89.4447	89.5754	66.1176	107.564	7.70244	88.7543	88.5938	77.1689	107.783	6.58673	87.4869	87.4316	67.0864	107.282	7.48679	85.8238	85.684	62.5089	104.635	8.3078	0.575327	0.566996	1.15847	0.251663
op_n_foram_r	89.2279	89.7859	65.9899	109.225	7.79996	88.6666	88.6955	76.6737	108.631	6.40445	87.2773	87.3301	66.4718	106.941	7.62824	85.7917	85.4296	62.0842	104.085	8.3255	0.476183	0.635436	1.02979	0.307557
op_n_ft_l	165.224	165.713	147.988	183.308	6.94867	165.054	165.293	157.154	176.426	5.0055	158.572	158.498	142.658	184.703	6.20156	159.213	158.111	147.294	177.277	7.08111	0.177714	0.8594	-0.526766	0.600505
op_n_ft_r	165.017	165.479	147.606	182.989	6.9197	165.305	165.038	153.623	175.961	5.5092	158.632	158.48	144.852	180.401	5.90992	159.135	157.717	148.135	178.059	6.91081	-0.282177	0.778621	-0.424032	0.673244
op_n_ftm_l	169.261	169.367	152.656	187.361	7.12201	169.121	168.951	160.006	186.177	5.86373	162.173	161.996	146.659	191.898	6.59279	162.147	161.1	150.769	176.938	7.07286	0.130219	0.89677	0.021123	0.983222
op_n_ftm_r	169.043	168.847	154.816	188.482	7.19321	169.108	167.485	160.912	186.799	6.27165	162.212	162.247	146.804	183.782	6.21747	162.345	161.665	151.364	177.87	6.54993	-0.0563705	0.955217	-0.116512	0.907656
op_n_l	30.9189	29.592	9.88517	61.3127	9.60883	32.433	31.668	10.163	59.9808	11.1472	29.1374	28.0136	6.57563	65.057	9.84604	33.2286	32.7256	6.6465	59.6484	11.5638	-0.791509	0.432128	-2.06545	0.0437543
op_n_ms_l	113.186	113.398	95.7437	131.918	7.25244	112.844	112.925	97.0909	130.884	6.80519	108.109	108.034	91.6368	127.756	6.99202	108.109	107.554	90.1738	127.024	7.7945	0.281832	0.779011	-0.000184101	0.999854
op_n_ms_r	113.376	113.781	94.6315	137.031	7.51712	113.359	112.773	95.7276	131.231	7.0099	108.539	108.276	92.6051	128.029	6.94599	107.993	108.39	88.4823	125.55	7.59244	0.0138619	0.988984	0.414468	0.680124
op_n_ns_l	186.034	186.029	162.204	206.254	8.92333	186.264	185.247	176.339	207.168	7.30342	178.405	178.157	157.389	200.311	7.64279	177.267	176.7	156.119	195.007	8.68955	-0.170855	0.864833	0.760333	0.450341
op_n_ns_r	186.238	186.104	161.28	205.867	9.15264	186.425	184.62	175.42	207.73	7.4414	178.571	178.235	156.756	200.145	7.73046	177.763	177.473	156.309	192.695	8.59081	-0.136061	0.892163	0.544341	0.588403
op_n_o	75.9045	76.1812	51.6727	97.1127	8.38324	75.1782	74.9159	61.0058	99.9849	7.83392	74.7589	74.9476	54.7951	96.1784	7.95556	72.484	72.1543	48.3522	90.7999	8.81546	0.51946	0.605283	1.49291	0.141154
op_n_orb_d_l	174.607	174.302	156.201	194.85	8.18614	174.881	174.168	164.933	196.411	6.62864	167.625	166.899	149.475	192.814	6.9545	167.355	166.187	149.978	183.456	8.19189	-0.223343	0.823915	0.19239	0.848169
op_n_orb_d_r	174.629	174.382	156.19	195.922	8.30675	175.033	173.46	164.926	197.117	6.96556	167.877	167.331	148.86	189.897	6.91355	167.488	167.448	149.121	182.311	7.86834	-0.316691	0.752445	0.287756	0.774628
op_n_orb_u_l	177.06	176.748	160.289	195.845	7.72265	177.267	176.357	167.34	193.185	6.33787	169.177	168.414	152.661	198.346	6.96431	169.137	167.934	156.949	187.787	7.94326	-0.177118	0.85993	0.0289222	0.977033
op_n_orb_u_r	177.014	176.574	161.061	195.516	7.85219	177.602	175.881	168.357	196.424	6.79388	169.486	169.237	154.671	195.543	6.8295	169.506	168.864	157.965	188.111	7.58786	-0.476852	0.635034	-0.0156817	0.987545
op_n_po_l	110.764	111.362	95.4917	126.158	6.60931	110.429	111.85	97.6092	127.987	6.19508	107.22	107.292	92.4144	121.326	5.68218	107.01	106.661	91.1036	118.233	6.01594	0.304021	0.762129	0.200484	0.841817
op_n_po_r	110.648	111.205	94.0422	129.842	6.67425	111.258	110.773	101.528	128.81	6.14114	107.211	107.524	95.2083	119.01	5.30363	107.039	107.152	92.232	116.164	5.69907	-0.55408	0.581486	0.173279	0.863054
op_n_ra_l	117.923	118.172	104.828	134.29	6.09093	117.545	116.865	106.339	134.676	5.60227	115.382	115.172	97.1225	132.666	6.54182	115.019	113.715	97.2566	132.45	6.67332	0.376672	0.707683	0.31013	0.757568
op_n_ra_r	119.023	119.168	102.135	136.713	6.16499	120.005	118.504	110.523	140.125	5.71814	116.063	115.864	100.047	133.631	6.19834	115.795	115.442	101.617	134.115	6.3734	-0.960395	0.340551	0.239969	0.811201
op_n_zma_l	170.556	170.69	150.576	188.873	8.15616	170.824	170.568	160.363	189.233	6.11648	163.985	163.525	145.361	185.946	6.91685	163.022	163.091	146.407	178.502	7.53705	-0.232124	0.817066	0.736907	0.464267
op_n_zma_r	170.193	170.485	149.481	190.66	8.17886	171.023	170.21	162.427	190.359	6.28248	163.971	164.124	144.233	180.481	6.94524	162.997	163.292	145.187	176.623	7.00142	-0.704458	0.483352	0.791327	0.431935
op_n_zo_l	174.838	175.117	156.918	194.741	8.15204	175.121	174.337	165.447	194.901	6.35851	168.319	168.028	150.481	193.529	6.92531	167.903	166.357	151.839	184.206	8.3439	-0.23878	0.811944	0.29181	0.77158
op_n_zo_r	174.728	174.487	156.583	195.245	8.19644	175.482	174.001	165.976	196.381	6.81454	168.371	168.124	149.662	190.305	6.99392	167.977	167.868	149.421	182.72	7.93831	-0.603508	0.548156	0.288736	0.77388
op_n_zy_l	142.217	142.498	122.337	161.78	6.88187	141.75	141.851	131.735	157.728	5.6985	136.359	135.794	119.019	158.237	6.4992	135.297	135.353	120.01	153.151	8.00372	0.445564	0.657306	0.779894	0.43899
op_n_zy_r	141.799	141.917	123.435	161.764	7.17707	142.208	141.903	133.16	158.285	5.60699	136.612	136.8	119.335	157.192	6.31117	135.963	136.117	122.318	153.095	7.34595	-0.390784	0.697096	0.51499	0.608677
orb_d_l_d_r	49.778	49.7784	43.2596	58.9213	2.94402	50.4466	50.4611	43.0972	60.3768	3.68205	47.1644	47.3056	38.8836	55.6293	2.83489	47.6328	48.0733	42.405	56.3536	3.00761	-1.06955	0.289803	-0.894438	0.374865
orb_d_l_ec_r	84.2548	84.7562	73.356	90.8584	3.28058	85.5947	85.8043	78.2393	96.5376	3.45767	81.463	81.499	74.258	91.1983	3.23492	81.5975	81.6165	75.3478	89.4584	3.28454	-2.223	0.0301967	-0.233323	0.816325
orb_d_l_orb_d_r	61.9587	62.3782	54.7688	70.2122	2.85999	62.7667	63.2642	56.2864	72.0477	3.10244	59.9681	59.864	53.3101	68.0467	2.90963	60.0194	60.1163	54.3603	68.4757	3.06163	-1.50156	0.138833	-0.0959257	0.923916
orb_d_l_orb_u_l	34.0818	33.9779	28.9191	39.4586	2.2754	34.6335	34.5946	29.5652	39.1992	2.41395	33.666	33.7504	27.0875	39.7053	2.22896	33.6576	33.3941	29.1225	37.2037	1.78027	-1.31252	0.194627	0.0255078	0.979721
orb_d_l_orb_u_r	70.9575	70.9242	63.4087	78.8577	2.98627	71.8315	72.3824	64.7852	79.8918	3.1656	68.9552	68.8954	61.3732	77.121	3.03843	69.1648	69.1417	63.5476	78.1334	2.95688	-1.58532	0.118448	-0.400445	0.690243
orb_d_r_orb_u_r	33.9048	33.9666	27.7519	39.8598	2.1955	34.6144	34.6116	29.022	39.723	2.51698	33.5985	33.6917	25.7668	39.5153	2.28775	33.7623	33.5734	30.578	38.2533	1.86401	-1.63977	0.106857	-0.476536	0.635175
orb_u_l_d_r	45.259	45.3146	39.0293	54.2859	2.59295	46.1528	46.1733	40.7132	55.8766	2.897	43.7446	43.585	38.3306	51.4183	2.43334	43.7489	43.9715	38.5581	50.5395	2.70465	-1.78732	0.0794038	-0.00910798	0.992766
orb_u_l_ec_r	84.752	85.2924	73.7249	91.7592	3.3461	86.2157	86.297	80.1824	98.0347	3.48042	81.8392	81.8972	74.6311	92.3497	3.20718	81.9198	82.2561	75.5208	90.571	3.33783	-2.40658	0.0193359	-0.138223	0.890547
orb_u_l_orb_d_r	70.4274	70.6564	62.3614	77.8185	2.94657	71.5966	72.6565	63.7843	79.6932	3.22779	68.6346	68.6561	61.475	77.0129	3.07418	68.5998	68.8405	61.955	77.1512	3.07354	-2.09167	0.0410482	0.064185	0.949039
orb_u_l_orb_u_r	61.9603	62.3604	54.9971	70.4262	2.86518	62.7829	63.2687	56.3789	72.0397	3.04793	60.009	59.8492	53.3127	68.2513	2.93743	60.0829	60.2839	54.0955	68.1964	3.12827	-1.55071	0.126539	-0.135649	0.89258
po_l_d_l	98.2427	98.1848	88.7768	108.009	3.97893	98.2661	98.0511	91.6731	104.838	3.55734	93.577	93.7361	83.9537	105.201	3.73562	93.5955	93.6457	83.8477	101.733	4.10849	-0.0364658	0.971024	-0.0260042	0.979347
po_l_d_r	112.306	112.657	102.016	121.917	4.57444	112.715	112.727	102.78	125.628	4.61866	107.011	107.439	97.1603	117.348	3.67911	106.953	107.497	97.617	115.838	4.32917	-0.504287	0.615947	0.0778267	0.938257
po_l_ec_l	74.9012	75.0884	67.2111	83.1332	3.58063	74.3413	74.5118	67.4428	79.926	2.80562	71.0771	70.7772	63.2455	82.8103	3.2376	70.5882	70.8852	65.2106	76.0932	3.03981	1.07043	0.287965	0.901969	0.370564
po_l_ec_r	132.557	132.777	118.279	141.668	4.57526	133.369	133.387	125.565	147.729	4.76482	127.27	126.849	117.755	139.337	3.82237	127.204	127.362	117.324	133.674	3.77955	-0.975739	0.333283	0.099597	0.920999
po_l_ms_l	32.2347	32.4224	22.6906	45.2857	3.67914	33.2336	34.0362	21.5139	38.8972	3.49073	28.7223	28.3942	20.4405	36.7937	3.07154	29.422	29.6483	22.3314	35.313	2.9459	-1.60833	0.112886	-1.33795	0.185881
po_l_ms_r	120.231	120.636	105.422	132.806	4.78991	121.565	121.265	112.737	131.612	5.08276	113.867	113.142	103.143	127.977	4.53095	114.41	113.872	108.495	122.799	3.66254	-1.50807	0.137083	-0.801844	0.425334
po_l_orb_d_l	86.4323	86.108	74.1281	96.0262	4.20057	86.6772	86.9798	79.863	92.8471	2.90592	82.1914	82.1731	73.338	91.9084	3.51694	81.9697	82.1649	70.9393	91.5884	4.06062	-0.435158	0.664578	0.317865	0.751816
po_l_orb_d_r	121.798	122.054	108.401	130.99	4.55568	122.492	122.857	114.155	134.637	4.34223	116.797	116.648	107.278	127.929	3.72242	116.681	117.093	105.196	124.328	4.04227	-0.898934	0.372207	0.165142	0.869428
po_l_orb_u_l	98.0009	97.9531	85.7377	106.282	3.88807	97.9614	98.0825	90.0424	106.284	3.15941	93.2619	93.3552	85.8164	104.239	3.26941	92.5917	92.6199	85.9856	98.7756	3.44657	0.0677574	0.946171	1.11555	0.269294
po_l_orb_u_r	130.254	130.752	117.774	139.241	4.50551	130.876	131.237	122.172	144.356	4.43822	124.915	124.77	115.233	136.014	3.68647	124.666	125.047	115.327	131.677	3.98204	-0.793972	0.430352	0.359929	0.720252
po_l_po_r	120.091	120.203	102.612	138.857	6.08054	121.016	120.391	110.465	133.184	6.26893	115.641	115.103	104.504	131.097	5.36877	115.859	115.298	108.726	126.327	4.23031	-0.84239	0.403038	-0.276609	0.782869
po_r_d_l	113.754	113.811	102.373	124.134	4.22172	114.166	114.235	103.531	126.888	4.59816	108.538	108.33	98.792	123.188	3.87603	108.079	107.535	100.942	117.827	3.661	-0.51774	0.606686	0.703776	0.48422
po_r_d_r	99.2796	99.5938	89.082	107.417	3.993	99.1666	99.1635	88.7804	106.569	3.98435	95.1072	94.7819	85.5463	110.279	3.58394	94.3079	94.4093	86.1971	101.168	3.72822	0.160946	0.872684	1.22693	0.224848
po_r_ec_l	134.372	134.62	122.624	145.281	4.51069	134.994	134.564	126.199	147.523	4.5434	128.796	128.524	119.295	142.778	4.20928	128.379	127.852	121.707	134.161	2.85311	-0.778813	0.439212	0.749649	0.45554
po_r_ec_r	75.4147	75.0521	67.9038	83.376	3.47641	74.7337	75.5266	66.9452	81.8666	3.56745	72.0504	71.9193	64.7388	84.2976	3.24466	71.0135	70.693	64.6988	75.8296	2.86584	1.08976	0.280322	2.00167	0.0494857
po_r_ms_r	32.214	32.7556	22.0273	41.5745	3.72147	33.2634	34.1643	24.0595	38.5525	3.45226	28.5584	28.6503	21.2126	38.7422	3.21875	29.4889	29.3732	22.0857	34.4926	2.81651	-1.70037	0.094025	-1.82361	0.0727598
po_r_orb_d_l	123.533	123.889	111.41	134.019	4.45305	124.179	124.536	112.445	136.601	4.43721	118.516	118.318	108.056	130.191	4.04916	118.085	117.442	109.989	127.756	3.53508	-0.826307	0.411943	0.671365	0.504337
po_r_orb_d_r	88.0086	87.9978	77.245	97.1812	4.01558	87.9421	88.1666	77.6555	95.3225	3.76729	84.032	84.0881	76.1804	95.0855	3.4839	83.2635	83.3354	77.3881	90.6853	3.17759	0.0990601	0.92141	1.34786	0.182495
po_r_orb_u_l	131.719	132.106	120.849	141.445	4.40824	132.282	131.606	122.784	146.362	4.52797	126.361	126.245	115.225	140.285	4.08447	125.493	125.071	118.701	133.658	3.34826	-0.709569	0.480814	1.4085	0.163429
po_r_orb_u_r	99.1668	99.4163	88.951	108.699	3.84772	99.2357	99.439	90.7855	108.717	3.7111	94.8395	94.7222	86.4159	108.395	3.36582	93.7927	93.6431	88.7039	101.775	3.12084	-0.104821	0.916864	1.87611	0.0653024
ra_l_al_l	99.6821	99.7629	85.0329	111.055	4.8183	100.219	99.7932	92.3236	108.685	3.45621	92.416	92.4081	79.4913	104.374	4.67513	92.1294	91.8775	82.7045	101.777	4.93459	-0.811513	0.419488	0.333296	0.740135
ra_l_al_r	114.521	115.074	97.7582	124.552	4.71911	115.06	115.062	107.357	124.012	3.60521	107.285	107.547	94.5414	119.259	4.23163	107.141	106.919	99.1725	115.807	4.51805	-0.796017	0.428547	0.183396	0.855144
ra_l_alv	79.434	79.9321	65.9981	86.6501	3.52054	79.4451	79.1784	73.7745	87.1235	3.28666	74.2003	74.074	65.0492	83.5633	3.23478	73.87	73.7871	67.7531	80.9506	3.43676	-0.0188682	0.985007	0.552111	0.583042
ra_l_ast_l	57.0001	56.9765	47.1709	74.6375	4.43149	56.5481	56.1237	49.92	65.3229	3.46131	55.0102	54.8997	44.4513	71.5702	4.68987	54.6856	54.7151	42.4322	64.1893	4.99853	0.699907	0.48621	0.373275	0.710338
ra_l_ast_r	137.126	137.407	123.24	152.007	4.6995	137.847	137.987	130.087	150.387	4.97919	131.752	131.474	120.985	142.629	4.63723	131.62	130.838	125.189	139.327	3.90149	-0.831791	0.40901	0.18561	0.853303
ra_l_b	134.593	134.93	124.378	147.25	4.22179	134.387	134.257	124.845	143.54	4.74681	129.081	129.428	112.009	142.548	4.27892	128.573	128.381	120.178	138.868	4.39066	0.251228	0.802579	0.659973	0.511881
ra_l_ba	69.5221	69.502	59.2548	77.1958	3.0378	69.7583	68.9725	65.7044	76.5001	2.75647	65.5645	65.6684	57.3825	74.7915	2.64546	65.831	66.2965	60.5907	72.9589	2.98171	-0.476923	0.635049	-0.518502	0.606201
ra_l_d_l	95.5405	95.4506	81.3426	107.169	4.22872	95.5324	95.0014	88.4434	103.719	3.63409	88.8991	88.7852	78.2816	103.605	4.45692	89.0555	89.0197	79.4998	97.9131	5.03544	0.0122661	0.99025	-0.180321	0.857569
ra_l_d_r	111.225	111.063	96.4792	122.563	4.64869	111.604	111.17	102.836	126.105	4.73916	103.959	104.465	94.1069	117.255	4.55928	103.997	103.852	95.655	112.727	5.0396	-0.455981	0.650097	-0.0435891	0.965389
ra_l_ec_l	69.3672	69.4619	58.4121	81.2894	4.06085	68.8238	68.3522	61.2297	76.746	3.70611	63.669	63.8464	52.119	78.3573	4.27636	63.4204	63.08	56.2619	70.4907	4.30937	0.817318	0.416806	0.328158	0.743958
ra_l_ec_r	133.881	134.412	115.779	141.436	4.42128	134.65	134.951	126.446	149.822	4.83669	126.825	126.859	117.894	136.568	3.79931	126.722	126.145	119.041	135.114	4.03008	-0.917743	0.362714	0.146591	0.883974
ra_l_en_ba	69.4348	69.4596	59.1385	77.2839	3.04042	69.6767	68.9628	65.6552	76.1141	2.75366	65.5229	65.5535	57.3931	74.5809	2.63129	65.7954	66.3102	60.6409	72.9868	2.96329	-0.488831	0.626637	-0.53333	0.595967
ra_l_foram_l	62.4251	62.5798	50.1543	71.0065	3.16218	63.0089	62.8837	57.0481	68.8566	3.15681	59.5161	59.4061	51.526	69.7841	3.11914	60.1001	59.7552	53.2825	69.4957	3.27031	-1.05025	0.297872	-1.02347	0.310393
ra_l_foram_r	90.0938	90.1312	78.4614	98.5644	3.44846	90.5422	90.2882	83.938	96.0421	2.93973	86.0212	86.2317	76.8967	94.0432	3.33208	86.3414	86.2678	80.2344	94.2842	3.49803	-0.83664	0.405759	-0.524708	0.601815
ra_l_ft_l	75.8287	75.8157	60.7027	87.1895	5.22688	75.5496	75.3704	66.0616	84.4885	4.13399	70.0685	69.6219	59.7844	81.3332	4.48121	70.4163	69.7955	62.643	83.8246	4.47224	0.363048	0.717631	-0.441582	0.6604
ra_l_ft_r	137.426	137.829	118.467	147.266	4.80851	137.867	138.03	128.64	150.709	5.13742	130.359	130.24	121.931	141.721	3.82237	130.543	130.226	122.144	138.637	4.26871	-0.493399	0.623643	-0.249888	0.803606
ra_l_ftm_l	72.3038	72.2467	60.769	86.4949	4.10622	71.7229	71.335	64.1982	82.8013	4.39895	67.1752	67.0163	56.7907	82.0082	4.48229	66.6668	67.4431	59.6589	73.8474	4.13184	0.759623	0.450643	0.687463	0.494318
ra_l_ftm_r	138.738	139.277	119.509	146.316	4.43138	139.174	139.477	131.184	154.582	5.0283	131.389	131.481	121.891	140.674	3.88612	131.302	130.361	122.69	139.47	4.08679	-0.503353	0.616748	0.122504	0.90293
ra_l_l	124.384	124.065	110.589	139.447	5.50366	124.229	124.761	114.597	138.398	5.35645	121.458	121.735	106.496	138.225	5.83762	121.789	121.389	108.116	136.558	6.03907	0.164068	0.870226	-0.313168	0.755282
ra_l_ms_l	38.103	38.4625	28.7383	53.7611	3.88721	38.8531	39.4675	27.953	44.7136	3.58504	35.2271	35.1108	26.7386	44.6852	3.41532	35.412	34.9502	29.072	41.4622	3.03653	-1.16889	0.24686	-0.337396	0.736909
ra_l_ms_r	126.984	127.269	111.546	137.516	4.31779	128.194	127.066	120.337	137.173	4.41971	119.651	119.437	109.448	129.897	4.15763	119.944	119.392	114.679	127.42	3.40823	-1.56208	0.123694	-0.465374	0.643115
ra_l_ns_l	106.382	106.708	91.7764	120.397	5.01188	106.987	107.003	99.1668	114.411	3.8993	98.9415	99.2759	86.9718	111.435	5.47994	98.6407	98.5786	89.1008	108.381	5.48112	-0.830449	0.408983	0.311715	0.756354
ra_l_ns_r	112.725	112.837	97.0746	124.551	4.89461	113.112	113.104	106.237	122.801	3.63848	105.37	105.625	92.4208	117.077	4.59725	105.157	105.214	97.6413	113.874	4.73706	-0.561361	0.576187	0.256766	0.79827
ra_l_o	83.1724	83.279	72.5493	91.3014	3.88801	83.5231	83.8259	77.1041	89.754	3.35081	80.0944	79.9714	71.0434	88.6206	3.51909	80.367	80.1177	73.5331	90.1066	3.62974	-0.575614	0.566817	-0.429065	0.66947
ra_l_orb_d_l	82.8577	83.5174	64.0225	95.4886	4.79388	83.082	82.9168	76.0862	90.6752	3.29468	76.4253	76.1889	64.2345	89.6969	4.70389	76.3811	76.1849	67.1056	86.3274	5.10982	-0.350613	0.726761	0.0498404	0.960427
ra_l_orb_d_r	122.183	122.832	103.119	130.562	4.6168	122.795	123.867	114.667	135.998	4.43795	115.178	115.935	105.486	125.156	3.8767	115.056	114.249	107.491	123.443	4.40574	-0.776736	0.440322	0.161436	0.872349
ra_l_orb_u_l	93.6086	93.6043	79.2028	105.911	4.40202	93.5828	93.2174	87.4795	103.938	3.79692	87.0428	86.9122	77.8374	100.974	4.09739	86.5856	86.9039	79.0325	93.9812	4.33541	0.0372625	0.970387	0.605374	0.547339
ra_l_orb_u_r	129.713	130.536	112.383	139.395	4.57173	130.286	131.155	122.421	145.078	4.62881	122.551	122.859	114.481	133.42	3.81623	122.349	121.514	115.081	130.247	4.32869	-0.705177	0.483493	0.271178	0.78728
ra_l_po_l	9.24558	9.26698	4.27223	19.4524	2.76115	8.97421	8.83777	4.30829	14.0164	2.71225	10.1165	9.77593	4.58488	17.8146	2.75475	9.71263	9.35787	5.37321	16.7271	2.84692	0.566404	0.573236	0.810829	0.420792
ra_l_po_r	125.965	125.842	109.319	141.258	5.24361	126.699	125.722	117.707	137.985	5.27782	120.537	120.477	109.526	131.913	4.74731	120.468	120.253	113.629	129	3.84749	-0.790461	0.432433	0.0973537	0.922722
ra_l_ra_r	130.814	130.875	114.209	144.335	5.10776	131.434	129.961	123.129	142.853	5.27519	123.938	124.094	112.872	135.249	4.50936	123.936	123.606	117.376	132.303	4.03118	-0.67257	0.503901	0.00269667	0.997857
ra_l_zma_l	68.4506	68.5809	57.6108	80.6868	4.69683	68.9045	68.9742	59.9495	78.9715	4.04671	62.9434	63.0196	47.9711	76.5241	4.93242	62.8352	62.6703	56.1645	70.9629	3.83467	-0.616769	0.53949	0.151059	0.880344
ra_l_zma_r	129.778	129.885	111.687	141.023	4.91126	130.71	130.052	120.787	144.891	5.09497	122.689	122.66	110.974	134.565	4.11478	122.464	121.74	115.96	134.186	4.33731	-1.04618	0.299848	0.297942	0.766831
ra_l_zo_l	84.7544	85.0461	73.1367	96.1548	4.79286	84.3712	84.5405	76.093	91.5433	3.71318	78.2189	78.5219	65.7973	89.4816	4.8091	78.0995	77.7078	69.7106	87.1453	4.90069	0.551788	0.582766	0.138933	0.889982
ra_l_zo_r	119.728	120.317	101.429	128.626	4.66321	120.585	121.1	111.932	131.388	4.36289	113.283	113.501	103.082	124.527	4.12008	113.902	113.793	101.915	124.591	4.95731	-1.1018	0.274794	-0.73174	0.467573
ra_r_al_l	114.225	114.294	101.333	127.569	4.88879	114.363	113.969	104.172	123.508	4.30429	107.27	106.853	97.1348	121.404	4.3208	106.492	106.88	97.6819	119.024	4.1902	-0.177539	0.859634	1.04854	0.298563
ra_r_al_r	99.2125	99.2327	86.013	111.589	5.18137	99.175	99.0383	88.8358	107.716	4.04011	92.6628	92.6398	79.4636	107.582	4.68801	91.7877	91.881	82.7766	103.013	4.39412	0.0497253	0.960477	1.11647	0.268523
ra_r_alv	79.3171	79.706	67.7447	88.7891	3.74666	79.4767	78.9266	74.0795	86.8158	3.3018	74.4026	74.2745	64.963	83.6483	3.32658	74.2726	74.0193	66.9187	82.3734	2.80391	-0.267271	0.790103	0.253685	0.800505
ra_r_ast_l	137.022	136.977	122.564	148.815	4.474	137.182	136.653	127.748	147.491	4.75124	131.067	130.878	118.691	142.404	4.33543	131.718	131.082	123.316	140.313	4.50144	-0.1928	0.847804	-0.827941	0.411122
ra_r_ast_r	57.7747	57.5039	45.7961	74.8113	4.61467	57.9151	57.4055	52.2093	68.0118	3.4514	55.5692	55.5066	38.884	71.8206	5.12901	55.4607	55.4171	46.9414	68.165	4.8178	-0.215421	0.830014	0.126402	0.899823
ra_r_b	134.793	134.583	126.164	146.078	3.99677	135.445	135.025	123.7	146.107	5.28275	129.485	129.322	118.633	143.293	4.17138	128.961	129.102	120.35	138.762	4.11478	-0.731096	0.468119	0.722454	0.472835
ra_r_ba	69.9925	70.2112	62.7565	76.8598	2.99592	70.7556	70.5325	65.9752	77.7443	2.94127	66.046	65.8701	59.4105	74.8374	2.78205	66.4884	66.7013	62.6462	72.2098	2.45465	-1.46861	0.14717	-0.99664	0.322621
ra_r_d_l	111.04	111.023	98.0071	124.055	4.76164	111.248	111.012	101.687	124.488	4.73254	104.199	104.3	93.3421	122.738	4.59845	104.068	104.283	95.4178	118.738	4.84384	-0.248962	0.80425	0.154454	0.877797
ra_r_d_r	94.8469	94.9419	83.1282	106.092	4.44832	94.5036	93.8769	87.2352	103.872	3.89538	89.1137	88.9626	79.4988	108.591	4.40131	88.6789	88.4159	79.1349	100.551	4.88386	0.486592	0.628168	0.515237	0.608446
ra_r_ec_l	134.31	134.672	118.931	146.163	4.62269	134.774	134.299	128.111	147.323	4.71279	127.138	126.835	116.025	144.333	4.13477	126.98	126.728	119.406	136.974	3.43766	-0.562026	0.576252	0.250369	0.803048
ra_r_ec_r	68.1234	68.2456	57.4217	80.6391	4.34861	67.1833	67.1295	60.9781	75.1457	3.76798	63.4008	63.6692	54.0125	80.4056	4.22128	62.7637	62.6728	54.7933	72.2764	3.98923	1.374	0.174071	0.896988	0.373213
ra_r_en_ba	69.9298	70.0953	62.6486	76.9292	3.00397	70.7147	70.3364	65.8283	77.7374	2.93192	66.0277	66	59.2792	74.7165	2.78488	66.4726	66.683	62.5524	72.2918	2.43287	-1.51343	0.135406	-1.00897	0.316684
ra_r_foram_l	90.4191	90.2149	81.9407	101.515	3.36242	91.1263	91.0169	85.6534	95.5523	2.63803	86.0242	86.0726	77.357	96.7562	3.35865	86.6918	86.3505	80.5292	96.7994	3.87463	-1.43853	0.154577	-1.00311	0.320291
ra_r_foram_r	62.6588	62.6267	53.6543	69.2958	2.982	63.4259	63.7389	57.7976	67.9226	2.82233	59.3736	59.202	50.394	68.4296	3.11291	60.0979	59.6742	53.3552	68.8476	3.5258	-1.52698	0.131884	-1.19265	0.238176
ra_r_ft_l	137.352	137.507	120.101	148.588	4.98561	137.936	138.677	127.869	151.032	5.06304	130.613	130.213	121.128	147.148	4.17773	130.547	130.083	124.156	143.278	3.70682	-0.657374	0.51352	0.0980514	0.922194
ra_r_ft_r	74.5037	74.2531	57.697	88.199	4.8662	74.0894	74.6676	64.0968	81.1486	4.06536	69.4959	69.1693	57.4194	85.6049	4.48214	69.4365	69.1262	62.7663	83.7222	4.34577	0.556116	0.579945	0.0772152	0.938707
ra_r_ftm_l	138.767	139.088	121.811	150.337	4.70436	139.181	138.414	131.599	153.002	4.91921	131.518	131.025	120.946	148.598	4.14757	131.092	131.055	124.226	141.238	3.46817	-0.482	0.631641	0.670031	0.505093
ra_r_ftm_r	71.1327	71.0754	61.6714	84.0857	4.3207	70.0376	70.2284	62.1242	80.7827	4.25998	66.7653	67.0145	55.6803	80.9116	4.34588	66.2558	66.2579	58.4019	76.7148	4.13292	1.45631	0.150543	0.693321	0.490724
ra_r_l	125.291	125.39	108.067	141.82	5.57238	126.502	126.265	116.026	143.232	5.60839	122.226	123.123	108.273	142.083	5.89476	122.84	121.697	114.752	137.837	5.34461	-1.22755	0.224505	-0.639298	0.524919
ra_r_ms_l	127.043	127.185	110.738	136.738	4.28086	127.771	127.302	120.827	136.621	4.38543	119.332	119.024	108.393	130.344	4.03014	119.81	120.133	113.203	127.995	3.60606	-0.947353	0.347381	-0.735019	0.464994
ra_r_ms_r	38.7262	39.062	28.8595	47.1484	3.67677	39.6361	39.9459	30.0464	45.2638	3.59134	35.2784	35.0982	26.084	47.4395	3.45216	35.7572	35.9015	27.2806	42.932	3.19848	-1.43267	0.157129	-0.837006	0.405771
ra_r_ns_l	112.424	112.678	98.3087	125.471	4.87232	112.302	112.118	99.9977	120.367	4.17707	105.482	105.35	93.6561	117.315	4.5434	104.645	105.116	94.8208	114.271	4.17517	0.160442	0.873016	1.11891	0.267422
ra_r_ns_r	106.338	106.422	92.3693	119.704	5.41138	106.285	106.214	93.8961	116.563	4.61467	99.2508	98.9187	84.9667	111.841	5.45338	98.8269	99.1275	87.9486	110.317	5.34914	0.0631076	0.949868	0.448519	0.655396
ra_r_o	84.0152	84.2519	75.0357	94.0094	3.71879	85.1173	84.953	78.1283	91.8936	3.46183	80.6533	80.452	69.3819	91.3085	3.65082	81.0984	80.9064	75.9186	89.9287	3.45344	-1.78223	0.0795757	-0.72403	0.471787
ra_r_orb_d_l	122.394	122.869	104.981	134.731	4.86357	122.749	122.464	114.742	135.331	4.59543	115.614	115.396	105.623	131.145	4.14047	115.443	115.013	106.954	128.16	4.21453	-0.434488	0.66545	0.230475	0.818529
ra_r_orb_d_r	82.6086	83.1992	63.2201	94.7369	5.10198	82.1945	82.083	74.7642	90.6103	3.68049	76.893	77.1832	63.5867	92.8856	4.5386	76.4802	76.7214	69.1282	86.2128	4.2895	0.588851	0.557637	0.540511	0.590791
ra_r_orb_u_l	129.664	130.073	113.249	142.439	4.81467	130.064	128.985	121.138	144.432	4.74809	122.788	122.744	113.585	140.383	4.13771	122.259	122.333	114.361	135.108	4.10149	-0.477548	0.634715	0.731919	0.467091
ra_r_orb_u_r	93.0673	93.319	75.5078	105.389	4.73274	92.947	92.524	84.1064	103.024	3.78267	87.3929	87.4995	77.6849	105.44	4.14948	86.7562	86.8773	80.0544	98.7987	4.17867	0.171479	0.864333	0.866761	0.389595
ra_r_po_l	125.447	125.375	110.961	140.073	5.37858	126.239	125.465	118.335	138.169	5.48345	119.791	119.481	108.89	131.006	4.51676	120.025	119.696	112.177	127.833	4.00517	-0.824163	0.413205	-0.323018	0.747719
ra_r_po_r	10.2601	10.2212	4.66833	18.7392	3.1402	10.1915	10.6125	3.93534	15.9769	2.89929	10.8197	10.6692	3.47936	20.34	3.04145	10.2772	9.4483	6.07631	19.4743	3.03462	0.132276	0.895189	1.01517	0.314154
ra_r_zma_l	130.147	130.507	114.116	143.475	5.10163	130.842	130.076	123.695	140.422	4.30916	122.807	122.698	109.26	135.537	4.58632	122.256	122.691	113.452	132.575	3.80648	-0.882041	0.380872	0.788266	0.433246
ra_r_zma_r	67.4684	67.751	54.9173	78.7334	4.82521	67.593	67.6113	57.674	74.7443	3.77472	62.5396	62.4118	45.982	75.2706	5.08933	61.9768	61.7283	56.4033	70.7781	3.77405	-0.177002	0.859998	0.787229	0.433566
ra_r_zo_l	120.661	121.155	103.35	133.537	4.90856	121.654	120.852	113.284	134.799	5.04972	114.557	114.486	102.773	132.591	4.50829	114.209	113.952	103.999	128.691	4.48899	-1.12363	0.265803	0.439757	0.661711
ra_r_zo_r	85.1028	85.2783	73.9127	99.3857	5.27502	84.9767	84.9126	76.3678	95.1771	4.42732	79.2573	79.45	58.3476	93.8473	5.26458	78.1464	78.3195	68.8976	88.3989	4.66186	0.155563	0.876837	1.31914	0.191749
zma_l_b	152.903	152.805	138.753	168.102	5.60453	153.477	154.039	142.636	166.954	5.72186	145.351	145.005	131.133	168.397	5.29444	145.015	145.305	135.766	156.233	4.95957	-0.572382	0.569265	0.378983	0.705993
zma_l_d_l	57.5416	57.7349	47.7002	66.5657	3.49895	57.9841	57.1611	51.932	66.1561	3.95166	52.8863	53.1348	45.7016	61.5553	3.52103	53.6361	53.4321	46.9791	60.7206	3.61907	-0.649809	0.518541	-1.18312	0.24159
zma_l_d_r	75.3691	75.7457	64.3648	90.5709	4.60496	76.1758	76.0917	66.5064	83.6226	4.63715	69.8917	70.0756	59.29	82.8298	4.02006	70.3484	70.1834	62.7252	80.5318	4.42458	-0.989617	0.326414	-0.596512	0.553261
zma_l_ec_l	38.441	38.4947	29.7793	46.716	2.7556	38.3813	39.2833	31.6238	43.1092	3.22291	35.2547	35.3528	26.6847	42.3565	2.76383	35.6857	35.6947	30.3135	40.5469	2.34867	0.108112	0.914311	-1.00563	0.318192
zma_l_ec_r	104.663	104.978	90.5045	120.131	4.50329	106.078	105.881	99.2103	115.393	3.75665	99.8451	99.7563	87.9465	113.072	3.98558	99.7174	99.4877	90.701	108.493	4.08178	-2.05517	0.0436743	0.178525	0.858931
zma_l_ft_l	60.1961	60.1949	47.4482	69.5229	4.30221	61.0664	61.3894	49.8397	68.6652	4.58701	55.0273	54.5776	45.6328	67.6437	4.07289	56.3312	55.0803	48.74	71.0208	4.51163	-1.09057	0.280083	-1.67197	0.100189
zma_l_ft_r	114.548	114.337	99.0107	130.948	4.88765	115.686	115.535	108.557	126.527	4.27173	108.484	108.206	96.8279	121.2	4.19043	108.887	108.051	99.411	123.463	4.73857	-1.46946	0.146476	-0.493496	0.623644
zma_l_ftm_l	47.2814	47.4413	36.6265	55.6741	2.97875	47.1109	47.2229	36.9837	54.6929	4.20644	44.1787	44.1152	36.4546	51.6987	2.74519	44.2225	44.0795	40.3981	49.3314	2.13249	0.242177	0.809659	-0.110037	0.91268
zma_l_ftm_r	111.245	111.368	95.7445	126.598	4.72781	112.309	112.503	106.073	121.102	4.13412	105.836	105.685	94.2434	119.803	4.08603	105.769	105.97	97.5969	115.831	4.13055	-1.4207	0.16013	0.0921512	0.926892
zma_l_l	176.601	176.614	159.403	194.316	7.44476	177.163	177.221	164.837	192.902	6.17295	169.397	169.124	152.11	192.747	6.57395	169.606	169.407	154.369	182.73	7.11276	-0.495186	0.622043	-0.169442	0.866059
zma_l_ms_l	80.8169	80.6294	67.1566	93.2063	4.66991	81.2064	80.6906	71.1204	92.5861	4.09612	77.1018	77.5347	66.6491	88.3337	4.20251	75.7617	76.3626	66.3948	82.4747	3.93276	-0.525174	0.601234	1.90974	0.060784
zma_l_ms_r	131.179	131.339	114.542	143.929	4.59951	132.679	132.688	121.832	143.634	4.58425	124.353	124.342	112.835	139.627	4.35052	123.648	123.45	117.061	132.296	3.71203	-1.85832	0.0680926	1.04196	0.301164
zma_l_orb_d_l	29.2755	29.094	21.6522	37.4276	3.51285	29.4252	29.6653	24.0015	35.7196	2.77246	25.944	26.0913	18.3929	33.657	2.93801	26.1243	26.2391	19.8863	32.8973	3.03236	-0.290225	0.772475	-0.339785	0.73525
zma_l_orb_d_r	81.6148	81.7292	70.946	95.5224	4.09739	82.4688	82.1942	76.0819	89.7867	3.26506	77.5695	77.6246	67.9269	89.1665	3.63748	77.3924	77.6294	68.9674	85.8349	3.94006	-1.40961	0.162986	0.259035	0.796558
zma_l_orb_u_l	59.5389	59.5781	50.631	70.5163	3.34533	60.0936	60.578	50.4072	66.6201	3.94999	55.6396	55.91	47.2063	63.0969	3.05673	55.9117	55.5895	51.4569	62.3816	2.828	-0.820375	0.415664	-0.53795	0.592515
zma_l_orb_u_r	96.7821	96.6368	84.1512	110.206	4.19823	97.8344	98.6575	89.3418	105.217	3.98956	91.9735	92.0648	80.8533	104.094	3.87322	92.1257	92.0853	85.3061	102.215	3.97628	-1.48303	0.143179	-0.218499	0.827807
zma_l_po_l	72.101	72.0659	62.1444	83.9349	3.94475	72.5902	72.8674	66.2326	81.6139	3.43553	68.8712	68.7564	58.6132	79.1158	3.63069	68.5276	68.4013	60.3738	74.1167	3.21324	-0.785178	0.43516	0.591915	0.555958
zma_l_po_r	129.405	129.461	115.726	144.076	4.93768	130.419	130.331	119.596	138.61	4.19042	123.949	123.72	113.41	135.179	4.60098	123.208	122.923	113.76	129.175	3.33191	-1.32564	0.189428	1.16491	0.247564
zma_l_zma_r	93.8005	93.8548	74.8681	112.33	5.46429	94.7004	93.9302	86.6184	108.17	4.88609	89.7352	89.6181	74.9507	103.527	4.70355	89.3955	88.3965	80.4253	101.23	4.6258	-1.02176	0.310712	0.415808	0.679038
zma_l_zo_l	31.3721	31.6627	20.6298	41.1728	3.64702	30.6543	30.4659	23.402	42.0896	3.94909	27.3234	27.1549	17.9327	42.1351	3.62398	27.3926	27.7622	20.6836	33.6097	3.30746	1.04762	0.299315	-0.116647	0.907508
zma_l_zo_r	78.2685	78.3382	65.9679	92.2931	4.60162	79.1875	78.7462	71.1404	87.9035	3.71624	74.6679	74.5445	63.608	89.004	4.26901	75.4186	75.5338	61.7729	85.3606	4.95252	-1.33761	0.185313	-0.883264	0.38103
zma_r_b	152.878	153.144	139.024	166.546	5.42399	153.796	154.73	143.332	169.368	5.68618	145.562	145.513	131.254	165.632	5.36729	145.404	144.985	135.676	154.675	4.69813	-0.925735	0.358472	0.184611	0.854103
zma_r_d_l	75.2426	75.6561	63.2512	87.6874	4.41771	76.0048	76.8734	65.6178	89.3904	5.08321	70.3914	70.4894	60.2915	81.937	3.75599	71.1577	70.2297	64.797	79.7469	3.95006	-0.872579	0.386758	-1.11235	0.270651
zma_r_d_r	57.6131	57.434	48.8457	67.502	3.69647	57.7511	57.5529	50.1746	65.0409	4.26474	53.2373	53.2319	44.4878	62.762	3.39644	53.9924	53.8838	47.6414	63.6875	3.79981	-0.188354	0.851307	-1.15152	0.25451
zma_r_ec_l	104.814	105.105	92.2746	116.096	4.53783	105.816	105.104	96.9467	118.247	5.13862	100.076	99.9398	88.2952	113.107	3.98576	100.366	100.135	94.0669	110.87	4.02921	-1.13202	0.262582	-0.409793	0.68345
zma_r_ec_r	38.2779	38.2301	30.4159	46.3153	2.9903	38.5828	38.4881	31.6175	43.2322	3.01087	35.3702	35.361	26.778	42.9436	2.87372	35.7696	36.19	30.423	41.3181	2.61671	-0.575939	0.566853	-0.850159	0.398429
zma_r_ft_l	114.266	114.429	99.0849	126.674	5.03158	115.605	115.227	107.787	129.66	5.4381	108.781	108.487	97.7203	123.52	4.04046	109.503	108.042	102.734	124.277	4.51675	-1.41882	0.161486	-0.925788	0.358608
zma_r_ft_r	59.9714	59.6392	47.0605	70.114	4.24992	60.6317	60.3481	50.6905	69.2104	4.14437	54.5451	54.628	45.5328	67.3311	4.41674	55.843	55.0375	49.1634	72.0522	4.67997	-0.9006	0.371388	-1.59231	0.116866
zma_r_ftm_l	111.007	111.06	97.8803	122.759	4.76385	111.915	110.934	103.837	126.054	5.2219	105.894	105.896	95.2055	119.797	4.01183	105.935	105.458	99.5801	116.776	4.07098	-1.00331	0.320057	-0.0570613	0.954691
zma_r_ftm_r	47.3543	47.3738	37.0998	55.7421	3.07772	47.3059	48.071	39.6183	54.3331	3.85154	44.1489	44.1906	36.5325	52.8915	2.91476	44.7206	44.827	40.1421	50.2905	2.47544	0.0740484	0.941258	-1.2656	0.210012
zma_r_l	176.234	175.988	155.536	195.918	7.38185	177.351	177.047	166.472	193.453	6.35285	169.464	169.556	151.669	187.301	6.74491	169.771	169.686	156.769	180.053	6.15768	-0.96618	0.337446	-0.277724	0.782128
zma_r_ms_l	129.973	129.53	110.578	141.503	4.83518	130.858	130.209	123.134	144.179	4.60214	123.69	124.104	110.572	133.406	3.98366	123.007	122.51	114.727	133.694	4.22178	-1.08171	0.283616	0.928638	0.357007
zma_r_ms_r	80.8995	81.2102	69.2661	90.9177	4.55334	82.2138	82.0556	68.0297	90.9582	4.86717	77.0032	77.5718	67.4635	87.5073	4.32851	75.965	75.4752	67.5325	85.2012	3.43742	-1.55284	0.126046	1.62618	0.108292
zma_r_orb_d_l	81.977	82.5349	70.2645	94.0636	4.16193	82.6468	82.1756	74.5869	95.5539	4.78229	78.3215	78.3028	68.1316	89.1208	3.54327	78.5568	78.1094	72.1346	87.7001	4.05556	-0.814963	0.418672	-0.337382	0.737133
zma_r_orb_d_r	30.0153	29.9068	20.6426	37.5285	3.53772	29.7331	29.5786	23.4645	36.2538	3.22277	26.7689	26.7859	19.4509	32.2622	2.94777	27.3366	26.5994	22.4662	34.2137	2.89425	0.48791	0.627293	-1.11016	0.271368
zma_r_orb_u_l	96.8571	97.4636	85.5823	108.04	4.31086	97.868	98.2075	89.8248	110.583	4.86172	92.4474	92.372	81.0678	103.99	3.78673	92.7443	92.3565	86.676	101.474	4.01342	-1.20637	0.232874	-0.424713	0.672651
zma_r_orb_u_r	59.8639	59.9776	50.9097	68.8969	3.54643	60.3806	61.1068	51.4608	66.6043	3.94362	56.0583	56.1113	48.7563	65.284	3.16488	56.7765	56.1921	53.0542	63.3724	2.7865	-0.758467	0.451404	-1.42481	0.158971
zma_r_po_l	127.632	127.468	113.003	137.932	4.91633	128.741	128.907	120.061	142.289	4.85795	122.542	122.54	110.641	134.211	4.02821	122.384	122.338	112.188	131.576	4.00868	-1.29365	0.200774	0.224033	0.823502
zma_r_po_r	72.8871	72.4819	62.5512	82.5653	3.6192	73.4477	73.6261	61.7503	80.9551	3.91224	69.8531	70.0504	60.1513	79.0476	3.79323	68.9302	69.0623	62.7828	74.4758	2.79335	-0.825599	0.41253	1.74016	0.0858001
zma_r_zo_l	79.497	79.4866	66.6037	91.6982	4.63669	80.9651	80.2022	73.0709	94.6207	5.15181	76.3902	76.3972	64.6462	86.5176	4.00068	76.4818	75.8775	68.0734	87.6637	4.58544	-1.64932	0.104772	-0.1162	0.907924
zma_r_zo_r	33.0599	33.0455	21.1992	44.4316	4.08095	32.8114	32.3814	23.9183	40.9324	4.16608	29.2137	28.9308	20.4596	44.4634	4.11995	28.7196	28.6043	21.0228	35.9564	3.77619	0.340185	0.73494	0.730005	0.468084
zo_l_b	134.801	134.547	121.114	151.741	5.05261	135.606	134.522	128.055	147.903	4.74391	130.541	130.311	118.737	154.677	4.92809	129.972	129.838	121.38	141.072	4.73517	-0.952021	0.344783	0.677677	0.500543
zo_l_d_l	28.0225	28.1306	20.2673	37.2091	2.64476	29.2725	28.9927	22.0422	35.2679	3.13379	27.6102	27.4208	19.4518	38.898	3.09184	28.2251	27.4461	23.3436	34.4455	2.68026	-2.33171	0.0235432	-1.26345	0.210856
zo_l_d_r	47.1728	46.9413	38.9216	58.1619	3.52047	48.8811	48.4359	40.6554	59.6471	3.9653	45.5466	45.568	36.9842	56.0196	3.71842	45.9642	45.3025	39.3301	56.9519	3.60911	-2.49894	0.0154919	-0.653365	0.515999
zo_l_ec_l	30.2127	30.3068	25.3138	34.7819	1.93887	30.081	29.5569	27.179	34.427	1.83093	29.199	29.1171	23.4128	37.4007	2.21209	29.373	29.2742	25.3603	32.2359	1.46011	0.404048	0.687574	-0.605447	0.54645
zo_l_ec_r	81.5727	81.7562	68.4128	91.1848	3.90965	83.8978	83.9491	75.9767	95.6964	4.74161	79.6813	79.3514	70.6964	90.2899	4.11391	79.7063	80.0128	70.4247	89.8766	3.98524	-2.87597	0.0058112	-0.0354091	0.97187
zo_l_ft_l	46.9241	46.7118	39.3387	54.2909	3.06198	47.7202	47.558	42.5085	54.9176	2.74352	44.7571	44.5907	36.7645	53.4499	2.82908	45.6661	45.4069	40.1735	56.0289	3.30013	-1.61049	0.112182	-1.60637	0.114074
zo_l_ft_r	89.2869	89.2117	74.3985	100.18	4.28025	91.2387	90.9555	83.5033	100.367	5.00122	86.6983	85.9078	79.0435	100.953	4.09579	87.1093	87.2033	77.9613	101.166	4.32233	-2.27658	0.0268377	-0.545516	0.587529
zo_l_ftm_l	37.4891	37.5778	32.6209	42.5711	2.04847	37.236	36.8087	33.3779	44.724	2.44627	36.3923	36.3886	30.3339	43.2879	2.16708	36.2043	36.0222	33.5756	39.9334	1.54101	0.60554	0.547412	0.635845	0.526682
zo_l_ftm_r	86.9242	86.6918	71.127	98.9499	4.15354	88.9418	88.8333	81.8493	100.927	4.68656	84.6271	84.2279	76.1161	96.0891	4.09691	84.6493	84.9234	76.1896	96.818	4.05751	-2.49792	0.015535	-0.0310229	0.975355
zo_l_l	176.75	176.781	160.008	194.825	7.51101	177.14	175.963	165.375	194.66	6.27989	170.328	170.129	151.871	196.639	6.70403	170.543	169.876	155.755	186.938	7.82937	-0.33898	0.735663	-0.16039	0.873178
zo_l_ms_l	102.517	102.4	88.0413	119.288	5.49928	102.382	101.799	94.0176	112.016	4.05096	96.056	95.9063	83.2557	111.951	4.51752	95.214	95.3653	81.9614	105.08	5.34623	0.174942	0.861581	0.920442	0.361504
zo_l_ms_r	130.527	130.982	112.314	140.226	4.75973	132.309	132.908	120.273	145.452	5.25613	123.517	123.564	112.298	143.262	4.39378	123.213	122.03	115.198	134.706	4.61504	-1.961	0.0549205	0.377283	0.707361
zo_l_orb_d_l	3.65757	3.09181	0.605054	14.5808	2.17399	3.39166	2.52762	0.542887	8.62759	2.14186	3.38869	2.88461	0.632248	12.4807	1.9977	3.00284	2.67174	0.952507	7.50947	1.5542	0.70322	0.484649	1.32906	0.18795
zo_l_orb_d_r	59.1625	59.1883	48.627	69.7168	3.5232	60.9249	60.7024	53.7093	71.0917	4.42718	57.9032	57.7891	49.7192	68.7157	3.85282	57.8402	58.1215	49.5473	68.6407	3.67317	-2.34606	0.0228629	0.0964941	0.923443
zo_l_orb_u_l	33.9661	33.9774	28.0917	40.6522	2.37729	34.872	35.2158	29.8598	40.0048	2.46397	34.2068	34.1122	28.7539	39.756	2.34994	34.2321	33.8675	30.0392	38.3732	1.97706	-2.10256	0.0398816	-0.0698072	0.944552
zo_l_orb_u_r	68.346	68.3805	56.1727	81.2217	3.67513	70.2364	69.9963	62.6113	79.4092	4.4858	67.3359	67.267	58.8252	78.8688	3.89351	67.4942	67.3549	61.1199	78.7236	3.57587	-2.47389	0.0166517	-0.247208	0.80555
zo_l_po_l	88.1406	88.1396	78.9027	97.2453	4.34796	87.8745	88.0093	80.0613	93.7111	3.17228	83.8348	83.8999	74.0448	95.4832	3.68363	83.5268	83.5101	74.0604	92.0033	4.00951	0.440701	0.660645	0.443206	0.65933
zo_l_po_r	121.995	121.658	108.743	132.168	4.51633	123.187	123.197	111.623	136.122	4.77253	117.633	117.579	107.217	131.569	4.28342	117.021	116.263	106.132	126.484	3.63529	-1.43401	0.157042	0.92149	0.360077
zo_l_zo_r	55.2757	55.7348	41.4257	67.6498	4.9329	57.0849	55.893	47.3629	70.5489	5.72967	54.6543	54.6568	37.9824	70.3694	5.46132	55.7075	56.2475	41.0599	68.1564	5.3383	-1.84034	0.0712496	-1.11573	0.268978
zo_r_b	134.049	134.259	118.246	149.198	4.84926	135.053	135.357	127.958	147.735	4.7191	129.942	129.579	119.122	150.296	4.83986	129.796	129.589	120.904	140.589	4.53045	-1.20198	0.234071	0.180976	0.856976
zo_r_d_l	45.2504	45.5626	35.9091	55.084	3.52937	46.3183	46.1077	40.2611	52.9817	3.45155	43.9976	44.1275	34.9122	54.1254	3.78796	45.4708	45.3924	36.2063	54.916	3.98322	-1.74985	0.0852483	-2.12078	0.0382961
zo_r_d_r	26.6958	26.8322	19.373	34.4684	2.67184	27.2194	26.8383	21.9371	34.4605	2.92716	26.2336	26.3444	17.773	36.5778	3.03151	27.5316	27.4221	21.8708	34.071	3.31342	-1.03292	0.306115	-2.26137	0.0276619
zo_r_ec_l	80.0604	80.2787	67.9789	89.1134	4.15981	81.3698	80.3662	71.7222	91.8411	4.31009	77.9026	77.5115	68.5644	91.7794	4.421	79.1497	79.3647	66.5715	88.8165	4.44572	-1.73735	0.0876642	-1.59534	0.11599
zo_r_ec_r	31.0425	30.8569	26.6677	36.9598	2.11785	31.9975	31.9624	28.157	35.657	1.74041	30.4166	30.3695	24.7154	39.5038	2.18176	29.7254	29.478	25.5843	35.732	2.22013	-2.98189	0.00394722	1.77448	0.0811958
zo_r_ft_l	87.3046	87.5814	74.8353	96.4404	4.41711	88.9417	88.2978	80.4045	97.8078	4.32862	84.9472	84.7464	76.3958	97.581	4.31475	86.3045	86.2514	74.9364	99.8992	4.26374	-2.13995	0.0364348	-1.80418	0.076253
zo_r_ft_r	47.2464	47.1744	39.1914	55.7375	2.83405	48.1588	47.941	43.3174	55.1926	2.90035	45.0014	44.9204	37.2034	54.0546	3.01274	45.3626	44.5664	40.1565	56.7094	3.667	-1.79474	0.0778913	-0.577986	0.565754
zo_r_ftm_l	85.0224	84.8325	73.7227	94.5313	4.19425	86.2415	85.7939	77.8032	96.3355	4.16877	82.6173	82.4014	72.8908	97.4426	4.46151	83.649	83.8218	71.0524	94.3525	4.41802	-1.65926	0.102336	-1.32405	0.190548
zo_r_ftm_r	38.3853	38.2794	33.0105	45.5332	2.24536	38.9147	38.6905	35.0453	42.9554	2.20557	37.4378	37.4556	31.6023	45.9993	2.13036	36.8974	36.6083	31.6005	43.4031	2.4277	-1.35876	0.179319	1.29351	0.201312
zo_r_l	176.495	176.503	159.002	195.364	7.48063	177.337	175.952	166.693	195.918	6.72208	170.307	170.257	151.402	193.04	6.83168	170.659	170.576	156.112	183.948	7.27761	-0.695654	0.489155	-0.277669	0.782278
zo_r_ms_l	129.115	129.248	108.64	143.047	5.06835	129.933	129.677	120.802	141.711	4.6087	122.225	122.293	108.543	133.636	4.42645	122.248	122.333	113.164	132.188	4.88277	-0.987922	0.326934	-0.0271369	0.978448
zo_r_ms_r	103.958	104.354	90.6582	116.99	5.16366	105.048	104.777	92.8889	115.88	5.055	97.338	97.3922	87.4827	111.459	4.52749	96.2874	95.7748	80.8517	110.659	5.31479	-1.22038	0.227093	1.15397	0.253657
zo_r_orb_d_l	58.1157	58.2076	48.1721	67.6662	3.73971	58.9534	57.7311	49.8447	67.1297	3.65184	56.7588	56.2569	47.9526	68.4619	4.02614	57.9144	58.1079	46.0128	68.008	4.45749	-1.29691	0.199615	-1.49963	0.139403
zo_r_orb_d_r	4.35362	3.81577	0.881182	11.9232	2.59531	4.46669	4.29162	1.12898	7.59256	2.05389	4.13559	3.72193	0.77772	14.4501	2.46099	3.48556	3.01551	0.742796	9.68134	2.25409	-0.296116	0.767993	1.6086	0.112684
zo_r_orb_u_l	66.6873	66.925	57.2416	75.5994	3.89093	67.952	67.8923	61.2101	76.5855	3.78824	65.7915	65.5071	54.8407	78.4604	4.37773	66.9365	66.745	55.4716	77.0064	4.39874	-1.88655	0.0640387	-1.48003	0.144193
zo_r_orb_u_r	33.5257	33.6621	27.4584	40.2885	2.22564	34.3202	34.4719	29.8156	39.5315	2.43301	33.83	33.9637	27.3175	40.7062	2.536	34.3257	33.8624	30.5382	38.7404	1.96873	-1.88522	0.064622	-1.34733	0.182016
zo_r_po_l	119.573	119.817	105.525	129.53	4.49716	120.5	121.302	112.024	130.266	4.21595	115.133	114.68	104.405	127.295	4.25473	115.669	116.101	100.156	124.646	4.75999	-1.23261	0.22237	-0.65232	0.516918
zo_r_po_r	90.2451	90.5673	81.4138	100.874	4.12858	90.4813	90.5894	80.3675	98.2715	4.00797	86.175	86.314	76.7761	96.2921	3.77773	84.7724	84.7454	74.6349	92.3984	3.58733	-0.332866	0.740388	2.19811	0.0317179
zy_l_al_l	80.2677	80.7696	70.9036	90.5256	3.61737	81.2023	80.8917	75.4812	88.0715	3.07572	75.2991	75.2314	66.0988	83.9524	3.42899	75.8584	75.6514	66.2463	82.2358	3.78852	-1.66561	0.100434	-0.853684	0.396963
zy_l_al_r	98.812	99.0358	87.4932	107.13	3.66596	99.7499	100.052	93.1959	107.538	3.52736	93.4271	93.2779	84.3879	104.162	3.39846	94.0298	93.5617	86.5809	99.9218	3.54325	-1.49892	0.139067	-0.973801	0.33424
zy_l_alv	72.6896	73.0038	62.4099	79.7892	3.0554	72.882	72.228	67.4489	79.4064	3.12364	68.1642	68.3332	60.31	75.0511	2.5117	68.1292	67.727	63.1798	73.3703	2.37126	-0.351416	0.726546	0.0829538	0.934157
zy_l_ast_l	84.0585	83.9042	68.5803	96.5384	4.94231	83.2847	82.6612	77.3419	90.5963	3.23019	78.4804	78.0397	69.5625	89.5197	4.63005	77.1966	76.1529	66.2521	89.5778	5.69026	1.21283	0.228423	1.32571	0.190727
zy_l_ast_r	152.697	152.737	136.35	163.945	4.91498	153.341	152.735	144.668	164.796	4.93219	144.93	144.678	134.244	161.381	4.48184	144.294	144.559	136.349	154.63	4.14087	-0.742896	0.460494	0.857208	0.39459
zy_l_b	138.516	138.497	126.335	154.438	4.39975	138.901	138.758	130.564	150.054	4.53592	132.299	132.201	119.726	151.394	4.43938	131.985	131.495	123.338	141.986	4.58807	-0.483897	0.630285	0.391727	0.696701
zy_l_ba	77.9846	78.1435	67.3898	85.2732	3.19819	78.2011	78.3088	72.8307	85.2735	3.25614	73.1014	73.0346	65.5772	83.4017	2.73315	73.1117	73.316	66.9061	80.1469	2.92696	-0.379003	0.706061	-0.0202281	0.983933
zy_l_d_l	79.0131	78.999	69.9414	88.9007	3.31166	79.6257	80.0458	71.3543	86.1463	3.45898	74.2465	74.2181	65.2166	82.9793	3.30392	75.269	74.8687	68.4887	86.4886	3.74303	-1.0144	0.314654	-1.58606	0.118515
zy_l_d_r	98.2398	98.1019	88.1074	106.595	4.00962	99.2431	99.251	89.4846	112.235	4.61972	92.2433	92.4667	82.8557	100.929	3.57134	93.0654	92.5526	85.0386	101.068	3.64437	-1.26433	0.21155	-1.28644	0.203377
zy_l_ec_l	47.2605	47.1054	38.3427	57.7152	3.15252	47.2483	47.6495	36.8759	51.9032	3.27192	44.2667	44.0842	36.603	52.5235	3.18294	45.0258	45.6628	37.8913	52.8527	3.51379	0.0213727	0.983022	-1.24907	0.216896
zy_l_ec_r	126.356	126.529	110.967	135.105	4.25528	127.766	127.844	120.182	141.562	4.51579	120.075	119.747	110.79	130.074	3.79034	120.471	121.105	112.128	127.467	3.61408	-1.79333	0.0782484	-0.616939	0.539562
zy_l_en_ba	78.4563	78.6131	67.9307	86.3894	3.21213	78.6248	78.4837	73.1662	85.7967	3.2942	73.5361	73.5464	65.8684	83.6387	2.7222	73.5187	73.7237	67.3515	80.9456	2.96697	-0.29193	0.77138	0.0338813	0.973093
zy_l_foram_l	78.3632	78.2172	65.1161	87.3933	3.68536	78.7178	78.0557	72.6875	87.6493	4.21549	73.5544	73.5844	64.5136	85.04	3.6843	73.4513	72.1696	65.5266	82.7763	3.87122	-0.489121	0.626731	0.152595	0.879256
zy_l_foram_r	102.774	102.897	91.0182	112.587	3.71998	103.175	102.407	96.6706	111.542	3.81876	97.03	97.1825	89.1032	108.824	3.4395	96.8554	96.0059	90.0159	105.246	3.78161	-0.599305	0.551302	0.266657	0.790722
zy_l_ft_l	58.7566	58.8208	42.4217	69.938	4.77995	59.3375	60.0578	51.1861	65.4247	3.54007	54.8573	54.6771	46.1375	63.5247	3.53361	56.2845	56.2897	47.456	63.2076	3.88256	-0.865903	0.389232	-2.12382	0.0381569
zy_l_ft_r	131.167	131.531	114.433	140.397	4.70156	132.259	131.963	123.632	143.811	4.83968	124.582	124.556	115.567	134.955	3.80155	125.335	125.513	116.83	131.96	3.8227	-1.28849	0.202696	-1.11875	0.267789
zy_l_ftm_l	51.3208	51.3242	42.6956	61.978	3.28827	51.289	51.998	42.7879	58.9112	3.49349	48.9015	48.9529	39.8831	59.3474	3.59344	49.3557	49.0998	41.9822	57.2728	3.74509	0.0522824	0.958487	-0.694287	0.490301
zy_l_ftm_r	131.556	131.716	114.564	140.309	4.34398	132.644	132.856	124.835	146.772	4.70531	124.888	124.866	115.972	135.891	3.83202	125.307	125.586	116.697	130.911	3.69697	-1.33356	0.187748	-0.638835	0.525333
zy_l_l	147.25	147.055	131.138	165.863	6.10211	147.092	146.441	134.991	160.396	5.64871	141.122	140.988	126.587	163.53	6.20716	140.899	140.672	124.055	156.662	8.02346	0.156256	0.876333	0.164172	0.870248
zy_l_ms_l	54.1437	54.1357	42.3559	72.6629	4.51768	54.1364	53.9301	44.9927	60.5919	3.19442	50.3121	50.4677	41.3618	62.9015	4.02443	48.8687	49.2012	39.5566	58.4064	4.69109	0.0118599	0.990567	1.79427	0.0784135
zy_l_ms_r	135.248	135.468	116.571	144.641	4.41016	136.498	136.043	128.568	147.182	4.61713	126.78	126.909	117.505	139.281	4.03275	126.631	126.053	119.479	132.927	3.29924	-1.55087	0.126443	0.245935	0.806454
zy_l_ns_l	87.8609	88.3645	76.172	99.603	3.93017	88.8566	88.8911	82.3846	100.621	3.65349	82.6229	82.8036	73.1214	91.0185	3.52876	83.107	82.8482	75.6207	89.6711	3.67827	-1.52517	0.132262	-0.753385	0.454296
zy_l_ns_r	95.6802	96.1686	83.1573	105.37	3.8175	96.4241	96.469	90.5398	104.979	3.42029	90.3886	90.5659	81.0839	100.262	3.48633	90.8158	90.1076	82.8541	98.4321	3.74156	-1.20722	0.231764	-0.657062	0.513816
zy_l_o	100.822	100.659	88.3898	112.711	4.42003	101.004	100.87	93.6463	112.064	4.44984	95.5248	95.3841	86.1536	107.993	3.95123	95.1138	94.7514	86.5308	105.742	4.08501	-0.232476	0.816975	0.575154	0.567421
zy_l_orb_d_l	61.2954	61.4598	45.6593	70.7755	3.67762	61.9687	62.8916	53.6729	67.7892	3.12015	57.357	57.4333	48.7195	65.6582	3.27611	58.1516	58.1975	51.2355	65.3951	3.78766	-1.18208	0.241322	-1.22184	0.227092
zy_l_orb_d_r	110.349	110.812	94.4545	118.558	4.03255	111.475	112.213	103.698	122.985	4.31558	104.667	104.663	94.6404	114.437	3.59224	105.106	104.964	96.4332	110.754	3.63388	-1.50172	0.138744	-0.687228	0.494648
zy_l_orb_u_l	74.9408	75.13	63.8355	84.2262	3.47134	75.6171	75.183	67.601	81.9621	3.31069	70.6852	70.3473	63.2107	80.1524	3.1207	71.2328	71.2394	65.108	79.9318	3.64778	-1.1495	0.25482	-0.875741	0.385087
zy_l_orb_u_r	118.521	118.881	103.716	126.299	4.08593	119.728	120.504	112.001	132.32	4.40514	112.617	112.464	103.292	121.763	3.70787	113.155	113.099	104.1	121.056	3.762	-1.57727	0.12035	-0.814616	0.418595
zy_l_po_l	34.0659	33.9039	25.0837	45.3871	3.65776	33.6527	33.5976	26.9806	42.5321	3.1923	32.09	31.9794	20.2676	42.6427	3.83732	30.883	31.0332	24.2238	40.7121	4.32437	0.714001	0.47775	1.61914	0.111175
zy_l_po_r	133.054	133.353	116.607	146.952	5.14684	133.903	132.731	124.241	146.181	5.05627	126.548	126.203	115.751	137.389	4.45161	126.227	126.128	120.486	134.334	3.20617	-0.950196	0.345831	0.523294	0.602228
zy_l_ra_l	27.2195	27.1717	16.3853	38.8297	3.9253	26.9064	26.7715	19.8398	34.6659	3.66285	23.6388	23.9557	13.8041	37.8929	5.1936	22.7252	22.3518	12.0868	35.3695	6.21332	0.478705	0.633825	0.860721	0.393283
zy_l_ra_r	136.32	136.565	117.671	148.951	5.07205	137.02	136.19	128.652	148.909	5.03553	128.316	128.067	116.426	138.656	4.2517	128.199	128.298	120.571	134.899	3.38784	-0.789482	0.432969	0.185688	0.853214
zy_l_zma_l	45.2127	45.4369	36.0208	53.4881	3.62054	45.8938	45.683	39.3965	54.0806	3.59143	42.4487	42.4439	31.8854	49.7613	3.47683	43.2048	43.1203	34.4244	51.0833	4.00752	-1.07574	0.286386	-1.09831	0.276948
zy_l_zma_r	121.534	121.312	106.46	134.453	4.81222	122.736	121.931	112.876	136.069	5.22592	115.253	115.066	101.303	129.038	4.04234	115.524	115.492	106.377	124.781	3.91296	-1.3262	0.190165	-0.390849	0.69728
zy_l_zo_l	63.6545	63.5546	53.3542	73.3844	3.83172	63.5361	64.0967	55.6753	69.8347	3.87137	59.3822	59.5413	50.6414	69.7666	3.87912	60.1198	59.7057	53.4228	68.5846	3.90519	0.174136	0.862358	-1.07439	0.287033
zy_l_zo_r	107.314	107.586	93.2811	116.931	4.35642	108.628	108.573	99.9231	117.581	4.44585	102.264	102.083	89.9204	115.981	4.39927	103.602	103.788	92.5113	111.935	4.54286	-1.68472	0.0973919	-1.68234	0.0978982
zy_l_zy_r	136.564	136.88	117.362	150.337	5.27907	137.732	136.583	127.182	151.36	4.93879	128.075	128.262	116.656	140.47	4.31035	128.316	128.526	119.34	136.89	3.79427	-1.32548	0.189863	-0.352287	0.725756
zy_r_al_l	99.5887	99.6031	89.2445	111.073	3.83805	100.436	100.437	92.2234	109.104	3.51592	93.5596	93.7123	84.6926	102.09	3.41912	93.4702	92.8665	85.8803	99.9124	3.22508	-1.34483	0.183483	0.155563	0.876885
zy_r_al_r	81.1028	81.1734	70.755	93.6627	3.74364	81.8426	81.0645	73.6116	89.4342	3.36401	75.7022	75.7874	66.3491	85.4517	3.42521	75.5583	75.2926	67.5824	82.1537	3.23545	-1.2215	0.226359	0.249838	0.803543
zy_r_alv	72.9581	72.9592	62.3257	79.6276	3.0147	73.6895	73.1236	69.5563	81.659	2.78792	68.3986	68.4083	62.0339	74.8283	2.53894	68.7396	68.8249	64.6852	73.8332	2.3337	-1.46659	0.147481	-0.815771	0.417702
zy_r_ast_l	151.698	151.581	133.181	161.185	4.66955	151.656	151.358	143.797	165.057	4.27392	143.967	143.877	134.146	154.972	4.04109	144.315	144.356	133.159	153.95	4.32716	0.0539391	0.957154	-0.46301	0.645138
zy_r_ast_r	83.1036	83.0208	68.4995	94.6415	4.71317	82.4974	82.4857	74.1078	92.653	4.62013	78.7266	78.6021	64.8732	102.098	5.35947	77.8834	77.8451	66.4992	91.2705	5.30983	0.742528	0.460665	0.900444	0.371513
zy_r_b	138.878	138.617	127.903	153.269	4.18184	139.798	140.454	128.917	151.455	5.02181	132.502	132.317	123.32	149.389	4.34827	132.188	132.055	122.617	141.984	4.24384	-1.07265	0.288314	0.418362	0.677172
zy_r_ba	77.8324	77.9874	68.2822	83.8412	3.05981	78.714	78.2245	72.4776	89.0843	3.15455	73.3879	73.4793	66.6171	81.2403	2.75983	73.8412	73.6198	68.8781	81.4337	2.63576	-1.59662	0.115798	-0.968062	0.336825
zy_r_d_l	99.0273	98.9886	87.1643	110.703	3.99668	100.075	99.5045	92.2204	113.304	4.22294	92.5742	92.8467	84.0582	102.865	3.60107	93.1462	92.6814	85.3811	100.352	3.41077	-1.42393	0.159927	-0.942433	0.349654
zy_r_d_r	79.6623	79.505	70.7031	90.9876	3.70226	80.1407	80.268	72.2918	86.2001	3.45809	74.5382	74.5433	67.1206	82.4773	3.12225	74.9354	74.6077	68.687	82.66	3.61044	-0.774926	0.441317	-0.640674	0.524453
zy_r_ec_l	127.358	127.495	112.852	138.225	4.44349	128.56	128.74	121.546	141.525	4.35746	120.305	120.25	110.651	131.682	3.91045	120.695	120.765	112.448	127.237	3.20648	-1.56153	0.123661	-0.66075	0.510952
zy_r_ec_r	47.7097	47.4419	39.9766	56.8211	3.28196	47.6196	48.0249	38.3433	54.4167	3.60867	44.2177	44.3031	36.6257	52.315	3.143	44.4383	44.9707	37.3087	51.5555	3.47685	0.144162	0.885895	-0.366941	0.715065
zy_r_en_ba	78.2935	78.426	68.5608	84.1766	3.07117	79.1339	78.6499	72.7948	89.4716	3.17152	73.8339	73.9171	66.9157	81.5281	2.79444	74.2561	74.0549	69.2431	82.2318	2.70056	-1.5143	0.135399	-0.881987	0.381267
zy_r_foram_l	102.189	101.878	90.0563	113.047	3.63175	102.883	103.145	96.5255	110.925	3.60149	96.7826	96.5835	87.8282	106.579	3.44551	97.2467	97.9585	90.8088	106.116	3.84038	-1.09292	0.278833	-0.699825	0.486986
zy_r_foram_r	77.5656	77.4734	67.1572	85.7338	3.56173	78.1685	78.0989	72.3669	87.498	3.94826	73.2976	73.3948	64.2161	84.2486	3.59005	73.5935	73.0266	66.9729	83.2112	3.64587	-0.883468	0.380815	-0.462362	0.645538
zy_r_ft_l	131.627	131.628	115.05	141.503	5.00009	132.969	132.64	124.337	146.64	4.72428	124.73	124.553	114.073	136.862	3.92991	125.261	125.115	116.094	132.075	3.42726	-1.59535	0.115744	-0.854621	0.395857
zy_r_ft_r	58.8283	58.6698	44.2976	70.4197	4.79215	59.363	59.2885	49.1024	65.8045	4.09508	54.3067	54.3031	45.2088	64.479	3.61353	55.2601	55.3325	47.6297	62.9097	3.73826	-0.716627	0.476092	-1.45815	0.150218
zy_r_ftm_l	132.155	132.246	116.101	142.89	4.54556	133.28	133.143	126.199	147.49	4.47205	124.902	125.014	114.999	136.564	3.99301	125.048	125.22	116.89	131.257	3.29488	-1.42373	0.159719	-0.240706	0.810494
zy_r_ftm_r	51.7692	51.651	43.9858	61.0997	3.42187	51.5225	51.8185	42.3572	58.9197	3.95633	48.6359	48.62	38.9123	55.9436	3.44094	48.9975	49.4631	41.6631	56.8983	3.55077	0.363089	0.717961	-0.582	0.562829
zy_r_l	146.835	146.199	130.911	165.046	6.24605	147.512	147.748	137.267	160.498	5.36546	141.465	141.069	127.804	162.301	6.24446	141.744	141.167	128.365	157.149	6.81676	-0.69335	0.490495	-0.235854	0.814411
zy_r_ms_l	134.654	134.965	114.424	144.152	4.53853	135.399	134.238	126.876	147.077	4.26169	126.263	126.307	114.773	135.532	3.88049	126.402	126.829	118.688	133.945	3.74932	-0.980318	0.330739	-0.209263	0.834944
zy_r_ms_r	53.64	53.8448	41.0246	66.9717	4.32623	54.1677	53.9034	44.021	62.6632	3.96528	50.2917	49.8689	37.9455	64.1804	4.23887	49.7182	49.4104	39.8109	58.1661	3.97772	-0.74253	0.460517	0.808475	0.421908
zy_r_ns_l	96.5828	96.8392	86.1696	109.998	3.79886	97.1388	96.8108	87.5938	103.761	3.2387	90.6937	90.7092	81.7087	99.6136	3.49371	90.5491	90.0106	83.7698	97.8586	3.21598	-0.941513	0.349813	0.251063	0.802583
zy_r_ns_r	89.0399	88.8687	78.9863	104.006	4.00697	89.7339	89.0575	80.0305	96.6839	3.46604	83.1161	83.4246	73.3653	90.8938	3.69458	83.4099	82.9968	76.5987	90.8324	3.44069	-1.1022	0.274358	-0.478011	0.634313
zy_r_o	100.401	100.162	89.0355	109.787	4.14932	101.275	101.159	93.5166	110.394	4.18455	95.7778	95.8534	84.8139	106.89	3.91022	95.8282	95.3256	89.0056	106.941	3.96744	-1.18834	0.23948	-0.0723612	0.942561
zy_r_orb_d_l	111.504	111.493	98.3766	121.201	4.18502	112.576	112.996	105.497	125.411	4.11906	105.233	105.311	95.9967	114.977	3.70258	105.638	105.543	96.2697	112.078	3.46806	-1.47381	0.145777	-0.654475	0.515222
zy_r_orb_d_r	62.6639	62.8017	48.7059	72.5103	3.62973	63.0633	62.789	56.0911	69.8173	3.17798	58.0856	58.1076	49.94	66.9424	3.39365	58.4754	58.5776	52.064	67.9455	3.41353	-0.693862	0.490216	-0.649407	0.518601
zy_r_orb_u_l	119.404	119.397	106.558	128.329	4.2599	120.623	120.984	112.128	134.51	4.34504	112.911	112.826	103.908	122.649	3.7524	113.104	112.781	104.124	120.175	3.58436	-1.59894	0.115241	-0.30443	0.761833
zy_r_orb_u_r	75.9178	75.7453	62.9773	84.8075	3.61888	76.6687	76.9297	68.7988	84.1253	3.37202	71.1517	71.2372	64.7315	81.0479	2.9905	71.4296	71.8286	65.2331	81.0784	3.34764	-1.24697	0.217071	-0.480988	0.632438
zy_r_po_l	131.968	132.039	115.026	144.684	5.14982	132.918	132.268	125.492	146.511	5.04008	125.443	124.903	115.247	137.125	4.1634	125.642	126.055	116.171	134.607	3.96799	-1.06645	0.29049	-0.282373	0.778609
zy_r_po_r	34.0086	33.6197	25.6821	42.1726	3.21747	33.5983	32.7168	26.2897	40.5214	3.21235	32.9329	32.7313	23.5943	47.3202	3.99891	31.8253	31.2922	25.4363	40.4279	4.34427	0.725439	0.471041	1.47018	0.14712
zy_r_ra_l	136.196	136.368	116.721	149.033	5.01097	137.029	135.735	128.307	150.531	4.89495	128.169	128.058	117.106	138.286	4.08826	128.244	128.493	121.577	137.823	3.97136	-0.962402	0.339701	-0.106865	0.91525
zy_r_ra_r	25.4999	25.4556	14.0009	37.7257	4.41747	24.8115	23.8214	18.9332	33.9248	3.79267	23.3427	23.8366	10.7337	43.1793	5.54999	22.5831	22.2114	12.2553	35.3346	5.83995	0.997281	0.322227	0.745924	0.458775
zy_r_zma_l	122.423	122.368	107.006	139.459	4.94077	123.67	123.284	117.158	134.665	4.00491	115.324	115.507	101.337	127.704	4.28298	115.263	115.944	105.273	121.853	3.6048	-1.68466	0.0964822	0.0925579	0.926527
zy_r_zma_r	45.7904	45.5668	35.4763	57.6581	3.54558	46.593	46.5519	37.3371	54.5836	3.19675	42.3325	42.4053	30.5536	50.7752	3.65314	42.5484	42.7908	33.344	49.445	3.70014	-1.39565	0.167638	-0.332256	0.740882
zy_r_zo_l	109.351	109.163	93.4401	120.644	4.53174	111.18	111.17	103.342	124.703	4.96215	103.814	103.883	91.0556	112.845	4.12373	104.064	104.151	94.5666	112.085	3.7076	-2.12827	0.0377599	-0.374656	0.709151
zy_r_zo_r	65.7924	65.4011	57.4713	75.8704	3.86374	66.4248	66.084	60.4092	73.6874	3.66611	60.9105	60.8487	44.015	72.9934	3.96274	60.3963	60.2321	53.7956	70.2471	4.07469	-0.969509	0.33609	0.720658	0.474016

## Sheet: All sex dimorphism
	Train (males)					Train (females)					t-test (train)		Test (males)					Test (females)					t-test (test)
	mean	median	min	max	std	mean	median	min	max	std	t	P	mean	median	min	max	std	mean	median	min	max	std	t	P
al_l_al_r	24.4231	24.3995	20.2299	31.729	2.18658	23.768	23.9015	17.8285	30.6457	1.98122	2.86889	0.00438551	24.5393	24.3497	20.7517	27.9053	1.90316	23.8565	24.178	19.1025	26.7988	1.96457	1.57866	0.118465
al_l_b	148.697	148.725	133.406	164.576	5.36357	141.555	141.772	129.191	164.354	5.68561	11.8087	4.32151e-27	149.063	148.728	139.904	162.288	4.75357	141.217	141.364	132.438	153.249	5.00216	7.19098	3.44439e-10
al_l_d_l	38.629	38.4628	30.9582	46.4533	2.80152	34.9642	35.4218	23.4054	44.776	4.05449	9.60968	3.36462e-19	38.9773	38.7979	33.7217	46.3213	3.19763	35.8239	35.4397	28.0735	43.1506	3.47609	4.22262	6.51803e-05
al_l_d_r	46.1012	45.8839	36.9058	53.6288	3.00446	42.1301	42.28	34.7092	51.1835	3.76507	10.6536	7.5074e-23	46.3953	46.2124	39.0929	53.3121	3.60831	42.6043	42.2967	37.0556	50.6627	3.80488	4.57236	1.79023e-05
al_l_ec_l	53.2274	53.3677	46.4239	58.7277	2.51238	50.3256	50.3072	43.2766	57.9066	2.74589	10.0756	5.45378e-21	53.8658	53.8554	49.2129	58.7601	2.48818	50.7126	50.7879	43.7972	55.5151	2.52096	5.63026	2.72526e-07
al_l_ec_r	72.6909	73.1244	64.8073	80.3859	2.86709	69.7768	69.6339	63.3713	77.0192	2.72953	9.51328	3.9538e-19	73.7329	73.4924	68.9929	80.4411	2.58966	69.5934	69.4116	64.1295	75.6283	2.57474	7.16925	3.74681e-10
al_l_ft_l	69.2924	69.6188	57.7476	79.9311	3.81801	64.7904	64.7169	55.5697	76.1626	3.98059	10.5479	1.2765e-22	70.4248	70.1715	63.0135	77.2856	3.43585	65.6719	64.7957	56.5566	77.8626	4.64313	5.20408	1.77258e-06
al_l_ft_r	85.3583	85.1895	74.1529	95.3832	3.60735	80.7453	80.7061	72.8415	92.6376	3.56857	11.7485	6.93583e-27	86.1403	85.4982	80.6129	93.8326	3.01191	81.1426	80.8032	72.8796	92.6295	4.12047	6.19291	3.35252e-08
al_l_ftm_l	60.5498	60.7803	52.8956	69.0991	2.99244	57.3381	57.3631	49.4466	66.6424	2.93848	9.8962	2.1029e-20	61.0018	60.6339	54.8012	67.5079	2.72998	57.3848	57.1605	51.0844	62.4778	2.76801	5.88401	9.50158e-08
al_l_ftm_r	79.4949	79.6013	68.6864	89.0865	3.23144	76.0021	76.0472	69.6932	85.3192	2.91666	10.3693	5.55256e-22	80.1583	80.0231	75.2472	88.1884	2.73297	75.8518	75.7837	69.1555	84.3464	2.93557	6.79079	2.00322e-09
al_l_l	186.594	186.149	167.506	208.054	8.00417	178.548	177.851	157.941	201.59	7.25477	9.62574	1.74502e-19	187.052	186.306	176.909	206	6.70407	178.609	177.518	164.16	193.605	7.85	5.17255	1.81443e-06
al_l_ms_l	110.438	110.062	93.254	124.694	5.1938	104.194	104.393	89.4165	122.121	4.55583	11.6792	1.43726e-26	111.052	110.667	105.181	121.061	3.83023	103.013	103.845	92.7794	111.801	5.11598	7.95594	1.81144e-11
al_l_ms_r	122.83	123.426	108.105	132.805	4.55914	116.046	115.995	104.491	131.27	4.11746	14.2714	2.7185e-36	124.141	124.868	108.074	133.432	4.84326	115.109	114.984	105.986	127.5	4.794	8.38268	1.70535e-12
al_l_orb_d_l	25.5016	25.3524	20.0673	30.8269	2.08993	23.6098	23.6815	18.1896	29.1705	2.15631	8.14115	8.00279e-15	25.6791	25.4206	21.4208	29.8816	1.99384	23.916	23.8488	19.4683	29.7095	2.18199	3.77258	0.000314563
al_l_orb_d_r	46.1696	46.5561	39.7079	53.9633	2.42668	44.2119	44.3109	37.3996	51.3649	2.17351	7.76583	1.04573e-13	46.5398	46.4951	41.7803	52.0125	2.24129	43.9753	44.0352	39.6652	50.7978	2.16514	5.20477	1.53518e-06
al_l_orb_u_l	52.2114	52.0818	44.2443	61.1943	3.06775	49.7205	49.5135	39.7	57.3766	2.97423	7.53363	4.7319e-13	52.8533	52.9009	47.5318	57.4854	2.83297	50.098	49.6728	43.2335	55.7393	3.00327	4.22076	6.54193e-05
al_l_orb_u_r	65.1099	65.2782	56.5072	74.4886	2.94961	62.3642	62.7695	55.5543	68.7875	2.86395	8.63029	2.58957e-16	65.6945	66.0485	60.8454	70.5517	2.65241	62.5798	62.7177	55.5931	70.4649	2.73377	5.17156	1.75172e-06
al_l_po_l	101.662	101.224	90.7573	114.127	4.51287	96.6488	96.7365	86.0323	106.189	3.81791	10.959	5.65028e-24	102.254	102.469	95.144	109.158	3.27091	96.2418	96.5166	82.7476	103.976	4.09773	7.25221	3.24737e-10
al_l_po_r	116.457	116.579	104.345	126.752	4.22564	111.387	111.42	101.441	121.109	3.79579	11.536	4.48409e-26	116.965	116.927	103.122	125.92	4.08447	110.333	110.133	100.282	117.585	3.60706	7.69736	3.93212e-11
al_l_zma_l	41.0081	41.1358	31.2152	50.7684	3.30278	38.3577	38.4305	30.58	46.0031	2.93965	7.74615	1.19586e-13	41.5136	41.9333	35.1134	47.2107	2.75244	38.2386	38.364	31.2865	44.6736	3.132	4.96766	4.00807e-06
al_l_zma_r	63.0106	62.7861	49.3907	72.702	3.82105	60.34	60.3542	52.7881	70.8159	3.14201	6.97628	1.74737e-11	63.3462	63.5623	57.5685	72.0971	3.88358	60.0867	59.7953	52.7677	68.1375	3.41958	3.98393	0.000153007
al_l_zo_l	23.4238	23.3047	16.5655	29.3049	2.35708	21.5852	21.4781	14.4867	30.7534	2.74944	6.5607	2.11682e-10	24.2115	23.9876	18.5127	29.9924	2.63949	21.6869	21.7886	13.2795	26.0495	2.65641	4.26389	5.58053e-05
al_l_zo_r	42.7123	42.3364	34.5044	52.2704	3.10018	41.1051	40.9923	34.3167	50.6791	3.09649	4.74021	3.17237e-06	42.9739	42.8011	36.3512	49.8568	2.80986	41.7796	42.0899	33.7588	50.0739	3.66669	1.63502	0.106348
al_r_b	148.592	148.3	131.31	163.479	5.49585	141.645	141.942	128.641	162.652	5.78229	11.2529	4.29021e-25	149.088	149.3	140.05	162.311	4.81008	141.269	141.525	131.926	154.045	5.08374	7.0652	5.99603e-10
al_r_d_l	45.7383	45.5956	38.0026	53.1581	2.94388	42.2367	42.526	30.4883	50.4422	3.75784	9.4791	6.54021e-19	46.3137	46.4777	40.3653	52.7746	3.21715	43.0241	42.3269	35.9778	51.0547	3.37314	4.46336	2.68873e-05
al_r_d_r	38.684	38.4902	29.9058	46.4097	3.04163	34.8516	35.252	25.6939	43.1735	4.20239	9.54703	4.726e-19	38.8921	39.1591	31.4093	45.7944	3.68051	35.437	34.8545	27.389	43.0538	4.0015	4.01937	0.000134294
al_r_ec_l	72.7826	72.8267	64.6099	81.1378	2.94215	69.63	69.543	63.267	78.698	2.84409	9.95579	1.33251e-20	73.604	73.8338	67.8718	79.4289	2.84917	70.0753	69.7257	64.011	74.954	2.49029	5.89771	9.37779e-08
al_r_ec_r	52.9966	53.0542	45.3154	59.5001	2.55696	50.5544	50.5166	43.9221	57.8381	2.61427	8.63053	2.58202e-16	53.9562	53.7243	48.4653	58.1293	2.41554	50.2612	50.3415	45.8494	56.996	2.50014	6.72211	2.66043e-09
al_r_ft_l	85.078	85.216	72.6886	95.0291	3.81485	80.7524	80.7752	72.7795	91.2802	3.60575	10.649	5.75108e-23	86.315	85.5807	81.0352	93.7669	3.35393	81.6012	81.4584	73.9383	91.7221	3.95616	5.74814	1.77961e-07
al_r_ft_r	69.2265	69.2191	59.319	78.7242	3.60988	64.669	64.8852	55.8481	75.6468	4.05801	10.8439	1.29222e-23	70.0339	69.7223	61.9178	78.3135	3.32554	65.0896	64.4163	55.1486	77.9152	4.50658	5.58323	3.96195e-07
al_r_ftm_l	79.2327	79.4343	69.756	88.6642	3.27653	75.6906	75.7818	68.5755	85.7384	3.0328	10.2526	1.35398e-21	79.9026	79.7545	74.5412	87.1378	2.90135	75.8347	75.5624	69.7998	80.6041	2.8554	6.32015	1.50038e-08
al_r_ftm_r	60.604	60.6714	52.0992	67.7586	2.93551	57.6163	57.6719	49.0704	66.0114	2.90191	9.35367	1.2996e-18	61.1537	60.9029	56.2697	67.7384	2.79376	57.3772	57.3241	51.1737	62.6417	2.80835	6.02943	5.15581e-08
al_r_l	186.558	185.989	165.529	207.492	8.19214	178.791	177.952	157.45	200.786	7.3159	9.13848	6.76755e-18	187.077	186.587	175.561	206.707	7.17423	178.901	178.607	163.859	193.066	7.53678	4.96968	3.89551e-06
al_r_ms_l	122.172	121.741	103.052	135.098	5.15232	115.678	116.238	100.745	131.265	4.29763	12.5082	1.59764e-29	122.733	122.231	115.781	132.306	4.02683	114.832	114.592	106.974	124.615	4.76951	8.00564	1.08535e-11
al_r_ms_r	111.104	111.736	96.1209	122.509	4.82086	104.861	105.134	93.132	119.946	4.34966	12.4259	2.53827e-29	112.325	112.798	95.8325	120.675	4.89212	103.848	103.231	93.3451	115.468	4.76611	7.84928	1.84922e-11
al_r_orb_d_l	46.5934	46.5323	41.3033	52.4818	2.43332	44.6518	44.572	39.2708	51.6488	2.28532	7.51604	5.34028e-13	46.9904	46.7059	41.9283	53.2323	2.41552	45.0459	45.0113	39.5063	49.3377	2.32731	3.66633	0.000447633
al_r_orb_d_r	25.1032	25.1295	19.027	32.1268	2.08804	23.308	23.2348	18.1908	28.5758	2.02355	7.97873	2.43066e-14	25.2719	24.9704	22.4436	29.3035	1.82671	22.9959	23.0133	18.9257	28.9826	2.15402	5.09663	2.45667e-06
al_r_orb_u_l	65.0145	64.9651	56.0766	72.0608	3.05074	62.4402	62.1179	55.6413	69.3333	2.75977	8.0869	1.18928e-14	65.8421	65.6797	60.4329	71.2229	2.77023	62.8293	62.6573	56.1868	68.2909	2.9511	4.70766	1.07411e-05
al_r_orb_u_r	52.1055	52.1175	43.5879	60.0081	2.97745	49.6253	49.2377	40.4033	57.3514	3.08865	7.47107	7.12183e-13	52.7106	53.0438	46.2958	57.8919	2.70657	49.8764	49.6535	42.7797	56.1555	2.82019	4.58578	1.69998e-05
al_r_po_l	115.054	115.262	102.499	126.578	4.60316	109.998	110.151	99.4395	120.452	3.7103	11.0514	3.05328e-24	115.682	115.779	108.125	124.407	3.67344	109.793	110.114	97.7487	117.536	3.74989	7.09467	5.20948e-10
al_r_po_r	103.007	103.158	91.2962	113.945	4.18551	98.3561	98.2443	88.6724	108.945	3.78995	10.6441	6.24774e-23	103.363	103.023	89.7115	111.281	4.06193	97.1896	97.8133	87.6838	102.871	3.44013	7.33542	2.04552e-10
al_r_zma_l	63.0599	63.2488	53.4819	76.018	3.66513	60.0402	60.0178	53.5642	69.3205	3.18827	8.03318	1.75701e-14	63.642	63.453	58.2309	70.3177	2.63102	60.0302	60.2684	52.6478	66.5227	3.15387	5.56157	3.86283e-07
al_r_zma_r	41.1172	41.5463	30.3483	49.6788	3.38044	38.8974	38.9236	30.2791	46.639	2.9161	6.42547	4.67618e-10	41.2254	40.9004	35.4552	48.0736	3.34426	38.6194	38.2389	32.5297	46.9749	3.10273	3.61288	0.000535548
al_r_zo_l	43.9345	43.8748	34.6553	52.1973	3.05879	42.458	42.5405	35.7036	53.0337	3.15605	4.34137	1.88311e-05	45.1805	45.1774	39.0603	52.9711	3.61085	42.6933	42.5923	35.5102	48.5983	2.94393	3.37652	0.0011662
al_r_zo_r	22.6533	22.7899	14.627	29.0725	2.39854	20.8151	20.4427	15.1921	27.4166	2.41293	6.98208	1.59137e-11	22.547	22.4445	17.4888	28.1858	2.20903	21.1156	20.9879	14.9688	29.1778	2.92276	2.47101	0.0158206
alv_al_l	49.1277	48.9281	42.4188	56.366	2.8046	46.2629	46.3386	40.6884	54.8312	2.58418	9.70781	9.21443e-20	49.4232	49.6254	43.2258	54.0146	2.44734	45.91	46.5736	36.402	51.1721	3.2792	5.43032	7.20877e-07
alv_al_r	49.1282	49.1024	42.756	55.9795	2.88894	46.4864	46.4214	39.8012	55.4044	2.66433	8.68706	1.75826e-16	49.5016	49.4873	44.2498	54.9602	2.44156	46.441	47.242	37.0196	50.8628	3.03122	4.9733	4.08912e-06
alv_b	144.373	144.54	129.348	159.734	5.0817	137.961	137.819	126.199	151.212	5.01069	11.6108	2.18806e-26	144.409	144.56	132.398	157.002	5.54651	137.436	137.358	125.105	148.389	5.04644	5.88072	9.84297e-08
alv_d_l	64.122	64.002	55.1153	76.4216	3.44336	59.5033	59.7374	49.3843	68.3994	3.77001	11.6898	1.21706e-26	64.2566	63.8325	56.5434	74.0976	4.05802	60.1972	60.0471	48.996	68.5197	4.19852	4.39693	3.43422e-05
alv_d_r	64.0469	64.1161	53.178	76.1473	3.68297	59.4197	59.3708	51.052	68.3202	3.8928	11.1585	9.33016e-25	64.1372	64.3442	57.4917	75.286	4.54785	59.9612	59.4387	48.2564	72.2609	4.68398	4.04544	0.000121979
alv_ec_l	72.6328	72.6963	64.7037	80.6989	2.88061	68.8145	68.9278	62.1995	77.3121	2.75937	12.3699	3.72336e-29	72.5564	72.5434	66.6821	79.2842	2.95619	68.8387	68.6826	64.779	76.0429	2.25809	6.32076	1.84508e-08
alv_ec_r	72.0244	72.0776	63.5991	79.0931	2.96942	68.7856	68.561	61.304	77.1101	2.87868	10.1203	3.70511e-21	72.6398	72.1272	65.041	81.0884	3.3564	68.9369	68.3419	64.2855	75.7861	2.56483	5.544	4.47106e-07
alv_ft_l	86.4886	87.0923	69.8755	94.7498	4.35395	81.7025	81.6654	74.4491	91.9091	3.41922	11.1723	1.2532e-24	86.9287	87.3698	74.4771	96.2796	4.27217	82.2452	81.6314	74.1027	98.1702	4.13387	4.98272	3.69435e-06
alv_ft_r	86.2256	86.5757	71.7023	96.0623	4.21348	81.4015	81.212	72.8789	91.6575	3.58857	11.2641	4.68891e-25	86.7434	86.4579	79.2055	97.9539	4.09981	82.1916	81.8219	75.5766	98.5531	4.39377	4.79048	7.83056e-06
alv_ftm_l	80.3795	80.436	69.5665	89.4855	3.29035	76.4927	76.4181	69.6842	85.4684	2.86327	11.5157	5.66003e-26	80.198	80.6102	72.7838	89.705	3.53866	76.1085	75.9634	70.0309	83.5758	2.59054	5.89763	1.12282e-07
alv_ftm_r	80.1914	80.5252	70.1979	88.2498	3.24505	76.521	76.4119	67.936	83.8846	2.98751	10.7536	2.54899e-23	80.3615	80.0857	73.1884	90.8075	3.74753	76.7467	76.9258	72.2344	84.0682	2.69589	4.95218	4.80196e-06
alv_l	150.868	150.664	133.772	172.311	7.24933	145.438	145.103	126.063	161.97	6.62948	7.14232	5.91644e-12	150.98	148.991	138.132	167.684	6.78954	145.667	146.694	131.047	157.464	6.75484	3.50862	0.000751135
alv_ms_l	77.9177	77.9761	62.7136	89.9494	3.76826	73.5888	73.5387	63.5807	86.9576	3.63442	10.6855	4.23919e-23	77.9345	77.9952	72.428	85.4465	3.39305	72.755	72.9418	66.3044	80.3584	3.63192	6.5908	4.75597e-09
alv_ms_r	78.5278	78.9665	65.8473	87.2494	3.58934	74.2763	74.4006	66.2325	85.1057	3.27301	11.3105	2.80291e-25	79.6623	79.4104	70.5504	86.171	3.58597	73.8555	73.2333	68.543	82.2049	3.15547	7.68849	4.10863e-11
alv_ns_l	48.2904	48.1219	41.247	57.1348	2.97952	45.371	45.088	39.0264	53.7248	2.90067	9.07261	1.04858e-17	48.6741	49.0071	40.0618	53.5846	2.74709	45.0613	45.2299	37.9429	51.6305	3.4539	5.17749	1.85776e-06
alv_ns_r	48.5479	48.3536	41.5571	58.3327	3.08098	45.4982	45.3415	37.4551	53.273	2.93916	9.25545	2.72832e-18	48.8562	49.1569	41.0676	54.455	2.63945	45.5829	45.8034	38.3741	52.36	3.36526	4.84051	6.92193e-06
alv_orb_d_l	56.176	56.4428	48.0548	64.6345	2.90875	52.8458	52.6325	45.8996	59.5573	2.55512	11.1157	1.46656e-24	56.2651	56.6398	50.6824	63.4757	2.66363	52.9976	52.5271	46.0797	60.3912	2.87052	5.27724	1.15747e-06
alv_orb_d_r	55.9846	56.1633	49.2327	62.1748	2.98954	52.7766	52.6011	44.8908	58.8929	2.67407	10.3359	7.30636e-22	56.2567	56.2264	47.7167	63.4857	2.75971	53.0528	52.7581	46.7643	61.093	2.89016	5.07066	2.61849e-06
alv_orb_u_l	80.0815	80.4737	70.9775	87.4796	3.31065	76.1455	76.1861	69.0705	83.9637	2.90599	11.5466	4.30077e-26	80.3713	80.5945	73.086	88.6729	3.6106	76.0078	75.5226	69.0366	84.0392	2.98108	5.89405	9.95308e-08
alv_orb_u_r	79.9992	80.2614	71.0263	87.5924	3.31645	76.1933	76.2759	67.9626	82.8218	3.1211	10.7995	1.72382e-23	80.5324	80.427	71.2251	89.6797	3.784	76.433	76.0158	70.9954	83.5629	3.01566	5.35825	9.06475e-07
alv_po_l	77.1284	77.2026	66.4856	86.2368	3.76061	73.9012	73.8553	65.9462	81.2262	3.08546	8.57343	4.37262e-16	77.3013	77.5865	71.5824	84.6195	3.3222	73.6218	73.555	68.1853	79.3684	2.92659	5.2561	1.28273e-06
alv_po_r	78.3556	78.2654	68.2508	87.9657	3.62282	75.3707	75.5628	66.6737	83.9636	3.05964	8.13447	9.00333e-15	78.8763	78.7735	69.7861	86.5178	3.21959	75.0095	74.4679	70.4158	80.0568	2.49552	6.00364	6.76016e-08
alv_zma_l	54.026	54.0524	47.7686	63.8783	2.89986	51.4711	51.3003	43.4523	58.9717	2.85968	8.10666	1.01233e-14	54.3546	54.4233	49.5905	59.6367	2.65649	50.9609	51.0626	45.9677	56.2272	2.10936	6.32768	1.6987e-08
alv_zma_r	53.4916	53.3512	44.541	60.8786	3.15659	51.5559	51.5371	45.5585	60.7294	2.73338	5.99098	5.52604e-09	54.3212	53.8757	47.3953	60.9582	2.96616	51.5669	51.3367	47.2344	57.4712	2.12393	4.77488	9.42677e-06
alv_zo_l	55.348	55.5283	46.5975	63.6061	3.04216	52.2248	52.3375	44.7484	60.3865	2.67299	9.96653	1.33094e-20	55.6734	55.9131	49.4368	63.0283	3.03878	52.1586	51.8149	45.8084	60.8965	3.02433	5.18502	1.65775e-06
alv_zo_r	54.9308	55.1302	47.7022	61.4405	2.98507	51.8358	51.576	44.1981	58.7842	2.74124	9.86875	2.69283e-20	55.3488	55.5363	47.524	61.6159	2.64373	52.3621	52.3254	45.9485	59.7192	3.01853	4.70759	1.09221e-05
ast_l_al_l	148.187	148.295	134.437	162.687	5.76454	139.641	138.859	126.884	154.684	4.97315	14.5065	4.08988e-37	148.086	147.586	140.056	156.376	4.22095	139.207	140.228	125.081	149.831	5.20632	8.37881	2.30894e-12
ast_l_al_r	157.553	157.669	142.012	170.901	5.7119	149.181	148.818	135.23	162.977	4.82022	14.4769	5.9604e-37	157.394	157.32	149.297	166.213	4.56567	148.972	148.212	136.058	158.811	4.87359	7.97611	1.07367e-11
ast_l_alv	114.411	114.858	100.936	124.886	4.63704	108.432	108.548	96.2417	119.986	3.98181	12.6405	4.6787e-30	113.687	113.177	106.419	123.937	3.85196	108.119	107.42	100.737	117.996	3.94726	6.38511	1.13724e-08
ast_l_ast_r	118.517	118.482	105.413	134.543	4.91609	114.67	114.721	101.278	128.77	4.74431	7.27617	2.50157e-12	119.013	118.934	108.101	127.802	5.12453	115.415	114.543	107.217	127.744	4.50555	3.33463	0.00131759
ast_l_b	145.228	145.204	132.224	159.745	5.13623	138.591	138.51	125.575	149.76	4.93216	12.0436	5.90694e-28	145.019	145.127	132.337	160.637	5.64902	138.652	138.488	130.46	149.07	4.37245	5.63721	3.03123e-07
ast_l_ba	82.8396	82.698	73.5308	94.1759	3.64056	78.2749	78.5096	70.1143	87.903	3.35372	11.9173	1.79338e-27	82.1134	81.7811	76.5664	89.3847	3.2991	78.3229	78.5264	68.6036	86.069	3.4662	5.00982	3.32862e-06
ast_l_d_l	141.546	141.727	128.108	153.682	5.07924	133.488	133.512	121.555	147.181	4.62084	15.1656	9.16475e-40	141.077	141.252	131.453	151.451	4.44491	133.658	133.981	121.977	145.958	4.97686	7.03205	7.21851e-10
ast_l_d_r	151.393	151.267	137.253	164.846	5.28113	143.196	142.982	132.064	155.991	4.48413	15.2887	4.29498e-40	151.146	150.302	141.076	164.167	4.63485	143.296	143.724	132.008	156.459	5.38032	6.99183	8.93551e-10
ast_l_ec_l	122.756	122.823	111.065	133.635	5.02536	115.141	114.86	105.148	129.153	4.22837	14.9839	6.83441e-39	121.949	120.952	114.994	129.814	3.89751	114.81	114.451	105.011	123.915	4.20519	7.8738	1.707e-11
ast_l_ec_r	163.775	163.775	146.85	174.614	4.96335	155.844	155.67	145.725	166.558	4.1548	15.8337	3.64854e-42	163.64	163.351	153.53	178.552	4.86387	156.072	155.738	145.841	166.23	4.43458	7.27186	2.47896e-10
ast_l_en_ba	81.6793	81.527	72.7555	92.6827	3.59564	77.1901	77.2783	68.8968	86.9246	3.3106	11.8693	2.68562e-27	81.0534	80.9165	75.2759	87.9905	3.31056	77.3112	77.2627	67.8569	85.1608	3.35653	5.02032	3.18335e-06
ast_l_foram_l	61.7712	61.5334	53.2847	72.4023	3.52737	58.6974	58.9804	50.3334	67.2063	3.25516	8.27581	3.20048e-15	61.2708	61.1152	54.9512	67.1905	2.94334	58.9461	59.0436	51.4134	65.8435	3.67817	3.12107	0.00256505
ast_l_foram_r	87.1808	86.8027	79.2199	97.7327	3.55262	83.4957	83.6714	75.2431	92.0619	3.48292	9.5719	2.51399e-19	86.6286	86.4471	81.2835	93.0067	3.14392	84.0189	84.2707	76.6571	92.018	3.68252	3.40875	0.00104624
ast_l_ft_l	124.557	124.458	108.966	138.96	5.6155	117.113	116.833	107.783	128.316	4.30704	13.5922	2.37852e-33	123.889	124.193	114.244	134.896	4.66611	117.093	117.559	108.51	128.079	4.37927	6.71647	2.75489e-09
ast_l_ft_r	165.215	165.153	147.212	176.975	5.3158	157.492	157.424	148.712	168.01	4.0861	14.8862	3.17754e-38	164.968	164.691	155.212	179.059	5.20268	158.018	157.7	145.322	170.583	4.99914	6.09198	3.97567e-08
ast_l_ftm_l	124.726	124.602	112.702	135.512	4.88323	117.452	117.593	107.313	130.885	4.50018	14.1554	7.15083e-36	123.935	123.465	116.03	133.162	4.3652	116.918	116.688	107.41	125.504	4.10391	7.40627	1.34098e-10
ast_l_ftm_r	167.754	168.187	150.609	179.594	4.9422	159.646	159.468	150.434	170.134	4.16087	16.2192	1.10736e-43	167.351	166.184	156.151	182.399	5.31236	159.928	159.846	150.478	170.218	4.49489	6.74618	2.64105e-09
ast_l_l	86.0427	86.207	67.6667	102.41	5.87361	84.2254	83.9707	67.5652	96.7361	5.60603	2.89239	0.00407608	86.0255	84.3933	72.5877	103.3	6.78986	85.5066	84.7583	70.1193	101.015	6.31308	0.35403	0.724276
ast_l_ms_l	54.6207	54.403	43.9714	65.7139	4.31664	49.7882	49.705	39.0862	64.428	4.43403	10.0918	4.62336e-21	54.4522	54.6602	45.6871	63.7065	4.33526	50.7599	50.8355	36.3007	61.2203	5.3417	3.39439	0.00110307
ast_l_ms_r	127.193	127.618	114.863	138.421	4.2408	120.444	120.308	109.62	131.537	4.34362	14.3674	9.85589e-37	127.32	127.221	117.006	136.379	4.49478	121.394	120.744	112.693	132.377	3.98897	6.23618	2.23709e-08
ast_l_ns_l	153.364	153.431	139.961	168.81	5.94495	144.754	144.527	129.905	158.472	5.27278	14.002	3.1197e-35	153.249	152.414	141.62	165.64	4.97157	144.284	144.914	132.62	155.566	5.26361	7.83092	2.03619e-11
ast_l_ns_r	157.503	157.419	143.123	172.48	5.95164	148.918	148.816	134.635	163.285	5.12587	14.1242	1.20171e-35	157.179	156.377	146.181	168.448	4.81826	148.689	148.732	137.125	160.358	5.17174	7.59704	5.80266e-11
ast_l_o	68.7076	68.9173	60.6543	76.8481	3.39463	65.9641	65.6109	57.9593	76.4006	3.34109	7.44364	8.49315e-13	68.042	68.3219	60.9264	75.4435	3.59433	66.3622	66.1017	60.8445	75.2959	3.25314	2.19136	0.0314399
ast_l_orb_d_l	134.745	134.684	118.58	148.111	5.64814	126.848	126.603	114.542	142.918	4.55576	14.0622	2.95241e-35	134.466	134.277	127.047	142.683	3.93806	126.696	126.424	114.258	138.319	5.1568	7.57325	8.93304e-11
ast_l_orb_d_r	159.466	159.751	141.623	169.942	5.44961	151.46	151.305	140.246	161.674	4.35491	14.8313	3.75392e-38	159.325	159.157	150.837	172.071	4.84565	151.547	151.879	139.675	162.571	4.90094	7.1375	4.31019e-10
ast_l_orb_u_l	142.369	142.479	126.991	154.077	5.28384	133.936	133.393	123.995	146.738	4.40131	15.847	3.36324e-42	141.953	141.521	133.857	152.41	4.05591	133.475	133.497	124.891	144.002	4.54219	8.80598	2.83183e-13
ast_l_orb_u_r	165.9	165.955	149.518	178.268	5.35814	157.508	157.207	147.085	167.865	4.35783	15.7025	1.47425e-41	165.862	165.677	154.549	180.44	4.94127	157.528	157.245	146.997	169.712	4.82967	7.62806	4.93985e-11
ast_l_po_l	51.0353	50.8072	38.4623	61.1703	3.58619	47.1655	46.975	38.7572	63.0597	3.19429	10.413	4.00244e-22	50.4806	50.1995	44.2965	57.4427	2.94476	47.0573	46.6071	39.2131	54.622	3.78836	4.51224	2.38552e-05
ast_l_po_r	129.31	129.788	115.62	140.984	4.56651	124.017	123.854	114.232	135.897	4.37876	10.8116	1.54406e-23	129.44	130.378	118.193	140.686	5.20043	124.77	124.697	115.898	132.682	4.12111	4.45189	2.95239e-05
ast_l_zma_l	122.111	122.138	110.897	137.278	5.53752	115.19	115.203	102.996	129.648	4.66338	12.3548	5.64368e-29	121.986	121.028	113.529	133.552	4.8945	114.692	114.478	106.058	124.059	4.47092	6.95853	9.76513e-10
ast_l_zma_r	160.635	160.904	143.902	172.559	5.1888	153.052	153.193	138.296	163.987	4.36986	14.4465	7.88376e-37	160.893	160.372	152.166	174.476	4.70521	152.993	152.453	142.382	163.275	4.40831	7.74899	2.9462e-11
ast_l_zo_l	136.093	135.857	123.351	148.175	5.6572	128.285	127.948	117.257	142.892	4.66635	13.7599	3.60357e-34	135.419	134.619	126.821	143.309	3.94742	128.035	128.328	117.308	138.628	5.03612	7.29876	2.75257e-10
ast_l_zo_r	158.036	158.157	141.232	169.797	5.35572	150.515	150.659	139.404	162.118	4.68783	13.656	6.80969e-34	158.202	157.699	149.907	169.157	4.78888	151.032	150.657	136.313	162.494	5.38334	6.29334	1.75203e-08
ast_r_al_l	157.987	158.005	144.617	171.427	5.33618	149.822	149.711	138.927	169.654	4.99174	14.4403	5.50264e-37	158.355	158.074	145.135	169.321	5.15814	148.883	149.334	135.415	164.05	5.33748	8.07112	6.90156e-12
ast_r_al_r	148.485	148.397	132.688	161.98	5.52299	140.558	140.396	127.301	160.511	5.21109	13.4906	2.36609e-33	148.655	148.68	135.259	158.185	5.17623	139.587	140.259	126.427	153.071	5.18188	7.83005	2.00669e-11
ast_r_alv	114.814	114.809	102.179	126.508	4.48735	109.376	109.133	98.0463	121.422	4.19311	11.4415	9.23618e-26	114.868	114.545	104.808	124.037	4.14344	108.759	108.446	102.138	121.079	3.99714	6.71113	2.79139e-09
ast_r_b	145.761	145.332	133.206	160.65	5.11358	139.04	139.027	126.815	160.372	5.16548	11.9489	1.29155e-27	146.788	147.558	131.88	160.431	6.18478	138.867	139.053	127.576	146.67	4.25317	6.67372	5.12235e-09
ast_r_ba	83.4723	82.966	75.6953	97.3965	3.50248	79.4897	79.5798	72.1296	89.7961	3.48489	10.4165	3.58679e-22	83.7508	83.9976	76.3889	94.4468	3.77219	79.0136	78.9042	71.2415	85.1743	3.14923	6.09711	4.22843e-08
ast_r_d_l	152.029	152.607	136.14	163.113	4.94302	143.984	143.756	132.618	170.52	4.96444	14.8408	1.42375e-38	152.46	152.105	143.162	166.193	5.36193	143.736	143.613	132.986	161.348	5.1796	7.40136	1.35318e-10
ast_r_d_r	141.589	142.007	125.878	152.447	4.90257	134.275	133.974	124.486	160.854	4.86887	13.6793	4.31178e-34	141.583	141.344	132.789	151.91	4.95433	133.717	133.504	123.734	148.636	5.24315	6.89679	1.25327e-09
ast_r_ec_l	164.949	165.177	150.578	176.343	4.9998	156.929	156.763	147.184	182.13	4.75644	15.0182	3.03703e-39	165.498	165.618	156.044	178.641	5.12395	156.618	156.156	149.491	169.857	4.12431	8.53764	1.17479e-12
ast_r_ec_r	122.301	122.728	104.816	131.99	4.68541	115.373	115.309	103.546	137.765	4.65395	13.5564	1.26927e-33	121.709	122.04	114.446	133.078	4.87287	114.739	113.77	107.131	126.072	4.10314	6.92054	1.25221e-09
ast_r_en_ba	82.3241	81.9518	73.3262	95.9245	3.52079	78.4278	78.5333	71.1916	88.5565	3.43581	10.235	1.50646e-21	82.7244	82.6892	75.6657	93.2233	3.74698	78.0072	77.8428	70.5983	84.7412	3.08539	6.14647	3.48529e-08
ast_r_foram_l	87.7684	87.2488	80.1064	98.4231	3.65252	84.4111	84.5808	75.4381	93.0522	3.38396	8.71365	1.44966e-16	88.038	88.025	80.5842	97.5383	3.89343	84.3472	84.9152	74.492	91.3786	3.90503	4.23316	6.23721e-05
ast_r_foram_r	61.7856	61.5648	49.8868	71.1521	3.46765	59.163	59.1968	51.5282	67.911	3.20053	7.18197	4.59417e-12	61.7082	61.3175	54.5192	71.52	3.27707	59.0358	59.3201	49.8492	64.4619	3.47461	3.5388	0.000682041
ast_r_ft_l	165.981	165.595	149.101	181.527	5.51568	158.429	158.022	146.354	182.337	4.71885	13.4458	4.64476e-33	166.656	166.852	157.658	179.811	5.3684	158.262	158.362	149.941	173.494	4.47655	7.59455	6.75526e-11
ast_r_ft_r	124.055	123.629	103.297	138.089	5.31887	117.1	116.662	104.294	138.761	4.70786	12.653	3.83596e-30	123.85	124.084	114.618	138.876	5.23098	116.919	116.64	106.063	132.101	4.97968	6.06926	4.38628e-08
ast_r_ftm_l	168.592	168.737	153.409	181.185	5.04243	160.571	160.556	149.828	186.254	4.88225	14.7684	2.77301e-38	169.143	169.368	159.074	183.451	5.5783	160.029	159.986	151.624	172.923	4.11411	8.31628	4.03475e-12
ast_r_ftm_r	124.351	124.682	106.021	133.678	4.56304	117.544	117.516	105.778	137.931	4.74438	13.3644	6.95477e-33	123.624	123.362	114.769	135.657	5.41435	117.046	116.793	109.932	129.086	4.00039	6.18081	3.4676e-08
ast_r_l	86.8365	86.416	70.6204	104.622	5.91253	85.1262	85.355	69.7436	100.401	5.58182	2.7183	0.00690755	88.6831	89.3976	76.1454	103.515	6.10984	86.1482	86.0817	73.4257	100.546	5.25609	1.98914	0.0502712
ast_r_ms_l	127.7	127.821	114.575	139.51	4.44084	120.943	120.485	110.84	130.89	4.19529	14.2943	1.97401e-36	128.405	128.293	119.952	139.524	4.68231	121.724	121.964	112.479	132.332	4.3441	6.61587	4.28259e-09
ast_r_ms_r	54.2849	54.4853	41.0708	64.3494	4.20823	50.2054	49.9864	35.2242	64.104	4.58861	8.46734	8.40064e-16	53.4542	53.6581	43.6429	63.8091	4.85217	50.5357	51.0696	39.8937	63.3812	5.06424	2.63175	0.0102381
ast_r_ns_l	157.807	157.578	144.368	172.175	5.52698	149.662	149.21	137.184	166.227	5.09673	14.0002	2.81268e-35	157.913	157.405	141.503	167.143	5.14426	148.627	149.67	137.277	160.623	5.15952	8.06068	7.17939e-12
ast_r_ns_r	154.036	153.949	139.718	169.309	5.79471	145.721	145.641	131.462	162.792	5.44579	13.5129	1.96065e-33	154.126	154.097	137.826	164.618	5.35508	145.102	145.833	132.744	158.602	5.48311	7.44704	1.10216e-10
ast_r_o	69.4912	69.3584	60.6448	79.1638	3.55179	67.2823	67.3664	58.723	77.6169	3.41425	5.79387	1.59988e-08	70.0552	69.7228	64.2479	78.9459	3.08617	67.038	67.1254	58.0922	74.057	3.33074	4.20251	7.00045e-05
ast_r_orb_d_l	160.233	160.614	144.662	172.871	5.39895	152.452	152.296	141.081	175.041	4.83938	13.868	9.78223e-35	160.809	160.718	149.881	174.08	5.29968	152.125	151.994	141.29	167.826	5.04425	7.50718	8.52545e-11
ast_r_orb_d_r	135.159	135.676	119.18	147.058	5.40959	127.839	127.929	114.755	149.069	4.9056	12.9545	2.70577e-31	135.055	134.062	125.48	146.02	4.92626	127.301	127.495	117.751	139.277	4.8425	7.09939	5.09978e-10
ast_r_orb_u_l	166.567	166.921	149.06	177.987	5.26009	158.264	157.916	144.989	184.044	5.00725	14.7746	2.69075e-38	167.186	167.237	158.347	182.728	5.30816	157.616	157.326	148.813	173.295	4.57016	8.64121	6.30331e-13
ast_r_orb_u_r	142.55	142.917	121.502	155.256	5.23395	134.768	134.135	123.549	159.484	4.83903	14.1077	1.08104e-35	142.763	143.149	134.938	155.93	4.83849	134.087	133.292	125.727	148.401	4.48979	8.31296	2.41484e-12
ast_r_po_l	129.691	130.082	114.122	144.042	5.06572	124.565	124.17	114.951	135.948	4.57884	9.70126	9.85162e-20	130.58	130.351	121.154	143.267	5.80389	124.735	124.345	118.227	131.132	3.50707	5.45149	8.52554e-07
ast_r_po_r	50.0103	50.1056	37.3207	59.6727	3.22197	46.511	46.3545	33.8925	57.3723	3.71466	9.19642	4.54485e-18	49.6888	49.6551	40.663	57.584	3.21448	46.6711	46.1565	41.6068	53.0452	3.04156	4.31275	4.68464e-05
ast_r_zma_l	161.727	161.799	147.887	173.996	5.32575	154.091	153.611	140.784	173.094	4.95434	13.5673	1.24119e-33	162.545	161.984	152.592	172.734	5.12966	153.321	153.312	142.457	166.833	4.80135	8.30251	2.50984e-12
ast_r_zma_r	121.798	121.894	109.555	132.672	5.13522	115.444	115.454	100.82	131.701	5.15886	11.28	3.36435e-25	122.047	122.333	109.393	133.879	5.11362	114.598	114.306	104.888	124.693	4.33765	7.02655	7.8349e-10
ast_r_zo_l	159.29	159.484	144.018	171.533	5.31783	152.099	152.022	140.901	176.193	5.08402	12.63	4.04083e-30	160.229	159.803	150.419	173.854	5.58542	151.589	151.482	138.424	168.478	5.33365	7.07609	5.69369e-10
ast_r_zo_r	136.87	137.708	120.059	148.135	5.27919	129.617	129.338	116.63	149.847	5.01421	12.8728	5.0388e-31	137.102	136.777	127.757	147.899	5.13881	128.605	128.372	117.681	140.168	4.83164	7.61925	5.2258e-11
b_d_l	112.745	112.685	97.6106	127.353	4.70237	108.936	108.639	97.5249	129.777	5.08349	7.10685	7.37218e-12	112.753	111.524	104.575	124.724	4.66175	107.884	107.944	99.942	115.68	3.94743	5.04209	3.04494e-06
b_d_r	112.516	112.332	97.849	126.846	4.60348	109.075	108.659	97.7446	128.157	5.08537	6.4833	3.28776e-10	112.793	111.314	104.745	124.518	4.77197	108.087	108.198	97.5041	115.556	3.9718	4.79402	8.01255e-06
b_ec_l	122.69	122.781	107.237	135.926	4.76676	117.565	117.289	106.584	138.867	4.57409	10.0255	7.78504e-21	123.03	122.325	114.858	136.596	4.29024	117.01	117.322	107.71	126.243	4.31428	6.25723	1.96167e-08
b_ec_r	122.724	122.243	107.741	135.857	4.46041	117.609	117.061	107.789	133.073	4.47605	10.4612	2.517e-22	123.291	122.883	114.75	138.293	4.79136	117.19	117.009	109.914	124.365	3.69061	6.38027	1.42059e-08
b_l	118.467	118.773	99.0173	138.767	7.17998	113.042	113.294	96.5192	135.525	6.68222	7.14672	5.72758e-12	118.128	118.72	103.577	131.143	6.71805	112.797	112.011	97.8025	131.302	7.17857	3.42949	0.000970978
b_ms_l	162.584	162.92	148.974	183.141	5.73767	153.385	153.147	138.406	167.952	5.31072	15.206	6.01932e-40	163.21	163.496	148.538	174.13	6.31458	153.72	152.818	144.217	164.334	5.02883	7.4358	1.4733e-10
b_ms_r	162.912	163.361	150.669	181.661	5.32666	153.84	154.015	138.967	171.202	5.38231	15.4813	4.48467e-41	164.152	164.849	146.406	177.165	6.8827	154.117	153.429	146.209	162.992	4.60369	7.66407	8.86883e-11
b_orb_d_l	135.277	135.341	116.456	151.397	5.05887	130.133	129.608	118.439	153.166	4.87158	9.46477	5.67492e-19	135.659	135.243	127.399	147.668	4.40453	129.589	129.78	121.361	139.836	4.70858	5.95396	7.16462e-08
b_orb_d_r	135.023	134.915	113.272	150.406	5	130.128	129.824	119.602	149.493	4.7698	9.15276	5.84169e-18	135.737	135.876	127.566	148.542	4.84373	129.514	129.442	120.811	138.368	4.33699	6.05362	4.81007e-08
b_orb_u_l	110.27	110.658	86.2821	124.203	5.22545	105.079	105.297	91.8026	126.084	5.29341	9.01806	1.56182e-17	110.087	109.646	102.527	126.47	4.63945	104.314	104.714	94.364	112.517	4.2877	5.78001	1.48713e-07
b_orb_u_r	110.162	109.979	87.2405	124.358	5.13401	105.218	104.857	93.9109	123.926	5.08369	8.84278	5.60165e-17	110.368	109.081	101.815	126.437	4.89374	104.414	104.949	92.9543	113.424	4.15672	5.86504	1.09625e-07
b_po_l	135.19	135.197	124.664	149.171	4.40625	129.882	129.956	117.568	142.732	4.18425	11.2897	3.17571e-25	134.92	134.668	123.031	143.239	5.23723	129.37	128.239	121.654	138.865	4.11106	5.27155	1.29434e-06
b_po_r	135.791	135.825	126.377	146.348	4.00865	130.569	130.437	119.473	143.803	4.16715	11.6698	1.35431e-26	136.1	136.218	125.26	146.842	5.49595	129.797	129.524	120.914	138.776	3.92225	5.90367	1.13427e-07
ba_al_l	89.5217	89.1642	79.8848	101.116	4.61521	85.0079	84.9937	74.1615	99.0378	4.21056	9.33709	1.52404e-18	90.1663	90.055	74.0359	103.609	4.98115	85.0467	84.4467	76.8794	95.2026	4.86353	4.65098	1.32696e-05
ba_al_r	89.5437	89.347	78.9313	100.516	4.74389	85.2542	85.0956	74.6044	99.7985	4.21254	8.73757	1.25537e-16	90.1867	89.1705	74.3231	106.026	5.30257	85.4578	84.9725	77.4341	95.1272	4.33687	4.36598	3.99184e-05
ba_alv	42.3056	42.5395	34.8634	51.0332	3.3564	40.7328	40.3842	32.2761	50.0289	3.3387	4.29308	2.31567e-05	42.4796	41.5464	31.5942	56.1038	4.514	40.9602	40.7306	35.6089	52.2385	3.51554	1.67961	0.0972754
ba_b	141.219	141.262	126.13	155.621	5.62636	134.374	134.547	116.785	154.738	5.59249	11.1505	9.73269e-25	141.915	142.34	132.058	149.491	4.93095	134.585	134.537	122.661	146.902	5.45297	6.30538	1.64684e-08
ba_d_l	94.4013	94.6826	81.3848	105.736	4.679	88.7323	88.4265	77.0879	106.504	4.72373	11.0185	2.85668e-24	95.0278	94.5308	83.0271	110.089	4.95321	89.8546	90.0883	79.4365	99.9951	5.43758	4.44814	2.86371e-05
ba_d_r	94.2321	94.1589	81.8185	104.859	4.75607	88.7338	88.7097	77.3773	107.24	4.7369	10.5852	9.38148e-23	94.8185	94.7815	82.7076	108.281	5.11718	89.6213	89.5192	78.7601	100.738	5.88174	4.21616	6.74159e-05
ba_ec_l	95.9807	96.1348	84.7127	103.354	3.68787	90.8548	90.8867	82.9949	103.447	3.4922	13.0423	1.16788e-31	96.2272	96.0498	88.7055	104.345	3.46458	91.4603	90.815	84.6359	100.22	3.83292	5.83518	1.19361e-07
ba_ec_r	95.3469	95.3807	85.2053	103.431	3.78298	90.8167	90.8713	81.1195	99.5665	3.53094	11.3131	2.66237e-25	96.104	95.8643	86.8517	107.362	4.05196	91.3853	91.2769	83.5639	100.588	3.74208	5.4107	6.76775e-07
ba_en_ba	1.73504	1.70184	0.799971	3.64338	0.447548	1.63524	1.59978	0.662954	7.0258	0.608361	1.70764	0.0887206	1.56391	1.45831	0.78258	2.38231	0.401545	1.59995	1.58146	0.624639	3.28534	0.50225	-0.354454	0.724002
ba_foram_l	26.932	27.0968	21.6789	32.7658	2.05003	25.6002	25.4238	20.478	32.4671	2.07468	5.90043	8.94366e-09	26.9736	26.8722	21.9903	31.436	2.27858	25.6004	25.6465	20.563	29.9591	2.00989	2.85852	0.00547616
ba_foram_r	27.2401	27.4657	23.2762	33.0978	1.96445	26.0064	25.9072	20.8307	32.8246	1.90526	5.82571	1.34562e-08	27.5085	27.8727	22.6581	31.7792	2.07453	25.7975	25.9107	22.2992	30.2084	1.79177	3.94763	0.0001742
ba_ft_l	105.214	105.256	88.468	114.45	4.89643	99.561	99.1835	91.2496	117.923	4.23054	11.2898	3.67487e-25	105.906	105.532	92.4385	116.758	4.27685	100.674	100.063	92.8645	117.303	5.1536	4.94086	4.56122e-06
ba_ft_r	104.869	104.887	90.2074	115.011	4.74379	99.3243	98.8474	87.8606	117.751	4.32771	11.1578	9.77711e-25	105.713	105.212	98.063	119.089	4.04066	100.517	100.296	90.7228	117.619	5.43775	4.85065	6.89746e-06
ba_ftm_l	102.118	102.184	92.3007	110.332	3.89034	97.0237	97.1213	87.7373	113.972	3.75648	12.1743	1.94768e-28	102.306	102.043	94.3863	111.497	4.10387	97.3028	96.3655	90.3037	108.2	4.16181	5.41391	6.60231e-07
ba_ftm_r	101.848	102.037	92.4829	109.886	3.88663	97.0263	96.9337	86.502	112.189	3.82092	11.4319	9.64968e-26	102.25	102.188	93.756	115.026	4.34399	97.717	97.0879	89.5138	109.168	4.12638	4.7845	7.99016e-06
ba_l	116.409	116.921	99.9474	135.103	6.71174	112.004	112.197	94.8324	132.885	6.46824	6.10669	2.84562e-09	116.834	115.85	102.477	132.423	6.10636	112.598	113.208	96.5373	128.088	6.36986	3.03582	0.00326154
ba_ms_l	58.105	58.2782	48.7352	67.4695	2.82251	54.233	54.1095	48.21	62.119	2.62265	12.9866	1.94847e-31	57.9654	58.0745	51.1203	63.8665	3.11066	54.262	54.5687	49.4657	59.4387	2.62065	5.75847	1.7135e-07
ba_ms_r	58.6341	58.6595	50.616	65.541	2.8346	55.1109	54.9835	49.0591	63.1559	2.74375	11.541	3.93418e-26	59.6024	59.4895	53.0423	66.7846	2.99964	55.0826	54.6021	52.0089	60.4573	1.98558	7.94646	2.8247e-11
ba_ns_l	90.135	90.01	77.3724	103.476	4.7757	85.6622	85.4365	73.4783	99.7107	4.55806	8.75532	1.06123e-16	90.7652	90.3204	71.6087	105.753	5.95605	85.6157	84.0088	77.5766	95.9465	4.93432	4.21078	6.964e-05
ba_ns_r	90.4145	90.2025	77.597	104.188	4.91926	85.8125	85.7119	73.4913	99.451	4.62343	8.8093	7.23167e-17	90.931	90.115	72.3328	106.764	5.93955	86.1281	85.8824	78.2445	95.8056	4.77449	3.98609	0.000155138
ba_o	38.4455	38.3408	31.9634	44.9657	2.69697	37.0549	37.036	28.7335	43.7404	2.47145	4.91258	1.41851e-06	38.6548	38.783	32.766	43.9629	3.01435	36.7277	36.3059	33.0697	42.272	2.04298	3.34699	0.00132893
ba_orb_d_l	89.6337	89.7924	76.6421	99.3367	4.48744	84.9395	85.0755	72.4905	100.823	4.00781	10.0824	5.31475e-21	90.1886	89.512	77.2921	102.181	4.3658	85.6001	84.3992	76.4829	97.3055	4.90676	4.41847	3.21119e-05
ba_orb_d_r	89.5913	89.696	78.9279	99.2042	4.57051	85.0801	85.0451	74.0661	96.924	4.01075	9.58722	2.41729e-19	90.2106	89.4063	77.6332	104.995	4.73074	85.6972	84.9378	76.7506	98.0836	4.47782	4.3822	3.63212e-05
ba_orb_u_l	107.216	107.605	96.0842	115.766	4.39268	101.68	101.73	90.4318	119.092	3.93067	12.1368	2.99075e-28	107.951	108.258	98.183	120.78	4.42116	102.087	101.099	95.0768	116.019	4.80366	5.68112	2.24251e-07
ba_orb_u_r	107.146	107.489	95.8484	116.234	4.40475	101.864	101.752	90.194	116.749	3.96292	11.5199	5.10597e-26	108.154	108.509	97.9989	122.8	4.71765	102.506	101.715	94.8654	116.569	4.79143	5.31174	9.98009e-07
ba_po_l	63.076	63.2126	53.2339	73.1966	3.53914	60.1823	60.0887	53.6495	68.9361	2.92026	8.14964	8.28945e-15	63.4823	63.8577	57.0307	70.1036	3.51121	60.5774	60.9254	53.8939	67.1062	2.93719	4.01338	0.000139579
ba_po_r	63.9874	64.17	55.1918	74.3199	3.38156	61.383	61.5648	52.3399	68.8305	2.93571	7.5159	5.51777e-13	64.9719	64.6726	58.2556	71.4137	3.31337	61.6922	61.6368	56.3079	66.4267	2.38281	5.08241	2.91476e-06
ba_zma_l	82.6417	82.8105	71.5522	92.3697	3.9348	78.9979	79.1488	70.8794	90.4603	3.80579	8.60183	3.17502e-16	83.2466	83.2431	72.9213	90.9073	3.89006	78.9917	78.0894	73.2108	89.1035	3.84452	4.92019	4.71027e-06
ba_zma_r	82.1113	82.1327	72.8321	91.9655	4.00029	78.9967	79.1491	70.3969	88.7302	3.72985	7.35897	1.48088e-12	83.1817	82.5471	73.7096	96.0463	4.30755	79.1353	79.3999	73.0993	87.7087	3.11883	4.81225	8.12492e-06
ba_zo_l	89.4806	89.8384	77.2464	99.354	4.46892	85.0333	85.1345	73.0192	100.912	4.14272	9.43119	7.44711e-19	90.094	90.0872	77.6127	101.509	4.253	85.5108	84.1493	76.2185	96.8173	4.95421	4.43953	2.99947e-05
ba_zo_r	89.3161	89.4279	79.1872	98.9677	4.51271	84.9771	84.9461	74.6607	97.2146	4.03749	9.26022	2.74573e-18	90.1928	89.5878	78.4423	104.802	4.58847	85.6666	84.7817	76.7135	97.2859	4.43165	4.48746	2.45557e-05
d_l_d_r	25.2207	24.9938	18.8229	36.1471	2.89392	23.518	23.6668	17.6963	29.8332	2.39667	5.85585	1.17416e-08	25.8838	25.4785	19.6508	36.108	3.37424	23.6831	23.7346	18.306	30.1777	2.5991	3.26792	0.00165115
d_l_ec_l	40.24	40.172	35.3565	44.3771	1.77639	38.767	38.5985	32.6126	44.2829	1.94113	7.23446	3.30137e-12	40.8139	40.6338	35.9811	45.4118	1.91316	39.0925	38.7091	35.7288	42.5719	1.83361	4.10837	9.7696e-05
d_l_ec_r	64.4239	64.3235	56.6543	72.7122	2.99465	61.758	61.8563	55.368	71.4141	2.75158	8.47138	8.15711e-16	65.7352	65.7193	60.2383	77.3485	3.32736	61.9242	61.826	56.7091	69.9054	2.68633	5.63629	2.92528e-07
d_l_orb_d_l	29.9083	29.7937	25.7119	35.1048	2.05902	28.4921	28.6267	22.6597	33.9378	2.14169	6.16043	2.10111e-09	30.1881	29.9844	25.4511	35.712	2.49755	29.1272	29.3386	24.8029	35.059	2.30559	1.97397	0.0519484
d_l_orb_d_r	48.9726	48.9311	42.51	57.9834	2.66634	46.83	46.7159	38.9816	54.6143	2.73875	7.24366	3.07497e-12	49.8967	50.0051	44.0726	58.7886	3.12168	47.1137	46.9872	40.8591	55.0772	2.86195	4.15614	8.27813e-05
d_l_orb_u_l	21.9169	21.7822	17.7603	27.7344	1.83562	22.3179	22.1447	18.1864	28.6161	2.24935	-1.78484	0.0752361	22.1682	22.4468	16.8692	26.491	1.79708	21.871	21.7947	17.7166	27.6477	2.02386	0.694541	0.489435
d_l_orb_u_r	44.9802	44.9095	39.1262	54.7303	2.54839	43.6363	43.7003	38.1684	49.6337	2.4509	4.91173	1.42049e-06	45.6928	45.3365	40.7614	54.4491	2.75792	43.4793	43.4047	39.4187	50.2271	2.39396	3.83333	0.000257756
d_r_ec_r	40.1153	40.0222	34.8554	44.4144	1.88902	39.0018	38.9739	34.3936	43.2281	1.69772	5.6653	3.21085e-08	40.8052	40.8601	37.0835	45.0358	1.8284	39.0544	39.1457	35.619	43.2816	1.88962	4.21141	6.75268e-05
d_r_orb_d_r	29.4183	29.4147	24.7081	34.7526	2.00385	28.104	27.9101	22.7893	33.8685	2.20245	5.70436	2.60301e-08	29.7126	29.5929	23.6618	34.7244	2.64013	28.3689	28.0396	24.034	33.2779	2.30576	2.42444	0.0176887
d_r_orb_u_r	21.7464	21.9999	16.4168	25.8068	2.00592	22.2872	22.0747	17.4394	28.6529	2.39931	-2.23475	0.0261195	21.9476	21.8577	16.573	26.0914	2.30322	22.0159	21.8219	18.1372	28.0799	2.32026	-0.132134	0.895219
ec_l_d_r	64.5863	64.602	56.4671	73.8845	3.1211	61.5301	61.43	54.29	71.032	2.9387	9.21314	3.75738e-18	65.713	65.74	59.524	76.3649	3.45782	61.8907	62.0809	56.3193	70.0119	2.70308	5.50804	5.05656e-07
ec_l_ec_r	101.322	101.767	86.206	109.878	3.78334	97.4973	97.8009	88.045	109.103	3.6777	9.36734	1.17655e-18	102.921	103.115	94.8158	114.751	3.93559	97.7075	98.0182	91.4037	105.32	3.30581	6.41545	1.09628e-08
ec_l_orb_d_l	27.9892	28.0613	21.8991	31.3219	1.40372	27.0183	27.0525	23.2832	31.472	1.43504	6.2501	1.2593e-09	28.382	28.4802	26.1585	30.6738	1.22238	27.1706	26.991	24.1962	29.812	1.22186	4.43292	3.00317e-05
ec_l_orb_d_r	83.8419	84.2298	71.4208	91.2538	3.309	80.8907	81.1171	73.3822	90.2989	3.30886	8.14973	7.52378e-15	85.0254	85.3711	77.8213	94.0131	3.54042	81.0098	81.4122	75.006	89.0407	2.99538	5.47629	5.40698e-07
ec_l_orb_u_l	29.69	29.6515	24.5799	34.1358	1.57627	28.5038	28.4523	24.2444	32.2608	1.5956	6.83479	3.94409e-11	30.4153	30.1897	26.4587	34.1659	1.6843	28.4535	28.3802	25.4187	32.3853	1.56248	5.40057	7.04178e-07
ec_l_orb_u_r	84.626	84.936	72.8971	92.6596	3.30376	81.5628	81.7419	73.7633	91.4352	3.27241	8.51279	5.95669e-16	85.8632	86.3153	79.1976	95.6199	3.49717	81.7585	82.2455	75.3241	90.4671	3.05407	5.59122	3.32435e-07
ec_r_orb_d_r	28.1551	28.1736	20.3266	31.6138	1.50737	27.5613	27.4753	24.604	31.2088	1.34218	3.80213	0.000171068	28.8904	28.8534	26.3904	31.8564	1.23808	27.5371	27.5628	25.5175	29.3075	0.972434	5.43686	6.69994e-07
ec_r_orb_u_r	30.1304	30.2316	24.2193	36.2401	1.80711	28.931	28.7939	24.5341	32.5704	1.46815	6.65701	1.22255e-10	30.952	30.5755	27.6361	34.8004	1.62641	29.0695	28.9275	26.0763	32.8868	1.55328	5.29399	1.07554e-06
en_ba_al_l	90.976	90.5677	81.5459	102.355	4.56262	86.358	86.2565	75.2034	100.094	4.15627	9.66934	1.24717e-19	91.4912	90.9751	75.1892	104.603	4.88303	86.3485	85.9046	78.7225	96.4262	4.77712	4.76128	8.71122e-06
en_ba_al_r	90.9975	90.6335	80.7479	101.748	4.7045	86.6056	86.3633	75.8997	100.853	4.17017	9.02805	1.53248e-17	91.5133	90.4904	75.4607	107.001	5.2038	86.7562	86.2096	79.2814	96.3646	4.23472	4.48439	2.59012e-05
en_ba_alv	43.8884	44.1237	36.6416	52.7299	3.31216	42.2057	42.0039	33.4326	51.1716	3.27132	4.67103	4.35986e-06	43.9104	42.9808	32.7799	57.2063	4.39954	42.3764	42.1266	37.1902	54.4097	3.45823	1.73374	0.0871362
en_ba_b	140.781	140.744	125.518	155.267	5.6525	133.921	133.923	116.368	154.198	5.52946	11.2124	5.8808e-25	141.541	142.167	131.709	149.801	4.98618	134.122	134.224	121.742	147.074	5.5197	6.3076	1.63233e-08
en_ba_d_l	95.4024	95.6982	82.3109	106.122	4.60579	89.6687	89.4007	77.8426	107.092	4.63505	11.3396	2.06139e-25	95.95	95.6625	83.883	110.74	4.89544	90.7345	91.2486	80.2735	101.214	5.35978	4.54421	2.00153e-05
en_ba_d_r	95.2311	95.2537	82.7394	105.449	4.69382	89.675	89.8305	78.1432	107.836	4.6506	10.8664	9.80081e-24	95.7402	95.7354	83.5623	108.908	5.03639	90.5045	90.6863	79.5586	102.034	5.78259	4.31825	4.65926e-05
en_ba_ec_l	96.8353	96.973	85.423	104.614	3.65546	91.6351	91.7657	83.7268	103.942	3.44576	13.3774	6.3767e-33	97.013	96.8422	89.43	104.982	3.45656	92.2048	92.0359	85.3083	101.619	3.88792	5.84537	1.15403e-07
en_ba_ec_r	96.2043	96.2515	86.386	104.689	3.75058	91.6022	91.5108	81.8962	100.092	3.52383	11.5561	3.55586e-26	96.8874	96.8891	87.5348	107.96	4.02683	92.1284	92.1934	84.1932	101.711	3.75807	5.46453	5.42286e-07
en_ba_foram_l	25.8858	25.9931	20.5605	31.5386	1.99725	24.6666	24.6276	19.4245	31.6029	1.99767	5.57779	5.05729e-08	25.9994	25.7079	21.0358	30.5644	2.25914	24.7203	24.7759	19.9934	28.8382	2.00394	2.67888	0.00902982
en_ba_foram_r	26.1891	26.2685	22.1616	32.1954	1.94754	25.0788	24.8856	20.2111	31.9359	1.82968	5.36945	1.49073e-07	26.5407	26.9379	21.6562	31.0302	2.08419	24.9107	24.9466	20.5723	30.2025	1.91333	3.64377	0.000483978
en_ba_ft_l	105.816	105.666	89.3254	115.884	4.89463	100.114	99.8495	91.2047	118.191	4.19291	11.4348	1.14348e-25	106.459	105.942	92.9212	117.115	4.30096	101.191	100.652	93.8116	118.223	5.18642	4.94551	4.48145e-06
en_ba_ft_r	105.471	105.376	90.7894	115.994	4.75404	99.8883	99.412	88.5615	118.021	4.32148	11.2293	5.47888e-25	106.274	105.873	98.3419	119.425	4.09895	101.037	100.85	91.1595	118.537	5.46858	4.84588	6.9814e-06
en_ba_ftm_l	102.881	103.035	92.903	111.14	3.86801	97.714	98.0323	88.3096	114.361	3.73439	12.4192	2.42976e-29	103.012	103.065	95.1076	112.013	4.0827	97.9627	96.9758	90.8548	108.924	4.1955	5.45542	5.58333e-07
en_ba_ftm_r	102.609	102.754	93.1747	110.235	3.86525	97.7219	97.7213	87.1378	112.587	3.8022	11.6489	1.59458e-26	102.953	102.675	94.46	115.504	4.313	98.3736	97.918	90.1193	109.918	4.13522	4.8472	6.26723e-06
en_ba_l	114.846	115.397	98.2987	134.048	6.76024	110.513	110.589	93.452	131.057	6.51851	5.96283	6.34913e-09	115.427	114.653	101.152	131.416	6.22287	111.18	111.79	94.6666	124.808	6.26566	3.04187	0.00320203
en_ba_ms_l	57.9384	58.1418	48.8003	67.474	2.80911	54.0558	53.9312	47.9944	62.3043	2.60525	13.0961	7.57643e-32	57.799	57.9178	51.2639	63.6005	3.06173	54.1521	54.3627	49.4727	59.4901	2.60285	5.73965	1.83928e-07
en_ba_ms_r	58.4622	58.4864	50.635	65.1602	2.82317	54.9488	54.7413	48.8528	63.0504	2.72728	11.5665	3.18778e-26	59.4207	59.1323	52.9052	66.7534	2.97228	54.96	54.5557	51.9823	60.0268	1.93566	7.95378	2.90543e-11
en_ba_ns_l	91.6726	91.4037	79.331	104.799	4.71841	87.0981	87.0787	75.2608	100.831	4.49971	9.06678	1.10105e-17	92.1609	91.2435	72.7904	106.804	5.87203	86.9995	85.363	79.4146	97.2511	4.8254	4.29503	5.15612e-05
en_ba_ns_r	91.9506	91.8633	79.5291	105.499	4.86603	87.2497	87.1934	75.1536	100.572	4.56586	9.10397	8.43366e-18	92.3272	91.0448	73.5089	107.809	5.84952	87.5093	87.1611	79.8475	97.1153	4.6673	4.07181	0.000115307
en_ba_o	37.0298	36.9703	30.7452	43.8845	2.66619	35.7764	35.8584	28.0722	42.6522	2.3552	4.55307	7.46832e-06	37.3479	37.386	31.7838	42.8268	2.93932	35.4874	35.449	31.7615	40.8852	2.11514	3.24944	0.00176993
en_ba_orb_d_l	90.8481	90.9267	77.8208	100.196	4.43408	86.0707	86.2958	73.3477	101.611	3.9507	10.3958	4.5821e-22	91.3001	90.8306	78.2782	103.043	4.31497	86.6839	85.41	78.0944	98.3725	4.86711	4.48855	2.47971e-05
en_ba_orb_d_r	90.808	90.9202	80.3075	100.32	4.51861	86.2182	86.3399	74.938	97.7393	3.967	9.86456	2.92056e-20	91.3251	90.6479	78.6051	105.831	4.68421	86.7829	86.1105	78.2254	99.179	4.41433	4.46321	2.69371e-05
en_ba_orb_u_l	108.09	108.357	97.4378	116.538	4.326	102.467	102.582	91.1635	119.58	3.87495	12.5119	1.24069e-29	108.756	108.985	98.9745	121.355	4.33878	102.833	101.724	95.6844	116.838	4.81101	5.78241	1.4877e-07
en_ba_orb_u_r	108.019	108.517	97.1337	117.377	4.35721	102.658	102.581	90.9579	117.261	3.91993	11.822	4.15234e-27	108.961	109.224	98.7674	123.358	4.65686	103.253	102.501	95.6427	117.423	4.77981	5.41009	6.71177e-07
en_ba_po_l	62.8599	63.0747	52.8068	73.1464	3.54351	59.9679	59.8467	53.5272	68.6016	2.90461	8.1567	7.95006e-15	63.2825	63.7016	56.8465	69.6165	3.5351	60.3857	60.6794	53.7172	67.0814	2.93622	3.98674	0.000153423
en_ba_po_r	63.7542	63.8968	54.9664	74.2259	3.40424	61.1629	61.3874	52.2941	68.8254	2.93527	7.44989	8.50328e-13	64.7678	64.4517	58.0779	71.1453	3.32555	61.4927	61.5379	56.1855	66.1829	2.36988	5.07238	3.05388e-06
en_ba_zma_l	83.8868	84.0047	73.2338	93.8748	3.92918	80.1506	80.27	71.6856	91.3405	3.77407	8.86214	4.89465e-17	84.3764	84.7875	73.8492	91.8359	3.90481	80.1077	79.1289	74.5112	91.131	3.82234	4.94087	4.34722e-06
en_ba_zma_r	83.3596	83.2014	73.9457	93.842	4.00283	80.1529	80.4004	71.5223	90.094	3.736	7.56834	3.79879e-13	84.3176	83.8376	74.557	96.9123	4.28193	80.2448	80.3455	74.6116	89.6996	3.12117	4.86126	6.71749e-06
en_ba_zo_l	90.7085	91.107	78.4665	100.346	4.41795	86.1856	86.3817	73.8942	101.708	4.06564	9.73481	7.50573e-20	91.215	91.0093	78.6048	102.366	4.2289	86.6143	85.1149	77.8336	97.8984	4.90318	4.4938	2.45033e-05
en_ba_zo_r	90.5468	90.6516	80.5892	100.101	4.46424	86.135	86.1965	75.5697	98.0319	3.98332	9.52915	3.67924e-19	91.3225	90.8111	79.4302	105.637	4.54189	86.767	85.9658	77.8571	98.4012	4.36014	4.57615	1.76266e-05
eu_l_al_l	135.181	135.094	119.047	153.043	7.585	127.941	127.81	112.447	151.904	6.81387	9.17668	5.07918e-18	134.26	133.891	124.028	145.616	5.09315	128.425	128.538	113.204	143.973	6.14535	4.62305	1.53394e-05
eu_l_al_r	147.864	147.195	133.136	163.145	7.0753	140.701	140.539	125.58	162.982	6.49769	9.63612	1.59462e-19	147.063	146.497	136.67	156.062	4.86386	141.271	140.73	128.161	153.018	5.48185	4.99784	3.55039e-06
eu_l_alv	119.479	118.727	103.857	137.418	6.80534	113.622	113.199	101.856	132.695	6.02565	8.32771	2.28332e-15	118.429	119.195	106.228	132.746	5.89482	113.495	113.504	101.325	127.733	6.16634	3.65836	0.000459819
eu_l_ast_l	61.1544	61.1042	33.3068	79.7776	8.24734	56.6699	56.5947	35.6396	91.3881	7.35278	5.24504	2.80935e-07	62.1379	62.4311	41.2397	83.2395	9.45772	55.4863	55.1409	42.1731	70.6553	6.71731	3.62647	0.00053989
eu_l_ast_r	146.225	146.496	131.55	159.817	5.70034	140.399	140.425	125.762	168.794	5.61008	9.41486	8.21832e-19	147.412	147.662	132.734	162.568	6.66092	140.4	140.682	129.127	150.026	3.92039	5.73741	2.93736e-07
eu_l_b	105.534	105.148	86.3433	122.313	7.14056	102.38	102.354	85.173	120.36	5.93525	4.39028	1.53827e-05	104.673	104.434	88.2864	121.185	7.66237	102.938	102.668	92.2548	115.591	5.97879	1.1295	0.262352
eu_l_ba	104.707	104.424	89.2438	120.939	6.47703	99.0497	98.5484	84.7098	121.418	5.70108	8.47249	8.31875e-16	104.568	103.606	93.1018	115.575	6.58708	99.117	98.2377	87.2652	114.691	6.18285	3.8163	0.000270507
eu_l_d_l	116.005	115.964	101.139	133.484	6.5649	110.946	110.811	92.9773	129.684	6.44028	7.10914	7.19895e-12	114.397	113.143	105.655	128.598	5.387	111.671	111.486	99.9343	126.642	5.26851	2.28777	0.0248616
eu_l_d_r	130.798	130.737	116.964	144.592	6.08372	125.218	125.897	110.886	142.57	5.88887	8.51663	5.81449e-16	129.788	128.738	121.514	141.019	4.95854	125.917	126.128	114.301	136.704	5.03727	3.46305	0.000870334
eu_l_ec_l	93.1116	92.9102	79.2392	110.419	7.53992	88.112	88.2326	71.3753	107.666	6.88303	6.32855	8.08683e-10	91.2353	89.9267	83.6767	104.389	5.3511	88.6629	87.5429	74.2516	101.766	5.38831	2.14238	0.0352825
eu_l_ec_r	153.483	153.519	140.755	164.432	5.3362	147.163	147.364	133.729	159.889	5.28932	10.8692	9.58176e-24	153.01	152.875	144.422	164.56	4.6138	147.857	147.986	134.305	157.647	4.4933	5.06016	2.72319e-06
eu_l_en_ba	104.056	103.876	88.1683	120.08	6.41767	98.4161	97.7603	84.4215	120.172	5.6341	8.53528	5.35222e-16	104.007	103.318	92.5401	115.32	6.557	98.5023	97.8529	86.7133	114.33	6.16231	3.86936	0.000225575
eu_l_eu_r	148.236	148.201	134.177	164.146	6.45404	143.882	144.173	128.495	158.142	5.88976	6.43891	4.25782e-10	149.523	150.653	133.086	161.003	7.71285	144.571	144.7	126.993	153.389	5.29943	3.34712	0.00132392
eu_l_foram_l	97.1034	97.4676	78.67	114.81	7.23532	92.0654	91.317	77.7283	121.64	6.2766	6.7972	5.101e-11	97.4218	97.0524	79.5528	115.732	8.16487	91.9771	90.9686	81.0119	107.475	6.17169	3.36446	0.00122785
eu_l_foram_r	119.066	119.172	102.49	134.458	6.01184	113.542	113.237	97.895	140.487	5.78479	8.5562	4.39766e-16	119.268	119.121	107.043	135.292	6.56225	113.601	113.324	102.609	128.966	5.49934	4.18622	7.57759e-05
eu_l_ft_l	85.7464	85.4013	67.9018	101.09	7.13692	81.7526	81.9906	62.0475	101.251	6.71435	5.26718	2.50121e-07	83.3674	82.3378	74.1181	100.148	5.86081	82.4417	82.1663	70.7429	94.7253	4.93179	0.764363	0.447024
eu_l_ft_r	149.229	149.75	132.447	160.709	5.2075	143.869	143.82	130.198	156.252	4.95678	9.6342	1.58156e-19	148.393	148.616	139.099	163.229	5.31745	144.685	144.565	128.973	155.556	4.83636	3.26298	0.00164267
eu_l_ftm_l	90.7287	89.9664	76.7495	107.863	7.15147	86.1431	86.164	69.3562	106.423	7.0115	5.91681	8.17567e-09	88.8061	87.3441	80.2467	102.796	5.66924	86.7626	86.3327	74.4367	99.809	5.3905	1.65207	0.10255
eu_l_ftm_r	155.301	155.245	142.599	166.927	5.19024	148.843	149.23	135.635	162.559	5.12825	11.4384	9.12807e-26	154.626	154.424	144.961	168.327	4.94255	149.56	150.23	134.545	159.32	4.64198	4.7249	1.00565e-05
eu_l_l	102.493	102.258	87.3169	116.88	5.24731	98.9778	98.9348	87.1782	138.101	5.44805	6.00592	5.0004e-09	103.02	103.409	91.0155	111.936	4.88165	98.9201	98.9065	90.7009	107.643	4.59644	3.86759	0.000226918
eu_l_ms_l	84.4538	84.0138	62.2582	108.762	9.32827	77.8956	77.4626	59.5083	100.875	7.5665	7.05603	1.07476e-11	84.8877	85.2758	57.7257	104.718	9.96212	77.8488	77.54	63.7771	95.5564	7.85565	3.50902	0.000769291
eu_l_ms_r	154.135	154.717	139.061	169.119	5.99643	145.509	144.605	130.656	167.311	5.7548	13.4132	4.55199e-33	154.951	155.73	140.78	172.664	6.9724	145.975	146.263	136.154	157.429	4.94886	6.63977	5.52705e-09
eu_l_ns_l	143.847	143.928	126.299	161.766	7.73244	136.464	135.845	120.31	159.922	7.07131	9.10503	8.49721e-18	142.868	142.929	129.364	154.974	5.84133	136.809	135.647	119.956	153.717	6.66884	4.32228	4.58492e-05
eu_l_ns_r	149.152	148.382	134.077	165.527	7.52572	141.917	141.279	126.468	165.527	6.69179	9.28468	2.30293e-18	148.098	147.976	135.149	158.977	5.18576	142.375	142.023	127.892	156.017	5.96376	4.57924	1.7771e-05
eu_l_o	110.2	110.456	90.8199	125.762	6.61681	105.201	104.623	90.76	138.958	6.00409	7.2309	3.38634e-12	110.545	111.304	97.3643	127.005	7.54646	104.725	104.532	93.7856	119.196	5.29885	3.99182	0.000159667
eu_l_orb_d_l	114.61	114.282	99.0498	132.514	7.4452	108.991	108.244	92.5175	129.26	6.75144	7.22442	3.52932e-12	113.413	111.989	103.843	124.89	5.11135	109.578	108.645	94.609	124.415	6.08329	3.05261	0.00312835
eu_l_orb_d_r	149.178	149.121	136.771	160.427	6.05613	143.018	142.841	130.194	159.692	5.654	9.60753	1.9578e-19	148.574	147.943	139.079	159.723	4.73462	143.574	143.746	130.297	152.794	5.01478	4.58517	1.70699e-05
eu_l_orb_u_l	108.974	108.247	92.1061	128.369	7.21896	103.23	103.605	85.7744	125.291	6.73938	7.51564	5.36252e-13	107.137	105.8	99.3201	120.169	5.56498	103.809	103.015	91.1382	116.347	5.32769	2.73177	0.0077907
eu_l_orb_u_r	144.929	144.72	129.486	158.379	5.83466	138.778	139.045	123.9	154.566	5.63289	9.80093	4.39836e-20	144.035	143.524	134.992	157.393	4.91043	139.458	140.187	127.512	148.385	4.77933	4.22491	6.42975e-05
eu_l_po_l	56.1308	56.0252	39.0447	75.0961	7.54343	52.7514	52.4571	36.2729	77.6183	6.8816	4.27704	2.48486e-05	55.3115	53.3046	38.3347	72.5964	7.38191	51.9136	50.5739	41.1381	66.831	6.74832	2.14869	0.0347865
eu_l_po_r	144.852	144.65	127.198	158.564	5.83408	139.274	139.327	126.329	153.357	5.33195	9.12049	7.5864e-18	145.014	145.841	133.044	159.532	6.35936	139.346	138.229	126.303	151.473	4.57368	4.57675	1.9639e-05
eu_l_ra_l	54.1029	53.2267	36.33	73.1211	7.42982	52.2544	51.4273	33.2094	82.0889	7.26495	2.29882	0.0221361	53.3155	52.6914	39.6696	70.6767	7.00614	51.7155	52.1741	38.386	68.9377	6.63714	1.04857	0.297625
eu_l_ra_r	149.483	149.549	133.53	162.771	5.41956	143.19	143.126	130.457	158.76	5.23082	10.7967	1.73431e-23	149.67	149.942	138.995	162.928	5.87951	143.4	142.444	129.198	153.244	4.62182	5.30273	1.14265e-06
eu_l_zma_l	110.756	110.47	95.2157	132.13	8.00783	104.535	103.84	88.0007	127.809	6.81267	7.64688	2.36919e-13	109.887	109.435	99.8837	123.8	5.79253	104.897	104.002	90.2354	120.866	6.6086	3.59132	0.000578295
eu_l_zma_r	161.389	161.056	147.719	175.503	6.43078	154.059	154.229	142.353	171.086	5.70898	11.0162	3.22643e-24	161.235	160.783	151.79	176.23	5.5019	154.478	153.481	144.034	167.363	5.30709	5.59036	3.21917e-07
eu_l_zo_l	116.211	115.98	100.997	133.92	7.48868	110.804	109.998	94.0505	129.152	6.82431	6.89723	2.72291e-11	114.614	113.745	104.957	126.862	5.1737	111.379	109.831	97.4475	127.578	5.84334	2.6214	0.0105511
eu_l_zo_r	146.839	146.554	134.299	160.309	5.93692	141.425	141.452	125.59	161.983	6.15493	8.18128	6.07379e-15	146.494	145.642	137.999	159.777	4.83276	142.729	142.212	130.299	155.766	5.61773	3.21275	0.00192659
eu_l_zy_l	70.1303	69.6373	55.7229	91.1874	7.57967	66.2982	65.9333	52.0119	91.0528	6.9111	4.82789	2.11641e-06	69.0175	69.6144	56.2211	84.2891	6.20471	65.7407	63.2507	52.0168	83.9457	7.31109	2.1612	0.03383
eu_l_zy_r	158.38	158.4	143.727	171.145	5.33617	150.673	150.764	139.58	164.523	4.88588	13.7671	2.22979e-34	158.433	158.194	148.664	172.544	5.12483	151.123	151.387	138.005	163.05	4.79358	6.58868	4.79691e-09
eu_r_al_l	148.614	148.032	134.813	168.399	6.64952	141.729	141.379	128.234	161.823	5.91796	9.9958	1.04415e-20	149.073	149.243	136.515	161.313	5.35495	141.424	140.511	128.948	152.248	5.25528	6.44826	8.66404e-09
eu_r_al_r	135.746	135.142	117.624	157.056	7.46598	129.12	128.279	113.641	148.246	6.33638	8.744	1.25065e-16	135.983	136.069	122.504	146.212	5.60331	128.726	127.675	117.728	141.525	5.66231	5.76129	1.58464e-07
eu_r_alv	120.144	119.392	105.179	141.899	6.65565	114.823	114.664	103.477	136.637	5.57378	7.91992	3.89232e-14	120.812	121.199	107.405	133.575	6.28587	114.482	114.341	103.575	124.619	5.3988	4.83195	6.83689e-06
eu_r_ast_l	146.071	146.21	131.068	157.12	5.26706	140.696	139.932	126.799	157.074	4.9246	9.63318	1.60969e-19	147.549	148.071	132.761	161.698	6.44426	141.095	141.223	130.95	146.472	3.52111	5.55872	6.51185e-07
eu_r_ast_r	61.419	61.8264	35.6037	81.5114	8.92034	56.9896	56.8571	31.4862	104.61	7.92555	4.79698	2.4506e-06	63.029	63.1619	43.0454	84.7486	9.80162	55.8829	55.8801	40.5552	74.1048	6.58823	3.82689	0.000284057
eu_r_b	106.129	105.265	81.9853	123.952	6.81601	103.278	103.418	90.4516	116.358	5.64948	4.16208	4.05504e-05	106.696	107.027	92.2523	126.244	7.55712	103.527	103.751	89.274	115.174	6.17219	2.05379	0.0434812
eu_r_ba	105.435	104.849	88.1784	126.143	6.6041	100.415	99.7761	90.232	118.005	5.35089	7.63221	2.70672e-13	107.138	106.321	92.7421	121.172	7.32486	100.253	99.7186	91.6778	111.56	5.29698	4.81703	7.98691e-06
eu_r_d_l	131.643	131.083	121.171	149.669	5.76545	126.351	126.951	112.409	141.864	5.2795	8.74797	1.14033e-16	131.927	131.536	122.212	146.835	5.08702	126.512	126.31	118.971	134.774	4.26854	5.15698	1.94761e-06
eu_r_d_r	116.273	116.466	102.716	134.014	6.27172	112.107	112.228	93.6242	130.63	5.92219	6.24141	1.32744e-09	115.906	115.211	105.293	130.865	5.57402	112.057	111.78	103.188	124.742	4.65607	3.352	0.00125524
eu_r_ec_l	154.615	154.443	144.043	165.933	4.88916	148.501	148.693	137.261	162.354	4.79225	11.5413	3.90251e-26	155.538	155.237	144.653	168.486	5.01098	148.746	149.321	138.097	155.209	3.65892	6.92335	1.5863e-09
eu_r_ec_r	93.2198	92.241	75.1394	116.479	7.6887	88.5885	88.2091	71.5885	110.615	6.70243	5.86771	1.08622e-08	92.0745	90.791	81.5132	107.442	5.82281	88.6636	88.5581	75.5577	99.1122	5.0056	2.80942	0.00630159
eu_r_en_ba	104.785	104.064	87.4544	125.344	6.55648	99.7973	99.2133	89.8445	116.717	5.30051	7.64544	2.48629e-13	106.587	105.812	92.4067	120.58	7.27774	99.6472	99.0839	90.9068	111.051	5.27785	4.88184	6.23646e-06
eu_r_foram_l	119.732	119.496	103.84	139.856	5.8608	114.678	114.183	101.966	138.464	5.43199	8.1737	6.47737e-15	121.497	120.645	108.009	134.27	7.12091	114.599	113.969	104.803	125.887	5.12472	4.97262	4.43998e-06
eu_r_foram_r	97.2065	96.9255	78.3366	115.772	7.03353	92.5844	91.9231	79.7618	118.582	6.05647	6.43528	4.41855e-10	98.8195	98.4472	83.0576	117.042	8.46498	92.3192	91.7707	80.3444	104.447	5.66833	4.03548	0.000140372
eu_r_ft_l	149.792	149.69	135.886	160.201	4.61496	144.886	144.738	129.957	156.781	4.56993	9.76275	5.86118e-20	150.432	151.374	137.95	164.04	5.2256	145.048	145.498	133.082	149.437	3.48188	5.42316	8.4032e-07
eu_r_ft_r	85.6433	85.9552	64.4687	103.26	7.23412	82.1704	82.5191	58.5647	105.65	6.48177	4.62049	5.50883e-06	84.4207	83.8034	73.3143	106.715	6.3824	82.4576	82.4276	73.804	90.9504	4.5085	1.58888	0.116585
eu_r_ftm_l	156.095	156.169	145.874	167.203	4.70842	149.932	149.688	138.059	162.397	4.63193	12.0591	5.11192e-28	156.994	157.315	144.236	171.284	5.17353	150.104	150.504	139.508	156.337	3.60445	6.91158	1.8491e-09
eu_r_ftm_r	90.6963	90.228	70.5301	111.46	7.46645	86.4835	86.4293	69.0182	109.386	6.73833	5.41304	1.19764e-07	89.4411	87.9518	81.4966	108.506	6.10056	86.6488	86.5523	76.6726	96.4845	4.84024	2.2678	0.0262542
eu_r_l	103.089	103.005	90.601	116.795	5.30462	100.267	100.467	87.2316	135.919	5.33114	4.8483	1.91634e-06	105.257	105.805	92.7609	113.237	5.24811	100.318	100.771	89.8157	108.519	4.59012	4.4808	2.56113e-05
eu_r_ms_l	154.562	154.038	138.141	172.712	6.05349	146.227	146.232	132.335	165.97	5.54341	13.1227	6.17723e-32	156.452	157.083	144.089	170.572	7.31781	146.641	147.403	138.331	156.29	4.13202	7.38392	4.81736e-10
eu_r_ms_r	84.866	84.5123	61.3119	110.08	9.53149	78.5127	78.4105	63.9186	103.988	7.46388	6.78185	5.89928e-11	86.069	84.8984	60.2237	107.826	10.2803	78.1299	78.5913	62.8448	93.0762	7.56241	3.93441	0.000190854
eu_r_ns_l	149.926	149.423	133.409	169.726	7.11509	143.033	142.532	129.668	163.273	6.08789	9.51301	4.36894e-19	150.05	149.821	134.549	161.9	5.39734	142.569	142.948	128.367	156.149	5.75481	5.99726	5.96815e-08
eu_r_ns_r	144.726	144.097	128.811	164.637	7.59555	137.74	137.162	122.354	158.447	6.71124	8.90667	3.72106e-17	144.888	145.495	129.078	155.007	5.73814	137.682	137.199	124.861	150.225	6.39536	5.30445	1.04912e-06
eu_r_o	110.908	111.21	92.1875	131.56	6.7858	106.513	106.201	92.9898	137.193	6.00046	6.26977	1.14231e-09	112.988	113.056	98.4783	127.869	8.00513	105.833	105.935	94.5998	115.45	4.67832	4.88057	7.57655e-06
eu_r_orb_d_l	150.318	150.029	140.046	167.254	5.78311	144.44	144.41	133.558	161.523	5.18489	9.77994	5.44786e-20	151.086	150.432	141.344	164.384	5.0891	144.627	144.512	135.823	152.221	4.33138	6.11217	3.90093e-08
eu_r_orb_d_r	115.342	114.731	97.2985	137.826	7.52282	110.246	109.961	94.8888	132.241	6.49325	6.62729	1.42146e-10	115.15	113.375	104.022	129.833	5.66223	110.238	109.217	97.3107	122.407	5.28067	4.01206	0.000137567
eu_r_orb_u_l	145.793	145.705	133.823	161.561	5.51649	139.928	140.514	126.543	152.222	5.14787	10.0447	6.81755e-21	146.188	145.853	136.126	160.264	4.91739	140.044	140.526	130.887	145.594	3.92861	6.17361	3.21679e-08
eu_r_orb_u_r	109.42	108.54	92.6729	130.074	7.33403	104.338	104.558	84.9441	123.724	6.42538	6.73575	7.37395e-11	108.828	107.936	100.713	125.527	5.89665	104.409	104.371	93.1211	114.755	4.92698	3.63649	0.000502132
eu_r_po_l	144.849	144.443	126.791	160.919	6.16122	139.754	139.832	128.365	154.892	5.20851	8.16013	7.54408e-15	146.426	145.383	131.962	161.5	7.0441	139.731	139.314	126.751	147.067	3.64708	5.33869	1.59647e-06
eu_r_po_r	56.1734	55.4007	39.2204	78.5833	7.85174	53.0468	52.2335	38.6566	74.456	6.63224	3.93125	0.000103428	56.4034	55.4456	38.1644	73.7556	8.11192	51.8875	51.2101	41.5412	64.3621	6.35665	2.77133	0.00706111
eu_r_ra_l	149.769	149.517	135.055	164.464	5.51314	144.125	143.963	131.629	159.153	5.12965	9.68463	1.09169e-19	151.222	150.768	139.12	165.094	6.50139	143.956	143.583	131.369	149.864	3.51218	6.21931	5.27714e-08
eu_r_ra_r	54.8029	53.9343	37.5988	75.5741	7.5568	53.1358	52.3218	38.7846	85.676	7.04726	2.08488	0.0378475	55.4255	54.1691	39.6391	72.5875	7.3826	52.3293	52.6298	39.18	64.2947	6.13743	2.03973	0.0448767
eu_r_zma_l	162.525	161.684	149.671	178.528	6.11887	155.229	154.945	140.803	176.366	5.41852	11.5362	4.59897e-26	163.755	162.742	153.75	174.425	5.91838	154.961	154.934	146.193	165.212	4.75972	7.32321	2.35463e-10
eu_r_zma_r	111.053	110.184	94.768	136.883	8.11729	105.113	104.235	86.4862	126.723	6.83584	7.23415	3.43293e-12	111.382	111.271	94.7475	126.837	6.5405	104.912	104.14	92.9269	118.484	5.88692	4.65015	1.34769e-05
eu_r_zo_l	148.777	148.503	136.226	167.258	5.87904	143.746	143.443	131.1	162.773	5.50319	8.07268	1.29176e-14	150.159	150.879	140.084	166.047	5.81627	143.767	144.315	135.021	153.395	4.77932	5.37001	8.45651e-07
eu_r_zo_r	117.305	116.584	101.156	138.873	7.4474	112.429	112.288	96.5175	130.304	6.47936	6.3843	5.92604e-10	117.468	116.171	106.525	132.099	5.62276	111.927	111.643	99.852	127.494	5.60576	4.41392	3.22172e-05
eu_r_zy_l	159.07	158.937	146.054	172.672	5.39819	151.881	151.528	142.076	170.606	4.81949	12.8373	7.7223e-31	160.536	159.362	151.711	171.307	5.8619	151.707	151.706	141.079	160.315	3.93957	7.90583	3.17374e-11
eu_r_zy_r	70.0429	69.5433	55.3239	96.3903	8.01284	66.8165	66.2731	55.4577	96.5282	6.57973	4.02133	7.22454e-05	69.8627	70.0168	54.2797	84.6007	6.76517	66.1495	65.1949	54.0041	78.5932	6.39592	2.52251	0.0136943
foram_l_al_l	110.045	109.815	97.8722	123.107	5.26001	104.284	104.185	89.8794	119.156	4.73432	10.5217	1.66911e-22	110.948	110.485	97.999	121.286	5.28558	104.4	103.919	94.2642	116.453	5.34668	5.50816	4.49735e-07
foram_l_al_r	113.564	113.42	101.206	125.834	5.24947	107.947	107.578	92.4727	123.575	4.59243	10.4068	4.31732e-22	114.385	113.416	101.488	125.301	5.21461	108.216	107.934	99.3443	120.604	4.90848	5.44797	5.78804e-07
foram_l_alv	65.1601	65.1741	56.2573	76.008	3.89222	62.1391	61.6019	52.4888	73.1693	3.77485	7.20027	4.05303e-12	65.5826	65.1567	57.3729	75.3331	4.58894	62.421	62.5681	54.8001	72.1017	3.83049	3.34514	0.00128269
foram_l_b	150.968	151.192	135.948	164.311	5.22366	144.375	144.543	130.523	165.847	5.1759	11.5863	2.67934e-26	151.557	151.15	140.462	159.27	4.7127	144.653	144.216	135.512	157.18	5.49129	6.03418	5.37365e-08
foram_l_d_l	114.303	114.395	101.21	129.426	4.86841	107.821	107.798	95.6183	127.919	4.92901	12.0922	3.86034e-28	115.005	114.567	105.003	125.45	5.25178	108.955	110.033	95.3002	120.258	5.99843	4.79974	7.68302e-06
foram_l_d_r	117.579	117.556	104.975	131.599	4.84068	111.111	111.033	97.9432	130.702	4.89623	12.1403	2.56892e-28	118.252	118.47	109.554	129.929	5.55145	111.998	112.185	98.4462	124.661	6.36845	4.6819	1.20589e-05
foram_l_ec_l	107.897	107.979	95.8049	117.421	4.14535	102.106	101.982	89.9367	120.964	4.05348	12.9082	3.61589e-31	108.226	107.641	100.552	117.923	4.2195	102.751	102.637	95.4014	111.056	3.96029	5.98409	6.30615e-08
foram_l_ec_r	121.392	121.61	108.678	130.554	3.99589	115.719	115.524	105.518	130.905	3.91557	13.104	6.61914e-32	122.115	122.147	113.455	133.061	4.13414	116.288	116.22	107.235	128.143	4.31141	6.16984	2.85976e-08
foram_l_foram_r	32.4266	32.0585	26.6036	39.9222	2.42763	31.2387	31.1421	25.1026	36.9829	2.36025	4.5338	8.1014e-06	32.4264	32.1012	27.9724	37.5355	2.55802	31.2987	31.1173	24.3267	38.4919	2.6766	1.92642	0.0577022
foram_l_ft_l	116.679	116.373	99.3635	128.239	5.32364	110.513	110.372	100.728	128.577	4.50273	11.4281	1.24848e-25	117.374	117.347	104.553	128.181	4.7373	111.635	111.651	100.439	127.942	5.4892	5.00573	3.47979e-06
foram_l_ft_r	129.421	129.285	112.813	141.841	4.99301	123.082	123.039	112.144	140.145	4.51711	12.1648	2.30711e-28	130.149	129.386	118.008	138.75	4.22202	124.232	123.587	111.599	140.353	6.0031	5.09906	2.78871e-06
foram_l_ftm_l	113.492	113.74	102.305	122.265	4.28785	107.898	107.993	96.5243	126.488	4.25748	11.9639	1.13821e-27	113.757	112.688	104.99	125.505	5.01615	108.208	107.346	99.4362	119.656	4.49108	5.21273	1.51513e-06
foram_l_ftm_r	127.497	127.413	116.213	137.066	4.10997	121.594	121.496	110.774	136.184	4.0443	13.2302	2.20343e-32	127.855	127.634	118.698	139.729	4.56021	122.282	121.736	111.792	136.336	4.88673	5.27337	1.17387e-06
foram_l_l	107.469	107.608	90.7852	121.16	6.41117	104.265	104.014	88.7368	120.574	6.16578	4.65472	4.69885e-06	107.758	107.617	97.1137	119.987	5.56894	105.059	105.398	87.5722	121.811	6.283	2.03333	0.0454705
foram_l_ms_l	41.6443	41.7338	32.31	49.4889	2.70461	38.377	38.365	32.1189	43.6931	2.50547	11.4525	8.52176e-26	41.8298	41.7316	36.8751	51.5584	2.97888	39.154	38.715	34.1204	46.2927	2.59922	4.28071	5.33713e-05
foram_l_ms_r	73.1935	73.1174	64.6523	81.0481	3.02346	69.1344	69.2326	61.5066	77.6815	3.09546	12.1228	2.99141e-28	73.8292	74.4782	67.8888	77.8561	2.60764	69.5873	69.1747	64.9078	75.0578	2.64641	7.22109	2.98464e-10
foram_l_ns_l	111.481	111.454	99.0536	126.296	5.31497	105.636	105.771	89.4551	121.154	5.22478	10.1333	3.33636e-21	112.402	111.732	96.0627	123.674	6.08601	105.702	105.874	95.8999	118.393	5.50254	5.16482	1.8269e-06
foram_l_ns_r	113.252	113.058	100.495	128.807	5.39318	107.293	107.475	91.4206	122.396	5.05549	10.4167	3.67531e-22	113.991	112.889	98.2053	125.549	5.97239	107.647	107.138	99.2919	120.198	5.24591	5.04676	2.94207e-06
foram_l_orb_d_l	106.51	106.696	93.392	118.054	4.94794	100.756	100.596	86.0198	116.821	4.6022	11.0031	3.36287e-24	107.281	106.508	97.7546	117.656	4.85096	101.483	101.43	90.0467	114.837	5.42392	5.0398	3.00386e-06
foram_l_orb_d_r	115.44	115.486	102.567	127.718	4.77772	109.645	109.451	95.9139	123.259	4.4342	11.4876	6.36218e-26	116.151	114.706	106.333	126.936	4.81946	110.281	111.057	100.47	125.226	5.08508	5.29837	1.05817e-06
foram_l_orb_u_l	123.803	124.231	110.88	133.89	4.52157	117.456	117.381	105.512	136.489	4.27419	13.1807	3.52213e-32	124.627	124.573	115.051	136.119	5.02817	117.88	117.829	108.393	132.687	5.23474	5.87951	9.7168e-08
foram_l_orb_u_r	131.498	131.855	117.904	141.636	4.45984	125.218	125.244	113.567	142.242	4.21739	13.2211	2.47663e-32	132.513	132.392	121.39	144.201	4.92307	125.835	125.296	116.206	141.838	5.39883	5.78051	1.49201e-07
foram_l_po_l	54.276	54.3802	42.0799	66.2581	3.5903	51.6827	51.5855	45.2844	61.5159	2.99215	7.17062	5.15982e-12	55.0939	55.0574	47.962	62.0569	4.01043	52.5118	52.9692	45.665	59.0288	2.75947	3.35475	0.00129251
foram_l_po_r	82.797	82.8508	74.7274	92.1713	3.4364	79.4225	79.3064	71.7737	88.7426	3.59329	8.77061	9.49979e-17	83.6645	83.8493	76.0506	88.8208	2.99723	80.1152	80.4489	73.2012	88.1164	3.26549	5.06435	2.70623e-06
foram_l_zma_l	94.3439	94.2545	81.0322	106.51	4.63276	89.9505	90.0112	77.8621	102.581	4.39459	8.89125	3.979e-17	95.2419	94.862	87.3203	104.684	4.30229	90.0851	89.4684	81.2139	98.5163	4.27046	5.38034	7.56294e-07
foram_l_zma_r	108.579	108.024	97.5632	119.035	4.51224	104.02	104.108	91.5847	115.424	4.09592	9.66852	1.25898e-19	109.681	109.349	101.392	119.754	4.25335	104.214	104.097	96.1614	113.283	3.98708	5.93041	7.90257e-08
foram_l_zo_l	106.959	106.846	93.9786	120.037	5.00672	101.321	101.616	86.8711	117.364	4.66581	10.6466	5.93185e-23	107.557	106.886	98.5645	117.773	4.77997	101.866	101.463	89.3287	114.783	5.45961	4.96027	4.13095e-06
foram_l_zo_r	114.871	115.014	101.058	127.64	4.71026	109.296	108.962	95.3091	122.978	4.4948	11.0639	2.00435e-24	115.868	114.547	107.03	126.16	4.73505	110.075	111.239	101.38	124.126	4.9434	5.35242	8.49509e-07
foram_r_al_l	113.739	113.005	100.958	125.96	5.01808	107.955	107.572	95.6083	122.068	4.51712	11.0703	2.03364e-24	114.593	114.038	100.459	123.898	5.27703	107.746	107.259	99.5297	120.552	5.27456	5.80393	1.32674e-07
foram_r_al_r	110.184	109.944	97.0872	122.699	5.28566	104.642	104.381	90.5016	119.906	4.59544	10.2256	1.80741e-21	110.99	110.568	97.2532	121.999	5.56599	104.54	104.021	95.8966	116.748	4.90634	5.49805	4.83656e-07
foram_r_alv	65.3707	65.7924	55.813	75.5127	3.82191	62.405	62.1378	53.7589	72.3419	3.60988	7.29006	2.29717e-12	65.8775	65.299	57.2198	75.5202	4.65368	62.4991	62.3096	55.6841	71.993	3.81148	3.5521	0.000664339
foram_r_b	150.685	150.956	135.634	164.295	5.23659	144.089	143.992	130.467	164.6	5.32849	11.4094	1.16173e-25	151.274	151.468	139.384	159.563	4.7927	144.277	143.648	135.288	156.089	5.37874	6.14337	3.30465e-08
foram_r_d_l	117.801	117.83	105.088	133.234	4.77923	111.211	111.534	99.0419	131.357	4.84674	12.511	1.09693e-29	118.518	118.429	108.86	129.731	5.30138	112.077	112.821	99.5669	124.889	6.04192	5.06849	2.70252e-06
foram_r_d_r	114.059	114.241	101.137	128.671	4.96356	107.819	107.749	95.975	127.4	4.91287	11.5481	3.68059e-26	114.628	114.769	105.396	125.127	5.59881	108.425	108.201	94.6598	121.585	6.31424	4.64856	1.36115e-05
foram_r_ec_l	122.201	122.274	108.97	131.593	3.98469	116.077	116.313	105.386	135.805	3.96031	14.0852	1.19836e-35	122.637	121.901	114.504	132.92	4.06051	116.497	115.954	109.121	126.11	4.17436	6.66793	3.36027e-09
foram_r_ec_r	107.061	107.138	94.1751	116.927	4.17927	101.748	101.608	91.8675	116.203	3.92049	11.9813	1.02189e-27	107.563	106.941	98.2391	118.407	4.51896	102.122	101.895	95.2143	113.675	4.0805	5.65246	2.54309e-07
foram_r_ft_l	129.837	129.943	113.699	141.254	5.10961	123.5	123.474	114.601	142.73	4.34861	12.2071	1.89234e-28	130.555	130.758	117.17	141.376	4.73786	124.394	123.205	116.236	139.626	5.48312	5.37699	7.97373e-07
foram_r_ft_r	115.95	116.283	99.7495	128.306	5.04495	109.853	110.052	99.3269	128.115	4.57209	11.5716	3.28688e-26	116.605	116.584	106.301	125.235	4.05991	110.885	109.84	100.728	127.083	5.66814	5.18888	1.93736e-06
foram_r_ftm_l	127.92	127.879	116.086	137.137	4.15641	121.868	121.937	111.753	141.303	4.13338	13.3427	8.23434e-33	128.283	127.03	119.482	140.44	4.80678	121.978	120.818	113.723	134.262	4.62657	5.9771	6.45112e-08
foram_r_ftm_r	112.923	112.936	102.048	122.669	4.24418	107.487	107.603	97.5658	122.801	4.08762	11.9227	1.63077e-27	113.089	112.679	102.644	125.11	4.91668	108.01	107.252	99.9667	121.467	4.59816	4.77184	8.4083e-06
foram_r_l	107.144	107.331	89.8389	120.94	6.41474	104.009	104.246	88.4713	121.224	6.36212	4.48313	1.0143e-05	107.528	107.34	96.7554	120.866	5.64852	104.981	105.507	89.8489	119.7	5.89159	1.97353	0.0519837
foram_r_ms_l	73.267	73.45	64.3424	79.7487	2.96914	68.9628	68.6998	61.7557	75.5389	2.75796	13.7256	3.10583e-34	73.4501	73.7556	68.8634	79.5884	2.99013	69.5414	69.7161	62.0053	76.1175	3.0279	5.80921	1.29836e-07
foram_r_ms_r	41.6273	41.9481	32.7239	48.3211	2.59854	38.6484	38.5601	31.3085	47.8986	2.63648	10.3993	4.11685e-22	42.2054	42.3092	37.4632	47.6793	2.35605	39.1105	39.3113	34.6069	44.272	1.96475	6.38042	1.28204e-08
foram_r_ns_l	113.222	113.362	100.639	127.727	5.11397	107.415	107.712	93.6653	122.033	4.94482	10.5494	1.25687e-22	114.054	113.34	96.824	124.293	6.01832	107.125	106.695	99.133	120.311	5.35293	5.44059	6.08088e-07
foram_r_ns_r	111.992	112.022	98.2835	126.69	5.34151	106.006	106.15	91.5141	120.578	5.14263	10.4324	3.18957e-22	112.726	111.651	96.0231	124.079	6.259	106.11	105.784	98.4974	118.399	5.39275	5.0649	2.76197e-06
foram_r_orb_d_l	115.725	115.682	102.819	127.318	4.64305	109.844	109.911	96.9827	125.885	4.34679	11.9478	1.3575e-27	116.489	115.851	105.528	127.778	4.84555	110.3	109.428	100.783	123.956	5.28379	5.45926	5.57005e-07
foram_r_orb_d_r	106.559	107.024	92.7591	119.535	5.01616	100.942	100.861	88.0667	114.154	4.53825	10.7307	3.12834e-23	107.177	106.043	97.4069	117.992	5.12746	101.365	102.024	91.7629	116.438	5.04598	5.11005	2.23418e-06
foram_r_orb_u_l	131.657	131.746	117.529	142.176	4.434	125.196	125.216	115.186	144.606	4.22101	13.6391	6.35039e-34	132.49	132.919	122.304	144.887	4.98715	125.396	125.243	116.933	140.64	5.26471	6.18672	2.67088e-08
foram_r_orb_u_r	123.619	123.668	109.758	133.832	4.62006	117.519	117.545	107.491	134.268	4.24991	12.5573	7.9574e-30	124.558	124.638	112.846	136.316	5.23952	117.929	117.656	109.113	134.027	5.30477	5.62329	2.80453e-07
foram_r_po_l	82.4678	82.5699	70.3018	92.3668	3.7662	79.048	78.8083	71.8619	89.043	3.52815	8.56375	4.2048e-16	83.113	83.2825	76.1002	90.0461	3.535	79.6188	79.705	73.2037	88.4931	3.21514	4.62483	1.47944e-05
foram_r_po_r	54.1873	54.4817	45.186	62.8698	3.35068	51.6696	51.4014	44.786	62.7398	2.99428	7.24048	3.204e-12	55.1171	55.2366	47.9397	61.94	3.38433	52.5275	52.9727	47.2961	58.2264	2.4714	3.90828	0.000209202
foram_r_zma_l	109.458	109.065	98.4293	119.998	4.31017	104.504	104.611	93.7174	117.644	4.17724	10.6665	4.92579e-23	110.355	109.742	100.59	119.061	4.14572	104.318	103.356	98.3265	113.76	4.31147	6.38364	1.14784e-08
foram_r_zma_r	93.7565	93.865	81.8975	105.545	4.67304	89.7012	89.3045	79.0082	100.23	4.27826	8.27161	3.3076e-15	94.9177	94.4315	86.0346	104.637	4.49118	89.6333	89.7126	80.5084	97.9701	3.74699	5.71405	2.07225e-07
foram_r_zo_l	115.351	115.376	101.632	127.3	4.63103	109.764	109.636	96.615	126.572	4.51545	11.1627	8.84652e-25	116.252	115.233	105.766	127.646	4.74729	110.039	109.588	100.661	123.359	5.36766	5.48363	5.12004e-07
foram_r_zo_r	107.12	106.998	92.8803	121.746	4.97439	101.571	101.467	88.6307	114.839	4.54339	10.6456	6.10905e-23	108.016	106.986	98.5244	118.228	5.18479	101.796	102.04	91.0601	116.352	5.16593	5.3754	7.715e-07
ft_l_b	104.335	104.646	89.8614	121.515	4.82363	101.244	100.796	84.9344	117.887	4.96235	5.77268	1.79287e-08	103.907	103.938	94.5362	114.666	4.37732	100.008	100.687	88.1915	108.468	5.15968	3.64419	0.000488239
ft_l_d_l	43.4611	43.2296	37.7924	51.1834	2.37431	42.1515	41.9595	36.8048	50.2971	2.17626	5.2549	2.66584e-07	44.0314	43.9617	38.4479	49.1105	2.70255	42.3768	42.2149	38.407	48.4541	2.09869	3.05824	0.00310494
ft_l_d_r	66.4217	66.2449	57.3511	74.9371	3.18363	63.8019	63.6104	56.1368	74.7835	3.00492	7.73359	1.27104e-13	67.6161	67.2645	61.5269	77.6508	3.46098	64.1174	64.0407	59.241	73.5961	2.73017	5.01959	3.46219e-06
ft_l_ec_l	22.4297	22.3565	13.9807	29.6964	3.14226	20.1846	19.9938	14.0086	28.4013	2.92114	6.76259	6.16621e-11	23.2309	23.2304	18.0584	31.4381	2.86384	21.1016	21.0742	12.4263	32.2014	3.85682	2.80343	0.00649405
ft_l_ec_r	103.409	104.03	90.9096	110.971	3.81206	99.706	99.8297	89.8519	113.86	3.63754	9.08179	9.85748e-18	105.021	104.919	97.4027	117.411	4.0114	100.01	100.038	93.3726	110.411	3.26186	6.12977	3.78781e-08
ft_l_ft_r	101.074	101.037	88.691	109.301	4.30522	98.0519	98.0585	86.4806	112.744	4.32186	6.4031	5.19844e-10	102.14	102.6	90.838	114.789	4.67193	98.0725	98.1745	88.8563	107.558	3.43357	4.43728	3.2318e-05
ft_l_l	160.562	160.505	145.784	178.899	6.87779	154.387	154.51	136.349	179.813	6.22341	8.60342	3.22986e-16	159.987	160.018	150.437	172.072	5.26305	154.39	153.632	142.332	170.691	6.5204	4.22471	6.68141e-05
ft_l_ms_l	107.62	107.882	88.1576	125.285	5.67218	100.393	100.488	89.6451	111.189	4.58212	12.8084	1.43314e-30	108.124	108.279	98.8809	118.185	4.58298	100.584	99.1891	90.6891	113.228	5.12457	6.93603	1.09568e-09
ft_l_ms_r	151.594	151.522	131.773	161.43	5.19279	143.06	143.261	133.213	163.36	4.246	16.441	1.94602e-44	153.199	153.401	141.85	166.624	5.3546	143.549	142.835	136.879	156.261	4.20413	8.965	1.97094e-13
ft_l_orb_d_l	45.61	45.51	36.9931	52.8992	3.09045	43.0716	42.6483	34.9636	53.064	2.86147	7.78854	8.86145e-14	46.5632	46.6493	42.0662	54.4815	2.74213	43.9253	43.5826	37.8689	54.2568	3.48113	3.76479	0.000331918
ft_l_orb_d_r	90.8991	91.3606	79.4419	98.7722	3.62451	87.6779	87.9353	78.7952	99.2566	3.39547	8.38157	1.5203e-15	92.3579	92.5554	84.5108	101.949	3.81065	88.0385	88.1925	82.4486	99.8966	3.35011	5.38413	7.68082e-07
ft_l_orb_u_l	26.8278	27.1115	18.133	33.4035	2.655	25.0025	24.9984	18.957	31.4159	2.03958	7.04542	1.19239e-11	27.2335	26.8143	22.4662	33.7915	2.54976	25.0527	25.1381	20.0691	29.6828	2.05347	4.21297	6.97323e-05
ft_l_orb_u_r	83.3091	83.8634	73.3561	91.7184	3.38372	80.4991	80.5255	71.5745	92.8552	3.54254	7.4125	1.04291e-12	84.4149	84.5633	77.3402	94.3801	3.71039	80.5683	80.898	73.8701	89.8291	3.00794	5.0933	2.55275e-06
ft_l_po_l	81.4524	81.9104	65.3297	91.9736	4.81929	77.2563	76.7734	69.9036	86.1758	3.64073	8.97795	2.76257e-17	81.0974	81.2784	72.5734	88.3111	3.70193	77.2591	77.4324	70.3094	88.0154	3.93857	4.49101	2.43e-05
ft_l_po_r	137.729	137.742	121.091	150.952	4.85995	132.409	132.48	122.255	145.798	4.19711	10.7063	4.10297e-23	138.39	138.611	129.645	151.368	4.73588	132.104	131.925	126.746	140.904	3.09539	7.02635	1.34275e-09
ft_r_b	104.758	104.841	92.0937	114.618	4.47502	101.914	101.405	88.6818	117.723	4.62764	5.71	2.51118e-08	104.917	105.177	93.1948	118.08	5.1196	100.876	101.227	86.6546	113.693	4.85757	3.62174	0.000519359
ft_r_d_l	66.7973	66.8822	59.0136	76.7663	3.13591	64.1345	64.081	55.9202	73.8797	3.01079	7.91544	3.73882e-14	67.6296	67.4625	60.9837	76.9479	3.22666	64.276	64.238	59.0694	73.4888	2.85318	4.92424	4.73524e-06
ft_r_d_r	43.6142	43.7625	35.9271	51.7539	2.45701	42.4781	42.4862	38.1678	49.6516	2.0873	4.55411	7.46033e-06	43.949	44.0163	38.9037	50.4083	2.69577	42.5596	42.7048	37.9036	48.5997	2.21274	2.51961	0.0138722
ft_r_ec_l	103.9	104.338	90.3647	111.916	3.85878	99.8873	99.822	91.5864	111.592	3.66226	9.74733	6.68244e-20	105.107	104.763	96.5003	114.792	3.94224	100.27	100.208	93.0731	110.53	3.44545	5.84312	1.1768e-07
ft_r_ec_r	22.3036	22.3582	15.4884	31.041	3.12511	19.561	19.4023	11.0528	29.5138	3.43725	7.62943	2.5652e-13	22.6316	22.2407	17.5757	30.8022	3.11714	20.4715	20.2959	13.9723	32.0733	3.94063	2.71905	0.0081506
ft_r_l	160.352	160.223	143.615	178.39	6.78776	154.633	154.887	137.658	174.87	6.0065	8.1538	7.61211e-15	160.337	160.265	147.175	171.83	5.9227	154.715	153.826	145.058	171.041	6.01031	4.21345	6.69826e-05
ft_r_ms_l	150.899	151.097	128.768	162.249	5.14144	142.297	142.336	131.779	156.296	4.14575	16.8294	6.93166e-46	151.7	151.211	139.802	163.213	5.04812	142.74	142.271	131.831	153.708	4.76494	8.163	4.64382e-12
ft_r_ms_r	107.311	107.121	89.8204	120.494	5.46503	100.013	100.29	88.2441	115.812	4.63198	13.1656	5.44776e-32	108.345	107.855	96.5483	118.436	4.93393	100.449	100.711	90.0501	114.01	4.89271	7.1873	3.46118e-10
ft_r_orb_d_l	91.7934	92.2902	81.6685	99.9242	3.5932	88.229	88.0997	79.8536	98.9084	3.33582	9.3947	9.7827e-19	92.7625	93.003	84.9188	101.486	3.5624	88.7222	88.6217	81.5077	100.487	3.52306	5.10012	2.32324e-06
ft_r_orb_d_r	45.6312	45.7155	37.0031	54.5297	2.86615	43.0098	42.795	35.2982	52.5473	2.9335	8.25996	3.51428e-15	46.3082	46.2058	40.7333	54.15	2.92753	43.6849	43.2421	38.6815	55.7309	3.38478	3.70752	0.000394331
ft_r_orb_u_l	84.0036	84.5173	73.1382	93.3328	3.46755	81.0584	80.76	72.3833	92.6617	3.5479	7.67201	1.9012e-13	84.8955	85.1387	76.3251	94.9204	3.6346	81.144	81.2011	74.3641	90.3064	3.30289	4.83114	6.73433e-06
ft_r_orb_u_r	27.4068	27.482	17.9271	33.1823	2.55365	25.6902	25.5852	18.7238	31.468	2.12383	6.67887	1.06056e-10	27.7187	27.6851	22.2395	33.929	2.43403	25.6376	25.8814	21.5724	29.5263	2.08235	4.10905	9.91732e-05
ft_r_po_l	136.471	136.82	118.735	146.697	4.69417	131.012	130.943	122.284	143.718	3.74947	11.7406	1.14844e-26	136.95	137.125	128.221	148.869	4.72478	131.244	131.732	119.933	139.449	4.20671	5.7041	2.06969e-07
ft_r_po_r	81.7188	81.6055	64.4425	92.7565	4.80334	77.7934	77.5315	66.6848	89.7338	3.80217	8.28078	3.52226e-15	81.3767	81.4743	72.2433	89.3326	4.07679	77.2769	76.6096	70.1611	87.9145	4.06673	4.50291	2.3151e-05
ftm_l_b	117.725	117.732	103.612	132.151	4.57683	112.504	112.31	99.9913	136.142	4.77649	10.1993	2.00692e-21	118.163	116.975	110.1	129.867	4.38489	112.114	113.118	102.751	122.621	4.42063	6.14413	3.17413e-08
ftm_l_d_l	42.6525	42.4818	37.1608	48.0949	2.07017	41.0526	40.8884	36.7434	47.5997	2.03434	7.12378	6.56467e-12	43.031	43.1246	37.4628	48.3212	2.30789	41.033	40.9993	37.4684	44.9544	1.87216	4.25204	6.04712e-05
ftm_l_d_r	67.2603	67.3591	59.7158	77.415	3.2941	64.0062	63.8196	56.75	74.876	3.03057	9.3947	9.8438e-19	68.2683	68.3316	60.8008	78.8291	3.59248	64.1432	64.3982	59.1352	73.5595	2.80886	5.72118	2.13357e-07
ftm_l_ec_l	9.23649	9.35704	3.95916	14.0885	1.82768	9.29201	9.1803	3.98097	14.4785	2.01107	-0.263984	0.791957	9.14537	8.90072	5.29034	14.1373	2.2391	8.78769	8.73623	4.79464	12.8722	1.91763	0.767339	0.445251
ftm_l_ec_r	104.789	105.082	92.7929	113.053	3.90052	100.598	100.59	91.3627	113.779	3.65548	10.1303	3.48984e-21	106.324	106.155	98.5533	118.719	4.07599	100.657	101.046	94.5254	109.683	3.38559	6.76382	2.50528e-09
ftm_l_ft_l	14.8487	14.6277	7.27187	21.9082	2.86308	12.3095	11.8754	6.49487	20.3218	2.83988	8.13699	8.21525e-15	15.7432	15.8379	8.55581	21.1698	2.72316	13.4672	12.5725	8.07929	24.5423	3.68654	3.14061	0.00244839
ftm_l_ft_r	105.547	105.712	93.7401	114.982	4.04261	101.302	101.506	91.4433	115.168	3.90397	9.76144	5.95354e-20	106.705	106.074	97.3613	116.406	4.31156	101.536	101.417	94.526	113.001	3.52591	5.8694	1.11182e-07
ftm_l_ftm_r	107.846	107.845	93.8993	116.888	4.28273	103.197	103.384	93.4713	117.266	3.9773	10.2792	1.09501e-21	109.163	109.59	99.9469	120.851	4.40104	103.253	102.874	96.5775	113.916	3.50888	6.64005	4.50412e-09
ftm_l_l	167.038	166.971	152.126	183.492	6.85123	160.019	160.174	144.162	190.238	6.57806	9.55002	2.98453e-19	166.791	166.723	155.707	183.157	5.7755	159.99	159.903	145.786	175.091	6.79607	4.82292	7.1086e-06
ftm_l_ms_l	101.816	101.424	86.7557	117.045	4.75224	95.913	95.7132	83.1633	108.437	4.32862	11.8667	2.79277e-27	101.729	102.176	93.5783	113.211	4.66153	95.0004	95.0662	88.1479	104.767	4.18877	6.79001	2.05824e-09
ftm_l_ms_r	150.223	150.686	132.159	161.089	4.61332	141.874	141.846	131.509	162.196	4.29129	17.1242	1.70475e-47	151.433	151.768	141.488	165.611	5.45277	141.593	140.945	136.063	151.248	3.62161	9.50766	4.24131e-14
ftm_l_orb_d_l	35.5463	35.5074	31.2906	39.8623	1.70265	34.3976	34.3731	29.2722	38.4318	1.62215	6.31232	8.8238e-10	35.724	35.7594	32.5437	40.5201	1.72054	34.1627	34.0798	31.2858	37.8541	1.5284	4.29076	5.12547e-05
ftm_l_orb_d_r	88.8022	88.9039	79.0695	97.2178	3.42864	85.5523	85.6016	77.6221	96.0122	3.33872	8.77562	9.12168e-17	89.8903	90.314	83.9262	99.7279	3.60228	85.4407	85.8389	79.3482	94.534	3.17971	5.85696	1.10426e-07
ftm_l_orb_u_l	27.9141	27.9867	22.6253	32.9481	2.18221	26.0715	26.0195	20.1765	30.9945	2.09591	7.87005	5.07799e-14	28.4544	28.8395	23.8838	31.9861	1.90932	26.1024	26.1109	22.8164	30.2831	1.50052	6.12573	4.00668e-08
ftm_l_orb_u_r	86.2505	86.6244	76.4167	96.059	3.53071	82.7288	82.6199	73.8508	94.6447	3.4724	9.19002	4.39929e-18	87.3845	87.7774	79.471	97.008	3.75036	82.8354	83.1211	77.1028	93.2571	3.18578	5.84685	1.182e-07
ftm_l_po_l	78.2221	78.2911	69.8798	87.6851	3.59364	74.775	74.5873	67.1954	86.768	3.719	8.61378	2.91621e-16	77.5968	77.7444	68.9065	85.3774	3.61167	74.0133	73.9973	66.3296	79.1041	3.15449	4.72636	1.01784e-05
ftm_l_po_r	138.94	139.598	125.726	149.998	4.53163	133.263	132.94	123.65	147.168	4.34614	11.6828	1.21749e-26	139.48	139.242	129.443	153.311	4.94196	132.56	132.212	125.958	138.385	2.82576	7.68769	1.37383e-10
ftm_r_b	117.825	117.259	103.289	130.113	4.46337	112.8	112.79	101.434	130.201	4.42325	10.3353	6.81908e-22	118.542	118.342	110.114	131.066	5.02308	112.23	112.225	101.287	119.738	4.09661	6.15926	3.33717e-08
ftm_r_d_l	67.4141	67.3267	58.5362	76.9593	3.28632	64.4884	64.4754	57.0108	74.3037	2.94517	8.56749	4.19588e-16	68.4587	68.8378	61.6473	79.4188	3.37202	64.4821	64.5413	58.8667	73.3082	2.70528	5.81767	1.40122e-07
ftm_r_d_r	42.7457	42.5637	35.2239	48.2315	2.20112	41.5463	41.5455	37.4482	46.7934	1.86578	5.37156	1.4952e-07	43.1628	43.4915	39.1994	48.3677	2.02407	41.3967	41.4093	37.5014	45.034	1.975	3.94991	0.000170394
ftm_r_ec_l	105.124	105.368	92.1909	113.689	3.97968	100.866	100.666	92.1018	113.124	3.72147	10.0995	4.4453e-21	106.493	106.836	97.7312	118.13	4.08162	101.038	100.951	94.4261	110.269	3.34592	6.53605	6.75123e-09
ftm_r_ec_r	9.55181	9.59128	4.86634	14.959	1.84858	9.17438	9.10393	4.51604	16.2423	2.05146	1.76624	0.0782841	9.19443	8.71741	4.53595	15.0172	2.43045	9.26436	8.89853	6.43795	14.7411	2.01709	-0.140033	0.889007
ftm_r_ft_l	105.327	105.467	92.6791	113.373	4.04166	101.364	101.399	90.8636	116.211	3.91915	9.09693	8.77492e-18	106.739	106.404	97.6661	117.981	4.29708	101.489	101.333	93.8953	112.143	3.34602	6.09643	4.57747e-08
ftm_r_ft_r	14.5196	14.4791	7.40857	20.8294	2.77322	11.9348	12.0561	5.57365	20.7229	2.92848	8.28201	3.0354e-15	15.1798	14.5541	8.69084	21.3326	3.08664	12.556	12.094	7.47989	26.1483	3.43184	3.59517	0.000569308
ftm_r_l	166.785	166.704	151.585	184.193	6.81504	160.162	160.256	145.473	181.977	6.34467	9.19177	4.42848e-18	166.786	166.585	155.712	183.741	6.28359	160.327	159.978	148.404	174.42	5.97162	4.71244	1.05287e-05
ftm_r_ms_l	149.445	149.553	128.293	161.54	4.83745	141.274	141.483	129.438	152.626	4.09279	16.664	1.96135e-45	149.945	149.764	138.95	164.803	5.26644	141.23	140.106	131.87	151.663	4.39452	8.03596	9.72319e-12
ftm_r_ms_r	101.775	101.909	89.8697	114.903	4.46822	95.8101	95.848	83.5567	107.765	4.06391	12.7633	1.39432e-30	102.101	102.729	90.6638	113.773	5.23937	95.5733	95.0123	87.7198	107.223	4.10949	6.20023	2.94404e-08
ftm_r_orb_d_l	89.598	89.7633	78.9903	97.1452	3.49374	86.3451	86.2623	79.337	96.6807	3.23362	8.83039	6.25592e-17	90.6075	90.8825	83.063	101.716	3.58565	86.467	86.7553	79.2239	96.3085	3.26522	5.39971	7.10813e-07
ftm_r_orb_d_r	35.9052	35.9025	30.1631	40.1593	1.80576	34.8912	34.9141	30.5155	40.8022	1.55441	5.49938	7.7291e-08	36.2281	36.3215	32.5806	40.428	1.74564	34.8864	35.1137	32.3584	38.2843	1.56886	3.61536	0.000532761
ftm_r_orb_u_l	86.6778	86.8757	76.27	95.1689	3.60136	83.3206	83.3652	74.0213	94.425	3.45682	8.69116	1.6799e-16	87.9339	88.2966	79.927	99.0898	3.63931	83.3158	83.4401	76.0455	92.8111	3.33565	5.91643	8.45125e-08
ftm_r_orb_u_r	28.4376	28.3426	22.4118	35.8257	2.15906	26.8558	26.7891	21.0303	31.883	2.06277	6.84559	3.70207e-11	29.2194	29.1505	26.0274	32.9823	1.82283	26.7591	26.7183	23.3727	29.7455	1.50544	6.58197	5.49932e-09
ftm_r_po_l	137.539	138.24	122.385	147.221	4.60773	131.935	131.953	122.358	144.097	3.84888	12.0638	6.69359e-28	138	137.435	129.546	152.617	5.12712	131.884	132.049	122.995	138.301	3.87354	6.01965	6.53522e-08
ftm_r_po_r	78.7705	78.8609	69.9384	86.7566	3.52332	75.5552	75.3605	67.114	85.0947	3.68084	8.15454	7.31612e-15	77.8664	77.8421	67.9591	88.9745	4.02251	74.629	74.7315	68.2073	80.0773	3.0141	4.07349	0.00011722
g_al_l	56.2799	56.427	47.6597	67.6599	3.25012	53.7039	53.5217	46.0039	65.0849	3.47658	6.99477	1.48103e-11	56.1714	56.1459	50.1174	62.8024	3.22642	54.2854	53.8939	47.3232	62.2775	3.53445	2.4925	0.0148223
g_al_r	56.1119	56.2498	46.7418	65.2467	3.23918	53.6382	53.2356	45.1999	63.3401	3.43248	6.77336	5.76061e-11	56.2587	55.875	50.3002	63.4455	3.29841	54.3316	54.2528	47.6588	62.9449	3.75146	2.43987	0.0169999
g_alv	84.7321	84.6523	74.6993	95.2691	3.85222	79.6637	79.5695	70.7801	90.6926	3.73341	12.2095	1.44209e-28	84.6749	84.853	76.4316	96.3961	4.51486	79.9249	79.6199	70.3417	89.4086	4.39796	4.7664	8.54417e-06
g_ast_l	162.106	161.922	148.611	176.98	5.82455	151.769	151.304	139.509	165.828	4.79853	17.701	2.25438e-49	161.661	161.183	148.068	176.79	5.50335	151.546	152.001	140.161	162.89	5.2302	8.42604	1.42913e-12
g_ast_r	162.451	163.086	143.785	174.412	5.48227	152.493	152.158	138.915	179.538	5.22349	16.9955	5.0879e-47	162.821	162.441	152.457	179.194	5.70376	151.971	151.673	140.821	167.205	5.08537	8.98043	1.30868e-13
g_b	108.336	108.85	92.8095	124.6	5.59012	101.671	101.613	88.3465	120.584	5.48403	10.9982	3.37649e-24	108.616	107.002	100.32	124.186	5.41977	100.682	101.024	90.5059	109.277	4.24772	7.28729	2.89278e-10
g_ba	114.475	114.874	101.993	126.48	5.14315	107.377	107.311	94.8519	128.276	4.86901	12.9498	2.60029e-31	115.026	114.703	102.548	128.201	5.36291	108.091	107.082	98.3357	124.046	5.81927	5.54231	3.96396e-07
g_d_l	25.4091	25.418	20.4853	31.6516	2.34308	24.6506	24.5546	17.6501	37.5963	3.1091	2.51775	0.0123169	25.2945	24.4979	21.4784	32.0191	2.58494	24.0498	23.4703	20.0979	29.7995	2.30862	2.27154	0.0259061
g_d_r	25.5358	25.3737	18.5474	31.7032	2.41439	24.6909	24.5863	16.2878	37.3951	3.12873	2.76286	0.00606984	25.9231	25.2819	22.079	31.9395	2.15421	24.6485	24.654	20.0294	30.6227	2.67452	2.34736	0.0215615
g_ec_l	60.9734	60.6818	53.5865	70.6782	2.64909	58.0904	58.2784	48.7657	68.068	2.78098	9.70027	9.5572e-20	61.5817	61.6332	54.5861	70.1752	3.03655	58.1066	57.8856	53.1235	63.3017	2.52313	5.56701	3.78919e-07
g_ec_r	61.0994	61.2645	54.6118	68.1127	2.48256	58.3101	58.3546	52.2235	65.2826	2.48587	10.2599	1.23477e-21	62.2777	62.3441	57.5512	71.0345	2.91019	58.6713	59.1775	53.5101	64.8936	2.63591	5.8089	1.33011e-07
g_en_ba	115.399	115.967	103.358	127.68	5.0781	108.199	108.307	95.6502	128.777	4.78937	13.3297	9.65818e-33	115.884	115.683	103.377	128.796	5.27083	108.864	107.763	98.9862	124.902	5.80975	5.65971	2.46332e-07
g_eu_l	132.344	131.979	115.802	152.468	7.0697	124.707	124.905	107.776	144.522	6.34686	10.3883	4.81326e-22	130.818	129.373	119.65	146.258	5.99101	125.326	125.213	115.792	135.016	5.20081	4.37808	3.74798e-05
g_eu_r	132.91	132.717	119.066	154.03	6.82193	125.723	125.964	109.126	142.154	5.86737	10.3213	8.70337e-22	132.879	131.567	122.17	149.329	5.89263	126.043	125.94	117.843	135.176	4.6921	5.73978	1.9423e-07
g_foram_l	135.728	136.208	121.188	147.988	5.1181	127.664	127.757	115.041	149.109	4.95323	14.6316	9.43348e-38	136.334	135.725	124.396	151.085	5.83719	128.333	129.077	116.868	145.505	6.3206	5.88146	9.75037e-08
g_foram_r	135.688	135.964	120.132	147.531	5.13815	127.658	127.797	116.996	148.701	4.92424	14.5808	1.50383e-37	136.329	135.542	124.601	151.35	5.9828	128.147	128.916	117.74	145.587	6.22705	5.99183	6.06583e-08
g_ft_l	57.7108	57.8424	48.6484	64.7689	3.13695	54.6916	54.6098	44.5295	66.718	3.13545	8.79708	7.79393e-17	58.2579	57.9675	48.1027	65.813	3.60032	54.4574	54.5983	48.2369	59.396	2.5043	5.48079	6.36894e-07
g_ft_r	58.2693	58.454	52.4183	66.9765	2.97975	55.2545	55.157	47.0201	64.0501	2.90421	9.36338	1.2112e-18	59.0709	58.5233	51.4052	67.255	3.00075	55.3832	55.3318	50.9279	60.3563	2.60187	5.87222	1.04829e-07
g_ftm_l	60.7258	60.8349	53.6921	69.6512	3.01382	57.2847	57.4843	48.4194	69.6323	3.09139	10.3	9.03922e-22	61.2749	61.0561	51.9401	68.5321	3.39247	57.2551	57.0391	51.404	64.5216	2.47777	6.05183	5.99774e-08
g_ftm_r	61.0264	61.1066	51.9846	69.0519	2.93818	57.8317	57.6776	50.5344	66.0786	2.87777	10.0382	7.00159e-21	62.1938	61.9384	57.119	69.255	2.86322	58.0168	58.5861	52.3325	64.2624	2.67627	6.74046	2.48746e-09
g_l	179.864	180.022	163.666	198.693	8.13948	170.182	169.691	150.158	199.347	7.32105	11.4295	1.07755e-25	179.908	179.582	165.737	201.147	7.42588	169.877	169.694	155.073	188.37	7.68038	5.93881	7.57042e-08
g_ms_l	141.016	141.178	124.427	157.3	5.64149	131.769	131.629	120.815	147.612	4.83945	16.0767	3.47405e-43	141.386	141.281	124.615	157.603	5.75264	131.33	131.811	123.068	143.936	5.70044	7.85302	1.81253e-11
g_ms_r	141.562	142.156	127.414	155.662	5.0611	132.287	132.586	120.636	153.436	4.69055	17.3688	1.86673e-48	142.811	143.252	127.901	158.56	6.0946	132.184	131.457	121.333	146.863	5.33923	8.29504	2.8252e-12
g_n	9.37507	9.29756	5.13153	13.4196	1.75093	9.96971	9.71674	6.29992	19.1142	2.02013	-2.87449	0.00431311	8.61739	8.44332	5.3993	12.6725	1.54791	9.95211	9.83871	7.22829	15.0977	1.63729	-3.74651	0.000342511
g_ns_l	63.5832	63.7112	54.198	77.6572	3.35309	61.1692	60.9052	52.8396	72.0817	3.33973	6.5918	1.70929e-10	63.1285	63.0488	56.7263	71.4816	3.41091	61.6693	61.1294	56.5562	71.4748	3.45247	1.90161	0.0609152
g_ns_r	63.2413	63.2282	52.6478	75.8192	3.22053	61.1602	61.1239	54.7759	71.0188	3.3512	5.78614	1.66819e-08	63.071	62.5145	57.3449	70.8354	3.29221	61.7463	61.6442	55.7143	71.2322	3.40365	1.76932	0.0807542
g_o	149.916	150.293	135.457	163.422	5.62635	141.832	141.917	129.904	163.527	5.30404	13.5113	1.97646e-33	150.579	150.722	138.598	163.548	6.08741	141.992	141.65	132.635	156.805	5.87515	6.41938	9.83805e-09
g_op	184.861	184.762	168.114	204.918	8.38417	174.802	173.842	156.582	205.688	7.4181	11.6119	2.46341e-26	185.147	183.505	173.369	205.414	7.56868	175.023	173.889	160.585	194.773	8.58247	5.59549	3.24955e-07
g_op_n	184.987	185.028	167.871	204.524	8.34424	175.117	174.268	157.294	204.917	7.31653	11.4941	6.64603e-26	185.361	183.021	172.872	205.959	7.46953	175.234	174.24	161.298	194.49	8.43389	5.68485	2.2467e-07
g_orb_d_l	52.7222	52.7273	46.982	63.2053	2.7381	51.2038	50.8674	44.137	60.7416	3.02579	4.8085	2.31876e-06	52.78	52.6589	45.5904	59.7797	3.11497	51.3457	50.7995	46.2324	58.9656	2.75095	2.18289	0.0320982
g_orb_d_r	52.1272	52.3117	45.3593	60.7943	2.46858	50.8275	50.9974	42.8728	60.0338	3.00621	4.31798	2.10303e-05	52.7538	52.703	45.4948	59.9906	3.032	51.1476	50.8939	46.0792	58.4932	2.93946	2.40556	0.0185184
g_orb_u_l	33.4153	33.2354	27.5619	39.2448	2.02579	31.8707	31.8758	25.4612	39.8277	2.07968	6.87508	3.0837e-11	33.488	33.2906	28.4754	40.087	2.19853	31.7742	31.8504	28.0084	35.8008	2.0042	3.64334	0.000484982
g_orb_u_r	33.2042	33.4295	27.6941	38.1261	1.88743	31.6921	31.6386	27.1978	36.7607	1.81084	7.47068	7.14535e-13	33.7047	33.6231	29.8169	38.5246	1.85692	31.9335	32.2539	27.8919	36.0916	1.99782	4.10715	9.83915e-05
g_po_l	121.261	121.658	109.717	132.853	4.69613	114.611	114.757	103.079	127.203	3.99767	13.9339	6.74049e-35	121.216	121.877	110.696	135.048	4.74166	114.14	113.551	104.681	123.196	4.46932	6.86888	1.4171e-09
g_po_r	122.493	123.01	111.962	132.388	4.37154	116.056	115.921	105.264	131.501	4.00774	14.0256	2.28248e-35	122.706	122.529	112.231	136.529	4.76487	115.272	115.04	107.843	123.967	3.9774	7.57502	7.34441e-11
g_ra_l	118.567	118.745	104.682	130.657	4.835	110.126	110.396	97.6671	125.71	4.47748	16.5533	3.10987e-45	118.509	117.962	107.66	134.086	4.91022	109.774	109.884	100.932	119.302	4.87286	7.98625	1.0009e-11
g_ra_r	118.129	118.447	106.465	130.144	4.9659	110.315	110.298	98.9666	129.791	4.44398	15.1526	1.09874e-39	118.191	117.238	107.788	132.405	4.7967	109.936	109.715	102.064	122.557	4.61075	7.8471	1.8767e-11
g_zma_l	81.5212	81.7752	69.2711	92.8673	4.0693	76.5539	77.0823	67.1495	88.8853	4.01224	11.2328	4.96482e-25	81.7491	82.4011	71.8538	88.9611	4.31355	76.8611	76.9765	69.2044	84.2919	4.29399	5.07928	2.52247e-06
g_zma_r	81.6315	81.803	72.0679	92.1904	4.09587	76.9556	77.3942	67.2691	89.1284	4.02636	10.5206	1.57228e-22	82.0764	82.103	73.374	94.156	4.59014	77.7834	76.5957	71.4666	87.9259	4.24625	4.34205	4.22083e-05
g_zo_l	50.7032	50.9873	41.9313	61.1158	3.2562	50.1904	49.9042	42.3358	62.5304	3.60428	1.36421	0.173434	51.6678	51.6688	44.6083	59.3038	3.92182	50.3553	49.7731	46.3434	57.3292	2.87146	1.7078	0.0920143
g_zo_r	49.195	49.33	40.5696	57.2211	3.20761	48.8052	48.7601	38.459	60.4993	4.02039	0.979406	0.328128	49.8652	49.0701	42.4148	57.309	3.50302	50.1308	49.9629	41.2783	58.0793	3.76013	-0.32681	0.744692
g_zy_l	102.848	102.932	92.1998	111.692	3.81644	96.5176	96.1799	87.0422	106.487	3.83659	15.1164	1.19887e-39	103.41	103.275	90.9985	116.013	4.64555	97.0865	96.4796	87.9967	106.066	3.94836	6.55927	5.86174e-09
g_zy_r	103.66	103.612	91.5317	114.37	4.01176	96.78	96.2769	87.8855	106.869	3.57638	16.544	4.04923e-45	104.587	104.558	95.4145	117.148	4.24892	97.2751	96.9812	88.946	106.784	3.68486	8.222	3.97302e-12
l_d_l	168.588	169.001	153.092	185.456	7.33642	161.806	161.597	143.437	191.127	7.05058	8.61345	2.92706e-16	168.57	167.594	157.121	186.886	6.74788	161.921	161.447	148.332	180.835	7.70354	4.10583	9.97904e-05
l_d_r	168.297	168.33	154.496	185	7.22113	162.008	161.557	144.576	189.986	6.90903	8.13156	8.57085e-15	168.408	167.993	158.607	186.817	6.66341	161.931	161.747	147.667	179.209	7.66086	4.03468	0.000128422
l_ec_l	167.039	167.594	151.791	184.049	7.08652	159.955	159.952	144.032	188.284	6.48609	9.52999	3.57206e-19	166.825	166.315	155.962	184.499	5.80227	160.083	160.401	145.2	175.215	6.9319	4.71687	1.07214e-05
l_ec_r	166.609	167.014	149.821	183.776	7.05691	159.992	160.105	143.093	182.321	6.47529	8.92855	3.08471e-17	166.765	165.748	155.976	184.908	6.25668	160.191	159.671	147.789	173.228	6.17047	4.73129	9.76823e-06
l_ms_l	128.604	128.48	110.664	144.515	6.24713	122.241	121.791	106.939	136.064	6.18278	9.355	1.28662e-18	129.151	129.915	114.427	141.367	6.6414	124.184	124.456	108.747	141.016	6.82041	3.30007	0.00145927
l_ms_r	128.8	128.982	110.607	146.508	6.48548	122.77	122.123	108.701	138.835	6.38656	8.56001	4.26334e-16	129.597	130.986	113.26	140.887	6.69063	124.337	124.743	113.099	138.262	5.91158	3.72604	0.00036946
l_orb_d_l	176.591	176.676	160.135	195.403	7.54559	169.594	169.189	151.279	195.739	6.71618	8.95055	2.68795e-17	176.895	176.446	164.752	196.477	6.52887	169.925	169.477	153.432	186.009	7.74082	4.35311	4.14049e-05
l_orb_d_r	176.526	176.671	157.994	196.061	7.60502	169.858	169.686	150.568	192.483	6.76154	8.46786	8.53129e-16	177.021	175.737	165.83	196.922	6.89826	170.127	169.946	154.665	183.169	7.15925	4.38559	3.58144e-05
l_orb_u_l	173.087	173.164	158.503	191.316	7.54593	165.364	164.806	146.256	194.615	6.99024	9.7017	9.61473e-20	172.929	172.333	161.756	189.165	6.25605	165.083	164.732	151.604	183.233	7.44033	5.10451	2.39228e-06
l_orb_u_r	172.985	172.845	157.921	190.963	7.63362	165.705	165.421	148.789	191.51	6.90964	9.1363	6.80024e-18	173.243	173.314	161.235	192.141	6.77321	165.518	165.449	152.502	182.866	6.98166	5.02324	3.15044e-06
l_po_l	118.627	118.959	103.854	131.911	5.73577	114.67	114.415	104.01	126.852	5.15191	6.63249	1.3606e-10	118.517	118.766	107.686	132.754	5.89634	115.256	115.801	102.263	127.689	5.76525	2.50083	0.0144876
l_po_r	118.46	118.983	101.568	135.219	5.80454	114.804	114.852	100.479	129.396	5.10388	6.11202	2.80153e-09	119.253	120.26	106.214	133.429	6.0986	115.569	115.365	104.065	128.259	4.98973	2.95749	0.00414513
ms_l_d_l	116.786	116.484	99.4397	130.167	5.21333	109.221	109.032	96.3084	123.765	4.75787	13.8509	1.07751e-34	117.23	116.877	104.916	127.006	4.74637	109.193	108.221	100.299	119.453	5.31816	7.13121	4.68355e-10
ms_l_d_r	128.091	128.086	110.795	141.42	5.50007	119.912	119.632	107.457	133.982	4.74912	14.5449	2.89882e-37	128.729	128.182	115.548	142.956	5.46868	119.801	119.319	110.079	132.668	5.6885	7.15589	4.00048e-10
ms_l_ec_l	96.4645	96.2455	82.2377	113.523	4.7664	90.3242	90.2921	79.9313	103.414	4.07075	12.6593	4.06182e-30	96.3874	96.3084	87.7538	105.558	3.81117	89.6531	89.8776	81.8622	98.8496	4.20082	7.50913	8.75525e-11
ms_l_ec_r	143.095	143.269	122.811	154.86	4.80475	135.346	135.398	123.135	146.347	3.97109	16.0646	5.1219e-43	143.936	144.617	134.439	157.995	4.82221	135.163	134.568	126.994	143.393	4.15572	8.71566	4.52564e-13
ms_l_ms_r	112.127	112.484	97.7071	121.472	4.3596	105.267	105.175	93.3907	118.05	4.48558	14.1709	5.67152e-36	112.951	113.112	105.478	120.199	4.04039	105.76	105.856	98.8872	114.136	3.89194	8.10755	5.87501e-12
ms_l_orb_d_l	101.009	100.866	83.6332	116.638	5.30445	94.7702	95.0187	82.8837	111.014	4.50807	11.5818	3.48184e-26	101.425	101.23	94.5236	111.568	3.92747	94.0529	93.6464	83.5894	104.533	5.2744	7.0903	7.49452e-10
ms_l_orb_d_r	130.843	130.901	110.818	143.589	5.10509	123.576	123.601	110.969	135.171	4.19126	14.2171	6.84941e-36	131.453	131.721	121.174	144.899	4.756	123.157	123.195	115.502	134.294	4.76734	7.79175	2.37978e-11
ms_l_orb_u_l	120.203	120.276	103.515	136.301	5.16557	112.925	112.962	102.455	127.637	4.24837	14.0619	2.63509e-35	120.776	120.451	108.295	132.019	4.52635	112.193	111.32	105.492	122.943	4.78027	8.2462	3.19711e-12
ms_l_orb_u_r	146.116	145.852	126.22	158.409	5.15836	138.048	137.915	125.691	149.685	4.14665	15.7534	1.03598e-41	147.065	147.355	134.55	161.224	5.04107	137.792	138.288	129.701	149.218	4.6729	8.532	9.10531e-13
ms_l_po_r	120.574	120.736	106.166	131.233	4.59838	114.075	113.47	101.402	127.295	4.37471	13.2331	2.21339e-32	121.485	121	114.866	130.776	4.51923	114.692	114.483	108.451	121.801	3.69612	7.35919	1.95293e-10
ms_r_d_l	128.756	129.157	112.964	141.152	4.75012	120.528	120.266	110.179	141.278	4.64247	16.0091	3.815e-43	130.189	130.546	117.057	143.694	5.57742	120.719	120.001	110.224	132.589	5.09942	7.92486	1.37834e-11
ms_r_d_r	117.097	117.441	101.878	127.887	4.82437	109.717	109.505	99.2976	130.194	4.63112	14.2624	2.55468e-36	118.144	118.909	106.6	128.136	5.54773	109.597	109.201	100.615	120.995	5.35624	7.00977	7.58625e-10
ms_r_ec_l	144.3	144.925	127.801	153.986	4.46118	136.064	136.074	125.473	156.936	4.25883	17.2553	4.74071e-48	145.563	146.207	136.843	157.722	4.96958	136.076	135.508	129.153	144.219	3.55837	9.81615	7.79379e-15
ms_r_ec_r	96.3034	96.4223	83.3379	107.791	4.50321	90.3491	90.3332	79.9318	105.949	3.93968	12.8601	6.73318e-31	96.8673	96.7252	85.9889	106.403	4.89373	89.9034	89.7272	80.5916	100.472	4.09219	6.90425	1.356e-09
ms_r_orb_d_l	131.782	132.585	115.567	141.295	4.78378	124.325	124.426	113.683	142.191	4.23876	15.0775	2.24803e-39	133.139	134.221	120.73	145.899	5.13712	124.184	123.47	115.386	135.805	4.57522	8.23327	3.62031e-12
ms_r_orb_d_r	101.923	102.598	87.4548	114.316	5.03992	95.5258	95.9812	85.0995	110.884	4.30385	12.4741	1.96191e-29	102.764	103.237	90.182	112.448	4.88342	95.1135	94.1439	83.9063	109.544	4.84513	7.03348	6.80394e-10
ms_r_orb_u_l	146.85	147.848	130.514	157.688	4.84384	138.582	138.557	127.003	158.704	4.35432	16.4051	1.36067e-44	148.384	148.781	136.34	162.692	5.549	138.282	137.502	131.013	150.574	4.38841	9.03043	1.44638e-13
ms_r_orb_u_r	120.723	121.134	106.088	132.193	4.87092	113.504	113.171	103.088	131.14	4.08158	14.6797	1.03609e-37	122.032	122.95	108.674	133.612	5.21842	113.207	112.609	104.955	127.198	4.5299	8.07655	7.54895e-12
n_al_l	47.3792	47.2936	39.6445	58.1473	2.79907	44.1131	43.8658	36.2429	51.9552	2.87583	10.5172	1.62018e-22	47.9447	47.9604	42.8038	54.1703	2.83085	44.6557	44.3769	38.1404	51.4121	3.14455	4.91636	4.85481e-06
n_al_r	47.2031	47.183	38.6095	55.7055	2.86942	44.0451	43.7982	36.4906	50.9332	2.86748	10.06	5.89637e-21	48.0485	47.6426	43.4789	54.9745	2.8252	44.7525	44.7947	38.739	51.5469	3.35523	4.75248	9.34121e-06
n_alv	76.2059	76.0674	66.6433	87.9129	3.7	71.0781	71.1049	62.3299	80.225	3.3065	13.3544	8.80494e-33	76.8625	76.7572	68.4612	88.0522	4.02434	71.4396	71.5433	61.858	81.4802	3.92813	6.09874	3.85289e-08
n_ast_l	157.927	157.705	143.23	171.845	5.67404	148.388	147.938	136.506	161.158	4.6913	16.7449	1.15675e-45	157.879	157.384	146.016	172.281	5.03412	148.27	148.482	136.55	159.673	5.18237	8.41162	1.506e-12
n_ast_r	158.269	158.874	140.731	170.764	5.34334	149.129	148.575	136.479	174.659	5.08905	16.0068	4.0651e-43	159.019	158.896	150.13	174.701	5.38312	148.715	148.946	137.029	164.324	5.07539	8.80814	2.61221e-13
n_b	113.067	113.167	97.65	128.184	5.51739	107.927	107.952	96.2922	127.453	5.38883	8.6125	2.93709e-16	113.063	111.766	106.328	127.467	4.85682	107.016	107.571	97.8176	117.205	4.26326	5.91779	8.60103e-08
n_ba	107.493	107.449	95.8467	120.676	4.98623	100.841	101.467	89.3957	120.462	4.58233	12.6932	2.48975e-30	108.649	108.22	97.1792	122.529	5.06528	101.646	101.453	93.0323	116.156	5.28838	6.04819	4.78703e-08
n_d_l	18.9621	18.9021	13.9756	26.4381	2.07638	17.8512	17.5278	11.9177	23.7836	2.27953	4.65571	4.68953e-06	19.3812	19.0969	15.0549	26.1357	2.16246	17.3336	17.0522	13.9193	21.242	1.94164	4.45606	2.78907e-05
n_d_r	19.1383	19.0493	13.3515	24.4093	2.2046	17.8275	17.5673	11.756	23.7442	2.23292	5.3983	1.28348e-07	20.1067	20.1264	17.2962	26.2145	1.79342	17.9814	17.7294	13.8765	22.8592	2.21269	4.71925	1.07815e-05
n_ec_l	57.1896	57.0589	50.3582	66.4742	2.61079	54.4261	54.6091	45.3322	63.8364	2.58173	9.72663	7.72923e-20	58.063	57.753	52.3939	65.9844	2.78178	54.451	54.6304	49.2737	58.8495	2.19148	6.45092	1.02158e-08
n_ec_r	57.2368	57.615	51.303	63.7471	2.49497	54.6316	54.761	48.852	61.5473	2.26476	9.99125	1.05776e-20	58.7435	58.6513	54.5637	66.9438	2.53533	54.9926	55.4666	49.3802	60.963	2.48209	6.68618	3.10111e-09
n_en_ba	108.494	108.399	96.7868	121.744	4.92415	101.758	102.078	90.3138	121.067	4.50665	13.0413	1.25139e-31	109.57	109.287	98.039	123.174	4.97675	102.512	102.113	94.3085	117.081	5.273	6.15695	3.0342e-08
n_eu_l	131.108	130.876	115.413	149.904	6.95744	124.368	124.506	108.025	143.799	6.307	9.27484	2.43554e-18	129.758	128.382	119.826	143.015	5.44873	125.004	124.217	115.134	135.807	5.24321	3.97636	0.000155492
n_eu_r	131.68	131.604	118.088	151.521	6.71648	125.401	125.521	109.769	142.35	5.80846	9.13784	7.02176e-18	131.842	130.888	122.004	146.988	5.44287	125.744	125.43	117.228	134.221	4.63737	5.3941	7.50183e-07
n_foram_l	129.13	129.259	116.268	143.658	5.04277	121.539	121.364	109.764	140.726	4.78841	14.1067	1.03233e-35	130.329	130.226	120.038	144.577	5.57653	122.307	123.481	111.133	138.184	5.78348	6.31538	1.53638e-08
n_foram_r	129.112	129.47	115.267	143.109	5.04798	121.563	121.641	111.052	140.428	4.74569	14.0798	1.33333e-35	130.342	129.873	120.146	144.871	5.69884	122.143	122.698	111.657	138.264	5.71406	6.42556	9.5416e-09
n_ft_l	57.1032	57.3513	48.1614	64.3931	2.95526	54.4384	54.5697	46.1602	65.5214	2.91725	8.29296	2.79036e-15	57.7503	57.6007	49.6983	64.7487	3.15336	54.4108	54.1651	48.3229	60.615	2.26833	5.43731	7.28303e-07
n_ft_r	57.5587	57.8417	51.7439	64.2013	2.79876	54.8541	54.6688	46.7784	62.6482	2.61895	9.1184	7.59323e-18	58.4322	58.0403	52.3032	66.5374	2.63859	55.1675	55.2509	50.0023	61.8551	2.4607	5.72281	1.87923e-07
n_ftm_l	58.2938	58.3011	51.0285	66.3378	2.94879	55.1578	55.1887	47.0822	66.4738	2.87857	9.83452	3.38654e-20	58.9599	59.098	50.9955	65.8602	3.13254	55.0673	55.0516	49.6651	61.4322	2.23601	6.39671	1.50136e-08
n_ftm_r	58.5479	58.5749	50.2871	66.293	2.86572	55.6657	55.449	49.1319	63.5113	2.64153	9.55633	2.91129e-19	59.8377	59.6143	54.674	66.6462	2.5779	55.8777	56.3382	50.1853	62.524	2.54644	6.91185	1.15931e-09
n_l	178.311	177.931	161.275	197.803	7.98536	169.929	169.3	151.123	198.118	7.18155	10.0856	5.13894e-21	178.613	177.887	165.537	198.8	7.01628	169.822	169.839	154.796	188.209	7.80418	5.29777	1.07677e-06
n_ms_l	134.536	134.637	115.226	151.089	5.56305	125.734	125.806	113.431	139.772	4.55902	15.8147	5.10377e-42	135.459	134.634	120.829	151.191	5.3742	125.336	125.231	117.766	136.904	5.37919	8.41982	1.44346e-12
n_ms_r	135.067	135.797	118.656	149.396	5.03027	126.24	126.117	114.925	145.636	4.46839	16.9521	1.02704e-46	136.905	137.262	123.809	152.041	5.72533	126.223	125.123	116.345	139.879	5.08795	8.82069	2.67504e-13
n_ns_l	54.5469	54.4479	45.0182	67.9669	2.88089	51.3639	51.2229	45.3702	58.6871	2.637	10.532	1.50629e-22	54.7802	54.9753	49.9685	62.7061	2.91466	51.8328	51.2322	46.7019	57.1118	2.60282	4.77023	8.54996e-06
n_ns_r	54.2058	54.2413	43.8359	66.116	2.85131	51.3507	51.2321	45.9662	58.0234	2.67409	9.43867	6.98993e-19	54.7232	54.5334	49.3273	61.9856	2.75617	51.9255	52.0046	45.8963	57.4574	2.71843	4.57075	1.79584e-05
n_o	143.624	143.314	130.755	159.311	5.58754	136.075	136.25	124.815	155.406	5.14614	12.8424	6.87934e-31	144.862	144.715	133.871	157.294	5.87013	136.366	136.336	127.312	150.154	5.47122	6.6964	3.01548e-09
n_op_n	181.928	181.603	165.71	202.296	8.25504	173.207	172.694	156.316	201.484	7.1481	10.3204	8.66498e-22	182.582	180.764	171.104	202.743	7.07471	173.291	171.845	159.085	192.185	8.42293	5.34227	9.31638e-07
n_orb_d_l	45.61	45.6037	39.9779	55.5488	2.66574	43.6882	43.5201	36.6263	51.5496	2.42377	6.89301	2.79615e-11	46.1956	46.4314	39.7103	53.0509	2.64907	43.8124	43.8991	38.9832	48.297	2.4665	4.16414	8.02854e-05
n_orb_d_r	44.9608	45.1197	37.8505	52.9782	2.4572	43.2529	43.5937	35.917	49.1317	2.4383	6.37549	6.10516e-10	46.1636	45.931	39.0587	52.0773	2.60271	43.6009	43.6366	38.6743	48.6157	2.62645	4.38335	3.60652e-05
n_orb_u_l	32.2928	32.1736	26.6808	37.7097	1.94406	31.1482	30.8981	26.0346	38.1545	1.99961	5.30333	2.08139e-07	32.4935	32.5112	28.7575	38.041	1.95799	30.9694	31.07	27.4927	34.584	1.73802	3.68181	0.000428078
n_orb_u_r	32.0798	32.2472	26.7531	36.6156	1.82872	30.9527	30.9487	26.5391	35.8427	1.69748	5.83791	1.26396e-08	32.6961	32.6885	29.5856	36.5819	1.60152	31.202	31.3054	27.2664	36.2017	1.7973	3.92542	0.000187098
n_po_l	116.238	116.667	105.157	129.621	4.50902	110.12	110.045	99.0593	121.086	3.80542	13.3996	7.34687e-33	116.679	116.573	107.841	129.863	4.34298	109.767	109.511	99.8356	117.802	4.2201	7.21945	3.01456e-10
n_po_r	117.49	118.04	107.968	126.596	4.21708	111.595	111.466	101.313	125.454	3.84963	13.3408	9.35341e-33	118.174	117.581	108.288	131.379	4.4623	110.947	110.802	102.955	118.637	3.75126	7.84118	2.25613e-11
n_ra_l	113.778	113.691	98.0379	126.491	4.77176	105.765	106.12	94.2144	119.891	4.33611	16.0603	2.92303e-43	114.174	113.682	105.017	129.053	4.58867	105.521	105.551	96.6185	113.857	4.79298	8.24747	3.15674e-12
n_ra_r	113.33	113.682	99.8728	126.42	4.97602	105.935	106.018	95.5456	123.987	4.29236	14.5416	3.00173e-37	113.814	113.358	104.82	127.374	4.51946	105.675	105.829	97.4741	118.538	4.67956	7.91277	1.39812e-11
n_zma_l	74.2122	74.3987	63.1307	85.1664	3.78986	68.9988	69.0637	59.8993	81.1657	3.52516	13.0165	1.50149e-31	75.0159	75.3928	66.7739	82.756	4.00577	69.2733	69.0449	61.6209	77.0934	4.06556	6.36345	1.24637e-08
n_zma_r	74.2847	74.337	64.4047	85.3056	3.87737	69.3987	69.7848	60.5648	78.7165	3.52135	12.0551	5.77399e-28	75.3062	75.6079	67.5241	87.0561	4.38665	70.2388	69.4552	63.972	78.9774	4.07923	5.35023	8.625e-07
n_zo_l	43.3469	43.3443	33.2559	52.4435	3.25244	42.4083	42.336	34.5523	51.9693	3.31144	2.61302	0.00938301	44.9211	44.7811	38.45	52.4848	3.6329	42.5392	42.1995	37.8849	48.8638	2.7843	3.2912	0.00153808
n_zo_r	41.7048	41.7947	32.0171	50.1694	3.46248	40.8799	41.1361	31.2471	51.8152	3.72326	2.09672	0.0367782	42.9828	42.2193	37.108	50.1239	3.18667	42.3064	42.5246	32.6818	49.8763	4.01194	0.834925	0.40644
n_zy_l	97.7374	97.8179	87.3739	106.417	3.78625	91.652	91.4563	81.865	99.7518	3.62009	15.0123	3.17425e-39	98.7328	98.7054	87.863	110.725	4.38738	92.2808	92.1623	82.408	101.694	3.88978	6.95936	9.97821e-10
n_zy_r	98.5346	98.5262	87.7592	109.687	4.03617	91.909	91.492	81.9339	101.725	3.37975	16.2645	7.7018e-44	99.8972	99.5687	91.0113	111.935	4.00931	92.4912	92.7724	83.4282	100.881	3.66386	8.62419	6.14035e-13
ns_l_al_l	11.3317	11.1734	7.79104	16.4078	1.56005	11.3288	11.0996	6.82517	15.9549	1.78906	0.0155455	0.987607	11.1841	11.395	7.66903	15.6258	1.69156	11.1281	11.2047	4.84675	14.1547	1.98802	0.135489	0.892584
ns_l_al_r	19.8406	19.8594	15.4483	23.6956	1.69203	19.4819	19.2568	14.5234	28.1683	2.12492	1.70644	0.088908	19.5078	19.5002	15.9259	23.0087	1.7557	19.5304	19.5837	13.7581	23.8704	2.03678	-0.0531962	0.957715
ns_l_b	156.76	157.031	141.734	170.701	5.48331	149.719	149.47	138.495	170.095	5.56447	11.6472	1.61527e-26	156.768	157.502	148.435	170.142	4.90427	149.212	150.082	139.488	160.7	5.10734	6.74891	2.3721e-09
ns_l_d_l	48.0042	48.2405	39.8037	56.0135	2.95364	44.2995	44.3464	35.2631	56.6164	3.80475	9.93958	2.07174e-20	48.0546	48.2095	41.3747	55.6343	3.73432	45.0421	45.3223	38.6996	52.224	3.38582	3.7798	0.000307236
ns_l_d_r	50.9425	50.7719	40.783	60.5164	2.99512	46.9201	47.1362	38.8427	56.6621	3.52242	11.2424	5.61757e-25	50.752	50.5006	44.3289	57.8285	3.98245	47.3499	46.6597	42.0689	54.4274	3.50723	4.05463	0.000119441
ns_l_ec_l	64.0353	64.2781	56.5137	71.3498	2.95284	60.949	60.9642	52.1821	71.5375	3.10732	9.30437	1.89825e-18	64.5797	64.6627	58.4951	71.3226	2.86231	61.2147	61.4989	54.9849	65.2612	2.27903	5.81676	1.41705e-07
ns_l_ec_r	71.8538	72.0608	62.6372	77.2444	2.69886	69.0503	68.9256	62.5959	76.8366	2.7051	9.48144	4.97315e-19	72.4478	71.8772	67.0111	78.2853	2.39197	68.7652	68.8263	63.0749	72.6892	2.34541	6.95252	9.71348e-10
ns_l_ft_l	80.314	80.6846	67.3029	92.0654	4.09134	75.7169	75.4542	65.9712	88.3071	4.16008	10.1816	2.28481e-21	81.3011	80.9343	74.2177	88.4933	3.72227	76.6432	76.3501	67.7607	87.6168	4.26753	5.20223	1.59677e-06
ns_l_ft_r	86.8771	87.0364	74.7918	96.8555	3.66673	82.1857	81.8886	72.2225	93.4842	3.53376	11.9054	1.884e-27	87.267	86.7375	80.2908	94.829	3.04342	82.5702	82.5357	75.6321	93.559	4.05071	5.86295	1.25123e-07
ns_l_ftm_l	71.5539	71.7907	62.3864	79.8532	3.29504	68.1936	67.9594	58.8237	77.2308	3.25549	9.37484	1.10913e-18	71.8914	71.345	64.9821	78.828	3.28363	68.1295	68.1161	63.0078	72.7396	2.75567	5.55017	4.02901e-07
ns_l_ftm_r	79.3577	79.573	68.277	86.8644	3.07624	76.0167	75.9335	68.2381	84.7941	2.83112	10.3271	7.57868e-22	79.5473	79.8286	74.7274	87.3884	2.66418	75.7926	75.5972	70.1922	81.5332	2.76729	6.18195	2.7139e-08
ns_l_l	191.347	190.812	170.102	210.257	8.13102	183.375	183.021	163.463	202.405	7.44707	9.3429	1.45498e-18	191.644	191.369	181.581	209.625	7.12824	183.357	182.781	166.774	197.726	7.95401	4.90692	5.04278e-06
ns_l_ms_l	113.758	113.483	97.1651	126.76	5.12055	107.455	107.441	90.2617	126.285	5.04748	11.3273	2.28372e-25	114.47	113.838	106.674	122.454	4.01496	106.258	105.829	95.5744	117.179	5.62357	7.51673	1.35678e-10
ns_l_ms_r	119.595	120.286	105.954	129.355	4.4546	113.024	113.186	99.8245	125.668	4.27645	13.7513	2.34423e-34	120.789	121.023	102.149	129.258	4.98688	111.99	112.15	104.012	125.016	4.7241	8.10168	6.08826e-12
ns_l_ns_r	10.4936	10.3766	5.30504	14.7796	1.90269	10.4515	10.4264	5.63591	18.101	2.47151	0.174234	0.861795	10.2207	10.1605	5.54515	15.8131	2.05578	10.1721	10.3681	6.05363	14.6482	2.43296	0.0964286	0.923434
ns_l_orb_d_l	36.3092	36.2065	30.1782	42.395	2.4945	34.1505	34.2205	27.0547	41.5143	2.5847	7.7661	1.01868e-13	36.4529	36.3028	30.8754	42.8647	2.55025	34.3517	34.6382	30.3305	38.051	2.13346	3.99678	0.000147897
ns_l_orb_d_r	44.2416	44.3601	36.6912	49.4706	2.27462	42.1364	42.1436	37.4383	48.0853	2.1285	8.73305	1.25509e-16	44.1305	44.203	39.5784	49.2782	2.0735	41.8382	41.6841	37.6781	46.0939	1.9968	5.03629	2.99505e-06
ns_l_orb_u_l	62.934	63.014	53.1357	71.9501	3.1959	60.4181	60.1291	52.7412	70.3681	2.92728	7.50181	5.904e-13	63.3535	63.0644	57.4278	68.5295	3.14752	60.6569	60.4696	56.2993	65.5742	2.62106	4.16387	8.22101e-05
ns_l_orb_u_r	68.0272	68.3367	58.1326	77.1925	2.9235	65.3813	65.3408	57.4534	71.9601	2.90019	8.30324	2.59673e-15	68.1619	68.2918	63.8545	73.512	2.55235	65.5374	65.5276	60.611	70.9686	2.37757	4.75855	8.85378e-06
ns_l_po_l	107.761	107.741	96.4219	118.448	4.66988	102.57	102.821	90.326	112.656	4.1007	10.7951	1.95437e-23	108.443	108.191	98.3127	116.145	4.00441	102.172	102.773	92.7276	109.928	4.22574	6.81301	1.80335e-09
ns_l_po_r	114.906	115.238	102.358	126.701	4.22733	109.876	109.75	98.6175	119.207	3.79176	11.4471	9.35976e-26	115.207	115.096	99.1316	122.227	4.09626	108.772	109.05	100.357	115.024	3.381	7.66227	5.11838e-11
ns_l_zma_l	47.4354	47.66	36.7244	57.5786	3.52167	44.7279	44.7775	37.68	53.5999	3.3607	7.18756	4.40244e-12	48.1119	47.9304	40.9441	57.8398	3.25619	44.5451	45.0556	38.3345	51.6077	3.44224	4.76084	8.75499e-06
ns_l_zma_r	57.0683	57.1027	46.9291	64.9601	3.45572	54.6683	54.5283	46.5118	64.7543	2.94656	6.82925	4.2274e-11	57.1172	57.3834	51.004	64.5796	3.59243	54.3267	54.0781	48.7379	62.1498	3.00345	3.7691	0.000322683
ns_l_zo_l	34.3491	34.4438	26.7938	41.4156	2.783	32.164	32.1025	23.1093	40.0845	3.01279	6.88489	2.9274e-11	35.0292	35.2632	29.0821	42.2583	2.82678	32.2221	32.529	25.6158	37.0985	2.54523	4.66746	1.26205e-05
ns_l_zo_r	41.385	41.3143	31.5352	48.1287	2.7369	39.3684	39.1043	31.4509	46.9886	2.86418	6.57836	1.85639e-10	41.0908	40.655	36.2229	47.7468	2.46895	39.817	39.8417	32.8272	45.3255	2.95162	2.09367	0.0396407
ns_r_al_l	19.3633	19.2671	15.1734	25.2781	1.84695	19.3409	19.1677	14.5644	26.1	2.00602	0.106093	0.915573	19.2784	19.0415	15.978	22.6955	1.45821	19.0157	18.8964	12.9892	23.6056	2.16164	0.637086	0.526195
ns_r_al_r	11.4962	11.469	7.38338	14.7443	1.54463	11.5207	11.5091	7.00924	16.9901	1.85855	-0.130892	0.895943	11.3305	11.2147	7.81717	14.5003	1.4611	11.7177	11.6314	5.30069	15.6721	1.96786	-0.9991	0.321093
ns_r_b	156.647	156.581	141.435	171.214	5.55979	149.784	149.879	139.177	169.46	5.6875	11.1512	9.71469e-25	156.832	156.863	149.21	171.183	4.70491	149.47	150.466	140.387	161.872	4.98157	6.79545	1.94931e-09
ns_r_d_l	50.3936	50.4707	41.722	57.0437	2.88213	47.0029	47.0052	37.8752	58.2417	3.45906	9.73181	8.71006e-20	50.6291	50.7566	43.9021	57.2585	3.31944	47.7304	47.7431	41.6564	55.6146	3.01196	4.09007	0.000104867
ns_r_d_r	48.057	48.1211	38.8018	57.0799	3.06252	44.2507	44.4084	35.0461	55.4219	3.88264	9.94691	1.88676e-20	48.0318	48.0386	40.1733	54.8223	4.00704	44.9053	44.5778	38.0353	52.4261	3.66945	3.63927	0.000491366
ns_r_ec_l	71.6885	72.1121	63.2838	79.3055	2.8447	68.7807	68.7022	61.5999	76.9889	2.84149	9.34568	1.37894e-18	72.1872	72.1261	67.5405	77.8918	2.73871	68.9258	69.0121	64.6528	73.22	2.23694	5.83307	1.29311e-07
ns_r_ec_r	64.0216	64.0786	54.6372	72.0272	2.97842	61.3079	61.3162	53.8211	71.2201	3.02588	8.25937	3.52589e-15	64.8532	64.3385	59.2897	69.8699	2.63897	61.3657	61.4487	54.8202	66.3081	2.89134	5.63464	2.72421e-07
ns_r_ft_l	86.4342	86.848	72.6535	97.6603	3.92176	82.2013	82.3628	73.9319	92.1655	3.54165	10.3517	6.37135e-22	87.4104	87.2617	81.3137	95.5587	3.43031	82.986	82.5987	76.3958	91.9231	3.63671	5.59731	3.14267e-07
ns_r_ft_r	80.432	80.6536	67.8394	91.6821	3.83871	75.7191	75.7668	65.6281	88.3986	4.30406	10.5604	1.24241e-22	81.0855	80.7772	72.926	89.4594	3.29651	76.4641	75.2016	67.502	89.1329	4.65051	5.12744	2.48176e-06
ns_r_ftm_l	78.8514	79.1569	68.944	87.6775	3.20183	75.6488	75.5779	67.6826	84.9415	3.0599	9.34478	1.40052e-18	79.1769	78.9603	74.343	87.016	2.78356	75.4759	75.3738	69.91	80.6921	2.66937	6.06927	4.3781e-08
ns_r_ftm_r	71.8127	71.9849	60.6684	81.0922	3.29352	68.6087	68.8629	58.5732	77.7933	3.25279	8.94455	2.6733e-17	72.226	71.4494	67.8505	79.4657	2.91672	68.7158	68.7328	62.0505	74.5295	3.05566	5.25544	1.25563e-06
ns_r_l	191.49	190.623	171.271	210.402	8.33814	183.535	183.155	162.554	203.849	7.53615	9.1472	6.28264e-18	191.802	190.974	181.198	210.094	7.147	183.856	184.05	166.187	197.798	7.88874	4.72132	1.0268e-05
ns_r_ms_l	119.006	118.832	101.691	132.129	5.1138	112.526	112.647	94.3727	130.751	4.68117	12.0786	4.67191e-28	119.447	118.839	112.462	130.058	4.17028	111.559	112.086	103.327	121.961	4.83359	7.81465	2.42405e-11
ns_r_ms_r	114.86	115.224	100.419	128.282	4.77044	108.148	108.439	92.9116	122.91	4.72354	12.9204	3.2382e-31	116.059	115.735	97.2933	126.844	5.30856	107.51	106.366	98.1724	119.28	5.15169	7.3091	2.03104e-10
ns_r_orb_d_l	44.242	44.1977	38.0836	50.4691	2.39547	42.384	42.4558	37.1748	48.4727	2.2917	7.243	3.09472e-12	44.3394	43.9527	39.6145	51.0702	2.31634	42.43	42.186	37.4445	47.5609	2.2147	3.76819	0.00031812
ns_r_orb_d_r	36.1731	36.3132	28.394	41.217	2.50265	34.0215	34.1084	27.2513	41.1126	2.47333	7.90237	4.069e-14	36.2363	36.1086	33.1014	40.6108	2.04208	34.0825	33.7956	29.1568	38.8355	2.51581	4.20394	7.18285e-05
ns_r_orb_u_l	67.625	67.8288	57.0048	74.9467	2.99411	65.3904	65.3016	58.0282	73.4994	2.80072	7.04356	1.09284e-11	68.154	68.2402	63.5538	73.5341	2.74391	65.5376	65.1997	59.4582	71.0105	2.64119	4.3449	4.1589e-05
ns_r_orb_u_r	62.8659	63.082	52.3365	71.3304	3.05425	60.4381	60.4174	53.3068	69.092	3.08975	7.22151	3.53675e-12	63.2739	63.3672	56.5047	69.2549	2.79666	60.842	60.9088	56.9993	66.0615	2.48507	4.11112	9.76653e-05
ns_r_po_l	113.525	113.537	102.14	125.236	4.73093	108.358	108.759	95.8661	117.697	3.85356	10.944	7.01825e-24	113.997	114.228	104.387	122.382	3.75285	108.091	108.527	96.8326	115.641	3.87295	6.92611	1.09293e-09
ns_r_po_r	109.488	109.787	97.4659	121.258	4.48492	104.318	104.441	91.7691	114.03	4.07024	11.0304	2.77758e-24	109.844	109.867	93.8757	117.6	4.31997	103.622	104.854	94.7874	109.715	3.89262	6.76761	2.26319e-09
ns_r_zma_l	56.8791	56.8711	45.3615	68.1685	3.40182	54.1897	54.3467	47.2475	62.3908	2.87106	7.80746	8.2198e-14	57.2916	57.1165	51.9716	63.0073	2.53118	53.8531	54.0079	47.1418	58.6288	2.70166	5.87409	1.00038e-07
ns_r_zma_r	47.8983	48.0138	37.2138	57.4639	3.50865	45.3548	45.3628	36.732	55.5241	3.34434	6.78097	5.49214e-11	48.0624	47.5924	41.8623	56.4405	3.79521	45.4269	45.8465	37.9663	55.2506	3.80575	3.1013	0.00268169
ns_r_zo_l	41.9429	41.9283	33.0948	49.7051	2.8876	40.2769	40.1172	32.8892	48.6676	2.93249	5.23111	2.99082e-07	42.7344	42.1082	37.0474	50.0586	3.29426	40.169	40.3321	33.942	44.0396	2.45593	3.94873	0.000180845
ns_r_zo_r	33.813	33.8979	24.783	40.2061	2.67721	31.574	31.5398	23.9923	39.3722	2.76173	7.52221	5.09861e-13	33.6147	33.4298	28.5063	37.6972	1.86029	32.2118	32.097	25.9518	37.5033	2.87126	2.59344	0.0116639
o_al_l	127.506	127.098	114.039	140.403	5.66792	121.54	121.486	108.607	135.405	5.01177	10.1915	2.30148e-21	128.418	127.473	111.329	140.955	5.62731	121.304	121.536	112.501	133.273	5.50367	5.71608	1.91315e-07
o_al_r	127.539	127.162	113.937	140.869	5.74511	121.791	121.992	106.873	136.155	5.01924	9.7369	7.80351e-20	128.44	127.32	111.412	140.068	5.74438	121.674	120.724	113.91	133.341	5.12707	5.55703	3.78048e-07
o_alv	80.1432	80.191	69.078	90.4012	4.43284	76.9834	77.0427	67.4913	86.8202	3.95226	6.87574	3.12742e-11	80.6657	80.4934	68.702	92.4769	5.11225	77.0054	77.4498	69.6697	86.6634	4.11245	3.52837	0.000719872
o_b	155.942	156.047	144.515	167.807	5.21653	149.774	149.95	134.417	172.75	5.4106	10.605	8.0756e-23	156.571	157.025	142.474	167.529	5.64969	149.538	149.103	140.373	160.294	4.95456	5.9194	8.54885e-08
o_d_l	130.445	130.828	117.127	144.246	5.26064	123.968	123.949	113.23	144.339	5.16101	11.3572	1.78772e-25	131.159	130.779	119.553	144.31	5.75614	124.597	125.157	116.356	137.096	5.60503	5.16521	1.79595e-06
o_d_r	130.25	130.441	117.47	143.127	5.36471	124.01	123.698	112.497	143.85	5.12032	10.8738	9.37006e-24	130.939	131.362	119.199	142.404	5.98983	124.376	125.028	115.39	136.593	5.96572	4.91047	4.89116e-06
o_ec_l	128.238	128.455	115.768	138.909	4.69345	122.211	122.1	112.839	141.765	4.31188	12.2198	1.40879e-28	128.527	128.775	121.045	137.922	4.40268	122.444	122.059	114.29	131.372	4.08746	6.40324	1.06875e-08
o_ec_r	127.628	127.846	115.292	138.26	4.64807	122.169	122.302	111.689	137.392	4.27381	11.1719	8.62067e-25	128.344	128.696	117.826	138.184	4.74274	122.285	121.654	112.483	132.032	4.07791	6.12655	3.64098e-08
o_foram_l	23.509	23.3575	16.4998	29.7065	2.55959	22.8488	22.8661	16.6241	29.6227	2.214	2.5211	0.0121764	23.3756	22.8565	19.2141	29.0935	2.75726	22.7454	22.5741	18.0555	26.7933	2.166	1.13679	0.259302
o_foram_r	23.7624	23.7201	17.4777	31.2259	2.42089	23.2709	22.9619	17.5645	29.8512	2.26687	1.91517	0.0563335	23.9733	23.9044	18.0827	29.8903	2.41554	23.204	22.9479	18.526	28.0733	2.05788	1.53314	0.12939
o_ft_l	135.401	135.162	116.793	149.259	5.90501	129.237	128.814	120.039	148.388	4.71798	10.5392	1.84544e-22	135.974	136.168	123.89	146.735	4.77297	129.881	128.843	123.155	145.046	4.99893	5.57535	3.42983e-07
o_ft_r	135.012	135.197	116.657	149.829	5.63092	129.011	128.448	116.798	145.615	4.72811	10.5477	1.53241e-22	135.802	136.366	124.445	146.378	4.42182	129.648	128.655	116.928	145.299	5.49516	5.51849	4.72863e-07
o_ftm_l	133.495	133.971	121.997	145.586	4.98221	127.644	127.407	117.791	147.202	4.61921	11.1274	1.22775e-24	133.724	133.291	125.627	145.554	5.22546	127.541	126.953	120.325	137.73	4.31762	5.7692	1.66515e-07
o_ftm_r	133.197	133.415	122.13	145.373	4.8664	127.612	127.759	116.801	140.286	4.43249	10.9644	4.71847e-24	133.591	133.258	122.089	145.28	5.30705	127.836	127.402	116.936	139.062	4.48649	5.23749	1.40994e-06
o_l	97.5991	97.7957	82.5194	114.708	6.35107	95.1512	94.9673	78.5246	115.469	6.49721	3.48171	0.00056489	98.0025	96.9804	85.5251	114.903	6.69396	95.7584	96.0552	81.0204	114.391	5.97684	1.58154	0.117854
o_ms_l	62.1727	62.2131	54.0917	72.1419	3.27786	58.2876	58.2162	51.7012	64.7157	2.76971	11.6993	1.34019e-26	62.2147	61.7983	55.9859	72.22	3.35716	59.3016	59.281	54.2587	68.9303	3.21007	3.96651	0.000160983
o_ms_r	62.4198	62.7163	51.4252	73.15	3.28699	59.1025	59.1814	52.2099	69.7004	3.05261	9.55632	2.89595e-19	63.2205	62.9792	53.992	70.647	3.30717	59.652	59.3362	54.8858	65.362	2.31273	5.59248	4.06608e-07
o_ns_l	128.1	127.954	113.706	142.673	5.79452	122.045	122.218	107.105	136.42	5.36075	9.91298	1.9033e-20	129.023	128.546	108.427	142.259	6.33947	121.785	122.287	112.949	134.807	5.70974	5.36541	8.19738e-07
o_ns_r	128.397	127.93	114.011	143.375	5.89149	122.201	122.611	106.809	136.168	5.38961	10.0271	7.9525e-21	129.199	127.768	109.083	142.098	6.44542	122.281	122.66	112.881	134.693	5.56019	5.1406	2.04883e-06
o_orb_d_l	125.914	126.222	112.171	137.62	5.34251	119.981	119.929	107.311	135.451	4.78561	10.6908	4.36774e-23	126.675	125.893	113.426	136.861	5.28446	120.32	119.093	113.297	133.019	5.40454	5.31735	9.76184e-07
o_orb_d_r	125.943	126.152	112.967	137.751	5.39164	120.195	119.933	106.662	133.949	4.78727	10.3032	9.54038e-22	126.739	126.661	113.588	136.156	5.34454	120.447	120.692	112.701	134.189	5.02361	5.42533	6.34757e-07
o_orb_u_l	141.471	141.362	128.506	151.917	5.04003	135.047	134.969	123.941	154.744	4.62902	12.1312	2.97942e-28	142.249	141.223	132.864	153.091	5.15406	134.982	134.577	128.353	147.893	4.88417	6.47261	7.86809e-09
o_orb_u_r	141.417	141.28	128.372	152.334	5.05524	135.284	135.411	123.842	152.703	4.59974	11.5948	2.69376e-26	142.478	142.599	130.165	152.791	5.34417	135.389	134.74	125.893	149.031	4.95354	6.15301	3.10643e-08
o_po_l	74.7005	74.8182	63.4548	85.2605	4.05968	71.6545	71.4256	64.2122	81.0975	3.44641	7.39188	1.24772e-12	75.2477	76.2988	67.7758	83.0245	4.05917	72.2263	72.6123	64.867	80.1308	2.96651	3.80089	0.000300632
o_po_r	75.032	74.9536	65.4051	83.7363	3.68619	72.1944	72.1067	63.2843	82.7396	3.38366	7.32843	1.81004e-12	76.2317	75.7228	69.259	82.6936	3.9414	72.805	72.9545	67.0999	77.5431	2.62173	4.57824	2.05809e-05
o_zma_l	115.998	116.141	102.624	127.954	5.30572	111.131	111.163	100.816	123.429	4.68815	8.88335	4.40617e-17	116.845	116.876	104.845	126.978	4.90339	110.971	110.482	103.166	120.285	4.59484	5.52865	4.17066e-07
o_zma_r	115.494	115.267	102.037	129.916	5.29963	111.06	110.954	98.4703	122.927	4.60238	8.16432	7.1735e-15	116.809	116.94	104.209	125.605	4.82492	110.919	110.008	101.587	119.005	3.98268	5.95408	7.76117e-08
o_zo_l	126.045	126.351	112.914	137.572	5.3779	120.321	120.151	107.62	135.86	4.85755	10.2073	1.98012e-21	126.768	126.056	114.007	136.93	5.22559	120.483	119.513	112.914	132.788	5.44083	5.26929	1.18667e-06
o_zo_r	126.033	126.521	112.123	138.847	5.32416	120.425	120.518	106.787	134.082	4.7952	10.113	4.14734e-21	127.1	126.547	114.816	137.145	5.33057	120.635	120.827	112.723	133.772	5.03788	5.57429	3.45236e-07
op_al_l	184.059	183.901	161.629	206.14	8.68769	176.164	175.509	156.03	199.18	7.39535	8.94306	2.96722e-17	184.4	183.191	174.343	205.124	6.74465	175.434	174.599	156.808	190.561	8.39493	5.26578	1.3015e-06
op_al_r	184.064	183.696	160.987	205.862	8.83685	176.407	175.72	155.557	198.604	7.42947	8.5704	4.34648e-16	184.428	183.301	173.532	205.929	7.16749	175.714	174.413	157.455	189.898	8.08718	5.09961	2.38151e-06
op_alv	144.002	143.958	122.558	166.016	8.15827	139.054	138.822	120.208	159.64	6.84061	6.00533	5.14934e-09	143.761	143.178	130.766	164.148	6.75111	137.991	138.665	119.797	153.64	7.55266	3.60261	0.000555926
op_ast_l	76.0953	76.0654	62.2287	91.0829	5.85149	75.1073	74.6733	60.8256	92.0289	5.78751	1.5513	0.121783	75.5102	75.5059	60.1694	96.24	6.82543	75.2282	75.4241	61.8534	89.5575	6.01071	0.196116	0.845037
op_ast_r	77.1836	77.5932	61.6541	96.4562	6.22976	76.0899	76.226	60.5386	89.6577	5.31378	1.72603	0.0852959	78.4547	77.5007	67.6367	96.4894	5.77363	75.4576	75.5281	63.1213	87.0271	5.44211	2.38909	0.0193148
op_b	136.996	136.898	111.251	159.5	8.47901	130.177	129.822	108.374	156.376	8.93917	7.15236	5.50541e-12	137.614	137.644	118.814	153.45	8.95588	132.239	132.911	106.492	153.675	10.3732	2.48023	0.0153314
op_ba	105.648	105.901	84.9557	125.347	7.64318	102.074	102.872	82.4543	122.041	7.12556	4.42012	1.33974e-05	105.383	104.578	95.8625	125.682	6.26843	100.897	101.087	80.7614	114.096	7.28926	2.95096	0.00420608
op_d_l	171.057	171.257	153.119	189.568	7.75525	163.83	163.469	147.4	194.341	7.18351	8.83483	6.05548e-17	171.172	169.3	160.887	189.625	6.82315	164.097	162.278	151.225	184.21	8.48949	4.10824	0.000101206
op_d_r	170.797	170.359	153.33	188.744	7.65909	163.996	163.913	148.495	193.353	7.03824	8.45012	9.47416e-16	170.991	170.004	161.028	189.836	6.80348	164.004	163.245	147.999	182.88	8.58084	4.03515	0.000131348
op_ec_l	168.311	168.693	150.027	186.842	7.41989	161.004	161.19	145.704	190.394	6.64069	9.48312	5.18852e-19	168.062	167.656	158.488	186.138	5.90081	161.126	160.935	148.046	176.608	7.32523	4.66357	1.33409e-05
op_ec_r	167.891	168.023	152.779	187.058	7.49982	160.98	161.156	145.047	184.749	6.43067	9.04076	1.44455e-17	168.032	166.537	158.59	186.569	6.30848	160.978	160.808	145.88	175.109	6.85297	4.78948	7.88165e-06
op_en_ba	103.997	104.124	82.812	124.027	7.67378	100.512	101.255	81.1865	120.665	7.13239	4.29929	2.2583e-05	103.895	103.371	94.5212	124.585	6.31382	99.414	99.5593	79.0242	112.964	7.25756	2.94638	0.00425874
op_eu_l	107.304	106.903	93.1022	119.802	5.20939	102.995	103.359	92.1035	147.833	5.8366	7.11721	6.98547e-12	108.337	109.16	95.0053	117.836	5.84997	103.461	103.15	94.5816	117.826	5.01754	4.00172	0.000144542
op_eu_r	108.08	108.006	93.9939	121.09	5.44317	104.182	104.098	92.2348	145.896	5.81392	6.3248	8.22829e-10	110.774	112.21	96.7601	119.943	5.86397	104.475	105.113	92.3699	119.619	5.27023	5.05284	2.84923e-06
op_foram_l	93.17	93.5936	70.4773	111.769	7.59355	91.0251	91.682	72.2658	110.412	7.29243	2.63284	0.00886395	92.5539	92.327	80.5539	110.494	6.38584	89.5867	89.8501	65.7996	107.401	8.02348	1.83007	0.071252
op_foram_r	92.9389	93.1331	70.4476	113.472	7.68605	90.7998	90.7736	71.8806	110.089	7.45259	2.58203	0.0102506	92.4509	91.9917	80.0294	111.346	6.21178	89.5295	89.2657	65.3405	106.873	8.02945	1.82003	0.0728324
op_ft_l	165.068	165.781	148.519	183.66	6.97001	158.308	158.337	142.303	185.446	6.30265	9.29674	2.07368e-18	164.778	165.093	156.61	175.907	5.03886	159.001	158.041	146.772	177.387	7.18236	4.16505	8.75668e-05
op_ft_r	164.881	165.49	147.292	183.271	6.95007	158.395	158.219	144.035	181.026	6.00476	9.12469	7.74281e-18	165.069	164.777	154.439	175.973	5.62548	158.951	157.536	148.12	178.131	7.00031	4.30899	4.94161e-05
op_ftm_l	169.562	169.756	152.399	188.032	7.13993	162.309	162.109	147.411	193.278	6.66157	9.59829	2.10081e-19	169.357	169.601	159.592	185.94	5.90293	162.403	161.687	150.768	177.647	7.18767	4.72867	1.03387e-05
op_ftm_r	169.356	169.236	154.824	189.104	7.20185	162.357	162.461	147.638	185.12	6.26944	9.4719	5.81881e-19	169.362	167.961	161.526	186.556	6.30717	162.596	161.64	151.268	178.39	6.66178	4.66432	1.26511e-05
op_l	25.4281	24.4534	5.16314	56.3216	9.49237	23.6749	22.9619	2.95758	57.9364	9.64778	1.67399	0.095075	26.7382	26.1997	5.29287	52.6844	11.0365	27.5732	27.897	3.39202	54.8332	11.398	-0.332827	0.740158
op_ms_l	116.395	116.672	99.1635	134.787	7.18129	111.12	111.057	94.0035	129.655	6.85935	6.86456	3.29608e-11	116.115	116.067	99.425	133.238	6.66311	111.276	110.804	93.0166	128.829	7.65888	3.01523	0.00348286
op_ms_r	116.615	117.276	98.2792	140.689	7.40718	111.546	111.15	95.0545	129.981	6.84929	6.49305	3.09075e-10	116.643	116.124	100.807	133.41	6.78298	111.157	111.728	91.0933	127.434	7.48469	3.43451	0.000957658
op_n	182.074	181.579	165.376	202.912	8.2775	173.206	172.685	155.951	202.669	7.24227	10.4189	3.92336e-22	182.629	180.911	171.786	202.371	7.13988	173.406	171.437	158.9	192.737	8.55863	5.23335	1.44429e-06
op_ns_l	187.811	187.643	165.102	207.409	8.837	179.994	179.482	159.51	201.356	7.62452	8.65502	2.32268e-16	188.004	186.897	178.348	208.092	7.21438	179.052	178.637	157.957	196.059	8.67224	5.01894	3.36338e-06
op_ns_r	188.006	187.675	164.162	207.527	9.06844	180.16	180.137	158.832	201.196	7.71321	8.51609	6.30308e-16	188.164	186.509	177.608	208.636	7.31091	179.544	179.569	158.204	193.771	8.58857	4.83343	6.82286e-06
op_o	80.2573	80.657	56.9666	101.752	8.16549	78.9622	79.0588	60.1668	99.7491	7.69605	1.4915	0.136783	79.6349	79.9419	65.326	103.233	7.59446	76.8982	75.8396	52.4735	94.0738	8.44952	1.5235	0.131724
op_op_n	5.69021	5.56898	2.79165	9.65797	1.24956	5.65713	5.32505	2.47543	14.5206	1.87447	0.189808	0.849593	5.90069	5.6581	3.65811	9.23106	1.22955	5.85435	5.46951	2.7854	13.6854	2.30741	0.11211	0.911114
op_orb_d_l	175.736	175.232	156.701	196.122	8.15025	168.607	168.063	151.217	195.116	6.94977	8.60115	3.44551e-16	175.964	174.632	164.772	196.834	6.64471	168.497	167.308	150.984	184.785	8.2326	4.46411	2.80064e-05
op_orb_d_r	175.755	175.301	157.838	197.145	8.25602	168.856	168.184	150.096	192.135	6.90209	8.28414	3.24154e-15	176.121	174.415	165.561	197.488	6.98404	168.625	168.741	150.117	183.696	7.89733	4.49668	2.40739e-05
op_orb_u_l	177.104	176.577	159.862	196.364	7.76165	169.048	168.372	152.05	199.421	7.07007	9.9151	1.89837e-20	177.21	176.319	167.838	192.778	6.47005	169.124	168.009	156.456	188.229	8.09946	4.93368	4.78907e-06
op_orb_u_r	177.058	176.837	160.737	195.994	7.89633	169.358	168.97	154.38	196.561	6.9266	9.47308	5.71605e-19	177.554	176.005	168.667	195.967	6.91761	169.484	168.439	157.4	188.474	7.74576	4.9149	4.89422e-06
op_po_l	112.569	112.86	97.2388	127.689	6.56275	108.92	108.943	94.338	122.439	5.57973	5.47505	8.78818e-08	112.178	112.879	99.104	129.171	6.16172	108.775	107.925	93.0384	119.338	5.95935	2.51083	0.0141154
op_po_r	112.462	113.161	95.7033	132.296	6.6531	108.917	109.048	97.7053	120.115	5.23561	5.41033	1.24828e-07	113.027	112.457	103.983	129.963	6.08105	108.786	108.636	93.3499	117.841	5.66687	3.22693	0.0018334
op_ra_l	119.497	119.512	106.144	136.142	6.0953	116.84	116.455	99.2756	133.684	6.4551	3.8669	0.000132708	119.066	118.578	107.637	135.669	5.57743	116.556	115.566	98.9501	134.063	6.63911	1.83109	0.0710195
op_ra_r	120.595	120.786	102.724	138.89	6.19284	117.531	117.561	102.147	133.941	6.12781	4.54388	7.7435e-06	121.546	120.384	111.411	141.005	5.67197	117.327	116.423	102.612	135.692	6.38291	3.12437	0.00251269
op_zma_l	172.378	172.408	153.03	190.737	8.11587	165.594	165.391	148.049	188.892	6.85686	8.25149	4.02292e-15	172.622	172.692	161.694	190.358	6.01988	164.818	164.97	148.055	180.375	7.53007	5.12007	2.31936e-06
op_zma_r	172.029	172.285	151.33	192.445	8.12331	165.588	165.824	147.081	183.322	6.89975	7.81013	8.0366e-14	172.839	172.008	163.918	191.369	6.18243	164.805	165.007	146.837	178.48	6.97007	5.45385	5.76993e-07
op_zo_l	175.959	175.861	158.341	195.203	8.108	169.309	168.751	151.682	195.863	6.91211	8.06652	1.42125e-14	176.206	174.975	165.308	195.264	6.39364	169.06	167.703	152.902	185.559	8.38134	4.28732	5.45746e-05
op_zo_r	175.834	175.316	158.295	196.471	8.13636	169.344	169.101	150.909	192.573	6.98029	7.82323	7.31167e-14	176.554	174.283	166.538	196.7	6.84652	169.125	169.029	150.426	184.101	7.97013	4.47134	2.66631e-05
op_zy_l	143.677	143.882	124.107	163.282	6.85676	137.692	137.517	120.282	160.708	6.5031	8.18439	5.96873e-15	143.187	143.069	133.383	158.569	5.72423	136.77	136.878	121.115	154.711	8.04886	4.10884	0.000105919
op_zy_r	143.281	143.303	125.302	163.169	7.13911	137.953	138	122.366	159.642	6.30528	7.22905	3.46187e-12	143.671	143.523	134.839	159.032	5.54935	137.424	137.26	124.301	154.558	7.34565	4.29125	5.40435e-05
op_n_al_l	182.517	182.352	159.083	204.48	8.77101	174.811	174.034	154.486	196.535	7.41203	8.67107	2.11549e-16	182.89	181.866	173.232	204.37	6.79643	173.9	173.113	155.187	189.636	8.3337	5.28758	1.18121e-06
op_n_al_r	182.523	181.896	158.52	204.24	8.91418	175.059	174.273	154.02	197.084	7.44515	8.30543	2.7994e-15	182.918	181.917	171.694	205.198	7.22258	174.187	173.335	155.833	188.984	8.04773	5.10682	2.30433e-06
op_n_alv	141.629	141.562	119.45	163.854	8.25102	136.88	136.985	118.097	157.939	6.91312	5.70149	2.68643e-08	141.402	140.595	128.384	162.793	6.89094	135.632	135.899	117.573	152.375	7.69324	3.53326	0.000697293
op_n_ast_l	74.0811	74.1185	60.643	88.5603	5.67729	73.1353	72.6628	58.7169	90.7288	5.66483	1.52404	0.128449	73.4938	73.8704	59.0902	94.4055	6.6727	73.3159	73.42	60.4543	88.1975	5.89919	0.126329	0.899801
op_n_ast_r	75.1762	75.3922	59.3332	93.4273	6.02665	74.1578	74.2874	58.2161	86.6527	5.0804	1.6695	0.095988	76.4296	75.1274	66.8263	94.6736	5.70794	73.559	73.3888	61.787	85.5683	5.33636	2.32344	0.0227738
op_n_b	140.376	140.432	115.519	162.566	8.40939	133.656	133.869	111.796	159.5	8.87892	7.10103	7.60739e-12	141.185	140.716	123.026	157.311	8.65686	135.685	136.644	110.7	155.961	10.3084	2.58428	0.0116823
op_n_ba	102.61	103.196	81.436	122.488	7.72412	99.2428	99.8823	78.2693	119.381	7.26906	4.1019	5.16397e-05	102.302	102.485	92.771	123.615	6.40113	97.8594	98.6904	78.5331	112.07	7.46116	2.85842	0.00548733
op_n_d_l	170.66	170.611	153.204	189.402	7.76513	163.562	163.155	146.949	192.876	7.12536	8.70374	1.56454e-16	170.855	169.358	159.636	189.806	6.79529	163.714	162.278	150.99	183.517	8.38495	4.18468	7.69779e-05
op_n_d_r	170.4	170.311	153.421	189.281	7.679	163.719	163.339	148.035	191.924	6.98942	8.31452	2.46132e-15	170.664	169.277	161.02	190.089	6.70106	163.614	162.981	147.811	182.23	8.4983	4.1199	9.77521e-05
op_n_ec_l	167.726	167.971	149.994	185.918	7.39393	160.566	160.618	144.543	188.801	6.58694	9.34489	1.46807e-18	167.537	167.296	159.3	186.077	5.83465	160.564	160.074	147.753	175.722	7.21076	4.7547	9.43342e-06
op_n_ec_r	167.285	167.489	151.761	186.204	7.4846	160.538	160.491	144.224	183.234	6.39055	8.85969	5.40769e-17	167.492	165.768	158.518	186.513	6.26352	160.404	160.293	145.579	174.286	6.74453	4.87009	5.76477e-06
op_n_en_ba	100.949	101.389	79.2999	121.369	7.75676	97.6717	98.3905	77.0616	117.997	7.26328	3.98523	8.29861e-05	100.806	101.023	91.469	122.499	6.44257	96.3715	97.4073	76.8504	110.828	7.43829	2.84997	0.00561696
op_n_eu_l	108.168	107.776	92.6072	122.196	5.35187	103.847	104.231	92.6345	148.499	5.84983	7.04351	1.09922e-11	109.313	110.45	95.2637	118.385	6.01117	104.299	104.235	95.2482	118.225	5.0895	4.02603	0.000133158
op_n_eu_r	108.936	108.923	94.9978	122.603	5.5918	105.034	105.082	93.2891	146.593	5.83165	6.24066	1.33101e-09	111.737	113.183	97.0274	120.995	6.05533	105.326	105.79	93.0681	120.007	5.24973	5.05927	2.81612e-06
op_n_foram_l	89.4447	89.5754	66.1176	107.564	7.70244	87.4869	87.4316	67.0864	107.282	7.48679	2.3553	0.0190895	88.7543	88.5938	77.1689	107.783	6.58673	85.8238	85.684	62.5089	104.635	8.3078	1.74818	0.0845726
op_n_foram_r	89.2279	89.7859	65.9899	109.225	7.79996	87.2773	87.3301	66.4718	106.941	7.62824	2.31049	0.0214737	88.6666	88.6955	76.6737	108.631	6.40445	85.7917	85.4296	62.0842	104.085	8.3255	1.73104	0.0876592
op_n_ft_l	165.224	165.713	147.988	183.308	6.94867	158.572	158.498	142.658	184.703	6.20156	9.2298	3.4486e-18	165.054	165.293	157.154	176.426	5.0055	159.213	158.111	147.294	177.277	7.08111	4.25955	6.24974e-05
op_n_ft_r	165.017	165.479	147.606	182.989	6.9197	158.632	158.48	144.852	180.401	5.90992	9.06622	1.20463e-17	165.305	165.038	153.623	175.961	5.5092	159.135	157.717	148.135	178.059	6.91081	4.41564	3.36334e-05
op_n_ftm_l	169.261	169.367	152.656	187.361	7.12201	162.173	161.996	146.659	191.898	6.59279	9.438	7.08225e-19	169.121	168.951	160.006	186.177	5.86373	162.147	161.1	150.769	176.938	7.07286	4.80047	7.83173e-06
op_n_ftm_r	169.043	168.847	154.816	188.482	7.19321	162.212	162.247	146.804	183.782	6.21747	9.28473	2.37316e-18	169.108	167.485	160.912	186.799	6.27165	162.345	161.665	151.364	177.87	6.54993	4.71617	1.03711e-05
op_n_l	30.9189	29.592	9.88517	61.3127	9.60883	29.1374	28.0136	6.57563	65.057	9.84604	1.67344	0.0951838	32.433	31.668	10.163	59.9808	11.1472	33.2286	32.7256	6.6465	59.6484	11.5638	-0.313264	0.754918
op_n_ms_l	113.186	113.398	95.7437	131.918	7.25244	108.109	108.034	91.6368	127.756	6.99202	6.51284	2.73453e-10	112.844	112.925	97.0909	130.884	6.80519	108.109	107.554	90.1738	127.024	7.7945	2.89408	0.00495048
op_n_ms_r	113.376	113.781	94.6315	137.031	7.51712	108.539	108.276	92.6051	128.029	6.94599	6.10787	2.8399e-09	113.359	112.773	95.7276	131.231	7.0099	107.993	108.39	88.4823	125.55	7.59244	3.28373	0.00153871
op_n_ns_l	186.034	186.029	162.204	206.254	8.92333	178.405	178.157	157.389	200.311	7.64279	8.39144	1.50234e-15	186.264	185.247	176.339	207.168	7.30342	177.267	176.7	156.119	195.007	8.68955	5.01255	3.43007e-06
op_n_ns_r	186.238	186.104	161.28	205.867	9.15264	178.571	178.235	156.756	200.145	7.73046	8.2703	3.53327e-15	186.425	184.62	175.42	207.73	7.4414	177.763	177.473	156.309	192.695	8.59081	4.82008	7.13301e-06
op_n_o	75.9045	76.1812	51.6727	97.1127	8.38324	74.7589	74.9476	54.7951	96.1784	7.95556	1.28102	0.201085	75.1782	74.9159	61.0058	99.9849	7.83392	72.484	72.1543	48.3522	90.7999	8.81546	1.44481	0.152571
op_n_orb_d_l	174.607	174.302	156.201	194.85	8.18614	167.625	166.899	149.475	192.814	6.9545	8.40002	1.42541e-15	174.881	174.168	164.933	196.411	6.62864	167.355	166.187	149.978	183.456	8.19189	4.51658	2.30479e-05
op_n_orb_d_r	174.629	174.382	156.19	195.922	8.30675	167.877	167.331	148.86	189.897	6.91355	8.07292	1.38867e-14	175.033	173.46	164.926	197.117	6.96556	167.488	167.448	149.121	182.311	7.86834	4.54089	2.04103e-05
op_n_orb_u_l	177.06	176.748	160.289	195.845	7.72265	169.177	168.414	152.661	198.346	6.96431	9.79723	4.7435e-20	177.267	176.357	167.34	193.185	6.33787	169.137	167.934	156.949	187.787	7.94326	5.05999	2.93685e-06
op_n_orb_u_r	177.014	176.574	161.061	195.516	7.85219	169.486	169.237	154.671	195.543	6.8295	9.34826	1.46876e-18	177.602	175.881	168.357	196.424	6.79388	169.506	168.864	157.965	188.111	7.58786	5.02742	3.15223e-06
op_n_po_l	110.764	111.362	95.4917	126.158	6.60931	107.22	107.292	92.4144	121.326	5.68218	5.25516	2.68448e-07	110.429	111.85	97.6092	127.987	6.19508	107.01	106.661	91.1036	118.233	6.01594	2.50377	0.0143778
op_n_po_r	110.648	111.205	94.0422	129.842	6.67425	107.211	107.524	95.2083	119.01	5.30363	5.21085	3.40029e-07	111.258	110.773	101.528	128.81	6.14114	107.039	107.152	92.232	116.164	5.69907	3.18445	0.00208869
op_n_ra_l	117.923	118.172	104.828	134.29	6.09093	115.382	115.172	97.1225	132.666	6.54182	3.6731	0.000279428	117.545	116.865	106.339	134.676	5.60227	115.019	113.715	97.2566	132.45	6.67332	1.83323	0.0706979
op_n_ra_r	119.023	119.168	102.135	136.713	6.16499	116.063	115.864	100.047	133.631	6.19834	4.37512	1.62724e-05	120.005	118.504	110.523	140.125	5.71814	115.795	115.442	101.617	134.115	6.3734	3.10914	0.00262873
op_n_zma_l	170.556	170.69	150.576	188.873	8.15616	163.985	163.525	145.361	185.946	6.91685	7.94087	3.34604e-14	170.824	170.568	160.363	189.233	6.11648	163.022	163.091	146.407	178.502	7.53705	5.08366	2.64922e-06
op_n_zma_r	170.193	170.485	149.481	190.66	8.17886	163.971	164.124	144.233	180.481	6.94524	7.49425	6.43563e-13	171.023	170.21	162.427	190.359	6.28248	162.997	163.292	145.187	176.623	7.00142	5.39616	7.2512e-07
op_n_zo_l	174.838	175.117	156.918	194.741	8.15204	168.319	168.028	150.481	193.529	6.92531	7.87602	5.1701e-14	175.121	174.337	165.447	194.901	6.35851	167.903	166.357	151.839	184.206	8.3439	4.35165	4.33007e-05
op_n_zo_r	174.728	174.487	156.583	195.245	8.19644	168.371	168.124	149.662	190.305	6.99392	7.62353	2.75715e-13	175.482	174.001	165.976	196.381	6.81454	167.977	167.868	149.421	182.72	7.93831	4.53729	2.08729e-05
op_n_zy_l	142.217	142.498	122.337	161.78	6.88187	136.359	135.794	119.019	158.237	6.4992	7.99764	2.1496e-14	141.75	141.851	131.735	157.728	5.6985	135.297	135.353	120.01	153.151	8.00372	4.1544	9.0265e-05
op_n_zy_r	141.799	141.917	123.435	161.764	7.17707	136.612	136.8	119.335	157.192	6.31117	7.01462	1.33371e-11	142.208	141.903	133.16	158.285	5.60699	135.963	136.117	122.318	153.095	7.34595	4.27427	5.71765e-05
orb_d_l_d_r	49.778	49.7784	43.2596	58.9213	2.94402	47.1644	47.3056	38.8836	55.6293	2.83489	8.26399	3.42577e-15	50.4466	50.4611	43.0972	60.3768	3.68205	47.6328	48.0733	42.405	56.3536	3.00761	3.7432	0.000353753
orb_d_l_ec_r	84.2548	84.7562	73.356	90.8584	3.28058	81.463	81.499	74.258	91.1983	3.23492	7.83074	6.59199e-14	85.5947	85.8043	78.2393	96.5376	3.45767	81.5975	81.6165	75.3478	89.4584	3.28454	5.30106	1.04636e-06
orb_d_l_orb_d_r	61.9587	62.3782	54.7688	70.2122	2.85999	59.9681	59.864	53.3101	68.0467	2.90963	6.3049	9.18949e-10	62.7667	63.2642	56.2864	72.0477	3.10244	60.0194	60.1163	54.3603	68.4757	3.06163	3.98646	0.00014996
orb_d_l_orb_u_l	34.0818	33.9779	28.9191	39.4586	2.2754	33.666	33.7504	27.0875	39.7053	2.22896	1.68691	0.0925604	34.6335	34.5946	29.5652	39.1992	2.41395	33.6576	33.3941	29.1225	37.2037	1.78027	2.0578	0.0432443
orb_d_l_orb_u_r	70.9575	70.9242	63.4087	78.8577	2.98627	68.9552	68.8954	61.3732	77.121	3.03843	6.07372	3.42113e-09	71.8315	72.3824	64.7852	79.8918	3.1656	69.1648	69.1417	63.5476	78.1334	2.95688	3.89355	0.000207671
orb_d_r_orb_u_r	33.9048	33.9666	27.7519	39.8598	2.1955	33.5985	33.6917	25.7668	39.5153	2.28775	1.24838	0.212772	34.6144	34.6116	29.022	39.723	2.51698	33.7623	33.5734	30.578	38.2533	1.86401	1.7205	0.0896432
orb_u_l_d_r	45.259	45.3146	39.0293	54.2859	2.59295	43.7446	43.585	38.3306	51.4183	2.43334	5.50369	7.46896e-08	46.1528	46.1733	40.7132	55.8766	2.897	43.7489	43.9715	38.5581	50.5395	2.70465	3.8362	0.000252856
orb_u_l_ec_r	84.752	85.2924	73.7249	91.7592	3.3461	81.8392	81.8972	74.6311	92.3497	3.20718	8.12158	9.17546e-15	86.2157	86.297	80.1824	98.0347	3.48042	81.9198	82.2561	75.5208	90.571	3.33783	5.63419	2.69076e-07
orb_u_l_orb_d_r	70.4274	70.6564	62.3614	77.8185	2.94657	68.6346	68.6561	61.475	77.0129	3.07418	5.4407	1.03328e-07	71.5966	72.6565	63.7843	79.6932	3.22779	68.5998	68.8405	61.955	77.1512	3.07354	4.25234	5.83115e-05
orb_u_l_orb_u_r	61.9603	62.3604	54.9971	70.4262	2.86518	60.009	59.8492	53.3127	68.2513	2.93743	6.14525	2.28763e-09	62.7829	63.2687	56.3789	72.0397	3.04793	60.0829	60.2839	54.0955	68.1964	3.12827	3.90987	0.000195778
po_l_d_l	98.2427	98.1848	88.7768	108.009	3.97893	93.577	93.7361	83.9537	105.201	3.73562	11.0475	2.32233e-24	98.2661	98.0511	91.6731	104.838	3.55734	93.5955	93.6457	83.8477	101.733	4.10849	5.43549	6.29081e-07
po_l_d_r	112.306	112.657	102.016	121.917	4.57444	107.011	107.439	97.1603	117.348	3.67911	11.657	2.22888e-26	112.715	112.727	102.78	125.628	4.61866	106.953	107.497	97.617	115.838	4.32917	5.75698	1.62855e-07
po_l_ec_l	74.9012	75.0884	67.2111	83.1332	3.58063	71.0771	70.7772	63.2455	82.8103	3.2376	10.2371	1.56615e-21	74.3413	74.5118	67.4428	79.926	2.80562	70.5882	70.8852	65.2106	76.0932	3.03981	5.73807	1.77038e-07
po_l_ec_r	132.557	132.777	118.279	141.668	4.57526	127.27	126.849	117.755	139.337	3.82237	11.459	1.00237e-25	133.369	133.387	125.565	147.729	4.76482	127.204	127.362	117.324	133.674	3.77955	6.41121	1.19652e-08
po_l_ms_l	32.2347	32.4224	22.6906	45.2857	3.67914	28.7223	28.3942	20.4405	36.7937	3.07154	9.47059	6.22482e-19	33.2336	34.0362	21.5139	38.8972	3.49073	29.422	29.6483	22.3314	35.313	2.9459	5.27765	1.20275e-06
po_l_ms_r	120.231	120.636	105.422	132.806	4.78991	113.867	113.142	103.143	127.977	4.53095	12.4735	1.55988e-29	121.565	121.265	112.737	131.612	5.08276	114.41	113.872	108.495	122.799	3.66254	7.22413	4.58038e-10
po_l_orb_d_l	86.4323	86.108	74.1281	96.0262	4.20057	82.1914	82.1731	73.338	91.9084	3.51694	10.0035	1.07986e-20	86.6772	86.9798	79.863	92.8471	2.90592	81.9697	82.1649	70.9393	91.5884	4.06062	5.9625	8.8962e-08
po_l_orb_d_r	121.798	122.054	108.401	130.99	4.55568	116.797	116.648	107.278	127.929	3.72242	10.9856	4.98114e-24	122.492	122.857	114.155	134.637	4.34223	116.681	117.093	105.196	124.328	4.04227	6.19471	2.59818e-08
po_l_orb_u_l	98.0009	97.9531	85.7377	106.282	3.88807	93.2619	93.3552	85.8164	104.239	3.26941	12.0553	7.02674e-28	97.9614	98.0825	90.0424	106.284	3.15941	92.5917	92.6199	85.9856	98.7756	3.44657	7.2635	2.56044e-10
po_l_orb_u_r	130.254	130.752	117.774	139.241	4.50551	124.915	124.77	115.233	136.014	3.68647	11.8526	4.17164e-27	130.876	131.237	122.172	144.356	4.43822	124.666	125.047	115.327	131.677	3.98204	6.58711	4.95209e-09
po_l_po_r	120.091	120.203	102.612	138.857	6.08054	115.641	115.103	104.504	131.097	5.36877	7.08952	8.34481e-12	121.016	120.391	110.465	133.184	6.26893	115.859	115.298	108.726	126.327	4.23031	4.31226	5.31513e-05
po_r_d_l	113.754	113.811	102.373	124.134	4.22172	108.538	108.33	98.792	123.188	3.87603	11.7606	6.69079e-27	114.166	114.235	103.531	126.888	4.59816	108.079	107.535	100.942	117.827	3.661	6.55013	6.61331e-09
po_r_d_r	99.2796	99.5938	89.082	107.417	3.993	95.1072	94.7819	85.5463	110.279	3.58394	10.0493	6.83207e-21	99.1666	99.1635	88.7804	106.569	3.98435	94.3079	94.4093	86.1971	101.168	3.72822	5.63162	2.73514e-07
po_r_ec_l	134.372	134.62	122.624	145.281	4.51069	128.796	128.524	119.295	142.778	4.20928	11.6806	1.2744e-26	134.994	134.564	126.199	147.523	4.5434	128.379	127.852	121.707	134.161	2.85311	7.799	6.27558e-11
po_r_ec_r	75.4147	75.0521	67.9038	83.376	3.47641	72.0504	71.9193	64.7388	84.2976	3.24466	9.14266	6.35819e-18	74.7337	75.5266	66.9452	81.8666	3.56745	71.0135	70.693	64.6988	75.8296	2.86584	5.14178	2.12316e-06
po_r_ms_r	32.214	32.7556	22.0273	41.5745	3.72147	28.5584	28.6503	21.2126	38.7422	3.21875	9.60115	2.2156e-19	33.2634	34.1643	24.0595	38.5525	3.45226	29.4889	29.3732	22.0857	34.4926	2.81651	5.35799	8.91795e-07
po_r_orb_d_l	123.533	123.889	111.41	134.019	4.45305	118.516	118.318	108.056	130.191	4.04916	10.7735	2.20495e-23	124.179	124.536	112.445	136.601	4.43721	118.085	117.442	109.989	127.756	3.53508	6.79336	2.34464e-09
po_r_orb_d_r	88.0086	87.9978	77.245	97.1812	4.01558	84.032	84.0881	76.1804	95.0855	3.4839	9.66644	1.34576e-19	87.9421	88.1666	77.6555	95.3225	3.76729	83.2635	83.3354	77.3881	90.6853	3.17759	6.00392	6.18617e-08
po_r_orb_u_l	131.719	132.106	120.849	141.445	4.40824	126.361	126.245	115.225	140.285	4.08447	11.5218	4.80494e-26	132.282	131.606	122.784	146.362	4.52797	125.493	125.071	118.701	133.658	3.34826	7.62485	7.77333e-11
po_r_orb_u_r	99.1668	99.4163	88.951	108.699	3.84772	94.8395	94.7222	86.4159	108.395	3.36582	10.9389	6.18992e-24	99.2357	99.439	90.7855	108.717	3.7111	93.7927	93.6431	88.7039	101.775	3.12084	7.09953	5.77497e-10
ra_l_al_l	99.6821	99.7629	85.0329	111.055	4.8183	92.416	92.4081	79.4913	104.374	4.67513	13.9862	2.91605e-35	100.219	99.7932	92.3236	108.685	3.45621	92.1294	91.8775	82.7045	101.777	4.93459	8.49237	2.30186e-12
ra_l_al_r	114.521	115.074	97.7582	124.552	4.71911	107.285	107.547	94.5414	119.259	4.23163	14.7534	3.85225e-38	115.06	115.062	107.357	124.012	3.60521	107.141	106.919	99.1725	115.807	4.51805	8.66527	6.8984e-13
ra_l_alv	79.434	79.9321	65.9981	86.6501	3.52054	74.2003	74.074	65.0492	83.5633	3.23478	14.1464	7.80189e-36	79.4451	79.1784	73.7745	87.1235	3.28666	73.87	73.7871	67.7531	80.9506	3.43676	7.41475	1.28038e-10
ra_l_ast_l	57.0001	56.9765	47.1709	74.6375	4.43149	55.0102	54.8997	44.4513	71.5702	4.68987	3.98535	8.29289e-05	56.5481	56.1237	49.92	65.3229	3.46131	54.6856	54.7151	42.4322	64.1893	4.99853	1.93741	0.0567653
ra_l_ast_r	137.126	137.407	123.24	152.007	4.6995	131.752	131.474	120.985	142.629	4.63723	10.5189	1.59279e-22	137.847	137.987	130.087	150.387	4.97919	131.62	130.838	125.189	139.327	3.90149	6.22676	2.63868e-08
ra_l_b	134.593	134.93	124.378	147.25	4.22179	129.081	129.428	112.009	142.548	4.27892	11.8504	2.95643e-27	134.387	134.257	124.845	143.54	4.74681	128.573	128.381	120.178	138.868	4.39066	5.68692	2.18559e-07
ra_l_ba	69.5221	69.502	59.2548	77.1958	3.0378	65.5645	65.6684	57.3825	74.7915	2.64546	12.6962	2.7812e-30	69.7583	68.9725	65.7044	76.5001	2.75647	65.831	66.2965	60.5907	72.9589	2.98171	6.1168	3.62508e-08
ra_l_d_l	95.5405	95.4506	81.3426	107.169	4.22872	88.8991	88.7852	78.2816	103.605	4.45692	13.9696	3.47605e-35	95.5324	95.0014	88.4434	103.719	3.63409	89.0555	89.0197	79.4998	97.9131	5.03544	6.5965	6.40973e-09
ra_l_d_r	111.225	111.063	96.4792	122.563	4.64869	103.959	104.465	94.1069	117.255	4.55928	14.422	6.04231e-37	111.604	111.17	102.836	126.105	4.73916	103.997	103.852	95.655	112.727	5.0396	6.95523	9.73208e-10
ra_l_ec_l	69.3672	69.4619	58.4121	81.2894	4.06085	63.669	63.8464	52.119	78.3573	4.27636	12.4867	1.38704e-29	68.8238	68.3522	61.2297	76.746	3.70611	63.4204	63.08	56.2619	70.4907	4.30937	6.01247	5.87532e-08
ra_l_ec_r	133.881	134.412	115.779	141.436	4.42128	126.825	126.859	117.894	136.568	3.79931	15.6414	1.70534e-41	134.65	134.951	126.446	149.822	4.83669	126.722	126.145	119.041	135.114	4.03008	7.96394	1.33837e-11
ra_l_en_ba	69.4348	69.4596	59.1385	77.2839	3.04042	65.5229	65.5535	57.3931	74.5809	2.63129	12.5724	8.14761e-30	69.6767	68.9628	65.6552	76.1141	2.75366	65.7954	66.3102	60.6409	72.9868	2.96329	6.06836	4.43845e-08
ra_l_foram_l	62.4251	62.5798	50.1543	71.0065	3.16218	59.5161	59.4061	51.526	69.7841	3.11914	8.46372	8.42858e-16	63.0089	62.8837	57.0481	68.8566	3.15681	60.1001	59.7552	53.2825	69.4957	3.27031	4.04742	0.000121165
ra_l_foram_r	90.0938	90.1312	78.4614	98.5644	3.44846	86.0212	86.2317	76.8967	94.0432	3.33208	10.9753	4.08921e-24	90.5422	90.2882	83.938	96.0421	2.93973	86.3414	86.2678	80.2344	94.2842	3.49803	5.81456	1.36219e-07
ra_l_ft_l	75.8287	75.8157	60.7027	87.1895	5.22688	70.0685	69.6219	59.7844	81.3332	4.48121	10.8118	1.79067e-23	75.5496	75.3704	66.0616	84.4885	4.13399	70.4163	69.7955	62.643	83.8246	4.47224	5.33083	9.34164e-07
ra_l_ft_r	137.426	137.829	118.467	147.266	4.80851	130.359	130.24	121.931	141.721	3.82237	14.8673	2.84738e-38	137.867	138.03	128.64	150.709	5.13742	130.543	130.226	122.144	138.637	4.26871	6.93451	1.20037e-09
ra_l_ftm_l	72.3038	72.2467	60.769	86.4949	4.10622	67.1752	67.0163	56.7907	82.0082	4.48229	10.9026	7.71815e-24	71.7229	71.335	64.1982	82.8013	4.39895	66.6668	67.4431	59.6589	73.8474	4.13184	5.29862	1.05912e-06
ra_l_ftm_r	138.738	139.277	119.509	146.316	4.43138	131.389	131.481	121.891	140.674	3.88612	16.112	2.1993e-43	139.174	139.477	131.184	154.582	5.0283	131.302	130.361	122.69	139.47	4.08679	7.68327	4.81485e-11
ra_l_l	124.384	124.065	110.589	139.447	5.50366	121.458	121.735	106.496	138.225	5.83762	4.71401	3.58447e-06	124.229	124.761	114.597	138.398	5.35645	121.789	121.389	108.116	136.558	6.03907	1.91194	0.0596087
ra_l_ms_l	38.103	38.4625	28.7383	53.7611	3.88721	35.2271	35.1108	26.7386	44.6852	3.41532	7.18228	4.66569e-12	38.8531	39.4675	27.953	44.7136	3.58504	35.412	34.9502	29.072	41.4622	3.03653	4.63221	1.46944e-05
ra_l_ms_r	126.984	127.269	111.546	137.516	4.31779	119.651	119.437	109.448	129.897	4.15763	15.8088	2.39006e-42	128.194	127.066	120.337	137.173	4.41971	119.944	119.392	114.679	127.42	3.40823	9.34947	3.99552e-14
ra_l_ns_l	106.382	106.708	91.7764	120.397	5.01188	98.9415	99.2759	86.9718	111.435	5.47994	12.9475	2.81933e-31	106.987	107.003	99.1668	114.411	3.8993	98.6407	98.5786	89.1008	108.381	5.48112	7.84716	3.36887e-11
ra_l_ns_r	112.725	112.837	97.0746	124.551	4.89461	105.37	105.625	92.4208	117.077	4.59725	14.1543	6.91054e-36	113.112	113.104	106.237	122.801	3.63848	105.157	105.214	97.6413	113.874	4.73706	8.42249	2.23272e-12
ra_l_o	83.1724	83.279	72.5493	91.3014	3.88801	80.0944	79.9714	71.0434	88.6206	3.51909	7.58487	3.44497e-13	83.5231	83.8259	77.1041	89.754	3.35081	80.367	80.1177	73.5331	90.1066	3.62974	4.04072	0.000124535
ra_l_orb_d_l	82.8577	83.5174	64.0225	95.4886	4.79388	76.4253	76.1889	64.2345	89.6969	4.70389	12.3768	3.456e-29	83.082	82.9168	76.0862	90.6752	3.29468	76.3811	76.1849	67.1056	86.3274	5.10982	6.97047	1.75072e-09
ra_l_orb_d_r	122.183	122.832	103.119	130.562	4.6168	115.178	115.935	105.486	125.156	3.8767	15.0161	5.20456e-39	122.795	123.867	114.667	135.998	4.43795	115.056	114.249	107.491	123.443	4.40574	7.82708	2.03407e-11
ra_l_orb_u_l	93.6086	93.6043	79.2028	105.911	4.40202	87.0428	86.9122	77.8374	100.974	4.09739	14.1087	1.05442e-35	93.5828	93.2174	87.4795	103.938	3.79692	86.5856	86.9039	79.0325	93.9812	4.33541	7.67901	4.31176e-11
ra_l_orb_u_r	129.713	130.536	112.383	139.395	4.57173	122.551	122.859	114.481	133.42	3.81623	15.5406	5.09503e-41	130.286	131.155	122.421	145.078	4.62881	122.349	121.514	115.081	130.247	4.32869	7.92075	1.37535e-11
ra_l_po_l	9.24558	9.26698	4.27223	19.4524	2.76115	10.1165	9.77593	4.58488	17.8146	2.75475	-2.88548	0.00416388	8.97421	8.83777	4.30829	14.0164	2.71225	9.71263	9.35787	5.37321	16.7271	2.84692	-1.18771	0.238559
ra_l_po_r	125.965	125.842	109.319	141.258	5.24361	120.537	120.477	109.526	131.913	4.74731	9.91688	1.88396e-20	126.699	125.722	117.707	137.985	5.27782	120.468	120.253	113.629	129	3.84749	6.03342	6.4854e-08
ra_l_ra_r	130.814	130.875	114.209	144.335	5.10776	123.938	124.094	112.872	135.249	4.50936	13.0411	1.37846e-31	131.434	129.961	123.129	142.853	5.27519	123.936	123.606	117.376	132.303	4.03118	7.14327	5.65793e-10
ra_l_zma_l	68.4506	68.5809	57.6108	80.6868	4.69683	62.9434	63.0196	47.9711	76.5241	4.93242	10.4492	2.80864e-22	68.9045	68.9742	59.9495	78.9715	4.04671	62.8352	62.6703	56.1645	70.9629	3.83467	6.88535	1.31579e-09
ra_l_zma_r	129.778	129.885	111.687	141.023	4.91126	122.689	122.66	110.974	134.565	4.11478	14.2978	3.00363e-36	130.71	130.052	120.787	144.891	5.09497	122.464	121.74	115.96	134.186	4.33731	7.79427	2.71127e-11
ra_l_zo_l	84.7544	85.0461	73.1367	96.1548	4.79286	78.2189	78.5219	65.7973	89.4816	4.8091	12.4391	2.02374e-29	84.3712	84.5405	76.093	91.5433	3.71318	78.0995	77.7078	69.7106	87.1453	4.90069	6.45125	1.0817e-08
ra_l_zo_r	119.728	120.317	101.429	128.626	4.66321	113.283	113.501	103.082	124.527	4.12008	13.3832	7.10461e-33	120.585	121.1	111.932	131.388	4.36289	113.902	113.793	101.915	124.591	4.95731	6.40026	1.11984e-08
ra_r_al_l	114.225	114.294	101.333	127.569	4.88879	107.27	106.853	97.1348	121.404	4.3208	13.7763	2.29348e-34	114.363	113.969	104.172	123.508	4.30429	106.492	106.88	97.6819	119.024	4.1902	8.28788	2.61541e-12
ra_r_al_r	99.2125	99.2327	86.013	111.589	5.18137	92.6628	92.6398	79.4636	107.582	4.68801	12.1133	3.56219e-28	99.175	99.0383	88.8358	107.716	4.04011	91.7877	91.881	82.7766	103.013	4.39412	7.8271	2.11562e-11
ra_r_alv	79.3171	79.706	67.7447	88.7891	3.74666	74.4026	74.2745	64.963	83.6483	3.32658	12.6755	3.13688e-30	79.4767	78.9266	74.0795	86.8158	3.3018	74.2726	74.0193	66.9187	82.3734	2.80391	7.59831	6.44167e-11
ra_r_ast_l	137.022	136.977	122.564	148.815	4.474	131.067	130.878	118.691	142.404	4.33543	12.3529	4.26624e-29	137.182	136.653	127.748	147.491	4.75124	131.718	131.082	123.316	140.313	4.50144	5.27919	1.14304e-06
ra_r_ast_r	57.7747	57.5039	45.7961	74.8113	4.61467	55.5692	55.5066	38.884	71.8206	5.12901	4.13083	4.59083e-05	57.9151	57.4055	52.2093	68.0118	3.4514	55.4607	55.4171	46.9414	68.165	4.8178	2.61935	0.0107736
ra_r_b	134.793	134.583	126.164	146.078	3.99677	129.485	129.322	118.633	143.293	4.17138	11.874	2.46428e-27	135.445	135.025	123.7	146.107	5.28275	128.961	129.102	120.35	138.762	4.11478	6.12421	4.077e-08
ra_r_ba	69.9925	70.2112	62.7565	76.8598	2.99592	66.046	65.8701	59.4105	74.8374	2.78205	12.474	1.59393e-29	70.7556	70.5325	65.9752	77.7443	2.94127	66.4884	66.7013	62.6462	72.2098	2.45465	7.04482	7.40236e-10
ra_r_d_l	111.04	111.023	98.0071	124.055	4.76164	104.199	104.3	93.3421	122.738	4.59845	13.3562	7.43957e-33	111.248	111.012	101.687	124.488	4.73254	104.068	104.283	95.4178	118.738	4.84384	6.7053	2.85509e-09
ra_r_d_r	94.8469	94.9419	83.1282	106.092	4.44832	89.1137	88.9626	79.4988	108.591	4.40131	11.8396	3.23526e-27	94.5036	93.8769	87.2352	103.872	3.89538	88.6789	88.4159	79.1349	100.551	4.88386	5.89692	1.01709e-07
ra_r_ec_l	134.31	134.672	118.931	146.163	4.62269	127.138	126.835	116.025	144.333	4.13477	14.9439	7.11662e-39	134.774	134.299	128.111	147.323	4.71279	126.98	126.728	119.406	136.974	3.43766	8.45085	2.35574e-12
ra_r_ec_r	68.1234	68.2456	57.4217	80.6391	4.34861	63.4008	63.6692	54.0125	80.4056	4.22128	10.07	5.48039e-21	67.1833	67.1295	60.9781	75.1457	3.76798	62.7637	62.6728	54.7933	72.2764	3.98923	5.09385	2.39345e-06
ra_r_en_ba	69.9298	70.0953	62.6486	76.9292	3.00397	66.0277	66	59.2792	74.7165	2.78488	12.3104	6.43335e-29	70.7147	70.3364	65.8283	77.7374	2.93192	66.4726	66.683	62.5524	72.2918	2.43287	7.04214	7.55154e-10
ra_r_foram_l	90.4191	90.2149	81.9407	101.515	3.36242	86.0242	86.0726	77.357	96.7562	3.35865	11.9503	1.27534e-27	91.1263	91.0169	85.6534	95.5523	2.63803	86.6918	86.3505	80.5292	96.7994	3.87463	5.98328	8.81395e-08
ra_r_foram_r	62.6588	62.6267	53.6543	69.2958	2.982	59.3736	59.202	50.394	68.4296	3.11291	9.84829	3.06591e-20	63.4259	63.7389	57.7976	67.9226	2.82233	60.0979	59.6742	53.3552	68.8476	3.5258	4.66047	1.35387e-05
ra_r_ft_l	137.352	137.507	120.101	148.588	4.98561	130.613	130.213	121.128	147.148	4.17773	13.3886	8.34198e-33	137.936	138.677	127.869	151.032	5.06304	130.547	130.083	124.156	143.278	3.70682	7.44727	1.70453e-10
ra_r_ft_r	74.5037	74.2531	57.697	88.199	4.8662	69.4959	69.1693	57.4194	85.6049	4.48214	9.78179	5.23609e-20	74.0894	74.6676	64.0968	81.1486	4.06536	69.4365	69.1262	62.7663	83.7222	4.34577	4.94512	4.30044e-06
ra_r_ftm_l	138.767	139.088	121.811	150.337	4.70436	131.518	131.025	120.946	148.598	4.14757	14.938	7.98825e-39	139.181	138.414	131.599	153.002	4.91921	131.092	131.055	124.226	141.238	3.46817	8.50008	2.1711e-12
ra_r_ftm_r	71.1327	71.0754	61.6714	84.0857	4.3207	66.7653	67.0145	55.6803	80.9116	4.34588	9.20977	3.79644e-18	70.0376	70.2284	62.1242	80.7827	4.25998	66.2558	66.2579	58.4019	76.7148	4.13292	4.02983	0.000128877
ra_r_l	125.291	125.39	108.067	141.82	5.57238	122.226	123.123	108.273	142.083	5.89476	4.8835	1.62515e-06	126.502	126.265	116.026	143.232	5.60839	122.84	121.697	114.752	137.837	5.34461	2.98944	0.00373966
ra_r_ms_l	127.043	127.185	110.738	136.738	4.28086	119.332	119.024	108.393	130.344	4.03014	16.9482	8.1042e-47	127.771	127.302	120.827	136.621	4.38543	119.81	120.133	113.203	127.995	3.60606	8.86823	2.59774e-13
ra_r_ms_r	38.7262	39.062	28.8595	47.1484	3.67677	35.2784	35.0982	26.084	47.4395	3.45216	8.83415	6.04522e-17	39.6361	39.9459	30.0464	45.2638	3.59134	35.7572	35.9015	27.2806	42.932	3.19848	5.1012	2.36237e-06
ra_r_ns_l	112.424	112.678	98.3087	125.471	4.87232	105.482	105.35	93.6561	117.315	4.5434	13.4649	3.02669e-33	112.302	112.118	99.9977	120.367	4.17707	104.645	105.116	94.8208	114.271	4.17517	8.19895	3.87255e-12
ra_r_ns_r	106.338	106.422	92.3693	119.704	5.41138	99.2508	98.9187	84.9667	111.841	5.45338	11.9212	1.62963e-27	106.285	106.214	93.8961	116.563	4.61467	98.8269	99.1275	87.9486	110.317	5.34914	6.67674	3.48551e-09
ra_r_o	84.0152	84.2519	75.0357	94.0094	3.71879	80.6533	80.452	69.3819	91.3085	3.65082	8.33682	2.05572e-15	85.1173	84.953	78.1283	91.8936	3.46183	81.0984	80.9064	75.9186	89.9287	3.45344	5.19813	1.57324e-06
ra_r_orb_d_l	122.394	122.869	104.981	134.731	4.86357	115.614	115.396	105.623	131.145	4.14047	13.7173	4.4689e-34	122.749	122.464	114.742	135.331	4.59543	115.443	115.013	106.954	128.16	4.21453	7.41042	1.3402e-10
ra_r_orb_d_r	82.6086	83.1992	63.2201	94.7369	5.10198	76.893	77.1832	63.5867	92.8856	4.5386	10.8166	1.60931e-23	82.1945	82.083	74.7642	90.6103	3.68049	76.4802	76.7214	69.1282	86.2128	4.2895	6.39423	1.17454e-08
ra_r_orb_u_l	129.664	130.073	113.249	142.439	4.81467	122.788	122.744	113.585	140.383	4.13771	13.9962	3.7363e-35	130.064	128.985	121.138	144.432	4.74809	122.259	122.333	114.361	135.108	4.10149	7.86777	1.91397e-11
ra_r_orb_u_r	93.0673	93.319	75.5078	105.389	4.73274	87.3929	87.4995	77.6849	105.44	4.14948	11.6502	1.82901e-26	92.947	92.524	84.1064	103.024	3.78267	86.7562	86.8773	80.0544	98.7987	4.17867	6.94658	1.03589e-09
ra_r_po_l	125.447	125.375	110.961	140.073	5.37858	119.791	119.481	108.89	131.006	4.51676	10.4058	4.68878e-22	126.239	125.465	118.335	138.169	5.48345	120.025	119.696	112.177	127.833	4.00517	5.78817	1.75638e-07
ra_r_po_r	10.2601	10.2212	4.66833	18.7392	3.1402	10.8197	10.6692	3.47936	20.34	3.04145	-1.65419	0.099034	10.1915	10.6125	3.93534	15.9769	2.89929	10.2772	9.4483	6.07631	19.4743	3.03462	-0.129124	0.897593
ra_r_zma_l	130.147	130.507	114.116	143.475	5.10163	122.807	122.698	109.26	135.537	4.58632	13.8274	1.38368e-34	130.842	130.076	123.695	140.422	4.30916	122.256	122.691	113.452	132.575	3.80648	9.44413	1.71041e-14
ra_r_zma_r	67.4684	67.751	54.9173	78.7334	4.82521	62.5396	62.4118	45.982	75.2706	5.08933	9.08195	9.87033e-18	67.593	67.6113	57.674	74.7443	3.77472	61.9768	61.7283	56.4033	70.7781	3.77405	6.65439	3.55372e-09
ra_r_zo_l	120.661	121.155	103.35	133.537	4.90856	114.557	114.486	102.773	132.591	4.50829	11.8348	3.59695e-27	121.654	120.852	113.284	134.799	5.04972	114.209	113.952	103.999	128.691	4.48899	6.9689	9.54821e-10
ra_r_zo_r	85.1028	85.2783	73.9127	99.3857	5.27502	79.2573	79.45	58.3476	93.8473	5.26458	10.136	3.26091e-21	84.9767	84.9126	76.3678	95.1771	4.42732	78.1464	78.3195	68.8976	88.3989	4.66186	6.7192	2.70894e-09
zma_l_b	152.903	152.805	138.753	168.102	5.60453	145.351	145.005	131.133	168.397	5.29444	12.6588	3.20005e-30	153.477	154.039	142.636	166.954	5.72186	145.015	145.305	135.766	156.233	4.95957	7.06771	6.377e-10
zma_l_d_l	57.5416	57.7349	47.7002	66.5657	3.49895	52.8863	53.1348	45.7016	61.5553	3.52103	12.1194	3.06361e-28	57.9841	57.1611	51.932	66.1561	3.95166	53.6361	53.4321	46.9791	60.7206	3.61907	5.13182	2.07424e-06
zma_l_d_r	75.3691	75.7457	64.3648	90.5709	4.60496	69.8917	70.0756	59.29	82.8298	4.02006	11.5795	3.31863e-26	76.1758	76.0917	66.5064	83.6226	4.63715	70.3484	70.1834	62.7252	80.5318	4.42458	5.75028	1.66683e-07
zma_l_ec_l	38.441	38.4947	29.7793	46.716	2.7556	35.2547	35.3528	26.6847	42.3565	2.76383	10.5502	1.23955e-22	38.3813	39.2833	31.6238	43.1092	3.22291	35.6857	35.6947	30.3135	40.5469	2.34867	4.27505	5.82461e-05
zma_l_ec_r	104.663	104.978	90.5045	120.131	4.50329	99.8451	99.7563	87.9465	113.072	3.98558	10.3527	6.49681e-22	106.078	105.881	99.2103	115.393	3.75665	99.7174	99.4877	90.701	108.493	4.08178	7.25178	2.68757e-10
zma_l_ft_l	60.1961	60.1949	47.4482	69.5229	4.30221	55.0273	54.5776	45.6328	67.6437	4.07289	11.2749	3.59487e-25	61.0664	61.3894	49.8397	68.6652	4.58701	56.3312	55.0803	48.74	71.0208	4.51163	4.65471	1.30787e-05
zma_l_ft_r	114.548	114.337	99.0107	130.948	4.88765	108.484	108.206	96.8279	121.2	4.19043	12.1719	2.48796e-28	115.686	115.535	108.557	126.527	4.27173	108.887	108.051	99.411	123.463	4.73857	6.73971	2.55306e-09
zma_l_ftm_l	47.2814	47.4413	36.6265	55.6741	2.97875	44.1787	44.1152	36.4546	51.6987	2.74519	9.89816	2.14051e-20	47.1109	47.2229	36.9837	54.6929	4.20644	44.2225	44.0795	40.3981	49.3314	2.13249	3.87345	0.000276043
zma_l_ftm_r	111.245	111.368	95.7445	126.598	4.72781	105.836	105.685	94.2434	119.803	4.08603	11.1847	8.65606e-25	112.309	112.503	106.073	121.102	4.13412	105.769	105.97	97.5969	115.831	4.13055	7.07714	5.61626e-10
zma_l_l	176.601	176.614	159.403	194.316	7.44476	169.397	169.124	152.11	192.747	6.57395	9.37411	1.19096e-18	177.163	177.221	164.837	192.902	6.17295	169.606	169.407	154.369	182.73	7.11276	5.07457	2.65063e-06
zma_l_ms_l	80.8169	80.6294	67.1566	93.2063	4.66991	77.1018	77.5347	66.6491	88.3337	4.20251	7.64185	2.37367e-13	81.2064	80.6906	71.1204	92.5861	4.09612	75.7617	76.3626	66.3948	82.4747	3.93276	6.06421	4.47157e-08
zma_l_ms_r	131.179	131.339	114.542	143.929	4.59951	124.353	124.342	112.835	139.627	4.35052	13.9317	4.88246e-35	132.679	132.688	121.832	143.634	4.58425	123.648	123.45	117.061	132.296	3.71203	9.68294	7.79454e-15
zma_l_orb_d_l	29.2755	29.094	21.6522	37.4276	3.51285	25.944	26.0913	18.3929	33.657	2.93801	9.40106	1.04369e-18	29.4252	29.6653	24.0015	35.7196	2.77246	26.1243	26.2391	19.8863	32.8973	3.03236	5.08104	2.53654e-06
zma_l_orb_d_r	81.6148	81.7292	70.946	95.5224	4.09739	77.5695	77.6246	67.9269	89.1665	3.63748	9.54135	3.3738e-19	82.4688	82.1942	76.0819	89.7867	3.26506	77.3924	77.6294	68.9674	85.8349	3.94006	6.27429	2.02234e-08
zma_l_orb_u_l	59.5389	59.5781	50.631	70.5163	3.34533	55.6396	55.91	47.2063	63.0969	3.05673	11.1201	1.32675e-24	60.0936	60.578	50.4072	66.6201	3.94999	55.9117	55.5895	51.4569	62.3816	2.828	5.44435	7.11927e-07
zma_l_orb_u_r	96.7821	96.6368	84.1512	110.206	4.19823	91.9735	92.0648	80.8533	104.094	3.87322	10.8789	9.26845e-24	97.8344	98.6575	89.3418	105.217	3.98956	92.1257	92.0853	85.3061	102.215	3.97628	6.40985	1.02078e-08
zma_l_po_l	72.101	72.0659	62.1444	83.9349	3.94475	68.8712	68.7564	58.6132	79.1158	3.63069	7.78507	9.08938e-14	72.5902	72.8674	66.2326	81.6139	3.43553	68.5276	68.4013	60.3738	74.1167	3.21324	5.46224	5.47048e-07
zma_l_po_r	129.405	129.461	115.726	144.076	4.93768	123.949	123.72	113.41	135.179	4.60098	10.4479	2.88454e-22	130.419	130.331	119.596	138.61	4.19042	123.208	122.923	113.76	129.175	3.33191	8.51892	1.32059e-12
zma_l_zma_r	93.8005	93.8548	74.8681	112.33	5.46429	89.7352	89.6181	74.9507	103.527	4.70355	7.28655	2.43075e-12	94.7004	93.9302	86.6184	108.17	4.88609	89.3955	88.3965	80.4253	101.23	4.6258	4.98641	3.65169e-06
zma_l_zo_l	31.3721	31.6627	20.6298	41.1728	3.64702	27.3234	27.1549	17.9327	42.1351	3.62398	10.1765	2.37541e-21	30.6543	30.4659	23.402	42.0896	3.94909	27.3926	27.7622	20.6836	33.6097	3.30746	4.00467	0.000143845
zma_l_zo_r	78.2685	78.3382	65.9679	92.2931	4.60162	74.6679	74.5445	63.608	89.004	4.26901	7.41285	1.04761e-12	79.1875	78.7462	71.1404	87.9035	3.71624	75.4186	75.5338	61.7729	85.3606	4.95252	3.84975	0.000252824
zma_r_b	152.878	153.144	139.024	166.546	5.42399	145.562	145.513	131.254	165.632	5.36729	12.39	3.07943e-29	153.796	154.73	143.332	169.368	5.68618	145.404	144.985	135.676	154.675	4.69813	7.19549	3.90967e-10
zma_r_d_l	75.2426	75.6561	63.2512	87.6874	4.41771	70.3914	70.4894	60.2915	81.937	3.75599	10.8115	1.82575e-23	76.0048	76.8734	65.6178	89.3904	5.08321	71.1577	70.2297	64.797	79.7469	3.95006	4.762	9.37979e-06
zma_r_d_r	57.6131	57.434	48.8457	67.502	3.69647	53.2373	53.2319	44.4878	62.762	3.39644	11.2649	4.03306e-25	57.7511	57.5529	50.1746	65.0409	4.26474	53.9924	53.8838	47.6414	63.6875	3.79981	4.16183	8.14954e-05
zma_r_ec_l	104.814	105.105	92.2746	116.096	4.53783	100.076	99.9398	88.2952	113.107	3.98576	10.1364	3.57035e-21	105.816	105.104	96.9467	118.247	5.13862	100.366	100.135	94.0669	110.87	4.02921	5.27794	1.26308e-06
zma_r_ec_r	38.2779	38.2301	30.4159	46.3153	2.9903	35.3702	35.361	26.778	42.9436	2.87372	9.0603	1.15178e-17	38.5828	38.4881	31.6175	43.2322	3.01087	35.7696	36.19	30.423	41.3181	2.61671	4.46032	2.76781e-05
zma_r_ft_l	114.266	114.429	99.0849	126.674	5.03158	108.781	108.487	97.7203	123.52	4.04046	10.983	5.3492e-24	115.605	115.227	107.787	129.66	5.4381	109.503	108.042	102.734	124.277	4.51675	5.45907	5.86801e-07
zma_r_ft_r	59.9714	59.6392	47.0605	70.114	4.24992	54.5451	54.628	45.5328	67.3311	4.41674	11.4404	9.0851e-26	60.6317	60.3481	50.6905	69.2104	4.14437	55.843	55.0375	49.1634	72.0522	4.67997	4.84484	6.43543e-06
zma_r_ftm_l	111.007	111.06	97.8803	122.759	4.76385	105.894	105.896	95.2055	119.797	4.01183	10.6092	9.34861e-23	111.915	110.934	103.837	126.054	5.2219	105.935	105.458	99.5801	116.776	4.07098	5.71154	2.2256e-07
zma_r_ftm_r	47.3543	47.3738	37.0998	55.7421	3.07772	44.1489	44.1906	36.5325	52.8915	2.91476	9.77223	5.52886e-20	47.3059	48.071	39.6183	54.3331	3.85154	44.7206	44.827	40.1421	50.2905	2.47544	3.57127	0.00066592
zma_r_l	176.234	175.988	155.536	195.918	7.38185	169.464	169.556	151.669	187.301	6.74491	8.74901	1.13336e-16	177.351	177.047	166.472	193.453	6.35285	169.771	169.686	156.769	180.053	6.15768	5.41812	6.50025e-07
zma_r_ms_l	129.973	129.53	110.578	141.503	4.83518	123.69	124.104	110.572	133.406	3.98366	12.9611	3.56233e-31	130.858	130.209	123.134	144.179	4.60214	123.007	122.51	114.727	133.694	4.22178	7.95096	1.22332e-11
zma_r_ms_r	80.8995	81.2102	69.2661	90.9177	4.55334	77.0032	77.5718	67.4635	87.5073	4.32851	8.01468	1.91068e-14	82.2138	82.0556	68.0297	90.9582	4.86717	75.965	75.4752	67.5325	85.2012	3.43742	6.6326	5.75149e-09
zma_r_orb_d_l	81.977	82.5349	70.2645	94.0636	4.16193	78.3215	78.3028	68.1316	89.1208	3.54327	8.64261	2.57059e-16	82.6468	82.1756	74.5869	95.5539	4.78229	78.5568	78.1094	72.1346	87.7001	4.05556	4.12537	9.38026e-05
zma_r_orb_d_r	30.0153	29.9068	20.6426	37.5285	3.53772	26.7689	26.7859	19.4509	32.2622	2.94777	9.11053	8.98664e-18	29.7331	29.5786	23.4645	36.2538	3.22277	27.3366	26.5994	22.4662	34.2137	2.89425	3.49915	0.000778632
zma_r_orb_u_l	96.8571	97.4636	85.5823	108.04	4.31086	92.4474	92.372	81.0678	103.99	3.78673	9.93161	1.74276e-20	97.868	98.2075	89.8248	110.583	4.86172	92.7443	92.3565	86.676	101.474	4.01342	5.14023	2.10008e-06
zma_r_orb_u_r	59.8639	59.9776	50.9097	68.8969	3.54643	56.0583	56.1113	48.7563	65.284	3.16488	10.3464	6.74664e-22	60.3806	61.1068	51.4608	66.6043	3.94362	56.7765	56.1921	53.0542	63.3724	2.7865	4.72057	1.16614e-05
zma_r_po_l	127.632	127.468	113.003	137.932	4.91633	122.542	122.54	110.641	134.211	4.02821	10.3495	7.68632e-22	128.741	128.907	120.061	142.289	4.85795	122.384	122.338	112.188	131.576	4.00868	6.38376	1.27896e-08
zma_r_po_r	72.8871	72.4819	62.5512	82.5653	3.6192	69.8531	70.0504	60.1513	79.0476	3.79323	7.47847	6.79858e-13	73.4477	73.6261	61.7503	80.9551	3.91224	68.9302	69.0623	62.7828	74.4758	2.79335	5.94345	9.64434e-08
zma_r_zo_l	79.497	79.4866	66.6037	91.6982	4.63669	76.3902	76.3972	64.6462	86.5176	4.00068	6.55603	2.17116e-10	80.9651	80.2022	73.0709	94.6207	5.15181	76.4818	75.8775	68.0734	87.6637	4.58544	4.11125	9.75908e-05
zma_r_zo_r	33.0599	33.0455	21.1992	44.4316	4.08095	29.2137	28.9308	20.4596	44.4634	4.11995	8.57102	3.94061e-16	32.8114	32.3814	23.9183	40.9324	4.16608	28.7196	28.6043	21.0228	35.9564	3.77619	4.60242	1.61114e-05
zo_l_b	134.801	134.547	121.114	151.741	5.05261	130.541	130.311	118.737	154.677	4.92809	7.79819	8.20765e-14	135.606	134.522	128.055	147.903	4.74391	129.972	129.838	121.38	141.072	4.73517	5.3159	9.81017e-07
zo_l_d_l	28.0225	28.1306	20.2673	37.2091	2.64476	27.6102	27.4208	19.4518	38.898	3.09184	1.30957	0.191268	29.2725	28.9927	22.0422	35.2679	3.13379	28.2251	27.4461	23.3436	34.4455	2.68026	1.60653	0.112295
zo_l_d_r	47.1728	46.9413	38.9216	58.1619	3.52047	45.5466	45.568	36.9842	56.0196	3.71842	4.10396	5.11967e-05	48.8811	48.4359	40.6554	59.6471	3.9653	45.9642	45.3025	39.3301	56.9519	3.60911	3.4406	0.000938877
zo_l_ec_l	30.2127	30.3068	25.3138	34.7819	1.93887	29.199	29.1171	23.4128	37.4007	2.21209	4.45348	1.16185e-05	30.081	29.5569	27.179	34.427	1.83093	29.373	29.2742	25.3603	32.2359	1.46011	1.91196	0.0597356
zo_l_ec_r	81.5727	81.7562	68.4128	91.1848	3.90965	79.6813	79.3514	70.6964	90.2899	4.11391	4.30662	2.187e-05	83.8978	83.9491	75.9767	95.6964	4.74161	79.7063	80.0128	70.4247	89.8766	3.98524	4.27982	5.40865e-05
zo_l_ft_l	46.9241	46.7118	39.3387	54.2909	3.06198	44.7571	44.5907	36.7645	53.4499	2.82908	6.71749	8.11076e-11	47.7202	47.558	42.5085	54.9176	2.74352	45.6661	45.4069	40.1735	56.0289	3.30013	3.02713	0.00337636
zo_l_ft_r	89.2869	89.2117	74.3985	100.18	4.28025	86.6983	85.9078	79.0435	100.953	4.09579	5.64669	3.52016e-08	91.2387	90.9555	83.5033	100.367	5.00122	87.1093	87.2033	77.9613	101.166	4.32233	3.95097	0.000172172
zo_l_ftm_l	37.4891	37.5778	32.6209	42.5711	2.04847	36.3923	36.3886	30.3339	43.2879	2.16708	4.75298	2.99405e-06	37.236	36.8087	33.3779	44.724	2.44627	36.2043	36.0222	33.5756	39.9334	1.54101	2.25694	0.0273412
zo_l_ftm_r	86.9242	86.6918	71.127	98.9499	4.15354	84.6271	84.2279	76.1161	96.0891	4.09691	5.0881	6.06486e-07	88.9418	88.8333	81.8493	100.927	4.68656	84.6493	84.9234	76.1896	96.818	4.05751	4.37942	3.7323e-05
zo_l_l	176.75	176.781	160.008	194.825	7.51101	170.328	170.129	151.871	196.639	6.70403	8.24262	4.10189e-15	177.14	175.963	165.375	194.66	6.27989	170.543	169.876	155.755	186.938	7.82937	4.15657	8.53604e-05
zo_l_ms_l	102.517	102.4	88.0413	119.288	5.49928	96.056	95.9063	83.2557	111.951	4.51752	11.7313	1.12238e-26	102.382	101.799	94.0176	112.016	4.05096	95.214	95.3653	81.9614	105.08	5.34623	6.75875	2.95865e-09
zo_l_ms_r	130.527	130.982	112.314	140.226	4.75973	123.517	123.564	112.298	143.262	4.39378	13.9845	3.22202e-35	132.309	132.908	120.273	145.452	5.25613	123.213	122.03	115.198	134.706	4.61504	8.22473	3.8438e-12
zo_l_orb_d_l	3.65757	3.09181	0.605054	14.5808	2.17399	3.38869	2.88461	0.632248	12.4807	1.9977	1.17688	0.240091	3.39166	2.52762	0.542887	8.62759	2.14186	3.00284	2.67174	0.952507	7.50947	1.5542	0.929247	0.355903
zo_l_orb_d_r	59.1625	59.1883	48.627	69.7168	3.5232	57.9032	57.7891	49.7192	68.7157	3.85282	3.11701	0.00198787	60.9249	60.7024	53.7093	71.0917	4.42718	57.8402	58.1215	49.5473	68.6407	3.67317	3.39138	0.00110983
zo_l_orb_u_l	33.9661	33.9774	28.0917	40.6522	2.37729	34.2068	34.1122	28.7539	39.756	2.34994	-0.930419	0.35283	34.872	35.2158	29.8598	40.0048	2.46397	34.2321	33.8675	30.0392	38.3732	1.97706	1.28118	0.204105
zo_l_orb_u_r	68.346	68.3805	56.1727	81.2217	3.67513	67.3359	67.267	58.8252	78.8688	3.89351	2.43799	0.0152949	70.2364	69.9963	62.6113	79.4092	4.4858	67.4942	67.3549	61.1199	78.7236	3.57587	3.02317	0.00343163
zo_l_po_l	88.1406	88.1396	78.9027	97.2453	4.34796	83.8348	83.8999	74.0448	95.4832	3.68363	9.76438	6.61494e-20	87.8745	88.0093	80.0613	93.7111	3.17228	83.5268	83.5101	74.0604	92.0033	4.00951	5.37824	8.4181e-07
zo_l_po_r	121.995	121.658	108.743	132.168	4.51633	117.633	117.579	107.217	131.569	4.28342	9.05604	1.19398e-17	123.187	123.197	111.623	136.122	4.77253	117.021	116.263	106.132	126.484	3.63529	6.50018	8.73345e-09
zo_l_zo_r	55.2757	55.7348	41.4257	67.6498	4.9329	54.6543	54.6568	37.9824	70.3694	5.46132	1.09122	0.275974	57.0849	55.893	47.3629	70.5489	5.72967	55.7075	56.2475	41.0599	68.1564	5.3383	1.11244	0.269384
zo_r_b	134.049	134.259	118.246	149.198	4.84926	129.942	129.579	119.122	150.296	4.83986	7.74649	1.15773e-13	135.053	135.357	127.958	147.735	4.7191	129.796	129.589	120.904	140.589	4.53045	5.08253	2.49676e-06
zo_r_d_l	45.2504	45.5626	35.9091	55.084	3.52937	43.9976	44.1275	34.9122	54.1254	3.78796	3.12722	0.00192153	46.3183	46.1077	40.2611	52.9817	3.45155	45.4708	45.3924	36.2063	54.916	3.98322	1.01697	0.312374
zo_r_d_r	26.6958	26.8322	19.373	34.4684	2.67184	26.2336	26.3444	17.773	36.5778	3.03151	1.4782	0.140318	27.2194	26.8383	21.9371	34.4605	2.92716	27.5316	27.4221	21.8708	34.071	3.31342	-0.446685	0.656359
zo_r_ec_l	80.0604	80.2787	67.9789	89.1134	4.15981	77.9026	77.5115	68.5644	91.7794	4.421	4.5936	6.20233e-06	81.3698	80.3662	71.7222	91.8411	4.31009	79.1497	79.3647	66.5715	88.8165	4.44572	2.26755	0.0261274
zo_r_ec_r	31.0425	30.8569	26.6677	36.9598	2.11785	30.4166	30.3695	24.7154	39.5038	2.18176	2.66016	0.0081898	31.9975	31.9624	28.157	35.657	1.74041	29.7254	29.478	25.5843	35.732	2.22013	5.09412	2.60161e-06
zo_r_ft_l	87.3046	87.5814	74.8353	96.4404	4.41711	84.9472	84.7464	76.3958	97.581	4.31475	4.93378	1.27833e-06	88.9417	88.2978	80.4045	97.8078	4.32862	86.3045	86.2514	74.9364	99.8992	4.26374	2.74519	0.00750397
zo_r_ft_r	47.2464	47.1744	39.1914	55.7375	2.83405	45.0014	44.9204	37.2034	54.0546	3.01274	7.01404	1.31215e-11	48.1588	47.941	43.3174	55.1926	2.90035	45.3626	44.5664	40.1565	56.7094	3.667	3.78243	0.000312492
zo_r_ftm_l	85.0224	84.8325	73.7227	94.5313	4.19425	82.6173	82.4014	72.8908	97.4426	4.46151	5.0758	6.45195e-07	86.2415	85.7939	77.8032	96.3355	4.16877	83.649	83.8218	71.0524	94.3525	4.41802	2.69932	0.00852129
zo_r_ftm_r	38.3853	38.2794	33.0105	45.5332	2.24536	37.4378	37.4556	31.6023	45.9993	2.13036	3.95602	9.32583e-05	38.9147	38.6905	35.0453	42.9554	2.20557	36.8974	36.6083	31.6005	43.4031	2.4277	3.88978	0.000211008
zo_r_l	176.495	176.503	159.002	195.364	7.48063	170.307	170.257	151.402	193.04	6.83168	7.89269	4.42855e-14	177.337	175.952	166.693	195.918	6.72208	170.659	170.576	156.112	183.948	7.27761	4.26296	5.63048e-05
zo_r_ms_l	129.115	129.248	108.64	143.047	5.06835	122.225	122.293	108.543	133.636	4.42645	13.2333	2.71148e-32	129.933	129.677	120.802	141.711	4.6087	122.248	122.333	113.164	132.188	4.88277	7.23935	2.79325e-10
zo_r_ms_r	103.958	104.354	90.6582	116.99	5.16366	97.338	97.3922	87.4827	111.459	4.52749	12.4564	2.10264e-29	105.048	104.777	92.8889	115.88	5.055	96.2874	95.7748	80.8517	110.659	5.31479	7.554	6.93154e-11
zo_r_orb_d_l	58.1157	58.2076	48.1721	67.6662	3.73971	56.7588	56.2569	47.9526	68.4619	4.02614	3.19112	0.00155335	58.9534	57.7311	49.8447	67.1297	3.65184	57.9144	58.1079	46.0128	68.008	4.45749	1.14032	0.257779
zo_r_orb_d_r	4.35362	3.81577	0.881182	11.9232	2.59531	4.13559	3.72193	0.77772	14.4501	2.46099	0.787782	0.431388	4.46669	4.29162	1.12898	7.59256	2.05389	3.48556	3.01551	0.742796	9.68134	2.25409	2.03482	0.0452965
zo_r_orb_u_l	66.6873	66.925	57.2416	75.5994	3.89093	65.7915	65.5071	54.8407	78.4604	4.37773	1.97646	0.0489411	67.952	67.8923	61.2101	76.5855	3.78824	66.9365	66.745	55.4716	77.0064	4.39874	1.1064	0.27203
zo_r_orb_u_r	33.5257	33.6621	27.4584	40.2885	2.22564	33.83	33.9637	27.3175	40.7062	2.536	-1.16547	0.24468	34.3202	34.4719	29.8156	39.5315	2.43301	34.3257	33.8624	30.5382	38.7404	1.96873	-0.0111079	0.991167
zo_r_po_l	119.573	119.817	105.525	129.53	4.49716	115.133	114.68	104.405	127.295	4.25473	9.26815	2.49112e-18	120.5	121.302	112.024	130.266	4.21595	115.669	116.101	100.156	124.646	4.75999	4.80521	7.49507e-06
zo_r_po_r	90.2451	90.5673	81.4138	100.874	4.12858	86.175	86.314	76.7761	96.2921	3.77773	9.39889	9.57796e-19	90.4813	90.5894	80.3675	98.2715	4.00797	84.7724	84.7454	74.6349	92.3984	3.58733	6.71261	2.88679e-09
zy_l_al_l	80.2677	80.7696	70.9036	90.5256	3.61737	75.2991	75.2314	66.0988	83.9524	3.42899	12.8821	4.65888e-31	81.2023	80.8917	75.4812	88.0715	3.07572	75.8584	75.6514	66.2463	82.2358	3.78852	6.92602	1.28858e-09
zy_l_al_r	98.812	99.0358	87.4932	107.13	3.66596	93.4271	93.2779	84.3879	104.162	3.39846	13.9207	5.60019e-35	99.7499	100.052	93.1959	107.538	3.52736	94.0298	93.5617	86.5809	99.9218	3.54325	7.23588	2.79382e-10
zy_l_alv	72.6896	73.0038	62.4099	79.7892	3.0554	68.1642	68.3332	60.31	75.0511	2.5117	14.7856	4.58944e-38	72.882	72.228	67.4489	79.4064	3.12364	68.1292	67.727	63.1798	73.3703	2.37126	7.66491	6.10831e-11
zy_l_ast_l	84.0585	83.9042	68.5803	96.5384	4.94231	78.4804	78.0397	69.5625	89.5197	4.63005	10.6441	6.02158e-23	83.2847	82.6612	77.3419	90.5963	3.23019	77.1966	76.1529	66.2521	89.5778	5.69026	5.88468	1.76074e-07
zy_l_ast_r	152.697	152.737	136.35	163.945	4.91498	144.93	144.678	134.244	161.381	4.48184	15.09	1.78898e-39	153.341	152.735	144.668	164.796	4.93219	144.294	144.559	136.349	154.63	4.14087	8.88464	2.28383e-13
zy_l_b	138.516	138.497	126.335	154.438	4.39975	132.299	132.201	119.726	151.394	4.43938	12.8542	5.73359e-31	138.901	138.758	130.564	150.054	4.53592	131.985	131.495	123.338	141.986	4.58807	6.77934	2.06617e-09
zy_l_ba	77.9846	78.1435	67.3898	85.2732	3.19819	73.1014	73.0346	65.5772	83.4017	2.73315	14.9998	5.40884e-39	78.2011	78.3088	72.8307	85.2735	3.25614	73.1117	73.316	66.9061	80.1469	2.92696	7.35164	1.76839e-10
zy_l_d_l	79.0131	78.999	69.9414	88.9007	3.31166	74.2465	74.2181	65.2166	82.9793	3.30392	13.1678	3.78256e-32	79.6257	80.0458	71.3543	86.1463	3.45898	75.269	74.8687	68.4887	86.4886	3.74303	5.40649	6.88267e-07
zy_l_d_r	98.2398	98.1019	88.1074	106.595	4.00962	92.2433	92.4667	82.8557	100.929	3.57134	14.4319	6.88971e-37	99.2431	99.251	89.4846	112.235	4.61972	93.0654	92.5526	85.0386	101.068	3.64437	6.64014	4.57477e-09
zy_l_ec_l	47.2605	47.1054	38.3427	57.7152	3.15252	44.2667	44.0842	36.603	52.5235	3.18294	8.63593	2.48103e-16	47.2483	47.6495	36.8759	51.9032	3.27192	45.0258	45.6628	37.8913	52.8527	3.51379	2.92757	0.00448098
zy_l_ec_r	126.356	126.529	110.967	135.105	4.25528	120.075	119.747	110.79	130.074	3.79034	14.2433	3.65541e-36	127.766	127.844	120.182	141.562	4.51579	120.471	121.105	112.128	127.467	3.61408	7.97653	1.38549e-11
zy_l_en_ba	78.4563	78.6131	67.9307	86.3894	3.21213	73.5361	73.5464	65.8684	83.6387	2.7222	15.1011	2.30833e-39	78.6248	78.4837	73.1662	85.7967	3.2942	73.5187	73.7237	67.3515	80.9456	2.96697	7.28427	2.37327e-10
zy_l_foram_l	78.3632	78.2172	65.1161	87.3933	3.68536	73.5544	73.5844	64.5136	85.04	3.6843	11.9253	1.57355e-27	78.7178	78.0557	72.6875	87.6493	4.21549	73.4513	72.1696	65.5266	82.7763	3.87122	5.81974	1.2639e-07
[truncated: 60 more rows]

## Sheet: All reg differences
	Split males					Zagreb males					t-test (males)		Split females					Zagreb females					t-test (females)
[truncated: 947 more rows]

## Sheet: All PCA loadings
Variables	PC1	PC2
ast_l_orb_d_r	0.0437356	-0.00811493
[truncated: 945 more rows]
