# Supplementary material for: Developing a fully applicable machine learning (ML) based sex classification model using linear cranial dimensions
Source: Research Square preprint supplement (doi:10.21203/rs.3.rs-3939483/v1), 2024-02-15
Supplement: Supplementary file 2 [file b9ae2c9092aa2d267c14d74a.xlsx]

## Sheet: Content
								Models' performances and parameters
														Abbreviations
														WRD	Without regional differences
														Uncorr	Without correlation
														R1	Round 1
														R2	Round 2
														Click on Raw or Scaled to see the result of a particular step.

## Sheet: Standard raw
Classifier	Evaluation	Accuracy	Sensitivity	Specificity	PPV	NPV
Logistic Regression	CV	0.883234	0.88024	0.886228	0.885542	0.880952
	Test	0.8625	0.925	0.8	0.822222	0.914286
	Test ST	0.825	0.95	0.7	0.76	0.933333
	Test ZG	0.9	0.9	0.9	0.9	0.9
Linear Discriminant Analysis	CV	0.892216	0.874251	0.91018	0.906832	0.878613
	Test	0.875	0.875	0.875	0.875	0.875
	Test ST	0.875	0.95	0.8	0.826087	0.941176
	Test ZG	0.875	0.8	0.95	0.941176	0.826087
Support Vector Machine	CV	0.850299	0.808383	0.892216	0.882353	0.823204
	Test	0.85	0.85	0.85	0.85	0.85
	Test ST	0.85	0.95	0.75	0.791667	0.9375
	Test ZG	0.85	0.75	0.95	0.9375	0.791667
Random Forest	CV	0.859281	0.844311	0.874251	0.87037	0.848837
	Test	0.875	0.925	0.825	0.840909	0.916667
	Test ST	0.875	1	0.75	0.8	1
	Test ZG	0.875	0.85	0.9	0.894737	0.857143
K-Nearest Neighbors	CV	0.856287	0.826347	0.886228	0.878981	0.836158
	Test	0.875	0.95	0.8	0.826087	0.941176
	Test ST	0.85	0.95	0.75	0.791667	0.9375
	Test ZG	0.9	0.95	0.85	0.863636	0.944444
Gradient Boosting Classifier	CV	0.844311	0.850299	0.838323	0.840237	0.848485
	Test	0.9375	0.975	0.9	0.906977	0.972973
	Test ST	0.95	1	0.9	0.909091	1
	Test ZG	0.925	0.95	0.9	0.904762	0.947368

## Sheet: Standard scaled
Classifier	Evaluation	Accuracy	Sensitivity	Specificity	PPV	NPV
Logistic Regression	CV	0.877246	0.868263	0.886228	0.884146	0.870588
	Test	0.9	0.95	0.85	0.863636	0.944444
	Test ST	0.9	0.95	0.85	0.863636	0.944444
	Test ZG	0.9	0.95	0.85	0.863636	0.944444
Linear Discriminant Analysis	CV	0.892216	0.874251	0.91018	0.906832	0.878613
	Test	0.875	0.875	0.875	0.875	0.875
	Test ST	0.875	0.95	0.8	0.826087	0.941176
	Test ZG	0.875	0.8	0.95	0.941176	0.826087
Support Vector Machine	CV	0.865269	0.844311	0.886228	0.88125	0.850575
	Test	0.875	0.925	0.825	0.840909	0.916667
	Test ST	0.9	1	0.8	0.833333	1
	Test ZG	0.85	0.85	0.85	0.85	0.85
Random Forest	CV	0.859281	0.844311	0.874251	0.87037	0.848837
	Test	0.875	0.925	0.825	0.840909	0.916667
	Test ST	0.875	1	0.75	0.8	1
	Test ZG	0.875	0.85	0.9	0.894737	0.857143
K-Nearest Neighbors	CV	0.841317	0.832335	0.850299	0.847561	0.835294
	Test	0.85	0.9	0.8	0.818182	0.888889
	Test ST	0.875	0.95	0.8	0.826087	0.941176
	Test ZG	0.825	0.85	0.8	0.809524	0.842105
Gradient Boosting Classifier	CV	0.844311	0.850299	0.838323	0.840237	0.848485
	Test	0.9375	0.975	0.9	0.906977	0.972973
	Test ST	0.95	1	0.9	0.909091	1
	Test ZG	0.925	0.95	0.9	0.904762	0.947368

## Sheet: Standard raw HPT-R1
Classifier	Evaluation	Accuracy	Sensitivity	Specificity	PPV	NPV	Best Params
Logistic Regression	CV	0.892216	0.892216	0.892216	0.892216	0.892216	{'C': 0.1}
	Test	0.8875	0.95	0.825	0.844444	0.942857
	Test ST	0.85	0.95	0.75	0.791667	0.9375
	Test ZG	0.925	0.95	0.9	0.904762	0.947368
Linear Discriminant Analysis	CV	0.892216	0.874251	0.91018	0.906832	0.878613	{'solver': 'svd'}
	Test	0.875	0.875	0.875	0.875	0.875
	Test ST	0.875	0.95	0.8	0.826087	0.941176
	Test ZG	0.875	0.8	0.95	0.941176	0.826087
Support Vector Machine	CV	0.901198	0.892216	0.91018	0.908537	0.894118	{'C': 0.1, 'kernel': 'linear'}
	Test	0.8875	0.95	0.825	0.844444	0.942857
	Test ST	0.85	0.95	0.75	0.791667	0.9375
	Test ZG	0.925	0.95	0.9	0.904762	0.947368

## Sheet: Standard raw HPT-R2
Classifier	Evaluation	Accuracy	Sensitivity	Specificity	PPV	NPV	Best Params
Logistic Regression	CV	0.892216	0.892216	0.892216	0.892216	0.892216	{'C': 0.1, 'penalty': 'l2', 'solver': 'newton-cg'}
	Test	0.8875	0.95	0.825	0.844444	0.942857
	Test ST	0.85	0.95	0.75	0.791667	0.9375
	Test ZG	0.925	0.95	0.9	0.904762	0.947368
Linear Discriminant Analysis	CV	0.892216	0.874251	0.91018	0.906832	0.878613	{'shrinkage': None, 'solver': 'svd'}
	Test	0.875	0.875	0.875	0.875	0.875
	Test ST	0.875	0.95	0.8	0.826087	0.941176
	Test ZG	0.875	0.8	0.95	0.941176	0.826087
Support Vector Machine	CV	0.901198	0.898204	0.904192	0.903614	0.89881	{'C': 100, 'gamma': 'scale', 'kernel': 'linear'}
	Test	0.85	0.925	0.775	0.804348	0.911765
	Test ST	0.8	0.95	0.65	0.730769	0.928571
	Test ZG	0.9	0.9	0.9	0.9	0.9

## Sheet: Standard scaled HPT-R1
Classifier	Evaluation	Accuracy	Sensitivity	Specificity	PPV	NPV	Best Params
Logistic Regression	CV	0.889222	0.886228	0.892216	0.891566	0.886905	{'C': 10}
	Test	0.875	0.95	0.8	0.826087	0.941176
	Test ST	0.825	0.95	0.7	0.76	0.933333
	Test ZG	0.925	0.95	0.9	0.904762	0.947368
Linear Discriminant Analysis	CV	0.892216	0.874251	0.91018	0.906832	0.878613	{'solver': 'svd'}
	Test	0.875	0.875	0.875	0.875	0.875
	Test ST	0.875	0.95	0.8	0.826087	0.941176
	Test ZG	0.875	0.8	0.95	0.941176	0.826087
Support Vector Machine	CV	0.89521	0.874251	0.916168	0.9125	0.87931	{'C': 1, 'kernel': 'linear'}
	Test	0.8875	0.925	0.85	0.860465	0.918919
	Test ST	0.9	0.95	0.85	0.863636	0.944444
	Test ZG	0.875	0.9	0.85	0.857143	0.894737

## Sheet: Standard scaled HPT-R2
Classifier	Evaluation	Accuracy	Sensitivity	Specificity	PPV	NPV	Best Params
Logistic Regression	CV	0.892216	0.892216	0.892216	0.892216	0.892216	{'C': 1, 'penalty': 'l1', 'solver': 'liblinear'}
	Test	0.9	0.95	0.85	0.863636	0.944444
	Test ST	0.9	0.95	0.85	0.863636	0.944444
	Test ZG	0.9	0.95	0.85	0.863636	0.944444
Linear Discriminant Analysis	CV	0.892216	0.874251	0.91018	0.906832	0.878613	{'shrinkage': None, 'solver': 'svd'}
	Test	0.875	0.875	0.875	0.875	0.875
	Test ST	0.875	0.95	0.8	0.826087	0.941176
	Test ZG	0.875	0.8	0.95	0.941176	0.826087
Support Vector Machine	CV	0.89521	0.874251	0.916168	0.9125	0.87931	{'C': 1, 'gamma': 'scale', 'kernel': 'linear'}
	Test	0.8875	0.925	0.85	0.860465	0.918919
	Test ST	0.9	0.95	0.85	0.863636	0.944444
	Test ZG	0.875	0.9	0.85	0.857143	0.894737

## Sheet: Standard raw HPT-R1 RFE
Classifier	Evaluation	Accuracy	Sensitivity	Specificity	PPV	NPV	Best Params	Selected Features
Logistic Regression	CV	0.904192	0.91018	0.898204	0.899408	0.909091	{'C': 0.1}	GOL, NOL, XCB, ZYB, BBH, BNL, AUB, WFB, NLH_L, NLH_R, NLB, OBB_L, OBB_R, OBH_L, OBH_R, EKB, DKB, FRC, PAC, OCC, FOL, FOB, MDH_L, MDH_R, ZOB
	Test	0.8875	0.95	0.825	0.844444	0.942857
	Test ST	0.85	0.95	0.75	0.791667	0.9375
	Test ZG	0.925	0.95	0.9	0.904762	0.947368
Linear Discriminant Analysis	CV	0.904192	0.898204	0.91018	0.909091	0.899408	{'solver': 'svd'}	GOL, NOL, ZYB, AUB, NLH_L, NLH_R, OBB_L, OBH_L, OBH_R, EKB, DKB, MDH_L
	Test	0.9	0.925	0.875	0.880952	0.921053
	Test ST	0.875	0.95	0.8	0.826087	0.941176
	Test ZG	0.925	0.9	0.95	0.947368	0.904762
Support Vector Machine	CV	0.913174	0.922156	0.904192	0.905882	0.920732	{'C': 0.1, 'kernel': 'linear'}	GOL, NOL, XCB, ZYB, BBH, BNL, AUB, WFB, NLH_L, NLH_R, OBB_L, OBH_L, OBH_R, FRC, PAC, OCC, FOL, FOB, MDH_L, MDH_R, ZOB
	Test	0.8625	0.9	0.825	0.837209	0.891892
	Test ST	0.875	0.95	0.8	0.826087	0.941176
	Test ZG	0.85	0.85	0.85	0.85	0.85

## Sheet: Standard raw HPT-R2 RFE
Classifier	Evaluation	Accuracy	Sensitivity	Specificity	PPV	NPV	Best Params	Selected Features
Logistic Regression	CV	0.904192	0.91018	0.898204	0.899408	0.909091	{'C': 0.1, 'penalty': 'l2', 'solver': 'newton-cg'}	GOL, NOL, XCB, ZYB, BBH, BNL, AUB, WFB, NLH_L, NLH_R, NLB, OBB_L, OBB_R, OBH_L, OBH_R, EKB, DKB, FRC, PAC, OCC, FOL, FOB, MDH_L, MDH_R, ZOB
	Test	0.8875	0.95	0.825	0.844444	0.942857
	Test ST	0.85	0.95	0.75	0.791667	0.9375
	Test ZG	0.925	0.95	0.9	0.904762	0.947368
Linear Discriminant Analysis	CV	0.904192	0.898204	0.91018	0.909091	0.899408	{'shrinkage': None, 'solver': 'svd'}	GOL, NOL, ZYB, AUB, NLH_L, NLH_R, OBB_L, OBH_L, OBH_R, EKB, DKB, MDH_L
	Test	0.9	0.925	0.875	0.880952	0.921053
	Test ST	0.875	0.95	0.8	0.826087	0.941176
	Test ZG	0.925	0.9	0.95	0.947368	0.904762
Support Vector Machine	CV	0.901198	0.898204	0.904192	0.903614	0.89881	{'C': 100, 'gamma': 'scale', 'kernel': 'linear'}	GOL, NOL, XCB, ZYB, BBH, BNL, AUB, WFB, UFBR, NLH_L, NLH_R, NLB, OBB_L, OBB_R, OBH_L, OBH_R, EKB, DKB, FRC, PAC, OCC, FOL, FOB, MDH_L, MDH_R, ASB, ZMB, ZOB
	Test	0.85	0.925	0.775	0.804348	0.911765
	Test ST	0.8	0.95	0.65	0.730769	0.928571
	Test ZG	0.9	0.9	0.9	0.9	0.9

## Sheet: Standard scaled HPT-R1 RFE
Classifier	Evaluation	Accuracy	Sensitivity	Specificity	PPV	NPV	Best Params	Selected Features
Logistic Regression	CV	0.901198	0.892216	0.91018	0.908537	0.894118	{'C': 10}	GOL, NOL, XCB, ZYB, BBH, BNL, AUB, WFB, NLH_L, NLH_R, OBB_L, OBB_R, OBH_L, OBH_R, EKB, DKB, FRC, PAC, OCC, FOL, FOB, MDH_L, MDH_R, ZOB
	Test	0.875	0.95	0.8	0.826087	0.941176
	Test ST	0.825	0.95	0.7	0.76	0.933333
	Test ZG	0.925	0.95	0.9	0.904762	0.947368
Linear Discriminant Analysis	CV	0.913174	0.898204	0.928144	0.925926	0.901163	{'solver': 'svd'}	GOL, NOL, XCB, ZYB, BNL, AUB, WFB, NLH_L, NLH_R, EKB, MDH_L
	Test	0.925	0.95	0.9	0.904762	0.947368
	Test ST	0.9	1	0.8	0.833333	1
	Test ZG	0.95	0.9	1	1	0.909091
Support Vector Machine	CV	0.913174	0.892216	0.934132	0.93125	0.896552	{'C': 1, 'kernel': 'linear'}	GOL, NOL, XCB, ZYB, BBH, AUB, WFB, NLH_L, NLH_R, OBB_L, OBH_R, FRC, PAC, OCC, FOL, FOB, MDH_L, ZOB
	Test	0.9125	0.925	0.9	0.902439	0.923077
	Test ST	0.925	0.95	0.9	0.904762	0.947368
	Test ZG	0.9	0.9	0.9	0.9	0.9
*Selected models (Table 1)

[truncated: 37 more sheets: Standard scaled HPT-R2 RFE, WRD Standard raw, WRD Standard scaled, WRD Standard raw HPT-R1, WRD Standard scaled HPT-R1, WRD Standard raw HPT-R2 , WRD Standard scaled HPT-R2, WRD Standard raw HPT-R1 RFE, WRD Standard scaled HPT-R1 RFE, WRD Standard raw HPT-R2 RFE , WRD Standard scaled HPT-R2 RFE, All raw, All scaled, All raw HPT-R1, All scaled HPT-R1, All raw HPT-R2, All scaled HPT-R2, All WRD raw, All WRD scaled, All WRD raw HPT-R1 …]
